# Supplementary material for: Oocyte mitochondria link maternal environment to offspring phenotype
Source: Research Square preprint supplement (doi:10.21203/rs.3.rs-4087193/v1), 2024-03-29
Supplement: Supplementary file 1 [file 3cfb34274108c710b213e26f.xlsx]

## Sheet: nduf-7 vs WT 
Gene.ID	logFC	AveExpr	t	P.Value	adj.P.Val	Sig
R08F11.1	2.29543	16.3371	15.9512	2.3008e-12	1.52336e-08	FDR
hsp-6	1.05105	23.9859	12.5799	1.37337e-10	4.54653e-07	FDR
rips-1	3.89211	18.9446	11.3697	8.12076e-10	1.79225e-06	FDR
aldo-1	3.98289	20.5872	9.98024	6.63441e-09	1.09816e-05	FDR
K11H12.8	0.971216	20.8525	9.31743	1.81713e-08	2.40624e-05	FDR
nuo-1	-1.46537	20.4615	-8.70688	5.42831e-08	5.79032e-05	FDR
F56C11.3	0.942522	16.8021	8.57686	6.48443e-08	5.79032e-05	FDR
ldh-1	2.00568	22.8525	8.46146	8.44088e-08	5.79032e-05	FDR
F59B1.8	2.09578	16.7124	8.4596	8.46866e-08	5.79032e-05	FDR
C16H3.3	-1.12891	17.4464	-8.39461	8.9619e-08	5.79032e-05	FDR
Y69A2AR.3	-1.24661	17.8264	-8.35502	9.61992e-08	5.79032e-05	FDR
cht-1	1.05241	21.0844	8.02683	1.74442e-07	9.62481e-05	FDR
Y94H6A.8	-1.46061	21.1248	-7.83412	2.61202e-07	0.000133032	FDR
lonp-1	0.541244	20.5004	7.73912	2.97381e-07	0.00014064	FDR
nuo-5	-1.10346	21.1836	-7.69619	3.24769e-07	0.000143353	FDR
F53F4.10	-1.13427	19.5442	-7.58657	4.01047e-07	0.000165958	FDR
nduf-5	-1.456	19.2099	-7.55964	4.36265e-07	0.000169912	FDR
nuo-2	-1.63541	19.6474	-7.34838	6.54736e-07	0.000239752	FDR
T23G7.3	-0.449232	15.7637	-7.29827	6.88005e-07	0.000239752	FDR
tufm-1.	0.666229	22.472	7.18398	8.58794e-07	0.000284304	FDR
C37A5.7	1.20714	16.5463	7.13068	9.52926e-07	0.000300444	FDR
Y54F10AM.5	-1.03812	19.6346	-6.99419	1.2587e-06	0.000378812	FDR
cisd-3.2	-0.871637	17.6803	-6.94287	1.37901e-06	0.000396974	FDR
dgat-2	1.94266	16.5063	6.90644	1.54622e-06	0.000426564	FDR
aco-2	0.588109	23.5535	6.83299	1.71563e-06	0.000454368	FDR
M199.2	0.975048	17.0182	6.76926	1.94883e-06	0.000465181	FDR
nduf-2.2	-2.59043	19.333	-6.78617	1.96257e-06	0.000465181	FDR
nduf-11	-0.96521	18.2178	-6.76457	1.96723e-06	0.000465181	FDR
tbc-1	1.189	17.8162	6.73292	2.14017e-06	0.000486309	FDR
nduo-1	-2.23887	18.4524	-6.71749	2.25081e-06	0.000486309	FDR
C34C12.8	0.575847	20.5153	6.69181	2.27693e-06	0.000486309	FDR
nduf-6	-1.41019	17.4034	-6.64185	2.60598e-06	0.000521208	FDR
lpd-5	-1.57038	18.5144	-6.64011	2.62865e-06	0.000521208	FDR
kat-1	0.502709	21.9641	6.60076	2.73681e-06	0.000521208	FDR
C34B2.8	-0.956201	18.1416	-6.59746	2.75521e-06	0.000521208	FDR
pam-1.1	0.557646	16.0423	6.57314	2.89453e-06	0.000524921	FDR
C33A12.1	-1.4443	20.7023	-6.58564	2.93341e-06	0.000524921	FDR
Y63D3A.7	-0.882754	21.5468	-6.49777	3.37444e-06	0.000587951	FDR
nduf-7	-2.39154	20.0572	-6.39795	4.29399e-06	0.000728988	FDR
F45H10.3	-1.84735	20.7768	-6.32389	4.99709e-06	0.000827143	FDR
unc-132	1.38983	17.4912	6.3043	5.20224e-06	0.000840099	FDR
F59C6.5	-0.974185	20.6665	-6.24125	5.80256e-06	0.000914732	FDR
Y51H1A.3	-0.853718	17.7709	-6.20154	6.21167e-06	0.000925051	FDR
nuo-4	-0.798122	20.4068	-6.19879	6.24725e-06	0.000925051	FDR
ZC506.1	-0.442585	16.7736	-6.19573	6.28716e-06	0.000925051	FDR
Y105C5B.19	0.975442	18.2767	6.15989	6.82924e-06	0.000965144	FDR
T20H4.5	-2.07921	17.8593	-6.17089	6.8512e-06	0.000965144	FDR
cysl-3	1.07981	19.2459	6.15241	7.07822e-06	0.000975296	FDR
Y106G6D.5	0.452151	16.9072	6.1295	7.21787e-06	0.000975296	FDR
gas-1	-1.15174	19.7195	-6.10431	7.84303e-06	0.00101953	FDR
ppgn-1	0.399584	18.3049	6.08916	7.85319e-06	0.00101953	FDR
K07E3.1	-0.398013	16.8098	-6.07581	8.07576e-06	0.00102826	FDR
T16G12.3	0.613244	15.8394	6.04671	8.58406e-06	0.00107236	FDR
qdpr-1	0.805265	18.1527	5.97742	9.93103e-06	0.00121765	FDR
Y20F4.4	0.753623	15.8195	5.95782	1.03502e-05	0.00124598	FDR
mans-1	-1.82591	18.417	-5.95176	1.08227e-05	0.00127911	FDR
ctsa-1.1	0.681714	22.3789	5.92849	1.10118e-05	0.00127911	FDR
Y43F8B.2	0.74806	17.0068	5.90756	1.15103e-05	0.00131396	FDR
ZC373.5	0.630546	16.0638	5.82519	1.37085e-05	0.00153837	FDR
dao-5	-0.666344	19.1805	-5.78914	1.48019e-05	0.00163339	FDR
K12H4.5	-1.99274	19.5132	-5.78154	1.55027e-05	0.00168268	FDR
zipt-7.1	1.06342	16.4497	5.74655	1.63633e-05	0.00174744	FDR
ZK550.3	-0.486024	19.4578	-5.72155	1.71003e-05	0.00179716	FDR
lin-15B	0.847171	17.7067	5.71101	1.74902e-05	0.00180942	FDR
plp-1	0.303263	22.8718	5.63109	2.0762e-05	0.00211485	FDR
spg-7	0.479807	20.787	5.61644	2.14267e-05	0.00214949	FDR
paqr-1	0.662852	16.9435	5.602	2.2103e-05	0.00218424	FDR
ZK370.4	0.518192	16.9785	5.58583	2.28865e-05	0.0022284	FDR
nduf-9	-1.30961	20.8412	-5.5735	2.41675e-05	0.00231903	FDR
F20D1.3	1.37904	18.7459	5.55251	2.52818e-05	0.00239129	FDR
suca-1	0.410907	22.4374	5.49044	2.81257e-05	0.00262282	FDR
F19C6.5	0.682477	16.1886	5.48259	2.86081e-05	0.00263075	FDR
B0511.6	-0.616219	18.0238	-5.4471	3.08981e-05	0.00280242	FDR
T09B9.4	0.912293	17.2312	5.43598	3.16646e-05	0.00283313	FDR
ZK185.5	0.851598	15.9678	5.38311	3.56458e-05	0.00311781	FDR
Y54G11A.7	0.640437	16.2241	5.37417	3.62096e-05	0.00311781	FDR
T07D3.9	0.338952	18.6803	5.37354	3.6259e-05	0.00311781	FDR
cyp-13B1	1.73468	17.0817	5.37349	3.72119e-05	0.00315872	FDR
gid-7	1.31722	17.0718	5.3599	3.83253e-05	0.00319259	FDR
nft-1	0.47706	17.511	5.34515	3.85754e-05	0.00319259	FDR
ZK550.6	0.953987	18.7587	5.34074	3.97823e-05	0.00321217	FDR
ptc-1	0.773851	17.3294	5.33106	3.97801e-05	0.00321217	FDR
cest-6	-0.512732	16.4384	-5.29083	4.34377e-05	0.00343098	FDR
T10B10.3	0.549962	17.2554	5.28657	4.38443e-05	0.00343098	FDR
nuo-6	-0.852656	17.861	-5.28662	4.40467e-05	0.00343098	FDR
ucr-2.2	0.979905	18.7076	5.27999	4.54205e-05	0.00347202	FDR
Y73F4A.1	0.853115	18.5095	5.27164	4.56224e-05	0.00347202	FDR
T10B11.6	0.363207	17.5076	5.23216	4.93969e-05	0.00371655	FDR
lin-40	0.763193	21.0325	5.22533	5.04322e-05	0.00375181	FDR
acl-1	0.670984	16.1152	5.21522	5.12678e-05	0.0037716	FDR
D2030.4	-0.621	18.9611	-5.18764	5.44708e-05	0.00394301	FDR
C46C2.2	0.761288	18.9042	5.18514	5.47888e-05	0.00394301	FDR
dhs-19	0.792181	18.9917	5.18057	5.56382e-05	0.00395957	FDR
cyp-44A1	-0.593222	18.6266	-5.17299	5.62552e-05	0.00395957	FDR
clpf-1	0.413491	19.1654	5.16251	5.75679e-05	0.00395957	FDR
C24H12.4	-0.492513	17.5925	-5.15605	5.83917e-05	0.00395957	FDR
H40L08.1	0.440384	17.5325	5.15575	5.84303e-05	0.00395957	FDR
nuo-3	-0.739083	18.317	-5.15438	5.86072e-05	0.00395957	FDR
fcp-1	0.287034	19.7325	5.12191	6.29539e-05	0.00421028	FDR
Y11D7A.7	0.715742	16.8257	5.08093	6.89147e-05	0.00456284	FDR
gakh-1	-0.639068	16.6265	-5.07001	7.05977e-05	0.00459633	FDR
tbc-9	-0.36832	16.8705	-5.06866	7.08089e-05	0.00459633	FDR
asns-2	2.56377	19.3853	5.05892	7.40067e-05	0.00475726	FDR
R04B3.2	0.681789	18.8732	5.03152	7.68706e-05	0.00489385	FDR
btb-7	0.69725	16.189	5.01077	8.04872e-05	0.00507529	FDR
alh-5	0.764492	17.2928	5.00217	8.20362e-05	0.00512036	FDR
eat-3	-0.432143	19.2845	-4.99827	8.27485e-05	0.00512036	FDR
B0432.10	-0.3581	17.0652	-4.95634	9.08151e-05	0.00556747	FDR
emb-8	0.36011	20.0325	4.94314	9.35176e-05	0.00565284	FDR
C25H3.9	-0.514085	16.1534	-4.94123	9.39151e-05	0.00565284	FDR
F59B1.2	1.82113	17.2292	4.92843	9.87135e-05	0.00588813	FDR
Y39B6A.3	0.433941	17.0714	4.89893	0.00010318	0.00609957	FDR
ZK809.3	-0.833043	20.7038	-4.90277	0.000104115	0.00610038	FDR
F53F4.11	-0.643429	19.0586	-4.8833	0.000106833	0.00620474	FDR
plpp-1.2	1.25877	16.9578	4.8728	0.000111663	0.006319	FDR
gphr-1	0.469275	16.6176	4.86425	0.000111464	0.006319	FDR
adss-1	0.546772	21.2059	4.86414	0.000111493	0.006319	FDR
ZK353.9	0.400355	19.4343	4.85457	0.000113896	0.00634719	FDR
Y39B6A.33	-0.411523	16.3889	-4.85385	0.000114079	0.00634719	FDR
fbxa-153	0.675305	17.0356	4.83302	0.000119503	0.00659359	FDR
fars-1	-0.454206	21.395	-4.80312	0.000127753	0.00699052	FDR
rps-18	-0.246682	22.9425	-4.79143	0.000131133	0.00711663	FDR
tex-2	0.39816	19.6561	4.77896	0.000134838	0.00723198	FDR
fbxc-52	-0.39282	18.26	-4.77696	0.000135443	0.00723198	FDR
nog-1	-0.811995	19.043	-4.78036	0.000136621	0.00723654	FDR
acl-8	-0.49818	17.0327	-4.76683	0.000138545	0.00728019	FDR
Y49F6C.8	-1.19537	17.8266	-4.75599	0.000144773	0.00754756	FDR
F07E5.5	-0.457621	16.2164	-4.71928	0.000154102	0.00797119	FDR
nprt-1	0.552167	19.518	4.69131	0.000164071	0.00842104	FDR
nlp-28	1.34936	19.2626	4.68308	0.000170338	0.00867543	FDR
acer-1	0.458427	22.7274	4.64955	0.000180188	0.00910705	FDR
sax-2	-0.503135	18.3573	-4.64367	0.000182581	0.00915808	FDR
C50D2.9	0.34316	18.6842	4.63278	0.000187099	0.00929091	FDR
vpat-1	0.556543	16.4261	4.62818	0.000189045	0.00929091	FDR
flp-1	0.556233	18.0265	4.62725	0.000189439	0.00929091	FDR
ZK673.2	0.614843	19.9055	4.6211	0.000192073	0.00935084	FDR
mccc-1	0.321065	21.1132	4.58478	0.000208416	0.0100724	FDR
W09C5.1	-0.745633	18.3858	-4.5794	0.000212044	0.0101667	FDR
M01F1.4	0.53521	19.2862	4.5742	0.000213437	0.0101667	FDR
B0495.5	0.31474	18.1049	4.56083	0.000219955	0.0104023	FDR
Y49E10.4	-0.610338	17.7709	-4.54726	0.000226775	0.0106488	FDR
Y61A9LA.10	-0.475167	18.6823	-4.53401	0.000233643	0.010894	FDR
ipgm-1	0.492007	21.4718	4.52883	0.000236388	0.0109449	FDR
inx-14	0.677279	18.7918	4.5199	0.000241807	0.0111181	FDR
Y71H2AM.4	-0.765151	17.0821	-4.49507	0.000255153	0.0116508	FDR
cyp-25a3	0.727847	15.8783	4.48128	0.000264202	0.0119814	FDR
sqd-1	-0.468369	19.0667	-4.4731	0.000268028	0.0120722	FDR
eif-2alpha	0.321721	21.8663	4.46403	0.000273568	0.0122385	FDR
W08F4.3	0.560825	20.1934	4.46104	0.00027542	0.0122386	FDR
ilcr-2	-0.443115	17.3407	-4.44281	0.000286992	0.0126244	FDR
ngp-1	-0.710795	18.8028	-4.44042	0.000290226	0.0126244	FDR
nkat-3	0.477454	19.4071	4.43682	0.000290899	0.0126244	FDR
htz-1	0.682505	22.6961	4.44049	0.000291729	0.0126244	FDR
H06I04.3	-0.516997	18.3796	-4.42527	0.000298582	0.012743	FDR
prdx-2	0.301755	23.2549	4.42381	0.000299571	0.012743	FDR
C03H5.3	-0.468472	17.4707	-4.42282	0.000300242	0.012743	FDR
semo-1	0.702499	17.5064	4.41097	0.000308384	0.0130051	FDR
D2030.2	0.419987	19.8808	4.4068	0.000311306	0.0130453	FDR
sid-1	-0.678706	16.0527	-4.40225	0.000314522	0.0130972	FDR
T20B3.1	0.847415	17.9043	4.3934	0.000325325	0.0134623	FDR
ndx-2	0.577594	15.7267	4.37896	0.000331518	0.0136334	FDR
pha-1	-0.384788	16.56	-4.37186	0.000336884	0.0137686	FDR
glrx-5	0.331365	20.5227	4.36433	0.000342666	0.013919	FDR
Y47G6A.18	-0.376249	19.103	-4.36138	0.000344964	0.0139269	FDR
gfm-1	0.328176	19.606	4.34672	0.000356595	0.0143092	FDR
F35C11.5	0.849003	17.6899	4.34519	0.000362657	0.0144648	FDR
F42H10.6	0.506505	18.1197	4.31337	0.000384545	0.0151421	FDR
Y37D8A.2	0.563725	19.83	4.31074	0.000386839	0.0151421	FDR
mdt-15	-0.231769	17.9692	-4.3077	0.000389511	0.0151421	FDR
ubc-3	-0.561881	17.9889	-4.30742	0.000389756	0.0151421	FDR
cht-4	0.686398	16.7084	4.30169	0.000394847	0.0151421	FDR
T22C1.6	-0.391255	19.9174	-4.30093	0.000395525	0.0151421	FDR
alh-7	0.503333	19.6479	4.3	0.000396359	0.0151421	FDR
lpd-6	-0.390985	17.6147	-4.29824	0.000397935	0.0151421	FDR
ZK632.2	0.344515	19.1457	4.28479	0.000410248	0.0155214	FDR
fis-2	0.693936	18.0657	4.28031	0.000415936	0.0156472	FDR
Y54E10A.10	-0.503276	18.0116	-4.27017	0.000424053	0.0158614	FDR
srf-3	-0.432615	17.2806	-4.26535	0.000428712	0.0158614	FDR
B0035.15	0.290631	21.2363	4.26524	0.000428816	0.0158614	FDR
bckd-1a	0.26864	20.2353	4.2563	0.000437594	0.0160962	FDR
let-504	-0.292779	16.7673	-4.23862	0.000455474	0.0166408	FDR
slc-25a32	-0.336624	15.9956	-4.23523	0.000458987	0.0166408	FDR
F10E7.6	0.410393	17.7436	4.23432	0.00045994	0.0166408	FDR
W02H5.2	0.338218	17.1144	4.21201	0.000483786	0.0174084	FDR
eak-7	0.302333	19.7163	4.20316	0.000493592	0.0176652	FDR
C25H3.3	0.529645	17.1626	4.19889	0.000498392	0.0177412	FDR
inx-8	0.785097	18.3842	4.20162	0.000501489	0.0177559	FDR
T20B12.3	-0.289058	15.9333	-4.19008	0.000508452	0.0179067	FDR
rbm-34	-0.421282	18.0511	-4.18419	0.000515295	0.0180517	FDR
Y4C6B.3	0.366601	21.4975	4.16996	0.000532195	0.0184487	FDR
nst-1	-0.440918	18.5254	-4.16995	0.0005322	0.0184487	FDR
ZK795.3	-0.335299	17.1534	-4.14196	0.00056709	0.0195557	FDR
pus-1	-0.399318	17.3411	-4.13611	0.000574672	0.0197145	FDR
kin-10	-0.272272	19.7194	-4.13197	0.000580088	0.0197977	FDR
lpd-7	-0.507215	18.3327	-4.12478	0.000589633	0.0200203	FDR
atg-2	-0.337258	17.5032	-4.1137	0.000604651	0.0204255	FDR
iscu-1	0.349486	18.1715	4.10781	0.000612789	0.0205429	FDR
Y39G10AR.11	-0.343311	17.9523	-4.10501	0.000616685	0.0205429	FDR
dhs-22	0.319891	18.8132	4.10264	0.000620013	0.0205429	FDR
spp-10	0.61525	20.7865	4.10372	0.000620538	0.0205429	FDR
nhr-10	-0.332789	17.0558	-4.07545	0.000659491	0.0217238	FDR
tin-44	0.277688	18.979	4.06915	0.000668985	0.0218956	FDR
pcp-5	0.564168	19.6823	4.06705	0.00067218	0.0218956	FDR
trap-1	-0.341481	22.3537	-4.06455	0.000676011	0.0218956	FDR
sur-5	-0.401262	17.2254	-4.0633	0.000677935	0.0218956	FDR
W03G11.3	0.971024	16.595	4.06469	0.000685026	0.0219109	FDR
F26F12.3	-0.551033	16.0061	-4.05901	0.00068456	0.0219109	FDR
sna-2	-0.245364	19.2112	-4.04908	0.000700168	0.0222127	FDR
imp-3	0.407443	17.5375	4.04845	0.000701172	0.0222127	FDR
rpc-11	0.466253	17.4209	4.04586	0.000705317	0.0222376	FDR
Y75B8A.7	-0.395661	17.4642	-4.04282	0.000710202	0.0222855	FDR
har-1	1.12483	19.2953	4.03911	0.000725826	0.0225619	FDR
C50F4.12	0.407836	16.1628	4.03423	0.00072419	0.0225619	FDR
F31D4.2	-0.368911	16.8137	-4.02755	0.000735256	0.0227483	FDR
R04D3.3	0.621302	17.2054	4.0219	0.000744743	0.0229346	FDR
znf-622	-0.455689	18.9995	-4.01134	0.000762822	0.0233826	FDR
K02B12.7	-0.258011	18.1305	-4.00417	0.000775341	0.023511	FDR
dif-1	0.398211	21.1442	4.00361	0.000776334	0.023511	FDR
acs-4	0.254859	22.5303	4.00285	0.000777663	0.023511	FDR
Y71F9AL.9	-0.347552	21.9662	-3.99618	0.000789541	0.0236839	FDR
Y48A6B.3	-0.429211	20.0875	-3.99562	0.000790537	0.0236839	FDR
mfn-1	-0.485894	17.9833	-3.9858	0.000808377	0.0239956	FDR
F02E9.7	-0.504929	16.6514	-3.98545	0.000809021	0.0239956	FDR
F55F8.2	-0.438117	17.8662	-3.98393	0.000811815	0.0239956	FDR
cox-19	0.722868	17.42	3.97687	0.000829531	0.0243442	FDR
let-716	-0.536273	18.4837	-3.9724	0.000833354	0.0243442	FDR
pps-1	-0.504445	17.188	-3.97172	0.000834637	0.0243442	FDR
glod-4	0.469725	20.3874	3.96253	0.000852249	0.024672	FDR
puf-12	-0.529434	17.908	-3.96197	0.000853328	0.024672	FDR
Y32F6A.5	0.496036	19.7259	3.95275	0.000871385	0.0250845	FDR
gck-1	0.224237	18.8207	3.94952	0.000877799	0.0251598	FDR
T23D8.3	-0.237266	16.0649	-3.94524	0.00088637	0.0252959	FDR
Y39A1A.21	-0.375584	17.7609	-3.94111	0.000894721	0.0254247	FDR
ZK546-14	-0.376575	16.9072	-3.93677	0.000903587	0.0255669	FDR
dld-1	0.325008	20.4812	3.91702	0.000945043	0.0266261	FDR
pro-2	-0.339699	17.9321	-3.9041	0.000973181	0.0273027	FDR
cysl-2	0.547492	19.5607	3.8971	0.000988779	0.0276232	FDR
aatf-1	-0.354871	16.8563	-3.88055	0.00102664	0.0283677	FDR
fgt-1	0.696037	19.7296	3.88122	0.00103554	0.0283677	FDR
F49D11.10	-0.343168	18.1336	-3.87669	0.00103569	0.0283677	FDR
pccb-1	0.333121	21.9543	3.87622	0.00103679	0.0283677	FDR
B0024.11	-0.337091	17.9678	-3.8752	0.00103919	0.0283677	FDR
Y53F4B-39.1	0.622401	17.8157	3.87392	0.00104405	0.0283677	FDR
EEED8.15	-0.344244	16.528	-3.87257	0.00104542	0.0283677	FDR
fbxa-65	1.11066	15.9749	3.84648	0.00112239	0.0303319	FDR
rps-6	-0.203721	24.8649	-3.83548	0.00113726	0.030609	FDR
unc-76	-0.272143	16.6087	-3.83302	0.00114363	0.0306221	FDR
sql-1	-0.261708	17.9012	-3.83173	0.001147	0.0306221	FDR
Y49F6B.2	-0.348537	17.3008	-3.81716	0.00118557	0.0315248	FDR
fre-1	0.413053	18.4087	3.81387	0.00119446	0.031634	FDR
hoe-1	0.333932	18.0682	3.80635	0.00121503	0.0320507	FDR
Y52B11A.10	-0.24175	15.8277	-3.79845	0.001237	0.0325008	FDR
acp-5	0.574707	15.8958	3.79549	0.00124534	0.0325904	FDR
larp-1	-0.262216	20.4771	-3.78903	0.00126375	0.0329244	FDR
fubl-2	-0.257599	20.4154	-3.78753	0.00126804	0.0329244	FDR
F53A10.2	-0.22875	15.6611	-3.76643	0.00133025	0.0344046	FDR
F23B12.7	-0.381756	18.2515	-3.75459	0.00136646	0.0351647	FDR
cls-1	-0.271089	15.6788	-3.75337	0.00137026	0.0351647	FDR
pyc-1	0.362311	21.7645	3.75093	0.00137786	0.0352231	FDR
D2030.3	-0.319918	16.672	-3.74466	0.00139759	0.0354572	FDR
lin-65	-0.32679	19.094	-3.74462	0.00139772	0.0354572	FDR
fubl-1	-0.305032	19.5351	-3.73143	0.00144018	0.0363947	FDR
Y45F10D.7	-0.317214	17.6876	-3.70802	0.00151869	0.0382329	FDR
F55F8.3	-0.270495	17.6038	-3.70374	0.00153352	0.03846	FDR
ppt-1	0.747417	18.2086	3.70539	0.00154276	0.0385324	FDR
hrg-7	1.3111	16.1719	3.70431	0.00154805	0.0385324	FDR
DC2.5	0.86664	16.8758	3.6961	0.00157702	0.039008	FDR
T10B5.3	-0.527675	18.3593	-3.69086	0.00157894	0.039008	FDR
rrbs-1	-0.500718	18.6822	-3.68834	0.00158799	0.0390858	FDR
cyn-13	-0.316305	19.1747	-3.68661	0.00159426	0.0390947	FDR
W05H9.1	1.06385	19.5621	3.68764	0.00160746	0.0392472	FDR
tbck-1	-0.283933	15.7376	-3.68163	0.00161233	0.0392472	FDR
clec-266	0.743128	21.1612	3.68215	0.00162755	0.0394726	FDR
C15C6.1	-1.10179	17.013	-3.6788	0.00163991	0.0394832	FDR
pro-1	-0.310704	17.5366	-3.67513	0.00163629	0.0394832	FDR
algn-5	-0.36718	18.0482	-3.67067	0.0016529	0.0396516	FDR
ecps-1	-0.273393	18.8114	-3.66687	0.00166717	0.0398497	FDR
lact-4	0.939882	18.9326	3.6698	0.0016736	0.039852	FDR
mtcu-2	-0.323895	16.7363	-3.66367	0.00167931	0.039852	FDR
W01A11.1	0.246809	20.0479	3.65391	0.00171688	0.0405981	FDR
F13H8.2	-0.322797	18.1021	-3.6469	0.00174434	0.0411006	FDR
C16A3.6	-0.557604	16.7327	-3.64263	0.00176131	0.0413534	FDR
44991	-0.535263	16.6231	-3.6401	0.00177144	0.0414441	FDR
Y54G11A.9	0.412689	17.0204	3.63639	0.00178637	0.0416463	FDR
icl-1	0.94175	22.564	3.63569	0.00180758	0.0419929	FDR
M05D6.5	0.402389	16.7961	3.62501	0.00183303	0.0424353	FDR
rbm-28	-0.360484	16.3237	-3.61736	0.00186503	0.0429415	FDR
F33E11.3	-0.359126	18.2512	-3.61571	0.00187203	0.0429415	FDR
erp-44.1	0.290053	21.2424	3.61354	0.00188125	0.0429415	FDR
Y51H7C.41	1.01534	15.6353	3.61558	0.00189152	0.0429415	FDR
F09C8.2	-0.251008	15.9422	-3.61071	0.00189334	0.0429415	FDR
ztf-6	0.384344	18.4061	3.6106	0.00189381	0.0429415	FDR
acox-3	0.848772	18.0928	3.59584	0.00197771	0.0445995	FDR
ugt-61	0.587006	16.5967	3.58874	0.00198986	0.0445995	FDR
tufm-2	0.392994	19.1789	3.58842	0.00199131	0.0445995	FDR
nifk-1	-0.428213	19.4317	-3.58785	0.00199388	0.0445995	FDR
madf-1	1.48889	16.4297	3.58178	0.00204142	0.0455092	FDR
C03H12.1	-0.3138	16.1578	-3.57244	0.00206464	0.0458724	FDR
vps-20	-0.378156	17.0467	-3.56507	0.00209934	0.0464875	FDR
spcs-1	0.35494	17.4514	3.5635	0.0021068	0.046497	FDR
epg-4	1.50384	16.6356	3.56329	0.00212831	0.0468159	FDR
abhd-11.2	0.388791	18.2464	3.54896	0.00217721	0.0477328	FDR
ubh-4	-0.251292	21.4489	-3.53501	0.00224693	0.0490988	FDR
T22D1.3	0.586673	20.7155	3.53493	0.00226483	0.0493272	FDR
dnj-10.1	0.297607	18.6015	3.52596	0.00229338	0.0497851	FDR
C06B8.7	0.561559	18.0521	3.52122	0.00232318	0.0502672	NS
miga-1	-0.363593	18.5844	-3.51732	0.00233858	0.0503488	NS
tsfm-1	0.388914	18.8819	3.51433	0.00235445	0.0503488	NS
T22F3.2	0.414944	16.9387	3.51386	0.00235694	0.0503488	NS
nola-3	-0.432626	20.662	-3.51377	0.00235739	0.0503488	NS
F54A3.2	0.292432	18.9528	3.51166	0.00236869	0.0503488	NS
arx-6	-0.220713	20.5488	-3.51093	0.00237258	0.0503488	NS
cox-5A	0.542568	22.0164	3.51174	0.00238164	0.0503796	NS
byn-1	-0.394461	18.3664	-3.50519	0.00240354	0.0504342	NS
nath-10	-0.495523	17.8366	-3.50423	0.00240875	0.0504342	NS
T02H6.1	-0.269737	17.9416	-3.50346	0.00241294	0.0504342	NS
ZK430.7	-0.274402	16.5847	-3.50174	0.00242233	0.0504342	NS
C53D6.4	-0.376362	16.8741	-3.50174	0.00242235	0.0504342	NS
cku-70	0.273559	19.7922	3.50035	0.00242992	0.0504342	NS
pcn-1	0.392911	23.0748	3.49519	0.00245845	0.0508668	NS
F47B7.2	-0.372346	18.098	-3.48591	0.00251048	0.051603	NS
myrf-1	0.421488	16.6004	3.48524	0.00251427	0.051603	NS
Y47G6A.22	0.478558	20.063	3.48469	0.00251741	0.051603	NS
pro-3	-0.317534	17.5135	-3.48281	0.00252807	0.0516617	NS
Y39G10AR.9	0.440431	20.2291	3.47136	0.00259429	0.0528516	NS
stl-1	0.424207	21.0416	3.46621	0.00262459	0.0533049	NS
snf-6	-0.238447	15.8758	-3.46412	0.00263697	0.0533926	NS
inos-1	-0.296669	20.675	-3.46093	0.00265599	0.0536137	NS
fbp-1	0.371918	20.1375	3.45872	0.00266929	0.0536596	NS
tag-321	-0.379481	16.9022	-3.45786	0.00267447	0.0536596	NS
bli-4	-0.400795	17.4898	-3.45444	0.00269519	0.0539119	NS
pigk-1	0.463476	17.9534	3.45246	0.00270725	0.0539901	NS
F10E9.11	-0.215331	15.932	-3.44014	0.00278347	0.0553434	NS
hpo-19	0.26985	20.4662	3.43676	0.00280478	0.0556001	NS
K01G5.8	0.737977	16.4164	3.42838	0.00288006	0.056922	NS
B0495.8	-0.249095	19.0843	-3.41407	0.00295185	0.0581672	NS
chk-1	0.996091	17.6084	3.4076	0.00302107	0.0592957	NS
top-1	-0.270275	19.6643	-3.4029	0.00302703	0.0592957	NS
R02C2.1	0.807782	16.6884	3.40249	0.00305597	0.0596861	NS
C16A3.5	-0.49685	20.0772	-3.39576	0.00307998	0.059978	NS
let-653	0.407538	18.7355	3.39313	0.00309437	0.0600815	NS
H41C03.1	-0.492956	17.0894	-3.38923	0.00312164	0.0602579	NS
rpl-25.1	-0.983762	20.5446	-3.39091	0.00313641	0.0602579	NS
aman-1	1.13448	19.1726	3.39072	0.00313775	0.0602579	NS
lnp-1	0.245066	17.9875	3.38664	0.00313986	0.0602579	NS
T23H2.3	0.332081	18.3849	3.38466	0.00315387	0.0603262	NS
art-1	0.235445	20.9615	3.38357	0.00316164	0.0603262	NS
F09E5.7	0.350876	18.2543	3.37865	0.00319678	0.0606938	NS
fusm-2	0.305517	17.5486	3.37831	0.00319924	0.0606938	NS
pdtf-1	-0.309855	16.2495	-3.377	0.00320866	0.0606986	NS
Y23H5B.5	-0.27384	17.5782	-3.37564	0.00321855	0.0607122	NS
ZK1098.11	0.288888	18.7523	3.37293	0.00323818	0.0609085	NS
gln-1	0.488042	17.0897	3.37167	0.00324735	0.0609085	NS
rpl-13	-0.210081	25.0706	-3.36933	0.00326451	0.0609399	NS
hsf-1	-0.335246	17.6039	-3.36883	0.00326816	0.0609399	NS
C18E9.4	-0.49747	19.273	-3.36822	0.00327664	0.0609399	NS
sqv-6	0.321632	17.3656	3.36161	0.00332161	0.0616034	NS
F44B9.5	0.274948	16.9316	3.3579	0.00334943	0.0619112	NS
C16C10.8	-0.389213	17.2347	-3.35633	0.00336128	0.0619112	NS
nol-10	-0.336937	17.2586	-3.35567	0.00336626	0.0619112	NS
T03F7.7	-0.561986	16.3011	-3.34495	0.00345	0.0632754	NS
ubc-13	-0.388449	18.9045	-3.34251	0.00346733	0.0633037	NS
rps-0	-0.239432	23.8245	-3.34208	0.00347066	0.0633037	NS
inx-3	0.542593	19.9148	3.3382	0.00351831	0.0639965	NS
nol-14	-0.28055	17.1262	-3.3276	0.00358539	0.0650379	NS
F27C1.6	-0.301266	16.934	-3.32561	0.00360136	0.0651492	NS
pcs-1	0.384127	15.8453	3.3226	0.00362584	0.0654133	NS
K07H8.2	-0.304832	16.8945	-3.32112	0.00363784	0.0654514	NS
hil-4	-0.380746	18.698	-3.31875	0.00365728	0.0655668	NS
Y94H6A.5	-0.322458	16.914	-3.31685	0.00367289	0.0655668	NS
ltah-1.1	0.410742	19.8699	3.31672	0.00367396	0.0655668	NS
slc-30a5	-0.313231	18.078	-3.31295	0.00370515	0.0659457	NS
irs-2	0.280554	21.4815	3.30716	0.0037536	0.066629	NS
spat-3	0.269028	17.1117	3.30364	0.00378338	0.0668375	NS
par-5	0.230082	24.5133	3.30338	0.00378554	0.0668375	NS
toe-1	-0.324321	18.3085	-3.29977	0.00381636	0.0670449	NS
pdcd-2	-0.337993	18.2011	-3.29963	0.00381754	0.0670449	NS
ucp-4	0.384272	17.4122	3.29539	0.00385401	0.0675063	NS
BE10.3	-0.320918	16.778	-3.29412	0.00386499	0.0675187	NS
hmg-1.1	0.580348	22.7365	3.29615	0.00387511	0.0675187	NS
dyn-1	0.38327	20.9406	3.29009	0.00390008	0.0677754	NS
pno-1	-0.305372	21.065	-3.28501	0.00394467	0.0683708	NS
gnrr-4	1.68187	17.9001	3.2846	0.00397929	0.0687908	NS
wht-2	-0.244904	17.8964	-3.27956	0.00399318	0.0688512	NS
haf-3	0.385863	19.2547	3.27831	0.00400438	0.0688649	NS
erl-1	0.434149	18.5091	3.27262	0.00405574	0.0695561	NS
tpi-1	0.301235	22.9131	3.27153	0.00406558	0.0695561	NS
vrk-1	0.248175	19.446	3.26863	0.0040921	0.0698293	NS
T15B12.1	-0.453976	16.1152	-3.26675	0.00410935	0.0699434	NS
trxr-2	0.254134	16.6891	3.25616	0.00420797	0.0714383	NS
dhs-18	0.574473	17.9231	3.25318	0.00425562	0.0720305	NS
cyn-13	-0.229656	17.5998	-3.25018	0.0042646	0.0720305	NS
nra-2	-0.170395	20.0802	-3.24831	0.00428252	0.0721491	NS
T21H3.1	0.563035	17.0198	3.24627	0.00430683	0.0723041	NS
zig-6	1.20808	17.0382	3.24784	0.00431962	0.0723041	NS
pho-14	0.466335	20.1545	3.24411	0.00432448	0.0723041	NS
Y18H1A.2	0.361432	16.0188	3.24008	0.00436205	0.0727485	NS
ule-4	0.930225	17.0207	3.23741	0.00442125	0.0735505	NS
F36A2.7	0.643517	21.8396	3.23563	0.00443887	0.0736586	NS
ins-34	-0.749252	16.3768	-3.22437	0.00455162	0.0751529	NS
vps-32.1	-0.216757	18.4151	-3.22143	0.00454777	0.0751529	NS
mboa-3	0.413877	15.5199	3.2161	0.00460221	0.0756438	NS
C08F1.10	0.487562	16.5063	3.2159	0.0046042	0.0756438	NS
tgs-1	-0.239245	17.8812	-3.21462	0.00461745	0.0756736	NS
cox-5b	0.681308	18.8714	3.21436	0.00465425	0.0760884	NS
Y42A5A.5	0.433885	17.1568	3.20267	0.00474225	0.0773361	NS
gst-7	0.360822	23.0436	3.19539	0.00481996	0.0784102	NS
F44G4.1	-0.30972	17.464	-3.19319	0.00484369	0.078603	NS
T04G9.7	0.526866	18.5107	3.18569	0.00493993	0.0799689	NS
C26E6.12	0.422605	16.0934	3.18316	0.00495323	0.0799886	NS
W03F9.2	0.525847	15.8513	3.18069	0.00499416	0.0802582	NS
C16C2.4	-0.28966	16.7536	-3.17972	0.00499134	0.0802582	NS
C53H9.2	-0.245374	19.016	-3.17835	0.00500663	0.0802636	NS
C02D5.2	-0.512215	16.7621	-3.17246	0.00507277	0.0811275	NS
Y92H12BL.5	-0.411299	15.7647	-3.1625	0.00518663	0.0827486	NS
glh-2	-0.399467	18.329	-3.15945	0.005222	0.0831126	NS
gly-9	-0.384926	17.3788	-3.15663	0.0052549	0.0834335	NS
rep-1	0.26223	17.1229	3.15505	0.0052734	0.0834335	NS
ckb-4	0.276464	17.2482	3.15449	0.00527996	0.0834335	NS
cox-18	-0.461342	17.06	-3.15093	0.00532197	0.0838971	NS
cpt-1	0.248229	20.5501	3.14923	0.00534209	0.0840142	NS
ras-2	-0.500833	16.8819	-3.14557	0.00538581	0.0843101	NS
mics-1	-0.275694	18.5226	-3.1451	0.00539149	0.0843101	NS
F10C2.5	-0.265972	17.0181	-3.14446	0.00539911	0.0843101	NS
ran-3	0.301538	20.6472	3.13536	0.00550955	0.0858323	NS
acdh-11	0.312732	19.4138	3.13327	0.00553515	0.0860287	NS
smgl-2	-0.22478	16.3785	-3.12616	0.00562342	0.0871959	NS
gln-5	0.611605	21.5456	3.12761	0.00564375	0.0873067	NS
ets-6	-0.227508	15.9755	-3.12225	0.00567243	0.0875185	NS
dad-1	-0.356002	19.8367	-3.12135	0.00568388	0.0875185	NS
txdc-17	0.41213	20.0401	3.11432	0.00577334	0.0886898	NS
F53B1.8	-0.178045	15.6208	-3.1116	0.00580827	0.0890197	NS
dlc-1	0.422916	19.2833	3.10992	0.00582991	0.0891451	NS
hsp-75	0.223939	20.224	3.107	0.00586792	0.0895196	NS
golg-2	-0.185923	19.2706	-3.10384	0.00590923	0.0896297	NS
ergo-1	-0.394935	20.2137	-3.1038	0.0059097	0.0896297	NS
atgl-1	0.313678	15.9862	3.10334	0.00591575	0.0896297	NS
K01G5.5	-0.40389	21.165	-3.09905	0.00597239	0.0902812	NS
acly-1	0.317953	21.1418	3.09665	0.00600425	0.0905562	NS
F23C8.5	0.28669	22.0703	3.0926	0.00605844	0.0911657	NS
vit-3	-1.5415	23.4007	-3.09289	0.00609477	0.0915045	NS
Y39A3CL.4	0.277571	19.8626	3.08653	0.00614051	0.0919827	NS
col-165	-0.693678	16.4924	-3.08809	0.0061556	0.0920006	NS
mmcm-1	0.210671	20.3055	3.08416	0.00617288	0.092051	NS
ZK512.2	-0.343999	18.0416	-3.08143	0.00621041	0.0924025	NS
R102-4	0.620784	17.558	3.08183	0.00623923	0.0926232	NS
cope-1	-0.206971	21.2067	-3.07702	0.00627137	0.0928921	NS
efk-1	-0.335211	17.4418	-3.07478	0.00630266	0.0931471	NS
F46B6.6	0.282909	17.015	3.07247	0.00633495	0.0934159	NS
syx-4	-0.55141	18.0907	-3.07237	0.0063701	0.0937191	NS
let-60	-0.368525	20.4356	-3.069	0.00638383	0.0937191	NS
smg-3	0.215988	18.9651	3.06768	0.00640256	0.0937861	NS
prdx-3	0.29015	22.6161	3.06427	0.0064511	0.0940237	NS
dhs-24	-0.312383	19.4022	-3.06315	0.00646709	0.0940237	NS
C36B7.6	-0.259064	18.3656	-3.06255	0.00647559	0.0940237	NS
isy-1	-0.243906	18.0693	-3.06218	0.00648094	0.0940237	NS
sac-1	-0.256963	18.356	-3.06043	0.00650606	0.0940237	NS
nsun-1	-0.349005	19.0543	-3.06021	0.00650936	0.0940237	NS
C35E7.6	-0.32718	16.5205	-3.05959	0.00651818	0.0940237	NS
lpd-9	-0.555289	18.4178	-3.05985	0.00654943	0.0942691	NS
Y45F3A.9	0.333037	18.1617	3.05115	0.00664109	0.095381	NS
ddx-52	-0.202434	17.3067	-3.04669	0.00670693	0.0959166	NS
trx-4	0.360856	18.6079	3.04652	0.00670946	0.0959166	NS
fut-3	0.268543	19.641	3.04569	0.00672184	0.0959166	NS
F58A6.1	1.3162	17.5708	3.04708	0.00674396	0.0960253	NS
lipt-1	-0.233017	17.3659	-3.03668	0.00685713	0.0974271	NS
F35H10.10	-0.532636	16.2595	-3.03565	0.00688292	0.0975841	NS
T08A11.1	0.269878	20.0859	3.02898	0.00697481	0.0985791	NS
rpoa-1	-0.251001	19.1778	-3.02761	0.00699586	0.0985791	NS
hsp-3	-0.306443	23.3657	-3.02749	0.00699776	0.0985791	NS
ZK1098.3	-0.245192	16.9578	-3.02438	0.00704594	0.0988572	NS
nol-6	-0.278172	17.9247	-3.02429	0.00704736	0.0988572	NS
inx-2	0.512058	19.2293	3.021	0.00713483	0.0994521	NS
emc-2	-0.173979	20.4797	-3.01941	0.00712371	0.0994521	NS
mdt-27	-0.276693	17.2063	-3.01935	0.00712475	0.0994521	NS
taf-6.1	-0.419455	16.5951	-3.01597	0.00717803	0.0998439	NS
hat-1	-0.39852	20.658	-3.01358	0.00721597	0.100161	NS
Y37E3.17	0.280993	21.8358	3.01148	0.00724947	0.100242	NS
K04C2.2	-0.37619	18.572	-3.01132	0.00725203	0.100242	NS
rsbp-1	-0.328111	17.0864	-3.00924	0.00728541	0.100493	NS
pcf-11	-0.22913	18.9921	-3.00759	0.0073121	0.100652	NS
bcat-1	0.793217	16.9154	3.00114	0.0074622	0.102191	NS
gst-1	0.477813	21.2297	2.999	0.00747992	0.102191	NS
F59D12.5	0.381682	16.2656	2.99782	0.00747136	0.102191	NS
bus-5	-1.17482	17.8388	-2.99878	0.00750108	0.102191	NS
lin-66	-0.196423	19.5549	-2.99672	0.00748939	0.102191	NS
popl-1	-0.252114	16.8009	-2.99172	0.00757241	0.102951	NS
smu-1	-0.218579	19.5331	-2.98982	0.00760412	0.10317	NS
uggt-1	-0.201131	20.0067	-2.98101	0.00775321	0.104763	NS
T20B12.7	-0.225342	21.0208	-2.98101	0.00775322	0.104763	NS
bckd-1b	0.366319	17.7665	2.97312	0.00788901	0.106381	NS
F55G11.8	0.538488	16.0329	2.97381	0.00790985	0.106445	NS
prmt-6	-0.495975	15.9164	-2.97003	0.00795923	0.106893	NS
lys-1	0.95957	19.1945	2.96865	0.00801433	0.107077	NS
ddx-27	-0.279644	17.9001	-2.9651	0.0080295	0.107077	NS
cyn-16	0.280852	17.9003	2.96501	0.00803108	0.107077	NS
glrx-22	0.215244	18.1792	2.96463	0.00803768	0.107077	NS
T04B8.5	-0.303064	17.5494	-2.96368	0.00805465	0.107088	NS
zfp-3	-0.257718	17.2057	-2.95669	0.0081793	0.108314	NS
snr-7	-0.385535	17.885	-2.95668	0.00817955	0.108314	NS
rpl-14	-0.195795	23.7299	-2.95418	0.00822457	0.108692	NS
ZK1127.5	-0.304837	17.5111	-2.95144	0.00827428	0.109132	NS
ubh-1	0.356436	17.6863	2.94777	0.0083412	0.109795	NS
F22G12.4	0.221283	23.6386	2.94555	0.00838206	0.110114	NS
F37H8.5	0.483856	21.405	2.94521	0.00842796	0.1104	NS
D1014.5	-0.590029	16.176	-2.94478	0.00843713	0.1104	NS
kdp-1	0.614887	20.0341	2.94374	0.00846417	0.110435	NS
eef-1B.1	0.287779	21.9963	2.94062	0.00847319	0.110435	NS
lbp-3	0.420184	19.2211	2.93587	0.00856203	0.111374	NS
Y47G6A.21	0.374468	19.2767	2.93314	0.00861354	0.111729	NS
dhs-6	0.35192	21.0808	2.93263	0.0086231	0.111729	NS
C52B9.4	-0.257848	18.3371	-2.93011	0.00867086	0.112128	NS
sop-3	-0.194954	17.2537	-2.92747	0.00872138	0.112562	NS
Y48B6A.1	-0.344029	17.608	-2.926	0.00874943	0.112582	NS
emb-4	-0.216278	21.2205	-2.92561	0.00875691	0.112582	NS
rpl-30	-0.32302	23.6303	-2.91707	0.00892246	0.114483	NS
Y17G7B.12	-0.303985	16.516	-2.9159	0.00894531	0.114483	NS
nhl-2	0.195412	18.6295	2.91532	0.00895664	0.114483	NS
tag-52	0.321387	17.7796	2.90896	0.00908231	0.115865	NS
cup-14	0.22959	16.7378	2.90636	0.00913421	0.116303	NS
cuc-1	0.802893	19.3412	2.90242	0.00926471	0.117362	NS
Y39A1C.1	-0.261781	15.5866	-2.90081	0.00924596	0.117362	NS
asd-2	-0.519604	17.5761	-2.90005	0.00928426	0.117362	NS
mrps-22	-0.198321	19.5635	-2.89872	0.00928829	0.117362	NS
tag-307	0.229985	16.9792	2.89728	0.00931767	0.117397	NS
hsp-60	0.281794	23.4732	2.89684	0.00932651	0.117397	NS
fum-1	0.224034	21.9802	2.89339	0.00939734	0.118064	NS
cisd-1	0.311893	21.3922	2.88474	0.00957663	0.120089	NS
Y41E3.1	-0.359237	18.7082	-2.88378	0.00959669	0.120113	NS
elo-6	1.75457	16.9435	2.88448	0.00963463	0.12036	NS
enol-1	0.268648	23.7047	2.88101	0.00965517	0.12039	NS
tcc-1	0.38456	22.7894	2.87658	0.00974974	0.121116	NS
ari-1.2	-0.359397	19.7254	-2.87653	0.00975003	0.121116	NS
ZK632.9	0.368275	20.5403	2.8741	0.00980187	0.121532	NS
smg-5	0.364592	17.1374	2.8715	0.00985768	0.121996	NS
attf-4	-0.240873	17.0706	-2.86515	0.00999534	0.123469	NS
C01G5.5	0.409868	18.507	2.86054	0.0100964	0.124298	NS
rde-11	0.382555	17.026	2.86037	0.0101001	0.124298	NS
M04B2.2	0.268649	15.9801	2.85517	0.0102153	0.125483	NS
NA	0.626729	21.0488	2.85145	0.0103532	0.126942	NS
gyf-1	1.25065	15.8366	2.84724	0.0104483	0.127871	NS
tres-1	0.299296	17.8512	2.84266	0.0104977	0.127904	NS
pygl-1	-0.173104	23.2014	-2.84199	0.010513	0.127904	NS
rbc-1	0.241966	17.1473	2.84183	0.0105166	0.127904	NS
dph-7	0.459379	16.7013	2.84132	0.0105283	0.127904	NS
mans-3	-0.234661	15.9384	-2.83865	0.0105899	0.128417	NS
wah-1	0.233941	20.114	2.83581	0.0106553	0.128895	NS
F48E8.3	0.250324	21.3143	2.83526	0.0106683	0.128895	NS
col-166	-1.0501	17.1858	-2.83591	0.0107088	0.129126	NS
D1022.4	-0.464401	18.019	-2.83333	0.0107264	0.129126	NS
cnt-1	-0.228144	17.8959	-2.82445	0.0109222	0.131244	NS
tag-267	-0.364461	17.4591	-2.82345	0.0109459	0.131291	NS
tbca-1	0.313739	17.9098	2.8217	0.0109876	0.131553	NS
rpl-28	-0.22288	22.5762	-2.81842	0.0110661	0.132254	NS
ZK1307.8	0.208435	21.0877	2.81436	0.0111642	0.133186	NS
vps-29	0.233098	19.866	2.81292	0.0111994	0.133328	NS
rnf-121	-0.310468	16.4016	-2.81222	0.0112164	0.133328	NS
dom-3	0.249254	17.0692	2.81046	0.0112592	0.133598	NS
Y66H1A.4	-0.344772	17.8665	-2.80815	0.0113158	0.133814	NS
smi-1	0.304412	17.4282	2.80782	0.0113241	0.133814	NS
nurf-1	0.174057	18.2404	2.80725	0.0113381	0.133814	NS
ags-3	-0.365207	17.2573	-2.80633	0.0113609	0.133844	NS
mrps-5	-0.207403	19.7296	-2.80427	0.0114118	0.134205	NS
ech-8	0.754863	16.9955	2.80517	0.0114472	0.134299	NS
pfkb-1.2	0.220088	16.8333	2.80231	0.0114604	0.134299	NS
sdz-27	0.547686	17.2865	2.80173	0.0115219	0.134677	NS
vbh-1	-0.356624	20.8453	-2.79939	0.0115333	0.134677	NS
T20F7.1	0.249131	17.4997	2.79762	0.0115775	0.134955	NS
hmt-1	0.231637	17.9658	2.79568	0.0116263	0.13502	NS
daf-8	-0.218189	17.0325	-2.79538	0.0116341	0.13502	NS
F52E1.14	-0.275133	15.4404	-2.79497	0.0116442	0.13502	NS
F37A4.5	0.644218	16.0522	2.79223	0.0117724	0.13603	NS
F30A10.9	-0.411162	16.8284	-2.79018	0.0117661	0.13603	NS
brap-2	-0.238627	17.9105	-2.78823	0.0118159	0.136295	NS
afmd-2	0.29853	16.3416	2.78325	0.011944	0.137533	NS
F18C12.3	-0.233635	17.3844	-2.7823	0.0119686	0.137576	NS
sut-2	-0.201166	18.9124	-2.78116	0.0119981	0.137676	NS
C45G9.5	-0.221609	17.7452	-2.78028	0.012021	0.1377	NS
W07E6.2	-0.242878	18.1641	-2.77853	0.0120668	0.137987	NS
oxa-1	-0.537703	17.8152	-2.77753	0.0121431	0.13862	NS
dpyd-1	-0.362185	18.3336	-2.77428	0.0121783	0.138782	NS
C37H5.13	0.555378	17.9401	2.77525	0.0122047	0.138844	NS
ruvb-1	-0.160505	21.7916	-2.7718	0.012244	0.139052	NS
hpo-32	0.746171	16.867	2.77074	0.012332	0.13948	NS
Y59A8B.8	0.207796	19.7776	2.76929	0.0123107	0.13948	NS
eif-3.H	-0.161245	21.1301	-2.76677	0.0123778	0.13948	NS
pmk-1	-0.28184	17.4494	-2.76652	0.0123844	0.13948	NS
mrps-26	-0.18825	18.9548	-2.76643	0.012387	0.13948	NS
pot-1	1.06568	16.9836	2.76634	0.0124499	0.139713	NS
pad-2	0.346276	16.9371	2.7646	0.0124361	0.139713	NS
fars-3	-0.282747	21.4397	-2.76148	0.0125204	0.140267	NS
npp-25	0.235451	20.4403	2.76008	0.0125584	0.140454	NS
F45H10.2	0.271066	21.7069	2.75414	0.0127207	0.142009	NS
tag-151	-0.405468	18.454	-2.75306	0.0127503	0.142009	NS
ric-3	-0.36086	16.1188	-2.75265	0.0127617	0.142009	NS
sqv-8	0.289921	16.2818	2.75004	0.0128339	0.142572	NS
hpo-11	-0.178375	17.9432	-2.74359	0.0130138	0.143762	NS
C18E9.2	-0.3439	18.6478	-2.74307	0.0130284	0.143762	NS
npp-21	0.1834	21.0211	2.74282	0.0130353	0.143762	NS
rpl-33	-0.148882	23.1048	-2.74281	0.0130357	0.143762	NS
acdh-12	0.222638	23.4993	2.74207	0.0130565	0.143762	NS
C28H8.3	-0.221982	21.9454	-2.74155	0.0130713	0.143762	NS
hlh-1	-0.23092	17.187	-2.74075	0.0130938	0.143771	NS
F33D4.6	-0.644318	19.8618	-2.74142	0.013137	0.144007	NS
Y57A10A.27	-0.266599	18.4348	-2.73482	0.0132623	0.14514	NS
brf-1	-0.251321	17.6484	-2.7331	0.0133117	0.145441	NS
letm-1	0.217029	18.9384	2.73158	0.0133553	0.145676	NS
akt-1.1	0.220538	19.6178	2.72865	0.0134401	0.14636	NS
F54B8.4	0.88621	15.8614	2.7296	0.0134754	0.146504	NS
mdt-11	0.292262	17.622	2.72645	0.013504	0.146574	NS
D1046.2	0.369747	16.938	2.72538	0.013535	0.14667	NS
far-3	1.36001	18.6959	2.72356	0.0136516	0.147261	NS
ddx-17	-0.308942	21.0663	-2.72223	0.0136272	0.147261	NS
hch-1	0.556969	20.2483	2.7234	0.0136563	0.147261	NS
C26F1.3	-0.235023	15.7311	-2.71881	0.013728	0.147707	NS
alkb-7	0.293626	16.4445	2.71833	0.0137422	0.147707	NS
wdr-4	-0.258825	21.1379	-2.71511	0.0138377	0.148492	NS
cogc-8	-0.203015	17.49	-2.71416	0.013866	0.148555	NS
F13B6.1	0.455161	16.042	2.71273	0.013924	0.148746	NS
mbk-2	0.41704	17.8356	2.71206	0.0139288	0.148746	NS
trpp-4	0.193558	17.7547	2.71074	0.0139685	0.148929	NS
F39C12.1	-0.250428	16.623	-2.70764	0.0140621	0.149687	NS
syf-1	-0.175454	19.6304	-2.70418	0.0141671	0.150563	NS
Y45G12B.3	-0.358443	18.6863	-2.70143	0.014251	0.151211	NS
ipgm-1.1	0.635932	16.4616	2.70089	0.0143325	0.151282	NS
ubc-9	0.319816	20.0576	2.69895	0.0143272	0.151282	NS
dre-1	-0.241902	15.7978	-2.69855	0.0143395	0.151282	NS
btbd-10	-0.284329	16.8945	-2.69801	0.0143563	0.151282	NS
ubc-15	-0.334203	18.5191	-2.6975	0.0143719	0.151282	NS
crn-5	-0.252491	17.3203	-2.69508	0.014447	0.151831	NS
T12D8.10	0.337229	18.6486	2.69328	0.0145029	0.152177	NS
F15B10.3	-0.383151	17.1889	-2.69116	0.0145691	0.15263	NS
F59C12.3	-0.175393	16.2151	-2.69009	0.0146026	0.152739	NS
capg-1	0.187734	19.5858	2.68881	0.0146426	0.152745	NS
ephx-1	-0.226122	15.4591	-2.68798	0.0146689	0.152745	NS
sart-1	-0.17592	18.4327	-2.68632	0.0147213	0.152745	NS
dhs-11	0.306071	20.5666	2.68624	0.0147236	0.152745	NS
F23H11.5	0.421801	18.2318	2.68571	0.0147531	0.152745	NS
F54B3.1	0.192858	17.0959	2.68507	0.0147608	0.152745	NS
casc-3	-0.359337	18.719	-2.68495	0.0147647	0.152745	NS
prp-21	-0.211718	20.2823	-2.68306	0.0148244	0.15293	NS
ddx-10	-0.253302	17.602	-2.68293	0.0148287	0.15293	NS
fem-1	-0.168481	16.1055	-2.67915	0.0149493	0.153933	NS
F19B6.1	-0.213961	19.4968	-2.67803	0.0149854	0.154065	NS
mrpl-41	-0.203908	19.5984	-2.67564	0.0150625	0.154605	NS
C01A2.4	0.319645	17.4246	2.67495	0.0150846	0.154605	NS
gpd-2	0.800842	22.0313	2.67543	0.0151359	0.154685	NS
wts-1	-0.220414	16.6797	-2.67327	0.0151391	0.154685	NS
let-630	-0.158015	20.2829	-2.66977	0.015253	0.155523	NS
szy-2	0.266442	19.4279	2.6693	0.0152686	0.155523	NS
T23G5.2	0.310573	19.4843	2.66859	0.0152916	0.155523	NS
fask-1	0.240179	18.074	2.66631	0.0153667	0.156047	NS
maoc-1	0.727528	20.1207	2.66678	0.0154185	0.156094	NS
R53.5	0.38489	19.9754	2.66422	0.0154403	0.156094	NS
ugt-23	-0.316616	18.7815	-2.66402	0.015442	0.156094	NS
mca-3	-0.578387	18.4757	-2.66429	0.0155007	0.15621	NS
pigv-1	-0.295584	18.4839	-2.66273	0.015485	0.15621	NS
gro-1	0.288127	17.613	2.66014	0.015571	0.156681	NS
C01G6.3	0.272229	22.2481	2.65817	0.0156366	0.157044	NS
Y82E9BR.17	-0.389405	16.3373	-2.65764	0.0156545	0.157044	NS
pcca-1	0.225166	21.6319	2.65336	0.0157986	0.158021	NS
ric-8	-0.263036	18.806	-2.65332	0.0157997	0.158021	NS
lsm-4	0.244358	19.3697	2.65243	0.0158298	0.158083	NS
wrt-10	0.522719	18.9663	2.65309	0.015876	0.158291	NS
dpy-1	-0.378134	16.2446	-2.65041	0.0158984	0.158291	NS
rps-10	0.523349	23.3595	2.64797	0.0160504	0.159322	NS
sip-1	0.380727	23.8553	2.64571	0.0160872	0.159322	NS
sups-1	-0.335175	15.9199	-2.64384	0.0161235	0.159322	NS
epg-6	-0.265715	18	-2.64373	0.016127	0.159322	NS
C34E10.10	-0.329106	16.8919	-2.64321	0.0161452	0.159322	NS
utp-20	-0.220023	17.0338	-2.64317	0.0161463	0.159322	NS
Y47G6A.7	-0.193933	15.7507	-2.64158	0.0162014	0.159627	NS
bca-2	-0.333599	16.0251	-2.64054	0.0162374	0.159742	NS
fan-1	0.356599	17.6262	2.63985	0.0162613	0.159742	NS
ttr-24	0.539262	19.8426	2.64003	0.0163246	0.159889	NS
gpcp-2	-0.228586	16.7341	-2.63823	0.0163176	0.159889	NS
F22D6.2	-0.414433	18.3334	-2.63162	0.016566	0.162014	NS
fbxc-39	0.289942	18.2346	2.6271	0.0167099	0.16318	NS
nspg-4	-0.396367	16.0146	-2.62451	0.0168027	0.163844	NS
fkb-5	-0.580186	20.7628	-2.62517	0.0168495	0.163992	NS
selt-1.1	0.375543	19.3459	2.6223	0.0168818	0.163992	NS
F58B3.4	-0.224087	16.4815	-2.62156	0.0169087	0.163992	NS
crn-1	0.320096	19.5048	2.62069	0.01694	0.163992	NS
erm-1	0.895747	18.7186	2.6218	0.0169707	0.163992	NS
mak-2	-0.242779	17.1598	-2.62013	0.0169602	0.163992	NS
T19C3.5	0.393135	18.0393	2.61921	0.0169934	0.163992	NS
C37C3.2	0.203249	20.6033	2.61802	0.0170367	0.163992	NS
rbd-1	-0.238351	17.8922	-2.61734	0.0170613	0.163992	NS
F10G7.10	-0.151851	17.9582	-2.61722	0.0170655	0.163992	NS
T08G5.3	-0.433928	15.7588	-2.61586	0.0171519	0.164583	NS
slc-17.7	-0.225132	16.1385	-2.61263	0.0172334	0.165126	NS
F53G2.12	0.244251	18.7916	2.61125	0.017284	0.165354	NS
F26G1.1	-0.163514	17.0559	-2.61036	0.0173168	0.165354	NS
C27H6.8	-0.285091	19.6185	-2.60995	0.0173321	0.165354	NS
F41G3.3	-0.220444	15.4236	-2.60716	0.017435	0.166097	NS
hxk-1	0.489496	16.989	2.6068	0.017478	0.166267	NS
faah-4	0.280038	19.0828	2.60402	0.0175521	0.166567	NS
pfk-1.1	0.190421	20.5944	2.60323	0.0175817	0.166567	NS
Y22D7AL.9	-0.260173	15.8285	-2.60279	0.0175981	0.166567	NS
F35E12.2	-0.436217	16.3145	-2.60192	0.0176314	0.166567	NS
T05F1.4	0.269474	17.6486	2.60179	0.0176354	0.166567	NS
cpg-20	0.353069	16.3431	2.59928	0.01773	0.167223	NS
smg-2	0.230494	18.9541	2.59839	0.0177636	0.167301	NS
ccar-1	-0.19955	19.6952	-2.59727	0.0178057	0.167317	NS
ZK858.6	-0.194324	18.9494	-2.59701	0.0178159	0.167317	NS
F44E2.3	-0.229517	17.3668	-2.59546	0.0178745	0.167454	NS
mab-31	-0.364755	16.4845	-2.59529	0.0178809	0.167454	NS
csn-2	0.153924	20.4022	2.59441	0.0179145	0.167479	NS
F39G3.3	0.273813	16.59	2.59358	0.017946	0.167479	NS
ostb-1	-0.170724	22.5237	-2.59299	0.0179686	0.167479	NS
oxi-1	-0.220042	15.8294	-2.59256	0.0179849	0.167479	NS
syx-6	-0.395591	16.0673	-2.5907	0.018056	0.167906	NS
rab-6.2	-0.259283	18.7391	-2.58851	0.0181405	0.168404	NS
ttb-1	0.328881	18.4804	2.58799	0.0181605	0.168404	NS
K04C1.2	-0.167096	15.6235	-2.58607	0.0182345	0.168633	NS
F27C1.2	0.359357	17.1357	2.58586	0.0182428	0.168633	NS
F36A2.2	-0.242907	16.4391	-2.58538	0.0182615	0.168633	NS
gpi-1	0.509676	20.0893	2.58574	0.0183208	0.168945	NS
dex-1.1	-0.531208	17.2558	-2.58435	0.0183631	0.168992	NS
acs-13	-0.226877	21.0066	-2.58185	0.0183987	0.168992	NS
algn-10	0.244884	17.7177	2.58137	0.0184174	0.168992	NS
gbf-1	-0.142282	18.9599	-2.5811	0.018428	0.168992	NS
F54D5.7	0.227174	20.2035	2.58034	0.0184579	0.169031	NS
ZK858.7	-0.18126	17.7925	-2.57599	0.0186287	0.170149	NS
F54C8.4	-0.204253	18.7909	-2.57593	0.0186314	0.170149	NS
C10G8.8	-0.262339	15.7526	-2.57422	0.0186988	0.17053	NS
unc-129	-0.225392	16.6887	-2.57232	0.0187743	0.170969	NS
zhit-3	-0.283272	18.0791	-2.57171	0.0187985	0.170969	NS
F27D4.1	0.250084	23.114	2.57065	0.0188408	0.171118	NS
cids-1	-0.216728	17.9501	-2.56934	0.0188931	0.171256	NS
ZC247.2	-0.33003	15.9412	-2.56838	0.0189317	0.171256	NS
mtm-9	0.391735	17.8334	2.56833	0.0189336	0.171256	NS
T06E6.1	-0.233882	16.7074	-2.56678	0.0189959	0.171585	NS
Y54G9A.9	1.71009	17.2102	2.56766	0.0190355	0.171705	NS
eif-2A	-0.391428	20.8722	-2.56554	0.019068	0.171705	NS
cyn-8	-0.223789	18.77	-2.56452	0.019087	0.171705	NS
F58B3.6	0.204255	17.8977	2.56075	0.0192402	0.172849	NS
cest-25	0.482436	18.2348	2.5591	0.0193707	0.173563	NS
Y46E12BL.2	-0.276189	18.4744	-2.55752	0.0193722	0.173563	NS
cri-3	0.411136	20.74	2.55656	0.0194581	0.174097	NS
twk-18	-0.589877	16.68	-2.55353	0.0196052	0.175172	NS
gtf-2f1	0.246108	18.6686	2.55076	0.0196513	0.175172	NS
him-1	0.165858	20.0592	2.54997	0.0196839	0.175172	NS
K07C5.3	0.236909	17.4115	2.54955	0.0197016	0.175172	NS
K07C5.2	0.35534	18.9648	2.54851	0.0197448	0.175172	NS
sdz-4	-0.379759	16.4747	-2.54845	0.0197475	0.175172	NS
C26B2.7	-0.192497	16.8912	-2.54807	0.0197634	0.175172	NS
B0281.5	-0.390908	16.7564	-2.53995	0.0201053	0.177964	NS
chil-10	0.339425	20.5873	2.53843	0.0201697	0.178296	NS
lap-2	0.185353	21.9157	2.5368	0.0202395	0.178674	NS
gly-5	-0.220492	17.4602	-2.53495	0.0203184	0.178955	NS
rsu-1	-0.401759	17.0439	-2.53479	0.0203253	0.178955	NS
T01G5.1	-0.723603	18.5146	-2.53512	0.0203884	0.179034	NS
ceh-58	-0.236353	16.1202	-2.5337	0.0203721	0.179034	NS
F54E12.2	0.448641	17.4995	2.53003	0.0205597	0.180274	NS
tln-1	-0.759588	16.8479	-2.53054	0.0205862	0.180274	NS
F56B3.11	-0.18673	19.2339	-2.52817	0.0206113	0.180274	NS
ulp-1	0.224383	18.0101	2.52472	0.0207615	0.181275	NS
ent-5	0.451539	17.3874	2.52492	0.0207805	0.181275	NS
Y43B11AR.3	0.201232	16.5723	2.52248	0.0208598	0.181727	NS
gtf-2H2C	0.23445	17.2703	2.51883	0.0210209	0.182315	NS
Y54E10A.6	-0.192717	18.8972	-2.51793	0.0210607	0.182315	NS
F08F1.4	-0.301509	15.5501	-2.51768	0.0210721	0.182315	NS
rev-3	0.638016	15.9663	2.51857	0.0211111	0.182315	NS
D2023.4	0.513476	18.2148	2.51846	0.0211085	0.182315	NS
baz-2	0.211859	18.046	2.51742	0.0210833	0.182315	NS
Y55F3BR.2	-0.326758	15.8278	-2.51636	0.0211305	0.182315	NS
phb-2	0.199472	22.7722	2.51598	0.0211476	0.182315	NS
vha-4	-0.170364	16.221	-2.51479	0.0212006	0.182399	NS
Y53C12B.1	-0.283681	18.1236	-2.51452	0.0212124	0.182399	NS
mdt-26	-0.279496	18.8267	-2.51364	0.0212517	0.1825	NS
zipt-15	0.542322	17.196	2.51171	0.021407	0.183077	NS
xdh-1	0.525216	17.4644	2.51078	0.0214487	0.183077	NS
smg-7	0.250177	17.0916	2.50942	0.0214412	0.183077	NS
metl-6	0.202237	18.3352	2.50907	0.0214571	0.183077	NS
dhp-2	-0.384395	17.884	-2.50907	0.0214572	0.183077	NS
spds-1	-0.456491	17.4062	-2.50453	0.0216977	0.184601	NS
repo-1	-0.175327	17.481	-2.50374	0.0216991	0.184601	NS
rpom-1	0.224042	17.4802	2.5033	0.0217194	0.184601	NS
T02H6.11	0.401194	19.3218	2.50024	0.0218935	0.185552	NS
T24A6.20	-0.273341	17.4854	-2.49963	0.0218871	0.185552	NS
ccm-3	0.188261	18.7232	2.49737	0.0219914	0.185552	NS
hpo-18	0.279069	21.9369	2.49725	0.0219971	0.185552	NS
marb-1	0.389163	19.0778	2.497	0.0220274	0.185552	NS
Y50D4C.3	0.170681	18.0204	2.49676	0.0220195	0.185552	NS
daf-4	-0.153433	16.8918	-2.49664	0.0220251	0.185552	NS
lrk-1	-0.158781	16.7633	-2.4951	0.0220968	0.185607	NS
smg-9	0.241989	17.895	2.49495	0.0221037	0.185607	NS
mca-1	-0.215541	17.5372	-2.49464	0.0221181	0.185607	NS
C18A3.3	-0.269346	18.2219	-2.49191	0.0222449	0.185998	NS
dsh-2	0.293102	17.627	2.49091	0.0222919	0.185998	NS
tre-3	-0.416228	15.67	-2.49148	0.0223269	0.185998	NS
acbp-1	0.484054	21.1542	2.49132	0.0223533	0.185998	NS
raga-1	0.272259	20.22	2.48987	0.0223403	0.185998	NS
R10D12.13	-0.337687	16.5817	-2.48971	0.0223481	0.185998	NS
nol-56	-0.360902	21.8629	-2.48983	0.0223613	0.185998	NS
D1007.10	0.287362	16.0302	2.48711	0.0224702	0.186669	NS
C42D4.1	-0.636251	20.629	-2.48671	0.0225703	0.186768	NS
T23E7.2	-0.755692	17.4161	-2.48655	0.0225774	0.186768	NS
egal-1	-0.349624	16.9517	-2.48544	0.0225491	0.186768	NS
imp-2	-0.294923	20.0986	-2.48402	0.0226164	0.186768	NS
lst-4	0.210873	17.6088	2.48388	0.0226231	0.186768	NS
Y37D8A.19	0.669715	16.7547	2.48387	0.0227045	0.187206	NS
Y40B1B.7	-0.341406	16.1048	-2.48062	0.022778	0.187442	NS
C25H3.14	0.94662	17.2341	2.48113	0.0228351	0.187442	NS
glh-3	0.596175	17.8556	2.4809	0.0228463	0.187442	NS
Y22D7AL.10	0.245128	23.9849	2.47964	0.0228251	0.187442	NS
ccep-97	0.447934	18.4375	2.47818	0.0229627	0.187992	NS
wht-1	-0.216585	15.6578	-2.47661	0.0229702	0.187992	NS
tmem-24	-0.219018	15.4979	-2.47326	0.0231321	0.189061	NS
exc-7	-0.329315	16.6177	-2.47273	0.023158	0.189061	NS
set-10	-0.259463	17.5933	-2.47189	0.0231984	0.189158	NS
ugt-29	0.733682	15.9858	2.47226	0.0232626	0.189216	NS
cst-1	-0.295149	18.8168	-2.47074	0.0232545	0.189216	NS
wago-1	-0.279496	19.6298	-2.46694	0.0234401	0.190426	NS
snx-13	-0.164146	16.0135	-2.46604	0.0234842	0.19055	NS
rsp-5	0.391021	16.7621	2.46538	0.0235168	0.190581	NS
ncbp-2	-0.187011	18.595	-2.46227	0.0236702	0.191326	NS
unc-51	-0.18104	17.4305	-2.46198	0.0236848	0.191326	NS
F25H2.6	-0.184574	17.4576	-2.46176	0.0236954	0.191326	NS
gos-28	-0.235612	17.7824	-2.45911	0.023827	0.191904	NS
pqn-70	-0.306286	17.8104	-2.45901	0.0238323	0.191904	NS
snrp-27	0.23063	17.2866	2.45825	0.0238699	0.191904	NS
ubc-26	0.273389	16.5466	2.45799	0.0238829	0.191904	NS
F46B6.12	0.345978	18.1601	2.45259	0.0241538	0.193845	NS
rpoa-2	-0.253323	18.5216	-2.45069	0.0242498	0.19438	NS
F17E9.4	0.591234	16.3872	2.45103	0.0243162	0.194442	NS
unc-45	-0.287447	19.6268	-2.44942	0.0243143	0.194442	NS
W05B5.1	-0.573739	17.1145	-2.44338	0.0247072	0.196555	NS
ttr-25	0.519076	18.9547	2.44324	0.0247143	0.196555	NS
immp-2	-0.200283	16.5169	-2.44207	0.02469	0.196555	NS
romo-1	0.32647	18.9792	2.44199	0.0246944	0.196555	NS
cyp-31a2	0.44658	19.9231	2.44225	0.0247542	0.196555	NS
hpd-1	0.780174	18.1495	2.44215	0.0247704	0.196555	NS
W04C9.4	-0.24991	18.0858	-2.44016	0.0247884	0.196555	NS
nucl-1	-0.319291	20.0729	-2.43926	0.0248351	0.19669	NS
ZC434.8	0.380936	23.3391	2.43669	0.0250378	0.198059	NS
nsun-5	-0.203607	16.5133	-2.43058	0.0252882	0.199498	NS
M01F1.3	-0.200126	15.8697	-2.43003	0.0253174	0.199498	NS
usp-33	0.291683	16.0616	2.42975	0.0253321	0.199498	NS
obr-3	-0.180652	17.0955	-2.4296	0.0253403	0.199498	NS
R06F6.12	0.191641	17.5342	2.42837	0.0254052	0.199668	NS
eif-3.K	-0.194971	21.667	-2.42805	0.0254221	0.199668	NS
prp-18	-0.186462	18.7138	-2.42642	0.0255082	0.199961	NS
ttc-1	0.290367	17.2704	2.4262	0.0255199	0.199961	NS
jmjd-2	-0.259039	17.5309	-2.42453	0.025609	0.200422	NS
C56A3.6	-0.290761	16.6835	-2.42258	0.0257128	0.200769	NS
coq-5	0.182379	18.3318	2.42172	0.0257589	0.200769	NS
coa-6	1.18367	17.1472	2.42151	0.0258564	0.200769	NS
ZK792.5	-0.229886	17.9089	-2.42053	0.0258229	0.200769	NS
evl-14	0.138303	19.3254	2.42041	0.0258295	0.200769	NS
Y41E3.7	-0.195867	18.7709	-2.42008	0.0258471	0.200769	NS
K12D12.5	-0.37514	16.1411	-2.41973	0.0258656	0.200769	NS
thoc-3	0.196191	17.6734	2.41546	0.0260963	0.202237	NS
gly-20	-0.251344	16.7084	-2.4151	0.0261158	0.202237	NS
gpap-1	-0.316577	16.5916	-2.4122	0.0262737	0.203222	NS
crn-4	0.242049	18.1093	2.40928	0.0264336	0.20422	NS
hpo-12	-0.44231	16.9227	-2.40889	0.0264757	0.204307	NS
bre-1.1	-0.627346	17.735	-2.40742	0.026623	0.20451	NS
K02F6.7	0.274993	18.2054	2.40651	0.026586	0.20451	NS
R07E5.1	0.241282	17.3032	2.40588	0.0266207	0.20451	NS
nol-58	-0.309489	21.3086	-2.40579	0.0266256	0.20451	NS
pinn-4	0.471071	18.6107	2.403	0.0268598	0.20607	NS
Y71G10AR.4	0.671608	19.5346	2.40245	0.0268981	0.206126	NS
F01F1.15	0.263411	19.3802	2.40029	0.0269314	0.206142	NS
yop-1	0.429883	22.4887	2.39998	0.0270284	0.20646	NS
alh-1	0.219372	22.2974	2.39843	0.0270353	0.20646	NS
nsy-7	-0.194756	15.8299	-2.39625	0.0271577	0.207155	NS
sgo-1	0.330591	17.0561	2.39567	0.0271901	0.207164	NS
F44G4.3	-0.197134	16.4706	-2.39502	0.0272269	0.207206	NS
sgt-1	0.378967	21.9468	2.39507	0.027293	0.207222	NS
pfn-1	0.196565	23.2149	2.3944	0.027262	0.207222	NS
adsl-1	0.214286	20.6119	2.39328	0.0273255	0.207222	NS
rnp-3	-0.177201	20.9697	-2.39277	0.0273542	0.207222	NS
hmgr-1	0.213791	16.4466	2.39007	0.0275075	0.208145	NS
K02B7.3	0.393908	16.8553	2.3883	0.0276088	0.208673	NS
npp-16	-0.228357	20.3516	-2.38744	0.0276578	0.208805	NS
pqn-27	-0.191836	19.5569	-2.38569	0.0277579	0.209224	NS
hsp-16.1	2.00701	19.8571	2.38642	0.0278048	0.209224	NS
Y39A1A.20	-0.342265	16.1168	-2.38482	0.0278081	0.209224	NS
Y43F8C.13	-0.236821	17.9338	-2.38259	0.0279369	0.209701	NS
scp-1	0.373217	17.3062	2.38209	0.0279655	0.209701	NS
alh-9	-0.305821	21.4193	-2.38208	0.0279664	0.209701	NS
csn-1	0.191254	20.5528	2.38138	0.028007	0.209768	NS
F25E5.1	-0.196366	16.844	-2.37943	0.0281198	0.210375	NS
mca-3	-0.215163	20.0482	-2.37805	0.0282005	0.21074	NS
F44G4.2	-0.397629	17.5527	-2.37636	0.0283202	0.211396	NS
mthf-1	-0.52072	18.3881	-2.37552	0.0284375	0.211824	NS
tin-10	0.248967	18.9071	2.37393	0.0284415	0.211824	NS
rbm-5	0.426281	17.5938	2.37057	0.0286857	0.213163	NS
mai-2	0.228555	23.042	2.37015	0.0286643	0.213163	NS
rrp-1	-0.290295	17.2988	-2.3691	0.0287266	0.213228	NS
efhd-1	0.535215	18.327	2.36982	0.0287736	0.213337	NS
Y71H2B.4	0.665796	17.3971	2.3678	0.0288935	0.213669	NS
nhr-1	-0.28449	16.3918	-2.36669	0.0288701	0.213669	NS
T25B9.9	0.280077	21.3281	2.36593	0.0289152	0.213669	NS
C23G10.2	0.324711	19.853	2.36318	0.0290799	0.214647	NS
yju-2	-0.233953	17.6533	-2.36248	0.0291215	0.214715	NS
T09F3.4	0.685344	16.7682	2.36064	0.0293229	0.215662	NS
nra-4	-0.129861	21.5683	-2.35888	0.0293387	0.215662	NS
lit-1	-0.256318	18.5135	-2.35873	0.0293478	0.215662	NS
ttr-16	-0.577338	20.3521	-2.35726	0.0295279	0.216745	NS
F52B11.2	-0.330632	19.6698	-2.35445	0.0296075	0.217089	NS
C35D10.5	0.207281	17.684	2.35281	0.0297077	0.217582	NS
atm-1	0.227205	18.3642	2.35202	0.0297563	0.217698	NS
nduo-5	-0.769222	18.0058	-2.35044	0.0299443	0.218832	NS
ehbp-1	-0.16999	17.543	-2.34832	0.0299838	0.218857	NS
vang-1	0.211129	21.179	2.34783	0.030014	0.218857	NS
ptc-3	-0.585006	17.0617	-2.34812	0.0300877	0.218924	NS
taap-1	0.273625	19.0412	2.34661	0.0300892	0.218924	NS
F22B8.7	0.231884	18.1653	2.34507	0.0301852	0.219381	NS
sup-26	-0.288889	17.8023	-2.33988	0.0305091	0.221368	NS
ges-1	0.318664	16.4775	2.33962	0.0305254	0.221368	NS
F40A3.2	-0.30858	15.853	-2.33823	0.0306127	0.221636	NS
C27B7.2	0.420613	17.4989	2.33825	0.030649	0.221636	NS
patr-1	-0.199494	18.8798	-2.33737	0.0306669	0.221636	NS
F17A9.4	-0.316734	18.6489	-2.3369	0.0306963	0.221636	NS
mif-2	0.499479	19.1736	2.33545	0.0308803	0.222165	NS
kin-29	-0.243305	15.7961	-2.33381	0.0308918	0.222165	NS
C38H2.2	-0.370925	16.3877	-2.33358	0.0309065	0.222165	NS
M04B2.4	0.170732	17.5193	2.33293	0.0309475	0.222165	NS
Y45F10B.13	-0.356691	15.8338	-2.33292	0.0309614	0.222165	NS
D2096.12	0.260932	16.5883	2.33209	0.0310014	0.222165	NS
ect-2	0.299299	17.7935	2.33204	0.0310045	0.222165	NS
C05G5.3	-0.167704	15.6372	-2.32985	0.0311438	0.222922	NS
C13B9.2	0.244064	16.9082	2.32766	0.0312842	0.223533	NS
prpf-4	0.139668	18.6102	2.32747	0.0312967	0.223533	NS
C36A4.4	0.307254	19.8273	2.3265	0.0313587	0.223735	NS
xpc-1	0.411942	22.5116	2.32637	0.0314517	0.224157	NS
cux-7	-0.23949	17.1885	-2.32304	0.0315821	0.224844	NS
aars-2	0.179877	21.7118	2.3219	0.0316558	0.224908	NS
clpp-1	0.224721	18.4182	2.32185	0.0316591	0.224908	NS
M106.8	0.443923	17.9653	2.32113	0.0317849	0.225319	NS
eif-2d	0.187662	18.8923	2.32014	0.0317703	0.225319	NS
sca-1	-0.223349	22.2859	-2.31826	0.0318934	0.225846	NS
ZK1073.1	0.397103	20.905	2.31646	0.032089	0.226989	NS
C35E7.5	-0.423716	19.302	-2.31469	0.0322091	0.22736	NS
ssb-1	-0.328995	21.4723	-2.31364	0.0322103	0.22736	NS
Y105E8B.9	-0.411053	16.3934	-2.31261	0.0322869	0.227578	NS
F13D2.1	0.693964	18.4133	2.31163	0.0324233	0.227578	NS
F52C12.6	0.214689	17.722	2.3089	0.0325102	0.227578	NS
C50F4.6	0.384263	17.236	2.30875	0.0325209	0.227578	NS
F33G12.3	0.198902	17.8999	2.30843	0.0325413	0.227578	NS
Y73B3A.4	-0.265456	15.544	-2.30794	0.0325743	0.227578	NS
K11D12.7	-0.247723	16.6429	-2.30787	0.0325791	0.227578	NS
smk-1	-0.182312	18.939	-2.30772	0.032589	0.227578	NS
ntl-4	-0.199641	18.0841	-2.30749	0.0326044	0.227578	NS
D2030.8	-0.273555	16.4183	-2.30713	0.0326284	0.227578	NS
COX2-ctc.2	0.538585	21.0107	2.30771	0.0326844	0.227578	NS
ptr-21	-0.450844	16.4765	-2.30661	0.0327223	0.227578	NS
Y74C10AL.2	-0.275038	17.2307	-2.30617	0.0326925	0.227578	NS
ugt-48	-0.347227	16.4103	-2.30617	0.0326926	0.227578	NS
gyg-2	0.390459	19.7215	2.30479	0.0328617	0.228069	NS
acl-14	0.179786	19.6156	2.30382	0.0328499	0.228069	NS
Y71F9AR.2	-0.205969	15.6105	-2.30271	0.0329248	0.228093	NS
cyc-2.1	0.25858	21.7635	2.30257	0.0329342	0.228093	NS
pot-2	-0.208154	18.5958	-2.30062	0.0330656	0.228657	NS
C06G1.1	-0.653237	16.9362	-2.30123	0.0331191	0.228657	NS
kin-4	-0.231811	16.8509	-2.30017	0.033096	0.228657	NS
sgn-1	-0.392472	16.9989	-2.2968	0.033326	0.229485	NS
vgln-1	-0.206438	22.9992	-2.29671	0.0333308	0.229485	NS
cgef-1	-0.208623	15.8568	-2.29653	0.0333431	0.229485	NS
F28D9.4	-0.227063	17.6024	-2.29515	0.0334368	0.229891	NS
wdr-46	-0.216365	16.9985	-2.29262	0.0336099	0.230841	NS
mre-11	0.303182	18.9083	2.29205	0.0336494	0.230873	NS
C32D5.8	0.335878	20.8908	2.29082	0.0337562	0.231366	NS
efr-3	-0.197426	16.9053	-2.28668	0.03402	0.232933	NS
F57G12.1	-0.438561	15.7361	-2.28143	0.0344715	0.235781	NS
nepr-1	0.371582	22.917	2.27932	0.0346154	0.236521	NS
hse-5	-0.263274	17.3366	-2.27708	0.0346921	0.2368	NS
ctns-1	-0.265741	16.9884	-2.27629	0.0347478	0.236936	NS
rhgf-2	-0.299745	16.62	-2.27562	0.0347953	0.237016	NS
mrpl-9	-0.207041	18.8321	-2.27439	0.0348822	0.237129	NS
F21D5.7	-0.156731	20.1862	-2.27388	0.0349189	0.237129	NS
K07A1.15	0.283199	15.7647	2.27387	0.0349193	0.237129	NS
ung-1	0.367075	17.6587	2.27262	0.035018	0.237555	NS
mrrf-1	0.226705	17.9879	2.27102	0.0351228	0.238007	NS
rho-1	0.363478	21.9791	2.27071	0.0352238	0.238007	NS
letm-1	0.271389	17.4263	2.27015	0.0351843	0.238007	NS
C05G5.2	-0.140914	16.4136	-2.26954	0.0352283	0.238007	NS
daf-25	-0.153435	18.7436	-2.26833	0.035315	0.238349	NS
ZK856.7	0.975556	19.5663	2.26787	0.0354458	0.238988	NS
let-721	-0.199152	20.7359	-2.26577	0.0354994	0.239107	NS
Y54F10AL.1	-0.324096	19.4704	-2.2622	0.0357581	0.240398	NS
T06A1.5	-0.287788	15.7642	-2.26212	0.0357637	0.240398	NS
dnc-5	0.325729	17.7102	2.2582	0.0360496	0.241736	NS
smgl-1	-0.146956	18.4509	-2.25812	0.0360553	0.241736	NS
F12F6.1	-0.199161	19.8546	-2.25789	0.0360724	0.241736	NS
rpoa-49	-0.203644	18.0487	-2.2573	0.0361156	0.241781	NS
Y38E10A.24	-0.438409	18.2038	-2.25738	0.0361947	0.242066	NS
Y56A3A.7	-0.555369	18.7093	-2.2562	0.0362948	0.242342	NS
ZK1320.9	0.219123	20.4	2.25466	0.0363098	0.242342	NS
F55F10.1	-0.167138	17.552	-2.25387	0.0363675	0.242342	NS
jmjd-3.1	-0.201331	15.7732	-2.25366	0.036383	0.242342	NS
gln-3	0.507509	20.8506	2.2539	0.0364642	0.242342	NS
unc-82	-0.206553	16.0759	-2.2528	0.0364467	0.242342	NS
cpi-2	0.324907	21.767	2.2525	0.0364922	0.242342	NS
hlh-30	0.691924	16.8519	2.2523	0.0365824	0.242455	NS
chmp-7	0.17002	18.2346	2.25109	0.0365732	0.242455	NS
ampd-1	-0.405741	18.076	-2.25142	0.0366292	0.242502	NS
unc-98	-0.320484	16.1591	-2.24935	0.0367025	0.242502	NS
C47E12.2	0.264377	24.1639	2.2489	0.036736	0.242502	NS
ZC123.1	-0.376381	15.9727	-2.24898	0.0367585	0.242502	NS
C25H3.11	0.184848	17.4339	2.24815	0.036792	0.242502	NS
Y67H2A.2	-0.298069	16.1788	-2.24792	0.0368093	0.242502	NS
sut-2	-0.406595	16.4495	-2.24722	0.0368847	0.242757	NS
Y48G10A.2	0.489344	17.4665	2.24751	0.0369294	0.24281	NS
bec-1	-0.162004	15.9872	-2.24441	0.037072	0.243314	NS
drr-2	-0.228873	19.9237	-2.24431	0.0370796	0.243314	NS
H11E01.3	-0.384387	16.0673	-2.24351	0.0371675	0.243649	NS
gcp-2.1	0.412118	17.992	2.24239	0.0373044	0.243823	NS
T22H9.1	-0.177893	16.0315	-2.24172	0.0372744	0.243823	NS
prx-3	0.281135	17.6955	2.24135	0.0373019	0.243823	NS
krr-1	-0.277615	17.7586	-2.23606	0.0377038	0.24619	NS
ppk-2	0.265824	18.3724	2.23555	0.0377427	0.246201	NS
F15H10.8	-0.582323	16.8517	-2.23537	0.0378564	0.2467	NS
C48B6.2	-0.255919	17.5211	-2.23307	0.0379325	0.246953	NS
F10E7.5	-0.24126	18.0353	-2.2314	0.0380605	0.24723	NS
crld-1	-0.284403	17.8812	-2.23096	0.0380946	0.24723	NS
K08F4.3	0.51466	17.5201	2.23038	0.0382399	0.24723	NS
his-74	0.196404	16.7346	2.22942	0.0382131	0.24723	NS
lsm-6	0.19386	20.7871	2.22936	0.0382181	0.24723	NS
cox-4	0.346048	22.7415	2.22971	0.0382712	0.24723	NS
ZK813.6	-0.201956	15.292	-2.22901	0.0382452	0.24723	NS
Y92H12BL.7	-0.230901	17.4044	-2.22864	0.0382738	0.24723	NS
C43E11.12	0.924978	16.5094	2.22635	0.0385513	0.248538	NS
C55A6.1	-0.346523	16.3038	-2.2251	0.0385481	0.248538	NS
ldp-1	0.182441	20.3967	2.22448	0.0385962	0.248585	NS
mep-1	0.161931	18.606	2.22312	0.0387025	0.249027	NS
cbd-1	0.235604	15.538	2.22225	0.0387706	0.249224	NS
T05A12.4	-0.297412	15.7158	-2.22032	0.0389221	0.249932	NS
algn-14	0.164811	16.6286	2.21988	0.0389563	0.249932	NS
rpl-32	-0.149387	23.7677	-2.21872	0.0390477	0.250276	NS
T23B5.3	0.238838	18.5925	2.21779	0.0391208	0.250502	NS
mrpl-47	-0.179948	17.9039	-2.21505	0.0393373	0.251459	NS
D2005.6	-0.27267	15.605	-2.21494	0.0393462	0.251459	NS
C17C3.1	0.543795	19.6113	2.21354	0.0395591	0.252575	NS
strm-1	-0.238628	16.2535	-2.20943	0.0397861	0.25378	NS
gon-2	0.165541	15.7403	2.20847	0.0398629	0.254025	NS
exc-9	0.271956	17.7892	2.20712	0.0399712	0.254382	NS
Y25C1A.8	0.182835	16.0249	2.20681	0.0399957	0.254382	NS
rpl-38	0.405586	21.2602	2.20652	0.0401118	0.254875	NS
apb-3	-0.196297	15.9998	-2.20322	0.0402859	0.255736	NS
lin-14	-0.507607	16.2256	-2.20275	0.0404269	0.255916	NS
alh-4	0.274446	19.3555	2.20185	0.0403974	0.255916	NS
nud-1	0.265581	21.8766	2.20127	0.0404445	0.255916	NS
col-10	-1.04393	17.8764	-2.20176	0.040507	0.255916	NS
egl-27	-0.176563	18.5196	-2.2005	0.0405075	0.255916	NS
hsp-16.48	1.78956	17.8403	2.20099	0.0405698	0.256065	NS
nars-2	0.204208	17.2154	2.19861	0.0406612	0.25608	NS
col-117	-0.709179	15.8549	-2.1991	0.0407241	0.25608	NS
F41H10.3	0.203854	16.5335	2.1979	0.0407197	0.25608	NS
ing-3	-0.161094	16.9274	-2.19781	0.0407269	0.25608	NS
nmy-2	0.222544	21.7716	2.19696	0.0407965	0.256275	NS
grl-16	-0.91058	17.9258	-2.19543	0.0410248	0.257158	NS
acox-1.1	0.759192	17.6891	2.19508	0.0410537	0.257158	NS
rbm-7	0.197304	16.6763	2.19424	0.04102	0.257158	NS
clp-7	0.238363	17.5133	2.19248	0.0411655	0.257341	NS
acdh-3	0.149006	21.9474	2.19208	0.0411985	0.257341	NS
F29A7.6	-0.190031	16.5628	-2.19207	0.0411994	0.257341	NS
hhat-1	-0.593552	16.7602	-2.18945	0.0415196	0.259096	NS
cdc-42	0.313378	18.1042	2.1871	0.0416118	0.259427	NS
Y17G7B.18	0.241227	19.0465	2.18656	0.0416572	0.259466	NS
unc-94	-0.160191	16.403	-2.1857	0.041729	0.259669	NS
B0361.3	-0.130783	17.9425	-2.18056	0.0421618	0.262075	NS
mdt-4	-0.179783	17.8785	-2.18017	0.0421949	0.262075	NS
josd-1	0.204146	16.9342	2.17945	0.0422557	0.262207	NS
acl-12	0.216193	15.8684	2.17764	0.0424085	0.262909	NS
mdh-1	0.218352	21.9734	2.17534	0.0426045	0.263667	NS
D2045.9	0.288236	18.0694	2.17527	0.0426104	0.263667	NS
T10F2.2	-0.272446	17.6235	-2.17221	0.0428721	0.265038	NS
F56D2.2	-0.19732	16.3183	-2.17037	0.0430303	0.265619	NS
ces-2	0.289319	16.192	2.17019	0.0430462	0.265619	NS
tub-2	-0.260821	15.9715	-2.16852	0.0431905	0.266239	NS
tag-96	-0.302089	18.0962	-2.16791	0.0432432	0.266239	NS
cox-16	-0.266333	17.1545	-2.16763	0.0432674	0.266239	NS
C34C12.2	0.154872	16.7946	2.16684	0.0433351	0.266408	NS
cnep-1	0.262138	16.5718	2.16349	0.0436263	0.267785	NS
lin-10	-0.28776	17.8952	-2.163	0.0436695	0.267785	NS
tars-1	0.189116	22.4706	2.16244	0.0437183	0.267785	NS
hda-6	0.198164	17.9353	2.16241	0.0437208	0.267785	NS
T21B10.3	0.149479	18.3373	2.16133	0.0438148	0.267957	NS
gip-1	0.213761	17.5766	2.16084	0.0438578	0.267957	NS
metr-1	-0.241137	17.4986	-2.1607	0.0438703	0.267957	NS
Y54E10BR.4	-0.220772	21.3983	-2.15944	0.0439809	0.268385	NS
maco-1	-0.147792	15.888	-2.15879	0.0440377	0.268484	NS
F29B9.11	0.409531	20.0774	2.15824	0.0441823	0.268621	NS
fib-1	-0.240804	21.0735	-2.15735	0.044165	0.268621	NS
lmd-3	-0.15359	18.1919	-2.15679	0.0442147	0.268621	NS
nlp-36	-0.18192	15.3928	-2.1567	0.0442224	0.268621	NS
Y11D7A.10	0.539076	16.7016	2.15511	0.0444687	0.269869	NS
bra-1	0.281936	16.1645	2.15123	0.0447072	0.271068	NS
lars-2	0.219326	18.3455	2.15006	0.0448117	0.271453	NS
F29B9.1	0.25259	17.2642	2.14866	0.0449374	0.271966	NS
mvk-1	-0.430477	17.2568	-2.1482	0.0450666	0.272498	NS
F52C12.2	0.521503	17.2529	2.14589	0.0452922	0.273512	NS
apy-1	0.364478	19.6445	2.1451	0.0453438	0.273512	NS
metl-1	-0.256291	18.3662	-2.14398	0.0453582	0.273512	NS
bed-1	0.214831	17.1217	2.14298	0.0454485	0.273808	NS
F09G2.8	0.199078	18.0085	2.14096	0.0456311	0.274552	NS
igcm-3	0.253091	20.7761	2.14039	0.0456832	0.274552	NS
trap-2	-0.277041	21.0577	-2.13969	0.0457468	0.274552	NS
T24H7.2	-0.138332	19.4961	-2.13961	0.045754	0.274552	NS
cey-1	-0.320276	21.656	-2.13918	0.0458255	0.274552	NS
T27F6.6	0.177828	16.9375	2.13903	0.0458072	0.274552	NS
C25H3.7	0.241603	18.6118	2.13827	0.0458767	0.274552	NS
clec-209	0.428585	16.4066	2.13743	0.0460399	0.274552	NS
rpb-10	0.199245	17.6089	2.13676	0.0460142	0.274552	NS
mog-2	-0.168461	21.1055	-2.13634	0.0460525	0.274552	NS
ckb-2	-0.325256	17.2932	-2.136	0.0460842	0.274552	NS
pdi-6	-0.244936	21.2689	-2.13584	0.0460988	0.274552	NS
sel-5	0.147016	17.673	2.1357	0.0461112	0.274552	NS
col-107	-0.878747	16.7771	-2.13581	0.0462085	0.274615	NS
sec-11	0.18845	20.8241	2.13461	0.0462118	0.274615	NS
C06G3.6	-0.175851	17.3128	-2.13423	0.0462462	0.274615	NS
F44E5.1	0.451442	18.7654	2.13411	0.0463643	0.27507	NS
ppk-3	0.22368	17.1711	2.13056	0.0465854	0.276134	NS
mboa-2	0.229447	16.9911	2.12985	0.046651	0.276276	NS
Y111B2A.3	-0.397021	17.8135	-2.12997	0.0467266	0.276476	NS
fzr-1	-0.214199	16.841	-2.12824	0.0468	0.276663	NS
R10E12.2	-0.133123	15.506	-2.12767	0.0468534	0.276732	NS
cox-6A	0.230374	19.3335	2.12662	0.0469505	0.276897	NS
ctl-1	0.539326	21.1818	2.12677	0.0470446	0.276897	NS
pch-2	0.209375	19.4332	2.12571	0.0470361	0.276897	NS
hid-1	-0.176349	18.7523	-2.12557	0.0470486	0.276897	NS
ahsa-1	-0.21247	21.1865	-2.12314	0.0472763	0.277989	NS
cubn-1	-0.170751	15.621	-2.12246	0.0473401	0.278118	NS
T08G11.1	0.176653	20.3315	2.12107	0.0474704	0.278153	NS
M79.2	-0.158031	15.3802	-2.12105	0.0474725	0.278153	NS
upb-1	-0.344186	18.6349	-2.12114	0.0475053	0.278153	NS
tnt-3	-0.404141	18.0639	-2.12071	0.0475957	0.278153	NS
R186.3	0.189279	19.4121	2.11997	0.0475747	0.278153	NS
Y57A10A.8	-0.205553	15.6928	-2.11972	0.0475982	0.278153	NS
F36F12.1	-0.442562	16.1305	-2.11583	0.0480601	0.280605	NS
rad-54.b	0.28048	17.9766	2.11424	0.0481175	0.280693	NS
T09B4.2	0.272659	17.7648	2.11309	0.048227	0.280933	NS
pisy-1	0.306665	16.5391	2.11276	0.0482592	0.280933	NS
F42A6.6	0.206503	16.6861	2.11123	0.0484057	0.280933	NS
F49C12.9	-0.219443	19.6984	-2.11122	0.0484059	0.280933	NS
rsd-3	-0.178891	16.3171	-2.11066	0.0484602	0.280933	NS
lipl-7	0.347771	18.4279	2.11074	0.048493	0.280933	NS
cmd-1	-0.321329	21.5111	-2.11054	0.0485134	0.280933	NS
cdap-2	-0.168403	18.916	-2.11019	0.0485051	0.280933	NS
haf-9	-0.471755	16.772	-2.10965	0.0486511	0.280933	NS
paxt-1	0.154582	17.0316	2.10919	0.0486007	0.280933	NS
odd-2	-0.196843	15.3141	-2.10879	0.0486395	0.280933	NS
chup-1	-0.250487	15.9046	-2.1085	0.0486679	0.280933	NS
nmad-1	-0.317329	16.324	-2.10658	0.0488533	0.281757	NS
nkcc-1	-0.195823	16.2906	-2.10541	0.048966	0.282162	NS
Y69A2AR.16	-0.201991	19.5018	-2.10438	0.049066	0.282263	NS
ceh-44	-0.295279	18.238	-2.10435	0.0490688	0.282263	NS
pes-4	-0.367356	17.7232	-2.10286	0.0492578	0.282859	NS
algn-9	-0.215814	17.7573	-2.10264	0.0492352	0.282859	NS
rab-7	0.161676	20.9112	2.10171	0.0493251	0.283	NS
wrb-1	0.373672	17.1654	2.09798	0.0497159	0.284995	NS
gid-1	0.198555	17.2101	2.09651	0.0498344	0.285427	NS
slt-1	0.428213	16.5407	2.09609	0.049965	0.285637	NS
eif-3.L	-0.126828	20.9803	-2.09487	0.0499966	0.285637	NS
alx-1	0.251717	20.308	2.09483	0.0500005	0.285637	NS
T24B8.4	-0.424145	16.41	-2.09449	0.0501234	0.285827	NS
B0507.1	-0.419213	16.6512	-2.094	0.0501705	0.285827	NS
unc-6	-0.179308	16.1487	-2.09276	0.0502047	0.285827	NS
Y57G11C.33	-0.188946	18.0354	-2.09215	0.0502652	0.285827	NS
mog-5	-0.154335	18.9054	-2.09185	0.0502952	0.285827	NS
F56A8.9	-0.336815	16.8136	-2.0913	0.0503495	0.285827	NS
mrps-12	0.29434	17.1444	2.09048	0.0504316	0.285827	NS
crn-2	0.23585	17.8087	2.0902	0.0504594	0.285827	NS
ech-5	0.210373	19.8116	2.08969	0.0505094	0.285827	NS
pqn-32	-0.800324	18.3436	-2.0901	0.0505789	0.285827	NS
his-1	0.189022	26.9542	2.08948	0.050531	0.285827	NS
tbc-12	-0.250438	15.6916	-2.08942	0.0505367	0.285827	NS
mrpl-14	-0.116209	16.062	-2.08884	0.050595	0.285827	NS
K03B4.1	0.179253	18.2562	2.08803	0.0506755	0.285879	NS
H12D21.10	-0.158644	15.62	-2.08788	0.0506905	0.285879	NS
yif-1	-0.185412	18.2196	-2.08607	0.0508715	0.286655	NS
Y37H9A.3	0.190421	19.7657	2.08418	0.0510612	0.287355	NS
C11H1.7	-0.245834	16.4253	-2.08397	0.0510824	0.287355	NS
unc-95	-0.478403	17.805	-2.08432	0.0511579	0.287398	NS
hpo-27	-0.135411	18.4016	-2.08256	0.051224	0.287398	NS
mrpl-37	-0.173354	19.1584	-2.08227	0.051254	0.287398	NS
acs-20	-0.36402	16.8396	-2.08232	0.0512644	0.287398	NS
cus-2	0.21938	17.4646	2.08154	0.0513271	0.287398	NS
sel-1	-0.129551	19.1556	-2.08131	0.0513506	0.287398	NS
pfd-3	-0.202913	19.4387	-2.07957	0.051527	0.288098	NS
F45E1.2	-0.232519	15.6426	-2.07922	0.0515627	0.288098	NS
T26C11.4	-0.199072	16.4732	-2.07876	0.0516086	0.288112	NS
Y76B12C.6	-0.264997	16.8163	-2.07813	0.0516735	0.288231	NS
mua-3	-0.323993	16.7043	-2.07755	0.0517315	0.288312	NS
C53H9.3	0.245995	18.0076	2.07554	0.0519367	0.289024	NS
Y71H2AM.2	0.252698	18.9369	2.07544	0.0519467	0.289024	NS
nstp-5	0.26194	17.392	2.07398	0.0520969	0.28945	NS
arp-11	0.317729	17.5343	2.07384	0.0521106	0.28945	NS
ekl-6	-0.136637	19.0163	-2.07273	0.0522242	0.289488	NS
tasp-1	0.23156	17.9121	2.0727	0.0522274	0.289488	NS
R08E3.3	-0.215561	16.7958	-2.0725	0.0522486	0.289488	NS
F21G4.1	0.544725	16.2809	2.07258	0.0523513	0.289814	NS
R05G9.3	0.239918	18.0025	2.06884	0.0526254	0.290959	NS
ddl-3	0.191156	19.6183	2.06864	0.052646	0.290959	NS
2024-05-01	-0.217701	17.0668	-2.06782	0.052731	0.291186	NS
T20G5.9	0.202568	19.7352	2.06688	0.0528283	0.29148	NS
arx-4	-0.133508	20.3489	-2.06618	0.0529004	0.291615	NS
unc-32.1	-0.134976	18.8639	-2.0658	0.0529409	0.291615	NS
sec-6	-0.125868	18.0568	-2.065	0.0530235	0.291827	NS
myrf-2	0.315878	18.9456	2.06384	0.0531712	0.292398	NS
Y56A3A.31	-0.282665	16.7621	-2.0625	0.0532842	0.292573	NS
sod-3	0.575148	17.4663	2.06256	0.05339	0.292573	NS
afd-1	0.187709	18.4812	2.06197	0.0533396	0.292573	NS
T23F2.13	-0.684975	17.2013	-2.06205	0.0534432	0.292573	NS
rpl-9	-0.149645	24.1201	-2.06094	0.0534474	0.292573	NS
blos-1	0.205483	17.8482	2.06073	0.0534696	0.292573	NS
ufd-2	-0.144782	19.8265	-2.06032	0.0535124	0.292573	NS
F37A4.2	-0.185398	16.8275	-2.05937	0.0536124	0.292878	NS
tth-1	0.336819	20.533	2.05794	0.0538486	0.293442	NS
cnk-1	-0.156336	16.8739	-2.05761	0.0537981	0.293442	NS
F20C5.6	-0.220985	16.9869	-2.05752	0.0538072	0.293442	NS
inx-9	0.431058	15.8961	2.05747	0.0539244	0.293613	NS
ubc-25	-0.219151	17.2832	-2.05519	0.0540537	0.294075	NS
T13F2.2	0.183995	19.3069	2.05272	0.0543156	0.295257	NS
msh-6	0.367728	18.8876	2.05171	0.0545171	0.29611	NS
teg-4	0.0987106	20.686	2.04949	0.0546601	0.296643	NS
D1069.3	-0.154827	17.6769	-2.04871	0.0547434	0.296852	NS
madf-3	0.221207	17.5545	2.04664	0.0549654	0.297812	NS
F25H8.2	-0.263735	17.0537	-2.04606	0.0550278	0.297906	NS
ppw-2	0.325732	18.1896	2.04469	0.0552026	0.298135	NS
mppa-1	-0.203924	19.8196	-2.04436	0.0552111	0.298135	NS
R166.3	-0.339055	16.3701	-2.04369	0.0552832	0.298135	NS
ark-1	-0.197245	17.9006	-2.04363	0.0552897	0.298135	NS
F39B2.3	-0.173294	17.2027	-2.04358	0.0552952	0.298135	NS
B0238.11	-0.205446	19.2465	-2.04285	0.0553746	0.298155	NS
homt-1	0.325585	16.9402	2.04271	0.0553891	0.298155	NS
mtrr-1	0.171523	19.8428	2.04176	0.0554926	0.29847	NS
nhx-5	0.307547	17.0267	2.04031	0.0556504	0.299076	NS
T16G12.4	0.569059	17.7879	2.03979	0.0558201	0.299259	NS
srpa-68	-0.152603	19.8139	-2.03909	0.0557823	0.299259	NS
dlat-1	-0.137824	22.1328	-2.03878	0.0558167	0.299259	NS
Y69A2AR.28	0.462209	18.4511	2.03855	0.0559545	0.299737	NS
nfi-1	-0.142224	16.1433	-2.03688	0.0560239	0.299866	NS
Y61A9LA.1	1.17676	16.1487	2.03498	0.0563454	0.301343	NS
sec-5	-0.132888	17.8393	-2.03096	0.0566745	0.302859	NS
eif-3.D	-0.119139	20.6267	-2.02969	0.0568155	0.302918	NS
mans-4	-0.215851	16.8987	-2.02895	0.0568976	0.302918	NS
Y111B2A.12	-0.245892	17.2306	-2.02889	0.0569033	0.302918	NS
sdha-1	0.25049	21.5731	2.02877	0.0569176	0.302918	NS
syx-5	-0.133017	17.8621	-2.02838	0.0569602	0.302918	NS
nyn-2	-0.348297	16.3482	-2.0284	0.0569744	0.302918	NS
exo-3	0.24941	19.544	2.02797	0.0570058	0.302918	NS
F10D7.3	-0.199816	15.6399	-2.02503	0.0573334	0.304414	NS
F14H3.6	0.451234	19.4914	2.02509	0.0574409	0.304497	NS
lad-2	-0.164727	15.698	-2.02436	0.0574087	0.304497	NS
F59A2.5	0.58715	17.9319	2.0228	0.0576974	0.305611	NS
rsp-1	-0.253747	21.8072	-2.02023	0.0578717	0.30629	NS
ceh-27	0.188508	16.1642	2.01887	0.058025	0.306856	NS
W09H1.5	0.185887	20.5118	2.01779	0.0581474	0.307258	NS
cku-80	0.14755	19.3153	2.01735	0.0581965	0.307272	NS
pdk-1.1	0.195293	17.7987	2.0144	0.0585315	0.308633	NS
dars-1	0.15076	22.5532	2.01426	0.0585474	0.308633	NS
C29E4.15	-0.258493	17.0709	-2.01262	0.0587337	0.309368	NS
C06A5.3	0.149365	18.2987	2.01157	0.0588545	0.309713	NS
rme-8	0.145494	19.1169	2.01123	0.0588928	0.309713	NS
dhrs-4	0.813413	17.6731	2.01003	0.0591458	0.310264	NS
mrps-18a	-0.179133	17.6843	-2.00961	0.0590781	0.310264	NS
gei-15	-0.48794	17.3396	-2.00976	0.0591763	0.310264	NS
npp-21	1.30774	16.2816	2.00875	0.0592924	0.310264	NS
ekl-1	0.203207	18.7508	2.0074	0.0593325	0.310264	NS
samt-1	-0.454564	16.3069	-2.00738	0.0594497	0.310264	NS
ZK899.2	0.309924	18.1859	2.00669	0.0594241	0.310264	NS
pdi-2	-0.313534	23.1348	-2.0066	0.0595182	0.310264	NS
wago-4	-0.200319	19.2306	-2.00626	0.0594641	0.310264	NS
ZK637.14	-0.137808	15.7893	-2.00604	0.0594894	0.310264	NS
ZC155.4	0.459282	16.1875	2.00606	0.0596017	0.310264	NS
rnp-7	-0.158599	19.7669	-2.00562	0.0595373	0.310264	NS
spdl-1	0.365864	18.6861	2.00546	0.0596535	0.310264	NS
ZK688.5	0.187571	18.8499	2.00473	0.0596402	0.310264	NS
H05C05.1	0.140246	18.7222	2.00165	0.0599976	0.311809	NS
pek-1	0.195134	21.1092	2.0005	0.0601315	0.312029	NS
rrf-3	0.195168	16.7825	2.00025	0.0601611	0.312029	NS
sgk-1	-0.27191	16.199	-2.00007	0.0601814	0.312029	NS
ncl-1	-0.159413	18.3196	-1.99929	0.0602723	0.312256	NS
F37B12.3	0.364094	16.9876	1.99888	0.0603484	0.312405	NS
ugt-20	0.290128	15.9943	1.99691	0.060551	0.31321	NS
mes-6	0.172622	17.177	1.99556	0.0607105	0.313486	NS
hpl-1	0.286426	16.7732	1.99543	0.0607248	0.313486	NS
hrpa-2	0.327544	17.042	1.99525	0.0607465	0.313486	NS
rpl-24.1	-0.144815	23.822	-1.99204	0.0611246	0.315192	NS
ZC84.1	-0.231241	15.5987	-1.99012	0.0613522	0.316119	NS
acaa-2	0.208807	22.9116	1.98914	0.0614686	0.316473	NS
rei-2	-0.208175	15.8489	-1.98676	0.0617525	0.317687	NS
F54D8.6	-0.176718	18.1521	-1.98589	0.061856	0.317972	NS
vha-16	-0.229259	19.979	-1.98428	0.0620482	0.318713	NS
F07A11.5	-0.237013	16.4983	-1.98257	0.0622544	0.319524	NS
acds-10	0.570112	18.142	1.98259	0.0623678	0.319665	NS
cyy-1	-0.169238	16.8723	-1.98151	0.0623814	0.319665	NS
unc-5	-0.198696	16.4889	-1.98114	0.0624266	0.319665	NS
gpb-1	-0.26603	21.1442	-1.97988	0.062578	0.320049	NS
Y62E10A.6	-0.270542	18.043	-1.97953	0.0626205	0.320049	NS
K07A12.1	0.187521	18.7139	1.97931	0.0626467	0.320049	NS
dph-6	0.220719	16.5833	1.97778	0.0628317	0.320747	NS
mrps-17	-0.159722	20.4303	-1.97346	0.0633578	0.323183	NS
M03C11.8	0.146349	20.4759	1.97167	0.0635764	0.324049	NS
pyk-2	0.462142	17.1388	1.97171	0.0636886	0.324371	NS
K10C3.4	0.304471	18.0968	1.96941	0.0638552	0.324969	NS
C50B8.6	-0.22161	15.7193	-1.96843	0.0639751	0.325296	NS
cdc-48.3	0.174179	20.766	1.96808	0.0640176	0.325296	NS
fcd-2	0.244773	18.4746	1.96727	0.0641176	0.325554	NS
T20D3.6	-0.237611	19.0602	-1.9664	0.0642252	0.325656	NS
lsd-1	-0.200067	17.1924	-1.96631	0.0642359	0.325656	NS
ran-2.1	-0.152698	20.0879	-1.96285	0.0646648	0.327386	NS
tut-1	-0.175037	17.9789	-1.96251	0.0647073	0.327386	NS
lin-25	-0.16683	16.7938	-1.96173	0.0648052	0.327386	NS
F43B10.1	-0.286785	16.6052	-1.96166	0.0648129	0.327386	NS
F25H9.6	0.202592	17.564	1.96123	0.0648671	0.327386	NS
C56E10.3	-0.238105	18.1596	-1.96067	0.0649368	0.327386	NS
ttx-7.1	0.207691	21.0006	1.96065	0.0649399	0.327386	NS
rig-4	0.109679	17.9404	1.96038	0.0649728	0.327386	NS
C53D5.1	-0.177032	15.6832	-1.95991	0.0650322	0.327436	NS
npl-4.2	0.249132	19.1693	1.95934	0.0651031	0.327544	NS
Y108G3AL.2	0.217782	16.8214	1.95853	0.0652042	0.327803	NS
fbxb-95	0.632763	16.7777	1.95794	0.0653962	0.32827	NS
rpac-19	-0.267293	18.0456	-1.95733	0.0653556	0.32827	NS
let-767	0.207167	19.9132	1.9545	0.0657112	0.329601	NS
sup-37	-0.243618	17.5879	-1.95301	0.0658994	0.330295	NS
algn-11	0.222886	18.4937	1.95236	0.0659816	0.330457	NS
mif-1	0.475257	17.4768	1.95196	0.0661505	0.330803	NS
ife-1	0.278125	18.3052	1.95152	0.0660879	0.330739	NS
unc-68	-0.21734	16.2843	-1.95007	0.0662716	0.331158	NS
sac-2	-0.133008	16.6934	-1.94967	0.0663232	0.331166	NS
eea-1	-0.125122	18.2751	-1.94873	0.0664428	0.331513	NS
vps-24	0.429717	17.8435	1.94884	0.0665468	0.331555	NS
F54A3.5	-0.199144	18.8688	-1.94788	0.0665514	0.331555	NS
T22F7.3	-0.162967	15.885	-1.94701	0.0666619	0.331856	NS
serp-1.1	-0.294298	17.0648	-1.94597	0.0667955	0.332271	NS
ate-1	0.123492	18.3483	1.9453	0.0668805	0.332444	NS
lrch-1	0.446386	19.3419	1.94235	0.0673789	0.33442	NS
rpl-36	-0.181764	24.3079	-1.94201	0.0673032	0.334294	NS
frh-1	0.236792	17.2316	1.94014	0.0675451	0.334793	NS
K12H4.3	-0.21133	17.6113	-1.93962	0.0676125	0.334793	NS
asp-4	0.272042	20.0885	1.93938	0.0676429	0.334793	NS
gale-1	-0.2772	19.1954	-1.93928	0.0676564	0.334793	NS
ran-1	0.274873	23.7897	1.93844	0.0677985	0.335246	NS
urm-1	-0.297426	19.3146	-1.93752	0.0679126	0.335559	NS
F36D4.5	-0.158534	17.5233	-1.9367	0.0679917	0.3357	NS
pdp-1	-0.143078	15.9475	-1.93628	0.0680461	0.335718	NS
pign-1	-0.131553	17.0772	-1.93507	0.068203	0.335966	NS
pyk-1	-0.198275	22.4624	-1.93484	0.0682334	0.335966	NS
riok-3	0.185947	17.1982	1.93434	0.0682987	0.335966	NS
Y75B8A.19	0.250396	17.0427	1.934	0.0683427	0.335966	NS
mlk-1	-0.123036	15.5094	-1.93395	0.06835	0.335966	NS
F32D8.12	0.698713	16.6325	1.93357	0.0685176	0.336071	NS
F37C12.3	0.363855	19.427	1.9325	0.0686448	0.336071	NS
C16C10.2	-0.163791	16.2725	-1.93217	0.068582	0.336071	NS
unc-115	-0.435409	17.9137	-1.9324	0.0686713	0.336071	NS
ztf-29	0.447487	17.0285	1.93194	0.0687324	0.336071	NS
Y71F9AR.4	0.154132	16.7502	1.93148	0.0686735	0.336071	NS
F08G12.1	-0.218839	18.4987	-1.93083	0.0687584	0.336071	NS
sax-7	-0.224451	20.2724	-1.93068	0.0687775	0.336071	NS
vms-1	0.145649	18.0417	1.93015	0.0688471	0.336163	NS
F54F7.2	0.402855	15.9788	1.92907	0.0691024	0.336912	NS
ceh-20	-0.211654	17.2944	-1.92861	0.0690498	0.336904	NS
#NAME?	-0.366494	17.811	-1.92832	0.0691883	0.337083	NS
cox-6b	0.5601	21.237	1.92637	0.0694662	0.337921	NS
dylt-1	0.166333	18.6396	1.92564	0.0694435	0.337921	NS
mrps-15	-0.157089	18.1906	-1.92511	0.0695135	0.337921	NS
T28B8.1	0.434794	16.5889	1.92413	0.0697503	0.338575	NS
coa-5	0.214214	17.7083	1.92369	0.0697022	0.338575	NS
din-1	0.147019	17.2127	1.92246	0.0698651	0.338884	NS
ZK287.1	-0.325954	16.3669	-1.92207	0.0699193	0.338899	NS
aakg-1	0.182428	16.8924	1.92058	0.0701162	0.339605	NS
T22D1.3	0.390037	16.9773	1.9202	0.0702651	0.340077	NS
lsm-3	0.960865	18.5048	1.91903	0.0704432	0.34069	NS
sek-3	0.197742	16.202	1.91678	0.0706261	0.341186	NS
C45B2.6	0.171961	16.3431	1.91628	0.0706931	0.341186	NS
R11D1.10	0.137372	16.7564	1.91608	0.0707198	0.341186	NS
nemp-1	0.157996	19.1127	1.91568	0.0707737	0.341186	NS
B0286.1	-0.127555	15.2274	-1.91546	0.0708034	0.341186	NS
Y32H12A.8	-0.15362	17.4549	-1.91451	0.0709314	0.341523	NS
R12E2.13	0.188803	18.5656	1.91415	0.0709799	0.341523	NS
Y56A3A.6	-0.153028	15.5924	-1.9138	0.071028	0.341523	NS
rfc-3	0.250254	20.1406	1.91319	0.0711105	0.341671	NS
atg-5	0.196773	17.9167	1.91146	0.0713448	0.342451	NS
acsd-1	0.38137	17.316	1.91138	0.0714552	0.342451	NS
tbh-1	0.417565	21.4814	1.9109	0.0715407	0.342451	NS
C10F3.7	-0.732309	17.4084	-1.91059	0.0715832	0.342451	NS
bath-40	-0.278129	17.0855	-1.91023	0.071512	0.342451	NS
aldo-2	0.143297	24.0199	1.91013	0.0715247	0.342451	NS
T05H10.4	0.472948	19.4362	1.90875	0.0718331	0.343371	NS
tps-2	-0.274829	16.4775	-1.90753	0.0718793	0.343371	NS
dnj-7	-0.254225	19.6602	-1.90654	0.0720151	0.343772	NS
mlt-10	-0.508879	16.5643	-1.90644	0.0721492	0.343916	NS
T05E7.3	-0.166627	16.2438	-1.90578	0.0721195	0.343916	NS
trpp-10	-0.15139	15.9177	-1.90506	0.0722178	0.343996	NS
C55B6.1	0.204508	16.5653	1.90418	0.0723379	0.34432	NS
Y65B4A.2	-0.275933	15.7396	-1.90332	0.072457	0.344439	NS
ced-1.1	0.139067	17.2952	1.90325	0.0724669	0.344439	NS
dus-2	-0.347969	16.5533	-1.90228	0.0726282	0.344958	NS
vha-6	-0.593204	16.395	-1.90131	0.0728539	0.345088	NS
clc-6	-0.247297	15.3735	-1.90089	0.0727917	0.345088	NS
T04C9.1	-0.125309	17.8637	-1.90078	0.0728066	0.345088	NS
F26H9.5	-0.221994	20.0956	-1.90037	0.072864	0.345088	NS
ubc-6	-0.229634	18.5455	-1.89982	0.0729394	0.345198	NS
C34E10.12	0.45603	16.6046	1.89907	0.0731647	0.345876	NS
C29F5.1	-0.606768	19.4365	-1.89853	0.0732394	0.345876	NS
ran-4	0.216683	21.1041	1.89793	0.0732023	0.345876	NS
pod-2	-0.306851	18.2583	-1.89725	0.0733253	0.346035	NS
B0564.2	0.223914	17.8845	1.89626	0.0734339	0.346301	NS
rga-4	0.309909	18.6901	1.89558	0.0735783	0.34656	NS
rpac-40	-0.162685	19.6395	-1.89478	0.0736399	0.34656	NS
mrps-7	0.230027	16.5463	1.89474	0.0736461	0.34656	NS
ppw-1	0.240524	20.2893	1.89409	0.0737369	0.346686	NS
cgp-1	-0.176904	19.1833	-1.8938	0.0737775	0.346686	NS
lin-13	0.191342	18.6459	1.89289	0.0739045	0.347036	NS
Y71F9B.9	-0.490146	16.7097	-1.89253	0.0740757	0.347594	NS
C36B1.11	-0.184807	16.9085	-1.89089	0.0741851	0.347861	NS
unc-119	-0.134455	17.6605	-1.88919	0.0744244	0.348706	NS
plx-1	-0.158289	16.9748	-1.88886	0.0744707	0.348706	NS
psf-1	-0.128702	18.046	-1.8872	0.0747049	0.349556	NS
F40G9.17	0.164464	18.3987	1.88607	0.0748644	0.350054	NS
pqn-80	0.170881	19.6833	1.88506	0.0750077	0.350477	NS
cpna-1	-0.562519	16.6004	-1.88324	0.0753882	0.352007	NS
F12F6.7	0.288024	19.7594	1.88198	0.0754749	0.352163	NS
C05C8.7	-0.373897	17.6063	-1.88101	0.0756867	0.352522	NS
C50F4.16	0.203	17.9584	1.88016	0.0757061	0.352522	NS
hira-1	0.199202	18.4976	1.88012	0.0757115	0.352522	NS
F53E10.1	0.243136	17.624	1.87904	0.0758664	0.352995	NS
ZK228.3	0.282222	15.7233	1.87856	0.0759549	0.353158	NS
F08F8.7	0.437914	18.5373	1.87742	0.0762206	0.353897	NS
nhr-100	-0.139579	15.6887	-1.87691	0.0761718	0.353897	NS
dct-18	-0.491766	17.1464	-1.87687	0.0762989	0.354012	NS
cpd-1	-0.365759	20.947	-1.87618	0.0763986	0.35406	NS
mgrn-1	-0.137092	15.4459	-1.87464	0.0764989	0.35406	NS
flu-2	-0.175439	17.5674	-1.87425	0.0765551	0.35406	NS
atp-1.1	-0.241522	15.4976	-1.87412	0.0765747	0.35406	NS
rrf-1	0.154175	17.8724	1.87401	0.0765894	0.35406	NS
acdh-13	-0.166034	18.8803	-1.87351	0.0766621	0.35406	NS
moag-4	0.220899	18.4396	1.87336	0.0766835	0.35406	NS
nrde-3	-0.216278	19.4701	-1.87222	0.0768494	0.354578	NS
cpi-1	0.938933	16.3414	1.87227	0.0769639	0.354859	NS
rga-2	-0.203696	15.8406	-1.87045	0.077106	0.355267	NS
smu-2	-0.106528	17.9913	-1.86936	0.0772641	0.355748	NS
zyg-12.1	0.146396	17.7569	1.86895	0.0773236	0.355775	NS
dpff-1	0.421432	15.7838	1.86911	0.0774237	0.355988	NS
ctf-8	0.597495	16.7255	1.8686	0.0774975	0.35608	NS
mpz-1	-0.246463	15.8893	-1.86686	0.0776295	0.356439	NS
C18B2.5	-0.688719	17.345	-1.86637	0.0778231	0.357046	NS
nhr-48	0.205601	15.8366	1.86522	0.0778696	0.357046	NS
C40A11.2	0.63288	18.9043	1.86414	0.0781506	0.357839	NS
hsr-9	-0.133766	20.2452	-1.86365	0.0781006	0.357839	NS
rpb-6	-0.446958	16.6598	-1.86327	0.0782788	0.357931	NS
W02G9.3	0.186311	18.1607	1.86265	0.0782473	0.357931	NS
map-2	0.218981	20.4589	1.86199	0.0783438	0.357981	NS
swsn-2.2	0.143385	20.0914	1.86086	0.0785113	0.358286	NS
set-2	-0.164278	16.8538	-1.86081	0.0785189	0.358286	NS
blos-2	0.360127	16.6955	1.85939	0.0787912	0.359282	NS
sel-10	-0.165024	15.6263	-1.85843	0.0788701	0.359394	NS
nfyb-1	-0.254339	18.0102	-1.85711	0.0790663	0.359721	NS
ZC373.2	0.64354	16.5336	1.85731	0.0791592	0.359721	NS
F42F12.3	0.273788	16.5608	1.85673	0.0791224	0.359721	NS
ced-12	-0.205481	16.7261	-1.85663	0.0791372	0.359721	NS
F08F3.6	0.543075	16.2628	1.8568	0.0792345	0.359816	NS
smg-1	0.197249	17.386	1.85329	0.079636	0.361089	NS
egl-18	-0.22733	17.7147	-1.85301	0.0796771	0.361089	NS
ZK177.8	-0.151269	15.7337	-1.85301	0.0796785	0.361089	NS
set-32	0.54526	16.1971	1.85302	0.0797997	0.361391	NS
ifb-1	-0.463336	18.9962	-1.8513	0.0800567	0.36206	NS
ivns-1	-0.188358	19.0353	-1.85103	0.0799752	0.361939	NS
ymel-1	0.146389	19.518	1.84937	0.0802247	0.362572	NS
R06C1.4	0.648029	18.2551	1.84927	0.0803623	0.362778	NS
agl-1	-0.140274	19.7325	-1.84804	0.0804242	0.362778	NS
mbd-2	0.196727	16.6059	1.84797	0.0804346	0.362778	NS
gly-5.1	-0.841399	16.3496	-1.84819	0.0805243	0.362935	NS
atf-7.1	0.346919	16.657	1.84655	0.0806926	0.363446	NS
vdac-1	0.1421	25.3125	1.84586	0.0807532	0.363472	NS
H42K12.3	-0.545257	19.3245	-1.84604	0.0808493	0.363622	NS
B0361.6	-0.132551	17.1496	-1.84492	0.0808963	0.363622	NS
gcst-1	0.205723	19.9221	1.84337	0.0811311	0.364189	NS
tir-1	-0.159247	16.349	-1.84336	0.0811326	0.364189	NS
R107.2	0.353265	17.5413	1.84255	0.0813563	0.364921	NS
vit-4	-0.612245	26.6686	-1.84234	0.0814117	0.364921	NS
rab-14	0.177339	18.8795	1.84102	0.0814891	0.364921	NS
F56A11.5	0.308433	18.9396	1.84102	0.0815713	0.364921	NS
mel-11	-0.155357	18.6634	-1.84052	0.0815664	0.364921	NS
ubr-1	-0.155234	18.3445	-1.8388	0.0818283	0.365824	NS
C35B1.5	0.617878	19.7595	1.83792	0.0820877	0.366488	NS
K02F3.12	-0.165703	16.1505	-1.83748	0.0820318	0.366486	NS
H20J04.9	0.179652	17.5708	1.83528	0.0823699	0.367283	NS
adbp-1	-0.194278	17.8807	-1.83507	0.0824025	0.367283	NS
acl-2	0.179093	17.2424	1.83482	0.0824409	0.367283	NS
gcs-1	0.155912	19.3028	1.83451	0.0824875	0.367283	NS
sad-1	-0.14058	15.353	-1.83358	0.0826312	0.367676	NS
mig-14	-0.316199	19.1688	-1.83347	0.0827494	0.367707	NS
C11H1.9	-0.321471	16.6345	-1.83322	0.0827047	0.367707	NS
egl-43	-0.157061	15.3005	-1.83214	0.082855	0.36793	NS
ttr-15	0.814146	16.8336	1.83228	0.0829557	0.368039	NS
dhs-28	0.552567	20.7898	1.83199	0.0830009	0.368039	NS
mab-20	0.205381	19.8065	1.8309	0.0830465	0.368039	NS
ZC84.6	-0.153929	15.5376	-1.83044	0.0831176	0.368108	NS
Y67D8A.2	0.129513	16.5625	1.82952	0.0832611	0.368497	NS
lido-13	-0.157296	16.483	-1.82867	0.0833933	0.368836	NS
alh-6	0.264181	20.4124	1.82684	0.083696	0.369608	NS
iff-2	-0.440624	19.6484	-1.82691	0.0837913	0.369608	NS
isp-1	0.136414	22.8362	1.82657	0.0837204	0.369608	NS
hrpr-1	-0.13906	23.1899	-1.82621	0.0837769	0.369608	NS
T28C6.7	-0.167186	19.1887	-1.82548	0.0838909	0.369801	NS
pros-1	-0.157026	16.1902	-1.82502	0.0839631	0.369853	NS
eft-3	0.156472	27.4566	1.82467	0.0840173	0.369853	NS
phf-10	0.181976	19.3886	1.82408	0.08411	0.369853	NS
snx-3	-0.123562	19.973	-1.82364	0.0841794	0.369853	NS
F21D5.5	0.221091	18.7602	1.82363	0.0841818	0.369853	NS
F52D2.7	-0.194426	17.1399	-1.82325	0.084241	0.369867	NS
ncx-2.	-0.509717	17.8211	-1.82303	0.0843998	0.370319	NS
phg-1	-0.438691	16.5965	-1.82227	0.0845183	0.370593	NS
tbp-1	-0.286079	16.9776	-1.82108	0.0845828	0.370631	NS
smg-4	0.172932	16.7793	1.8194	0.0848476	0.371525	NS
wars-1	0.19012	20.8476	1.81907	0.0848992	0.371525	NS
K07F5.15	0.423627	16.5799	1.8189	0.0850508	0.371636	NS
ddl-1	-0.155596	17.1607	-1.8186	0.0849742	0.371608	NS
Y57A10A.13	0.179802	18.3239	1.81785	0.0850929	0.371636	NS
polh-1	0.274054	15.7513	1.81756	0.0851568	0.37167	NS
lgg-3	0.241691	17.9498	1.81538	0.0854847	0.372855	NS
tftc-3	-0.135408	17.4123	-1.81473	0.0855892	0.372999	NS
syd-9	-0.346092	17.7603	-1.81433	0.0857553	0.372999	NS
lin-54	-0.148435	18.1423	-1.81404	0.0856986	0.372999	NS
C49C3.6	0.235491	16.2659	1.81402	0.0857022	0.372999	NS
Y39B6A.10	0.23323	19.3312	1.81341	0.0857995	0.372999	NS
msd-2	0.449789	17.4483	1.81145	0.0862372	0.374215	NS
unc-60	0.860343	16.2627	1.81138	0.0862485	0.374215	NS
sup-12	-0.278159	17.0674	-1.81091	0.0861983	0.374215	NS
hsp-110	0.230019	22.4514	1.80882	0.0865346	0.374909	NS
C06A6.2	0.130736	17.695	1.80838	0.0866047	0.374909	NS
pkc-1	-0.297066	16.344	-1.80829	0.0866202	0.374909	NS
Y76A2B.5	0.189184	16.1658	1.80787	0.086687	0.374909	NS
nlp-77	0.254266	20.0236	1.80784	0.0866916	0.374909	NS
gly-3	-0.139604	19.2	-1.80651	0.0869076	0.375453	NS
ddx-35	0.167685	17.6788	1.80636	0.0869308	0.375453	NS
emb-9	-0.495583	18.7169	-1.80402	0.0874346	0.377072	NS
cdc-48.1	0.191423	23.0086	1.80372	0.0873576	0.37705	NS
rbr-2	-0.12563	17.3743	-1.80299	0.0874767	0.377072	NS
szy-5	0.721095	16.5324	1.80153	0.0878389	0.378142	NS
cox-14	-0.19564	17.839	-1.80121	0.0877661	0.378074	NS
nth-1	0.158544	15.7187	1.79997	0.0879687	0.378454	NS
rab-39	0.175205	17.4657	1.79946	0.0880508	0.378561	NS
W02B12.11	-0.18122	17.409	-1.799	0.0881273	0.378644	NS
erfa-1	0.12242	21.7839	1.79862	0.0881884	0.378661	NS
snr-2	-0.118607	22.6681	-1.79761	0.0883542	0.379017	NS
nrd-1	-0.154915	18.4248	-1.79742	0.0883858	0.379017	NS
mam-1	-0.336486	16.4091	-1.79632	0.0886171	0.379713	NS
acl-5	0.176615	17.5577	1.79573	0.0886627	0.379713	NS
gcsh-1	-0.234031	17.0256	-1.79511	0.0887636	0.379899	NS
cpt-2	0.221734	20.5573	1.79465	0.0888401	0.379981	NS
spl-3	0.238214	17.504	1.79246	0.0892008	0.381277	NS
R02D5.8	0.16404	16.3708	1.79147	0.0893637	0.381679	NS
5N226	-0.157515	17.7027	-1.79119	0.0894101	0.381679	NS
T16G1.9	-0.110269	18.7304	-1.79043	0.0895368	0.381859	NS
tag-250	-0.251485	16.8383	-1.78977	0.0896465	0.381859	NS
C26B9.3	-0.538733	18.9253	-1.78995	0.0897407	0.381859	NS
unc-40	0.190627	17.8221	1.78967	0.0896634	0.381859	NS
cogc-6	-0.161254	18.1041	-1.78937	0.089713	0.381859	NS
serp-1.2	0.310018	20.1686	1.78946	0.0898009	0.38187	NS
C33F10.14	0.159203	19.8012	1.78799	0.0899421	0.382018	NS
C18B12.4	0.143885	17.0378	1.78793	0.0899511	0.382018	NS
mrpl-24	-0.144529	18.5517	-1.78697	0.0901113	0.382264	NS
bre-1	-0.341103	18.225	-1.78708	0.0901985	0.382264	NS
K11H3.3	0.176326	19.6893	1.78593	0.0902843	0.382264	NS
Y105C5A.1	0.256183	16.0921	1.78592	0.0902862	0.382264	NS
C25A1.1	0.147194	17.3949	1.78562	0.0903361	0.382264	NS
ZC328.3	-0.15615	15.6498	-1.78551	0.0903555	0.382264	NS
unc-1	-0.554779	16.6286	-1.78552	0.0904786	0.382522	NS
prx-19	0.321701	17.469	1.78407	0.0906475	0.382522	NS
hosl-1	-0.125021	15.7261	-1.78383	0.0906357	0.382522	NS
ints-7	-0.12286	18.4288	-1.7838	0.0906416	0.382522	NS
spd-5	0.351867	20.3809	1.78324	0.0908599	0.383023	NS
ctg-1	-0.311686	17.8885	-1.78273	0.0908819	0.383023	NS
Y56A3A.22	0.456851	16.9191	1.77824	0.0917007	0.386121	NS
C03A3.2	-0.243261	16.6143	-1.77731	0.0917335	0.386121	NS
Y42H9AR.1	0.167531	20.9313	1.77491	0.0921401	0.387586	NS
mtm-6	0.184959	17.1285	1.77354	0.0923729	0.388318	NS
mce-1	0.359493	18.6689	1.7729	0.0926078	0.389059	NS
B0272.4	0.703447	17.3817	1.77203	0.0927566	0.389368	NS
brd-1	0.248883	17.4397	1.77104	0.0927991	0.389368	NS
arf-3	-0.205783	22.0276	-1.77007	0.0929652	0.389818	NS
F44E5.4	0.747456	16.2366	1.76994	0.0931135	0.389878	NS
lips-3	-0.365843	16.2118	-1.76992	0.0931012	0.389878	NS
F58H1.3	-0.179081	15.8118	-1.76896	0.0931562	0.389878	NS
pdpr-1	-0.135591	17.4836	-1.76806	0.0933108	0.390138	NS
gpd-1	0.159167	23.4419	1.76791	0.0933361	0.390138	NS
mdt-21	0.228945	17.3345	1.76708	0.0934781	0.39039	NS
K03H1.13	0.339202	16.021	1.76714	0.0935732	0.39039	NS
glrx-3	0.170053	20.084	1.76685	0.0935182	0.39039	NS
dnj-8	-0.222929	18.4639	-1.76614	0.0936397	0.390415	NS
F14E5.2	-0.279031	19.7999	-1.7659	0.093734	0.390415	NS
Y48C3A.12	-0.204247	17.8376	-1.76547	0.0937562	0.390415	NS
wnk-1	-0.122365	17.4619	-1.76202	0.0943531	0.392654	NS
EGAP2.1	-0.275534	15.7758	-1.76034	0.0946743	0.393743	NS
pnp-1	0.302317	19.492	1.75995	0.0948138	0.394022	NS
rnf-5	-0.155178	16.6332	-1.7591	0.0948606	0.394022	NS
atx-2.1	-0.136828	19.869	-1.75766	0.0951108	0.394793	NS
mrs-2	0.176903	17.3241	1.75735	0.0951653	0.394793	NS
gtf-2f2	0.281878	18.0514	1.75613	0.095408	0.395372	NS
F53H8.3	-0.27838	15.6176	-1.75582	0.095484	0.395372	NS
C07D8.6	0.230986	23.4293	1.75568	0.0954577	0.395372	NS
pqn-83	0.213852	17.58	1.75444	0.0956748	0.395914	NS
F21C10.7	-0.293934	16.7635	-1.75371	0.0958023	0.396194	NS
lbp-9	0.291815	22.5092	1.75378	0.0958962	0.396335	NS
R74.2	-0.511447	16.2665	-1.75293	0.0960653	0.396539	NS
R05F9.9	0.128084	17.7155	1.75273	0.0959754	0.396415	NS
Y75B8A.24	-0.1475	17.991	-1.75098	0.0962837	0.397193	NS
egrh-3	0.124259	16.3567	1.74984	0.0964848	0.397448	NS
tag-273	-0.444466	19.0556	-1.74981	0.0966162	0.397448	NS
mrps-16	-0.14238	20.0838	-1.74943	0.0965568	0.397448	NS
unc-60.1	0.188112	21.1868	1.74923	0.0965923	0.397448	NS
cox-6c	0.418681	19.3306	1.74924	0.0967168	0.397493	NS
csn-4	0.160352	20.3713	1.74893	0.0966457	0.397448	NS
F28C6.9	-0.16166	16.5104	-1.74792	0.096825	0.397516	NS
ggtb-1	-0.174682	18.4316	-1.74777	0.0968521	0.397516	NS
par-1	-0.146429	19.5734	-1.74748	0.0969025	0.397516	NS
T01D1.4	-0.601353	17.2463	-1.74721	0.0970766	0.397875	NS
B0280.9	-0.179163	17.3553	-1.74602	0.0971629	0.397875	NS
asm-1	-0.228222	15.8615	-1.74598	0.0971703	0.397875	NS
txt-6	-0.1884	16.6049	-1.7455	0.0972556	0.397979	NS
rsp-6	0.311204	21.6176	1.74464	0.0975186	0.398117	NS
arf-6	-0.235031	18.071	-1.74421	0.0974855	0.398117	NS
R05D11.9	-0.127447	18.5028	-1.74407	0.0975094	0.398117	NS
phb-1	0.193584	22.9996	1.74396	0.09753	0.398117	NS
Y75B8A.8	-0.143281	17.814	-1.74276	0.0977439	0.398744	NS
H21P03.2	0.234911	18.6092	1.74144	0.0979803	0.399463	NS
cwc-15	-0.125744	18.2635	-1.74109	0.0980432	0.399473	NS
mpc-1	0.18075	15.8635	1.74017	0.0982074	0.399896	NS
F10A3.17	0.395971	22.7252	1.73902	0.0985413	0.401009	NS
gei-17	0.186613	17.9802	1.73734	0.0987162	0.401474	NS
Y66D12A.8	-0.166493	17.6883	-1.73634	0.098898	0.401966	NS
bgal-1	0.17782	17.8369	1.73587	0.0989824	0.402063	NS
nep-1	-0.184776	19.5531	-1.73383	0.0993505	0.40311	NS
ZK858.5	0.178152	16.898	1.73377	0.0993619	0.40311	NS
F26E4.7	0.285094	15.9119	1.73345	0.0994509	0.403224	NS
F01F1.2	0.16816	17.7555	1.73256	0.0995814	0.403506	NS
C31C9.2	0.118772	21.8247	1.73197	0.0996884	0.403692	NS
abu-12	-0.258564	15.8563	-1.73128	0.0998151	0.403958	NS
rnp-6	-0.089332	19.0706	-1.73055	0.0999471	0.404245	NS
T05D4.2	-0.282116	16.9227	-1.73022	0.100008	0.404245	NS
Y110A7A.11	-0.142626	17.6446	-1.72846	0.100329	0.405294	NS
mbf-1	0.195183	20.8712	1.72712	0.100575	0.405446	NS
hgrs-1	0.101526	19.7324	1.72613	0.100756	0.405446	NS
tli-1	-0.198078	17.3978	-1.72605	0.10077	0.405446	NS
T23G11.7	0.316748	16.2266	1.72593	0.100854	0.405446	NS
K10B4.3	-0.127651	15.7125	-1.72551	0.10087	0.405446	NS
unc-120	-0.273153	16.4715	-1.72535	0.100899	0.405446	NS
C47E12.3	0.236627	15.5549	1.72505	0.100954	0.405446	NS
Y41D4B.6	-0.453858	18.5035	-1.72518	0.101056	0.405446	NS
lsy-13	0.225917	17.3002	1.72475	0.10101	0.405446	NS
bmy-1	0.177747	16.3129	1.72453	0.101049	0.405446	NS
M70.5	-0.183161	15.7501	-1.72439	0.101075	0.405446	NS
apl-1	-0.188269	17.1616	-1.72425	0.101101	0.405446	NS
F13D11.4	-0.3246	17.1636	-1.72368	0.101272	0.405886	NS
ify-1	0.482455	16.5427	1.7221	0.101625	0.407054	NS
Y47D3A.14	-0.176365	18.2515	-1.72042	0.101808	0.407298	NS
dnj-27	-0.217317	18.9504	-1.72042	0.101809	0.407298	NS
Y45G5AM.9	-0.279799	16.3352	-1.72	0.101885	0.407357	NS
soap-1	-0.126853	18.2663	-1.71827	0.102207	0.408397	NS
F25B4.7	0.147705	17.3019	1.71736	0.102377	0.408827	NS
C28C12.12	-0.359893	16.7746	-1.7172	0.102511	0.408868	NS
flh-3	0.251803	16.8095	1.71681	0.102478	0.408868	NS
F19B10.10	-0.288319	17.9693	-1.7161	0.102647	0.408868	NS
F11D5.1	-0.2573	16.4561	-1.71569	0.102687	0.408868	NS
F53F4.16	0.213838	15.8547	1.71565	0.102696	0.408868	NS
C04G6.4	-0.107605	15.7191	-1.71508	0.102802	0.409046	NS
daf-22	0.53277	19.8136	1.71452	0.103032	0.409469	NS
nuc-1	-0.204176	17.5028	-1.71414	0.102978	0.409469	NS
dpf-3	-0.108984	19.4127	-1.71288	0.103213	0.409943	NS
tbg-1	0.135775	19.8643	1.71002	0.10375	0.41183	NS
cdk-8	-0.140881	17.2245	-1.70966	0.103817	0.411847	NS
F13H8.5	-0.629214	16.6379	-1.70952	0.10397	0.412208	NS
rict-1	0.166146	17.0304	1.7056	0.104584	0.41426	NS
C53B4.3	0.324397	15.7703	1.7057	0.104676	0.41426	NS
prmt-1	-0.245143	22.8435	-1.70558	0.104625	0.41426	NS
pbo-4	-0.186404	15.5872	-1.70472	0.104751	0.414311	NS
rla-1	-0.274556	20.569	-1.70416	0.104935	0.414793	NS
F31E3.4	0.12983	18.3798	1.70327	0.105027	0.414906	NS
pole-4	0.374862	20.095	1.7021	0.105377	0.41557	NS
rpc-25	0.206941	17.2401	1.70163	0.10534	0.41557	NS
fkh-7	0.166519	16.4176	1.70125	0.105412	0.41557	NS
E02H9.3	0.192025	17.4088	1.70107	0.105446	0.41557	NS
F10D11.6	-0.877519	19.6287	-1.70086	0.105614	0.415736	NS
pnk-4	-0.111949	18.0147	-1.70039	0.105576	0.415736	NS
F13D12.9	-0.155324	15.7324	-1.69859	0.105921	0.416558	NS
mog-1	-0.168003	19.1023	-1.69844	0.105948	0.416558	NS
Y87G2A.13	0.181178	19.052	1.69762	0.106105	0.416928	NS
txdc-9	-0.308641	19.1429	-1.69769	0.106199	0.41705	NS
F02A9.10	0.172396	20.5418	1.69574	0.106467	0.417853	NS
gst-10	-0.730539	17.4221	-1.69526	0.106686	0.418113	NS
lin-11	-0.119932	15.4969	-1.69428	0.106748	0.418113	NS
T08G11.3	-0.128512	15.4308	-1.69423	0.106758	0.418113	NS
Y41D4B.4	0.169938	17.374	1.69409	0.106786	0.418113	NS
ZC374.2	-0.538253	18.8835	-1.69318	0.107087	0.418337	NS
mdt-31	-0.160629	16.0215	-1.69289	0.107017	0.418337	NS
T19C3.2	-0.528159	18.0278	-1.69266	0.107189	0.418337	NS
R57.2	-0.385956	16.6247	-1.69212	0.107282	0.418337	NS
fbxc-18	-0.191792	15.9838	-1.69174	0.10724	0.418337	NS
F58H1.8	-0.300769	16.454	-1.69167	0.107283	0.418337	NS
F57C9.4	0.130412	17.8264	1.69033	0.107513	0.418337	NS
Y39E4B.5	0.884071	17.7609	1.69032	0.107643	0.418337	NS
soc-2	-0.484654	17.2339	-1.69016	0.107673	0.418337	NS
T01D3.3	-0.105767	15.6475	-1.68979	0.107618	0.418337	NS
dlc-2	0.414119	17.1917	1.68931	0.107838	0.418337	NS
pdha-1	-0.121237	21.0898	-1.68911	0.107749	0.418337	NS
trpl-2	-0.14243	15.438	-1.68895	0.10778	0.418337	NS
R05D3.8	-0.154935	15.8546	-1.68884	0.107803	0.418337	NS
Y48G10A.1	0.207471	19.9946	1.6888	0.107811	0.418337	NS
F13D12.5	0.382105	17.2942	1.68858	0.10798	0.418337	NS
Y53H1A.2	0.22975	16.3154	1.68822	0.107922	0.418337	NS
mrps-35	-0.111828	19.226	-1.68812	0.107943	0.418337	NS
siah-1	-0.362863	17.4619	-1.68747	0.108184	0.418638	NS
spt-5	-0.140538	19.147	-1.68707	0.108148	0.418638	NS
unc-41	-0.16293	15.4294	-1.68608	0.10834	0.418935	NS
tsp-8	-0.279368	15.5445	-1.68603	0.108453	0.418935	NS
smcl-1	-0.167972	16.3433	-1.68553	0.108447	0.418935	NS
seld-1	0.147896	15.9884	1.68519	0.108514	0.418935	NS
ttr-33	0.502019	16.1141	1.68485	0.108708	0.419439	NS
T01G9-2.1	-0.166143	17.6769	-1.68357	0.108831	0.419669	NS
rla-2	-0.351241	20.1771	-1.68265	0.109139	0.420612	NS
K10C3.5	0.273755	18.5039	1.68123	0.109333	0.421114	NS
ZK792.1	-0.161758	17.4272	-1.68018	0.109498	0.421505	NS
eat-16	-0.302311	16.8314	-1.67982	0.109599	0.421648	NS
emc-3	-0.180011	19.6244	-1.67813	0.109902	0.422399	NS
noa-1	-0.172263	18.0835	-1.67803	0.109922	0.422399	NS
sas-6	0.340755	17.1962	1.67802	0.11003	0.422567	NS
C45G9.2	0.411716	16.6278	1.67771	0.110113	0.422644	NS
sfxn-1.5	0.163505	17.7697	1.67635	0.110255	0.422833	NS
tax-6	-0.50551	18.204	-1.67602	0.110448	0.422833	NS
add-2	-0.177742	17.2139	-1.67581	0.110361	0.422833	NS
unc-73	-0.109828	17.4261	-1.67516	0.110491	0.422833	NS
vps-15	-0.14645	18.1951	-1.67509	0.110504	0.422833	NS
rps-7	-0.152329	24.1987	-1.67478	0.110567	0.422833	NS
sqt-3	-0.467205	18.2705	-1.6747	0.110709	0.42297	NS
djr-1.1	0.218265	20.9382	1.67456	0.11061	0.422833	NS
rrc-1	-0.305684	16.5574	-1.67291	0.110968	0.42358	NS
Y53F4B.21	-0.0905013	16.7814	-1.67191	0.111138	0.42358	NS
C32E8.9	0.235299	17.9917	1.67187	0.111145	0.42358	NS
kxd-1	-0.190202	16.571	-1.67176	0.111167	0.42358	NS
Y76B12C.3	-0.15625	18.8824	-1.67165	0.111189	0.42358	NS
T09B4.8	-0.160119	19.8638	-1.67104	0.111311	0.423673	NS
F56A8.8	-0.164571	15.4822	-1.67089	0.111341	0.423673	NS
F39H12.1	-0.163074	15.3049	-1.66794	0.111932	0.425228	NS
T01G1.4	0.165732	15.8061	1.66775	0.11197	0.425228	NS
oatr-1	0.217834	21.1329	1.66759	0.112003	0.425228	NS
eif-2bdelta	-0.107345	18.2814	-1.66757	0.112007	0.425228	NS
ZK418.5	0.46381	17.8035	1.66704	0.112241	0.42558	NS
tre-2	0.153723	16.1893	1.66643	0.112236	0.42558	NS
elc-1	0.143374	21.1213	1.66615	0.112293	0.42558	NS
glo-4	-0.149882	16.0512	-1.66572	0.11238	0.425667	NS
sem-4	-0.11242	15.7765	-1.66451	0.112623	0.426344	NS
C25H3.17	0.178439	15.7771	1.66415	0.112697	0.426381	NS
C24F3.2	0.145687	15.867	1.66328	0.112873	0.426801	NS
C52E4.5	-0.333955	16.3814	-1.66337	0.112959	0.426884	NS
T28F4.5	0.753142	17.0615	1.6617	0.11332	0.427971	NS
B0228.7	0.135595	20.3472	1.66079	0.113376	0.427971	NS
ZK822.2	0.163328	19.6208	1.66044	0.113447	0.427995	NS
F46C8.8	-0.516427	16.2571	-1.65744	0.114185	0.430536	NS
Y34D9A.7	0.104146	17.6131	1.65401	0.114761	0.432459	NS
F32B5.1	0.739741	17.5215	1.65377	0.114938	0.432782	NS
H14A12.3	0.186976	17.18	1.6527	0.115029	0.432782	NS
magu-4	-0.144241	16.2031	-1.6523	0.115112	0.432782	NS
vpr-1	0.152975	20.2195	1.65219	0.115134	0.432782	NS
ttr-36	-0.257781	15.99	-1.65159	0.11526	0.432782	NS
attf-2	-0.0999554	21.8271	-1.65126	0.115326	0.432782	NS
riok-2	-0.261153	19.2384	-1.65128	0.115369	0.432782	NS
mnat-1	0.146428	18.7262	1.65107	0.115365	0.432782	NS
ipla-1	0.140966	17.3727	1.64969	0.115649	0.433197	NS
C53D5.5	0.181108	19.3506	1.64967	0.115653	0.433197	NS
Y5F2A.4	0.184521	15.8827	1.64956	0.115676	0.433197	NS
F15A4.10	0.380754	16.9195	1.6493	0.115859	0.433635	NS
pmp-2	0.401516	17.729	1.64831	0.116063	0.434156	NS
C34C6.3	-0.339743	16.4495	-1.64687	0.116339	0.434943	NS
eif-3.F	-0.137095	20.5949	-1.64554	0.11651	0.435091	NS
zfh-2	-0.260753	16.3475	-1.64553	0.11651	0.435091	NS
unc-96	-0.284087	16.8008	-1.64435	0.116758	0.435725	NS
F01G4.4	0.334054	17.6744	1.6443	0.116878	0.435725	NS
F10E9.3	-0.168577	16.515	-1.64401	0.116827	0.435725	NS
H10E21.4	-0.530944	17.0915	-1.64321	0.117122	0.435901	NS
nrde-4	-0.149339	16.8938	-1.64308	0.117021	0.435901	NS
fitm-2	0.203743	17.0206	1.64263	0.117115	0.435901	NS
C14H10.3	-0.436596	17.7667	-1.64229	0.117314	0.43592	NS
EEED8.2	-0.180453	16.8098	-1.64201	0.117245	0.43592	NS
atz-1	-0.403379	16.8289	-1.64192	0.117391	0.43592	NS
ergi-2	-0.190993	16.606	-1.64157	0.117337	0.43592	NS
C05D12.5	-0.37364	17.9126	-1.64074	0.117638	0.436153	NS
spp-5	-0.507134	17.4959	-1.6393	0.117939	0.436153	NS
cdf-1	-0.139203	15.7788	-1.63913	0.117848	0.436153	NS
sacy-1	-0.103235	18.597	-1.63892	0.117891	0.436153	NS
Y97E10AR.1	-0.278692	16.1316	-1.63889	0.117928	0.436153	NS
gadr-6	-0.221135	16.1761	-1.6382	0.118042	0.436153	NS
acl-4	0.172004	16.2935	1.63775	0.118136	0.436153	NS
mdh-2	0.177467	23.2906	1.63766	0.118156	0.436153	NS
adr-1	-0.151181	20.2438	-1.63762	0.118166	0.436153	NS
met-1	-0.122235	16.8752	-1.63759	0.118171	0.436153	NS
F25B4.4	0.26303	18.3695	1.6374	0.118241	0.436153	NS
H06H21.11	-0.208254	15.498	-1.63721	0.11825	0.436153	NS
henn-1	0.173619	18.8478	1.63693	0.11831	0.436153	NS
cyk-3	0.136008	19.6546	1.63647	0.118407	0.436189	NS
F48B9.8	-0.232872	17.3128	-1.63615	0.118475	0.436189	NS
hum-2	-0.149957	16.7537	-1.63591	0.118525	0.436189	NS
num-1	-0.145989	18.0896	-1.63522	0.11867	0.436189	NS
fmo-1	-0.291105	15.9391	-1.63525	0.118762	0.436189	NS
M03C11.3	0.132974	17.8542	1.63517	0.118681	0.436189	NS
M05D6.2	0.132435	18.9353	1.63439	0.118845	0.436189	NS
prx-12	0.322965	17.6566	1.63434	0.118963	0.436189	NS
lin-5	0.314153	19.4591	1.63431	0.118979	0.436189	NS
fbxc-51	-0.243191	18.7442	-1.63398	0.118941	0.436189	NS
F23F1.5	0.17684	17.6906	1.63248	0.11925	0.436877	NS
tni-1	-0.627151	19.6429	-1.63225	0.119427	0.436877	NS
F53E10.6	-0.302114	17.6308	-1.63204	0.119446	0.436877	NS
C08F8.3	0.342545	18.6112	1.63161	0.119562	0.436877	NS
acdh-10	0.213427	22.1464	1.63127	0.119507	0.436877	NS
ugt-58	-0.126161	17.2876	-1.63109	0.119545	0.436877	NS
C17F4.7	0.544883	16.602	1.63015	0.119872	0.437412	NS
tdo-2	-0.306961	16.8266	-1.62964	0.119902	0.437412	NS
prdx-6	0.228447	19.8929	1.62939	0.119907	0.437412	NS
par-2	-0.170357	16.4921	-1.6283	0.120138	0.437814	NS
mtx-1	-0.216551	18.6375	-1.62825	0.120149	0.437814	NS
gst-16	0.216132	17.5032	1.62785	0.120234	0.437883	NS
R151.2	-0.11014	20.3617	-1.62605	0.120618	0.43904	NS
tim-1	0.331384	18.1314	1.62591	0.120766	0.439096	NS
T26G10.1	-0.188606	17.396	-1.62553	0.120731	0.439096	NS
ada-2	0.156539	18.7596	1.62403	0.121051	0.43989	NS
elo-4	-0.448227	16.6575	-1.62313	0.121374	0.440373	NS
T14B4.3	0.304994	19.3938	1.62288	0.121409	0.440373	NS
F15B9.10	0.299584	16.4715	1.62235	0.12145	0.440373	NS
Y71H2AM.1	0.13176	17.1991	1.62225	0.121434	0.440373	NS
F25H8.1	-0.196138	16.5322	-1.62038	0.121838	0.441264	NS
C25G4.2	0.31976	16.8041	1.62032	0.121936	0.441264	NS
ced-2	0.169804	17.9918	1.62022	0.121872	0.441264	NS
snpn-1	0.234997	19.0405	1.61957	0.122014	0.441264	NS
mrpl-2	-0.124001	16.9658	-1.61949	0.122029	0.441264	NS
suds-3	0.161475	16.4034	1.61599	0.122789	0.443541	NS
sec-61.b	0.227549	19.0632	1.61597	0.122793	0.443541	NS
ent-2	0.284413	18.3895	1.6147	0.123173	0.444321	NS
gst-20	-0.251781	18.6675	-1.61424	0.1232	0.444321	NS
nsun-2	-0.107028	20.275	-1.61405	0.12321	0.444321	NS
unc-71	0.140207	16.3712	1.61365	0.123297	0.444392	NS
pct-1	-0.18052	16.3678	-1.61171	0.123722	0.445682	NS
lgc-21	-0.522056	16.2431	-1.61011	0.1242	0.447161	NS
glb-1	-0.338907	17.1065	-1.60815	0.124609	0.448371	NS
acl-3	-0.136651	16.706	-1.60737	0.124672	0.448371	NS
lfe-2	-0.158646	15.6153	-1.60707	0.124739	0.448371	NS
ZK856.16	0.196115	17.4566	1.60587	0.125004	0.449078	NS
T24G10.2	-0.196229	17.7862	-1.60509	0.125175	0.449415	NS
T19H5.4	-0.171209	15.6036	-1.60464	0.125274	0.449415	NS
coa-6	0.14191	15.5372	1.60452	0.125301	0.449415	NS
sorb-1	-0.231881	15.7585	-1.60329	0.125574	0.449927	NS
cts-1	0.161714	23.229	1.60326	0.12558	0.449927	NS
B0464.6	0.159001	19.9938	1.60239	0.125774	0.450377	NS
cyk-4	-0.236241	17.3424	-1.60166	0.125935	0.450594	NS
cdc-14.1	0.125069	17.7419	1.6015	0.12597	0.450594	NS
tipn-1	0.293934	17.525	1.59991	0.126402	0.451566	NS
ZC449.2	-0.353517	16.1879	-1.59947	0.12655	0.451692	NS
ddx-23	0.10996	19.9051	1.59938	0.126442	0.451566	NS
cept-2	-0.134171	17.9853	-1.59936	0.126447	0.451566	NS
mrpl-4	-0.174904	18.2672	-1.598	0.126749	0.452159	NS
pap-1	0.128894	18.7389	1.59678	0.127021	0.452695	NS
srpa-72	-0.104427	20.9085	-1.59671	0.127036	0.452695	NS
imph-1	0.416627	18.3001	1.59648	0.127217	0.452851	NS
egl-8	-0.134183	15.9154	-1.59591	0.127215	0.452851	NS
T24B8.3	0.404074	21.0965	1.59484	0.127584	0.453112	NS
F33H2.2	-0.0942025	18.1252	-1.59438	0.127559	0.453112	NS
mrpl-28	-0.15188	19.187	-1.59431	0.127574	0.453112	NS
rad-50	0.192041	18.4902	1.59405	0.127633	0.453112	NS
pan-1	0.245221	17.1386	1.59351	0.127754	0.453112	NS
T27A3.7	0.176796	17.9577	1.59342	0.127774	0.453112	NS
dnj-22	-0.126549	16.1158	-1.59326	0.127811	0.453112	NS
cec-1	-0.230324	17.646	-1.59292	0.127887	0.453112	NS
hrpu-1	-0.127933	17.5896	-1.59283	0.127906	0.453112	NS
C14B9.8	-0.120094	16.654	-1.59245	0.127993	0.453178	NS
Y73F8A.27	0.160427	18.1638	1.59203	0.128087	0.453269	NS
flcn-1	0.189078	16.5139	1.59084	0.128354	0.453971	NS
nol-16	-0.13839	16.592	-1.58955	0.128647	0.454764	NS
lon-8	-0.50953	16.8451	-1.58908	0.128881	0.455103	NS
tag-124	-0.193148	16.4267	-1.58894	0.128784	0.455006	NS
leo-1	-0.116191	15.5607	-1.58742	0.129128	0.455734	NS
Y71H2AM.15	-0.391888	17.6782	-1.58747	0.129246	0.455906	NS
Y106G6H.6	-0.232635	17.7192	-1.58615	0.129416	0.456228	NS
C05D11.1	0.143627	20.5389	1.58589	0.129475	0.456228	NS
msh-2	0.27961	19.6086	1.58541	0.129692	0.456509	NS
tag-296	-0.172025	18.3174	-1.58531	0.129608	0.456453	NS
spcs-2	0.160737	20.1772	1.58426	0.129848	0.456613	NS
sqv-3	0.184687	17.2261	1.5842	0.12986	0.456613	NS
tag-241	-0.318941	18.4898	-1.58422	0.129976	0.45678	NS
pxd-1	0.279886	16.954	1.58294	0.130178	0.457003	NS
atg-9	-0.119979	17.6945	-1.5829	0.130157	0.457003	NS
snr-5	-0.204718	19.4618	-1.58237	0.130278	0.457054	NS
vab-19	-0.111102	15.7584	-1.5821	0.130338	0.457054	NS
K02G10.5	-0.144294	15.7031	-1.58173	0.130423	0.457054	NS
F31D4.5	-0.336272	17.4783	-1.58173	0.130537	0.457054	NS
dbr-1	-0.17532	18.5465	-1.58145	0.130487	0.457054	NS
ZK1307.1	0.319052	19.263	1.58031	0.130878	0.45776	NS
C16C8.11	-0.233687	15.5638	-1.58022	0.130799	0.457729	NS
eif-3.j	-0.143902	21.6454	-1.57933	0.130973	0.457854	NS
gei-13	-0.409983	18.8528	-1.57843	0.131307	0.458537	NS
R119.5	-0.143787	15.4803	-1.57812	0.131252	0.458537	NS
C49F8.3	-0.680844	18.3394	-1.57705	0.131625	0.459403	NS
ucr-11	0.290255	20.4845	1.57642	0.131754	0.459611	NS
F39H11.1	0.243287	16.7846	1.57548	0.131859	0.459737	NS
xpf-1	0.0918017	17.789	1.57502	0.131965	0.459863	NS
tspo-1	0.32591	20.3524	1.57501	0.132095	0.459885	NS
pqn-87	0.12901	19.8338	1.57421	0.132153	0.459885	NS
nex-1	0.3056	21.8731	1.57404	0.132318	0.459885	NS
zer-1	-0.22302	16.6588	-1.57376	0.132256	0.459885	NS
mml-1	0.15327	16.8089	1.57352	0.132311	0.459885	NS
ard-1	0.133673	20.6619	1.57261	0.132521	0.460347	NS
taf-3	0.157245	18.1771	1.57114	0.132863	0.461132	NS
ppm-2	0.164918	18.9218	1.57104	0.132886	0.461132	NS
sor-1	0.132655	16.9583	1.57069	0.132967	0.461169	NS
pyr-1	-0.199462	20.4512	-1.57025	0.133069	0.461281	NS
cerk-1	0.28649	16.9229	1.5676	0.133716	0.463188	NS
mtm-1	-0.134437	17.7939	-1.56729	0.133759	0.463188	NS
hgap-2	-0.0984948	15.7413	-1.56663	0.133914	0.463317	NS
hda-10	0.160738	17.2658	1.56641	0.133964	0.463317	NS
F33H1.4	-0.150498	20.5731	-1.56594	0.134076	0.463317	NS
Y48G8AL.7	0.160494	16.2052	1.5658	0.134107	0.463317	NS
F56G4.6	0.116191	17.8958	1.56564	0.134146	0.463317	NS
sod-2	0.226906	21.6745	1.56494	0.13434	0.463745	NS
Y57G11C.9	-0.0958806	17.5551	-1.56247	0.134888	0.465377	NS
popl-4	0.175032	16.4126	1.56201	0.134997	0.465377	NS
ned-8	0.195767	20.0481	1.5619	0.135023	0.465377	NS
rbg-1	0.14065	16.752	1.56021	0.13542	0.466119	NS
R05F9.6	-0.141397	20.9073	-1.56021	0.135421	0.466119	NS
ire-1	-0.124048	18.0528	-1.56009	0.13545	0.466119	NS
cor-1	-0.470778	17.6228	-1.55986	0.135631	0.466299	NS
Y53C10A.6	-0.117313	16.3621	-1.55927	0.135643	0.466299	NS
Y105E8A.11	0.209102	17.8523	1.55868	0.135782	0.466384	NS
T11B7.1	-0.216925	16.1471	-1.55857	0.135808	0.466384	NS
tag-229	0.189396	16.3608	1.55787	0.135974	0.466681	NS
ZK355.2	0.213304	15.8506	1.55761	0.136036	0.466681	NS
twk-8	0.261524	16.8106	1.55699	0.136182	0.466939	NS
F37F2.2	-0.111496	18.0742	-1.55635	0.136334	0.467081	NS
E01A2.2	-0.101985	19.2782	-1.55622	0.136364	0.467081	NS
mxt-1	-0.317449	15.6879	-1.55439	0.136927	0.468687	NS
zip-8	0.21136	15.6993	1.55362	0.136981	0.468687	NS
R07E5.4	-0.480154	16.2088	-1.55359	0.137116	0.468687	NS
K07A1.10	-0.116607	17.1942	-1.55316	0.137092	0.468687	NS
K04C2.3	0.354186	18.2208	1.55245	0.137389	0.469298	NS
cest-2.3	-0.181447	15.8039	-1.55171	0.137437	0.469298	NS
F36D3.1	-0.189576	17.7516	-1.5506	0.137703	0.46986	NS
uaf-1	-0.0995694	20.8291	-1.55043	0.137743	0.46986	NS
fard-1	-0.296432	17.072	-1.54992	0.137942	0.470019	NS
pbs-2	0.223478	22.6043	1.54971	0.137947	0.470019	NS
NA	-0.281015	16.3325	-1.5495	0.138003	0.470019	NS
ztf-16	-0.119334	15.3819	-1.54895	0.138099	0.470104	NS
cka-1	-0.18566	17.5227	-1.54836	0.13824	0.470341	NS
rml-5	-0.277613	19.9613	-1.54737	0.138584	0.470991	NS
fre-1	0.344668	17.6238	1.54713	0.138664	0.470991	NS
lin-28.1	-0.327677	18.3406	-1.54691	0.138715	0.470991	NS
C05C8.1	0.185819	18.2663	1.54679	0.138616	0.470991	NS
cids-2	-0.152922	18.0258	-1.5456	0.138904	0.47139	NS
unc-10	-0.24427	15.4914	-1.54507	0.139109	0.471846	NS
Y92H12BR.3	0.184283	21.7064	1.54333	0.13945	0.47276	NS
ech-4	0.155309	20.5052	1.5422	0.139723	0.473113	NS
K09E9.3	0.152435	18.3666	1.5422	0.139723	0.473113	NS
wars-2	-0.164203	17.3821	-1.54202	0.139769	0.473113	NS
epg-3	0.122938	20.5271	1.54048	0.140141	0.474129	NS
xpd-1	0.107111	17.6634	1.53982	0.140301	0.474398	NS
Y79H2A.3	0.125945	17.9021	1.53957	0.140363	0.474398	NS
apm-1	-0.30472	21.0066	-1.53811	0.140845	0.475485	NS
rps-5	0.189579	22.1268	1.5377	0.140817	0.475485	NS
dnpp-1	0.14249	19.539	1.53736	0.1409	0.475485	NS
T09A5.4	0.357778	15.6954	1.53614	0.141325	0.476624	NS
ipla-3	-0.141877	18.9824	-1.53534	0.141394	0.476624	NS
C44B7.5	0.306507	20.5036	1.53532	0.141526	0.476624	NS
sur-2	-0.121275	17.297	-1.53508	0.141458	0.476624	NS
C26B9.6	-0.1448	15.6127	-1.53412	0.141693	0.47679	NS
Y37H9A.1	-0.185237	16.0947	-1.53358	0.141825	0.47679	NS
laat-1	0.217541	18.4012	1.53333	0.141885	0.47679	NS
ints-1	-0.105769	17.7666	-1.53329	0.141896	0.47679	NS
Y53G8B.2	0.35754	17.1282	1.53333	0.142013	0.47679	NS
algn-3	0.178905	17.1332	1.53311	0.14194	0.47679	NS
C31E10.5	-0.10889	17.2893	-1.53254	0.142079	0.47679	NS
C17E7.4	0.295418	15.8341	1.53162	0.142416	0.477436	NS
F30A10.2	-0.419161	17.1653	-1.53148	0.142468	0.477436	NS
msra-1	-0.491811	17.0604	-1.53095	0.142598	0.477564	NS
Y54E10A.11	-0.149787	18.7708	-1.53088	0.142488	0.477436	NS
rpb-7	0.134215	19.0853	1.5292	0.142902	0.478338	NS
sld-2	0.225499	16.1755	1.52881	0.142998	0.47839	NS
rpb-4	0.167155	18.7217	1.52855	0.143062	0.47839	NS
F54E4.3	-0.413002	17.4647	-1.52823	0.143269	0.478838	NS
aspm-1	0.318988	18.7905	1.52794	0.14334	0.478838	NS
rme-2	0.490804	17.6156	1.52724	0.143512	0.47917	NS
Y55D5A.3	0.303309	16.0819	1.52622	0.143745	0.479647	NS
ugt-57	-0.24533	16.7167	-1.52553	0.143808	0.479647	NS
hint-1	0.279	18.7389	1.52543	0.143941	0.479647	NS
ril-1	0.137842	21.5491	1.52498	0.143945	0.479647	NS
B0507.2	0.28293	17.8646	1.52421	0.14424	0.480355	NS
fncm-1	-0.202151	15.5563	-1.52347	0.14432	0.480355	NS
tag-304	0.212113	16.4896	1.52325	0.144375	0.480355	NS
F16B12.6	0.10169	18.7012	1.52287	0.144469	0.480425	NS
mct-5	0.275029	17.5204	1.52198	0.144754	0.481134	NS
znf-207	-0.154076	18.2167	-1.52118	0.144891	0.481346	NS
pacs-1	-0.702579	17.0167	-1.52057	0.14517	0.482033	NS
npp-1	-0.246263	18.4479	-1.51937	0.145379	0.482484	NS
C35D10.1	0.173767	17.9957	1.51892	0.145454	0.482492	NS
B0395.3	0.305186	18.0535	1.51804	0.145786	0.483338	NS
C41D11.3	-0.144122	15.6056	-1.51732	0.145855	0.483338	NS
R04A9.7	-0.260978	16.2122	-1.51662	0.146061	0.48362	NS
[truncated: 4,622 more rows]

## Sheet: nuo-6 vs WT
Corrected Gene-ID	logFC	AveExpr	t	P.Value	adj.P.Val	Sig
nduf-11	-2.99309	18.2178	-20.9767	1.75543e-14	1.16227e-10	FDR
nuo-6	-2.84354	17.861	-17.6305	4.04305e-13	1.22688e-09	FDR
Y51H1A.3	-2.38021	17.7709	-17.2902	5.55904e-13	1.22688e-09	FDR
hsp-6	1.34736	23.9859	16.1264	1.89956e-12	3.14424e-09	FDR
D2030.4	-1.8775	18.9611	-15.684	3.09287e-12	4.09558e-09	FDR
C16A3.5	-2.22508	20.0772	-15.2075	5.39907e-12	5.95787e-09	FDR
scyl-1	-1.12883	17.6142	-14.2124	1.71294e-11	1.6202e-08	FDR
C18E9.4	-2.03353	19.273	-13.7684	3.00515e-11	2.48713e-08	FDR
aldo-1	5.36498	20.5872	13.4434	4.9603e-11	3.64912e-08	FDR
F56C11.3	1.38322	16.8021	12.5872	1.36008e-10	9.00509e-08	FDR
nuo-1	-2.10223	20.4615	-12.4909	1.67948e-10	1.01089e-07	FDR
mtch-1	-1.69145	20.4624	-12.2113	2.26454e-10	1.24946e-07	FDR
F59C6.5	-1.90013	20.6665	-12.1734	2.48253e-10	1.26437e-07	FDR
K11H12.8	1.25538	20.8525	12.0435	2.85466e-10	1.35005e-07	FDR
Y39B6A.3	1.01141	17.0714	11.4182	6.92359e-10	3.05607e-07	FDR
qdpr-1	1.47508	18.1527	10.9494	1.37854e-09	5.70459e-07	FDR
B0035.15	0.715805	21.2363	10.505	2.70337e-09	1.05288e-06	FDR
xdh-1	2.1872	17.4644	10.4559	3.12689e-09	1.15017e-06	FDR
Y38E10A.24	-2.0154	18.2038	-10.3773	3.52864e-09	1.19533e-06	FDR
ndx-2	1.36098	15.7267	10.3181	3.61071e-09	1.19533e-06	FDR
C34C12.8	0.88068	20.5153	10.2342	4.11693e-09	1.29801e-06	FDR
C25H3.9	-1.04064	16.1534	-10.0023	5.93952e-09	1.78753e-06	FDR
Y69A2AR.3	-1.47813	17.8264	-9.9067	6.9209e-09	1.99232e-06	FDR
ldh-1	2.33072	22.8525	9.8327	8.39342e-09	2.31553e-06	FDR
Y94H6A.8	-1.79942	21.1248	-9.65136	1.11706e-08	2.95841e-06	FDR
tin-44	0.647852	18.979	9.49342	1.35626e-08	3.34157e-06	FDR
lpd-9	-1.72877	18.4178	-9.5262	1.36267e-08	3.34157e-06	FDR
ckb-2	-1.41628	17.2932	-9.30088	1.86818e-08	4.41757e-06	FDR
F44G4.2	-1.54799	17.5527	-9.25127	2.06318e-08	4.71045e-06	FDR
C50D2.9	0.680248	18.6842	9.18358	2.27552e-08	4.90588e-06	FDR
lonp-1	0.641876	20.5004	9.17803	2.29697e-08	4.90588e-06	FDR
C37A5.7	1.52277	16.5463	8.99517	3.13474e-08	6.48598e-06	FDR
Y43F8B.2	1.09989	17.0068	8.686	5.35295e-08	1.074e-05	FDR
lin-66	-0.559148	19.5549	-8.53064	7.0361e-08	1.37018e-05	FDR
Y71H2AM.4	-1.41027	17.0821	-8.28497	1.09212e-07	2.06599e-05	FDR
cisd-3.2	-1.03562	17.6803	-8.24907	1.16398e-07	2.14076e-05	FDR
Y54G11A.9	0.934146	17.0204	8.23119	1.20221e-07	2.1513e-05	FDR
nuo-5	-1.17756	21.1836	-8.21299	1.25298e-07	2.18315e-05	FDR
nduf-6	-1.73425	17.4034	-8.16814	1.41509e-07	2.40239e-05	FDR
pdi-6	-0.930289	21.2689	-8.1121	1.49248e-07	2.47043e-05	FDR
cht-1	1.05236	21.0844	8.02645	1.74565e-07	2.81901e-05	FDR
nft-1	0.7129	17.511	7.98759	1.87487e-07	2.9556e-05	FDR
ZK809.3	-1.35762	20.7038	-7.9901	1.95219e-07	3.00592e-05	FDR
fgt-1	1.42886	19.7296	7.96757	2.03549e-07	3.06295e-05	FDR
spg-7	0.67692	20.787	7.92377	2.10906e-07	3.10313e-05	FDR
F53F4.10	-1.17383	19.5442	-7.85121	2.44291e-07	3.5162e-05	FDR
cux-7	-0.804458	17.1885	-7.80321	2.63812e-07	3.71638e-05	FDR
plp-1	0.419087	22.8718	7.78175	2.74588e-07	3.7876e-05	FDR
F54F7.2	1.61371	15.9788	7.72722	3.19106e-07	4.31184e-05	FDR
hxk-1	1.43793	16.989	7.65764	3.53816e-07	4.68524e-05	FDR
ppgn-1	0.500326	18.3049	7.62434	3.69033e-07	4.7176e-05	FDR
C34B2.8	-1.10473	18.1416	-7.62222	3.70511e-07	4.7176e-05	FDR
C16H3.3	-1.01839	17.4464	-7.57278	4.06846e-07	5.01564e-05	FDR
gphr-1	0.7303	16.6176	7.5699	4.09069e-07	5.01564e-05	FDR
clpf-1	0.602785	19.1654	7.52588	4.44735e-07	5.3538e-05	FDR
haf-3	0.88245	19.2547	7.49732	4.69578e-07	5.46093e-05	FDR
ipgm-1	0.813845	21.4718	7.49128	4.75012e-07	5.46093e-05	FDR
aco-2	0.644449	23.5535	7.48758	4.78378e-07	5.46093e-05	FDR
Y32F6A.5	0.937751	19.7259	7.47264	4.92211e-07	5.52361e-05	FDR
Y49F6C.8	-1.87859	17.8266	-7.47429	5.15038e-07	5.68344e-05	FDR
nuo-2	-1.64362	19.6474	-7.38529	6.10115e-07	6.62225e-05	FDR
dhs-19	1.12422	18.9917	7.35196	6.27289e-07	6.69884e-05	FDR
Y48A5A.3	0.477878	17.1948	7.33586	6.39859e-07	6.72462e-05	FDR
C46C2.2	1.07319	18.9042	7.30951	6.73647e-07	6.96909e-05	FDR
M01F1.4	0.852055	19.2862	7.28213	7.09817e-07	7.23031e-05	FDR
nduo-5	-2.3877	18.0058	-7.29589	7.24093e-07	7.26397e-05	FDR
Y106G6D.5	0.535017	16.9072	7.25286	7.51212e-07	7.42354e-05	FDR
ZK370.4	0.672119	16.9785	7.24508	7.62628e-07	7.42553e-05	FDR
F42H10.6	0.843867	18.1197	7.18632	8.54888e-07	8.19103e-05	FDR
lpd-5	-1.70352	18.5144	-7.20306	8.6599e-07	8.19103e-05	FDR
ctsa-1.1	0.817658	22.3789	7.11072	9.90889e-07	9.24039e-05	FDR
Y47G6A.22	0.975401	20.063	7.10252	1.00692e-06	9.25944e-05	FDR
R102-4	1.42813	17.558	7.08982	1.07144e-06	9.7178e-05	FDR
gfm-1	0.528212	19.606	6.9962	1.241e-06	0.000111036	FDR
hoe-1	0.61152	18.0682	6.97044	1.30578e-06	0.000115275	FDR
acer-1	0.685587	22.7274	6.95349	1.3503e-06	0.000117636	FDR
gas-1	-1.31144	19.7195	-6.95076	1.41134e-06	0.000121357	FDR
T07D3.9	0.436748	18.6803	6.92395	1.43168e-06	0.000121528	FDR
Y54F10AM.5	-1.02629	19.6346	-6.91447	1.47348e-06	0.000123493	FDR
Y54G11A.7	0.818186	16.2241	6.86573	1.60726e-06	0.00013267	FDR
F54D5.7	0.603663	20.2035	6.85664	1.63661e-06	0.00013267	FDR
trxr-2	0.534988	16.6891	6.85466	1.6431e-06	0.00013267	FDR
nduf-2.2	-2.60481	19.333	-6.82385	1.82093e-06	0.000145257	FDR
Y63D3A.7	-0.912541	21.5468	-6.71702	2.16428e-06	0.000170592	FDR
adss-1	0.751497	21.2059	6.68539	2.30661e-06	0.000179671	FDR
tsfm-1	0.735655	18.8819	6.64757	2.48949e-06	0.000191662	FDR
F48E8.3	0.579079	21.3143	6.55886	2.97972e-06	0.000226767	FDR
nduf-5	-1.26275	19.2099	-6.55626	3.10179e-06	0.000230752	FDR
kat-1	0.498156	21.9641	6.54098	3.09006e-06	0.000230752	FDR
sams-3	-1.09573	20.9578	-6.53563	3.22257e-06	0.000237073	FDR
tbh-1	1.42553	21.4814	6.52367	3.32497e-06	0.000241919	FDR
C44B7.5	1.29757	20.5036	6.49967	3.49078e-06	0.000248521	FDR
F10E7.6	0.628237	17.7436	6.48196	3.48509e-06	0.000248521	FDR
kdp-1	1.3562	20.0341	6.49276	3.54006e-06	0.000249348	FDR
cox-5A	0.986423	22.0164	6.38456	4.34975e-06	0.000303155	FDR
fbxa-153	0.883938	17.0356	6.32616	4.79856e-06	0.000330951	FDR
skr-1	-0.626105	20.1856	-6.29819	5.08388e-06	0.000347014	FDR
F19B6.1	-0.501579	19.4968	-6.27798	5.30083e-06	0.000358131	FDR
C13B9.2	0.656322	16.9082	6.2594	5.50873e-06	0.000368417	FDR
DC2.5	1.46943	16.8758	6.26694	5.61795e-06	0.000371964	FDR
mmcm-1	0.42612	20.3055	6.23828	5.7553e-06	0.000377286	FDR
ZC506.1	-0.4435	16.7736	-6.20854	6.1219e-06	0.000397383	FDR
cox-5b	1.31514	18.8714	6.20472	6.38776e-06	0.000410615	FDR
F14H3.5	-0.635143	16.326	-6.1379	7.09227e-06	0.000451518	FDR
pho-14	0.878215	20.1545	6.10941	7.53985e-06	0.000475442	FDR
glrx-5	0.458247	20.5227	6.03547	8.7891e-06	0.000546538	FDR
alh-6	0.872281	20.4124	6.03194	8.89706e-06	0.000546538	FDR
rpom-1	0.539561	17.4802	6.0287	8.91498e-06	0.000546538	FDR
moc-2	0.579648	16.7515	5.98572	9.75895e-06	0.000592789	FDR
Y73F4A.1	0.964243	18.5095	5.95833	1.04337e-05	0.000625395	FDR
alkb-7	0.642558	16.4445	5.94867	1.0552e-05	0.000625395	FDR
emb-8	0.433275	20.0325	5.94746	1.05791e-05	0.000625395	FDR
semo-1	0.942209	17.5064	5.91611	1.13039e-05	0.000662329	FDR
C33A12.1	-1.29845	20.7023	-5.92063	1.15549e-05	0.000671095	FDR
cyp-44A1	-0.664912	18.6266	-5.79813	1.4521e-05	0.000836033	FDR
C47E12.2	0.680795	24.1639	5.79111	1.474e-05	0.000841321	FDR
sna-2	-0.350338	19.2112	-5.78142	1.50478e-05	0.000851195	FDR
ugt-61	0.945038	16.5967	5.77762	1.51701e-05	0.000851195	FDR
gcst-1	0.640919	19.9221	5.74294	1.63356e-05	0.000908893	FDR
F23H11.5	0.900888	18.2318	5.73617	1.66685e-05	0.000919684	FDR
ptc-1	0.8277	17.3294	5.70203	1.78301e-05	0.000975645	FDR
ard-1	0.480472	20.6619	5.65256	1.98257e-05	0.00107068	FDR
ZK673.2	0.751878	19.9055	5.65104	1.98903e-05	0.00107068	FDR
coq-8	0.470036	18.8272	5.6407	2.03375e-05	0.00108592	FDR
lact-4	1.4393	18.9326	5.61979	2.18845e-05	0.00115918	FDR
F45H10.3	-1.6282	20.7768	-5.57368	2.41584e-05	0.0012643	FDR
D1007.10	0.642288	16.0302	5.55899	2.42509e-05	0.0012643	FDR
ppw-1	-0.704631	20.2893	-5.54886	2.4787e-05	0.00128215	FDR
mthf-1	-1.21394	18.3881	-5.53798	2.60843e-05	0.00133879	FDR
Y45F3A.9	0.600417	18.1617	5.50078	2.75032e-05	0.00139776	FDR
cox-6A	0.595616	19.3335	5.49823	2.76555e-05	0.00139776	FDR
F36A2.7	1.09468	21.8396	5.50409	2.80579e-05	0.00140736	FDR
dnj-10.1	0.462739	18.6015	5.4824	2.862e-05	0.00142476	FDR
Y39G10AR.11	-0.457521	17.9523	-5.47064	2.93594e-05	0.00145066	FDR
ZC373.5	0.590996	16.0638	5.45981	3.00569e-05	0.00147412	FDR
nars-2	0.505943	17.2154	5.44725	3.0888e-05	0.00149978	FDR
ckb-4	0.477216	17.2482	5.44509	3.1033e-05	0.00149978	FDR
W01A11.1	0.366768	20.0479	5.42986	3.20771e-05	0.001539	FDR
lys-1	1.75088	19.1945	5.41676	3.38812e-05	0.00160234	FDR
fum-1	0.418523	21.9802	5.40519	3.38448e-05	0.00160234	FDR
acdh-11	0.537853	19.4138	5.38876	3.50767e-05	0.00164711	FDR
uggt-1	-0.362956	20.0067	-5.37944	3.57961e-05	0.0016591	FDR
hsp-3	-0.54446	23.3657	-5.37897	3.58331e-05	0.0016591	FDR
rips-1	1.84176	18.9446	5.38021	3.66731e-05	0.0016862	FDR
ZK1098.11	0.458915	18.7523	5.35808	3.75026e-05	0.00171245	FDR
ilcr-2	-0.533746	17.3407	-5.35151	3.80439e-05	0.00172526	FDR
cyc-2.1	0.600185	21.7635	5.34444	3.8635e-05	0.00174015	FDR
tgs-1	-0.39709	17.8812	-5.3355	3.93969e-05	0.00176248	FDR
R04B3.2	0.719362	18.8732	5.30881	4.17621e-05	0.0018452	FDR
tufm-1.	0.492287	22.472	5.30836	4.18034e-05	0.0018452	FDR
bud-31	-0.555691	19.0505	-5.29937	4.26336e-05	0.00186939	FDR
ins-34	-1.23097	16.3768	-5.29743	4.39005e-05	0.00191227	FDR
nprt-1	0.621267	19.518	5.2784	4.46355e-05	0.00192199	FDR
ZK353.9	0.435251	19.4343	5.2777	4.47041e-05	0.00192199	FDR
dom-3	0.467787	17.0692	5.27453	4.50151e-05	0.00192287	FDR
sart-3	-0.414795	19.6996	-5.22085	5.06383e-05	0.00214921	FDR
acs-13	-0.457241	21.0066	-5.20339	5.2618e-05	0.00221901	FDR
nlp-28	1.50138	19.2626	5.21068	5.30478e-05	0.00222297	FDR
T16G1.9	-0.319447	18.7304	-5.18682	5.45687e-05	0.00226827	FDR
fusm-2	0.468585	17.5486	5.18146	5.52164e-05	0.00226827	FDR
W07E11.1	-0.421039	21.3637	-5.17721	5.57347e-05	0.00226827	FDR
W10C8.5	0.946324	15.6977	5.18275	5.61767e-05	0.00226827	FDR
prmt-1	-0.744125	22.8435	-5.17724	5.61119e-05	0.00226827	FDR
Y37E3.17	0.48273	21.8358	5.17356	5.61842e-05	0.00226827	FDR
clk-1	0.579824	17.4782	5.15603	5.8394e-05	0.00234108	FDR
rars-2	0.430593	18.2169	5.1537	5.86949e-05	0.00234108	FDR
F56B3.11	-0.378881	19.2339	-5.12973	6.18777e-05	0.00245325	FDR
dhs-11	0.58232	20.5666	5.11075	6.45227e-05	0.00254289	FDR
gpd-2	1.52936	22.0313	5.10926	6.62523e-05	0.0025956	FDR
T20H4.5	-1.71378	17.8593	-5.08634	6.96746e-05	0.00271362	FDR
repo-1	-0.35487	17.481	-5.06768	7.09624e-05	0.0027379	FDR
enol-1	0.472454	23.7047	5.06664	7.1125e-05	0.0027379	FDR
Y73F8A.27	0.5093	18.1638	5.05415	7.3117e-05	0.00279802	FDR
M199.2	0.727634	17.0182	5.05159	7.35321e-05	0.00279802	FDR
Y111B2A.2	0.979554	18.4222	5.03937	7.70359e-05	0.0029146	FDR
cox-4	0.781188	22.7415	5.03346	7.79238e-05	0.00293144	FDR
wdr-4	-0.478663	21.1379	-5.02125	7.86393e-05	0.00294164	FDR
glh-2	-0.634305	18.329	-5.01682	7.94157e-05	0.00295399	FDR
ZK550.6	0.895217	18.7587	5.01173	8.18107e-05	0.00302608	FDR
smi-1	0.541901	17.4282	4.99836	8.27312e-05	0.00304313	FDR
nduf-9	-1.17591	20.8412	-5.00449	8.34395e-05	0.00305223	FDR
letm-1	0.396365	18.9384	4.98875	8.45132e-05	0.00307452	FDR
asp-4	0.699031	20.0885	4.98339	8.55245e-05	0.0030943	FDR
ubh-1	0.602235	17.6863	4.98055	8.60634e-05	0.00309688	FDR
perm-4	-2.49547	18.3363	-4.98001	8.80736e-05	0.0031391	FDR
Y105C5B.19	0.78732	18.2767	4.97191	8.81849e-05	0.0031391	FDR
ZC434.8	0.776197	23.3391	4.96501	9.06768e-05	0.00321054	FDR
Y87G2A.13	0.52749	19.052	4.94254	9.36431e-05	0.00329793	FDR
pfkb-1.2	0.387524	16.8333	4.93421	9.5392e-05	0.00334175	FDR
F47B7.2	-0.52324	18.098	-4.89858	0.00010326	0.0035883	FDR
cox-19	0.890951	17.42	4.90158	0.000103514	0.0035883	FDR
Y57A10A.13	0.481914	18.3239	4.87228	0.000109488	0.0037675	FDR
vps-41	0.300615	17.1902	4.87091	0.000109821	0.0037675	FDR
har-1	1.35412	19.2953	4.86246	0.000114255	0.00389941	FDR
acox-3	1.14245	18.0928	4.83999	0.000120098	0.00407778	FDR
pcp-5	0.668873	19.6823	4.82186	0.000122516	0.00413865	FDR
coq-5	0.36193	18.3318	4.80588	0.000126967	0.00426724	FDR
vit-2	0.694444	27.1975	4.80554	0.000129171	0.0043194	FDR
T23G7.3	-0.294805	15.7637	-4.78944	0.000131718	0.00436768	FDR
nuo-3	-0.686649	18.317	-4.7887	0.000131934	0.00436768	FDR
lars-2	0.488125	18.3455	4.78511	0.000132997	0.00438095	FDR
F27C1.2	0.663525	17.1357	4.77459	0.000136163	0.00446305	FDR
pigk-1	0.639501	17.9534	4.76368	0.000139525	0.00453414	FDR
aph-1	0.413369	17.0344	4.76311	0.000139702	0.00453414	FDR
T21B10.3	0.328795	18.3373	4.75408	0.000142554	0.00458243	FDR
cyn-13	-0.335917	17.5998	-4.75402	0.000142574	0.00458243	FDR
K12H4.5	-1.63953	19.5132	-4.75675	0.000144527	0.00462278	FDR
dhs-6	0.567636	21.0808	4.73024	0.000150366	0.00478642	FDR
Y59A8B.8	0.352577	19.7776	4.69878	0.000161347	0.00511138	FDR
C13G5.2	-0.670941	16.3211	-4.69517	0.000162657	0.00512833	FDR
R119.2	0.459425	17.7524	4.68259	0.000167312	0.00525012	FDR
tufm-2	0.512212	19.1789	4.677	0.000169421	0.00528108	FDR
nuaf-3	0.373742	17.4558	4.67482	0.000170253	0.00528108	FDR
hpo-10	-0.434078	18.1526	-4.67367	0.000170692	0.00528108	FDR
nduo-1	-1.55814	18.4524	-4.67503	0.000173429	0.0052904	FDR
ZK185.3	0.621015	15.9442	4.66494	0.00017407	0.0052904	FDR
C06B8.7	0.743992	18.0521	4.66516	0.000174756	0.0052904	FDR
F29B9.1	0.548156	17.2642	4.66288	0.000174874	0.0052904	FDR
fcp-1	0.261293	19.7325	4.66259	0.000174988	0.0052904	FDR
Y71F9AL.9	-0.405245	21.9662	-4.65954	0.000176191	0.00529358	FDR
eif-2alpha	0.33572	21.8663	4.65827	0.000176692	0.00529358	FDR
B0495.5	0.321271	18.1049	4.65547	0.000177807	0.00530299	FDR
K02B12.7	-0.29953	18.1305	-4.64852	0.000180602	0.00536219	FDR
pcs-1	0.53697	15.8453	4.64464	0.000182181	0.00538492	FDR
C17C3.1	1.13919	19.6113	4.63714	0.000188754	0.00554553	FDR
cnt-1	-0.373793	17.8959	-4.6276	0.00018929	0.00554553	FDR
tbca-1	0.513685	17.9098	4.61997	0.000192563	0.00560626	FDR
nmrk-1	0.575384	16.3689	4.61766	0.000193566	0.00560626	FDR
sop-3	-0.30746	17.2537	-4.61688	0.000193903	0.00560626	FDR
icl-1	1.19739	22.564	4.62262	0.000194989	0.00561315	FDR
perm-2	-1.90877	17.767	-4.6025	0.000203966	0.00584615	FDR
K07E3.1	-0.300679	16.8098	-4.58998	0.000205994	0.00585043	FDR
emb-4	-0.339067	21.2205	-4.58658	0.000207571	0.00585043	FDR
nuaf-1	-0.365051	16.7519	-4.58524	0.000208202	0.00585043	FDR
F44B9.5	0.375388	16.9316	4.58457	0.000208515	0.00585043	FDR
W09H1.5	0.422219	20.5118	4.58314	0.000209187	0.00585043	FDR
nuo-4	-0.590036	20.4068	-4.58265	0.000209417	0.00585043	FDR
Y73C8B.3	0.82382	16.9542	4.57909	0.000212002	0.00587308	FDR
F46B6.6	0.42148	17.015	4.57739	0.000211908	0.00587308	FDR
F23C8.5	0.423464	22.0703	4.56802	0.000216423	0.00597056	FDR
F58A6.1	1.97423	17.5708	4.57046	0.000219144	0.00599774	FDR
gst-18	1.45782	18.4271	4.57031	0.00021922	0.00599774	FDR
dgat-2	1.28373	16.5063	4.56385	0.000222414	0.00603932	FDR
rnst-2	0.429658	20.0883	4.55559	0.000222564	0.00603932	FDR
mif-2	0.973556	19.1736	4.55213	0.000228334	0.00617061	FDR
rnp-3	-0.33632	20.9697	-4.54136	0.000229807	0.00618517	FDR
morc-1	-0.360069	18.1549	-4.53273	0.000234322	0.00628115	FDR
eif-2A	-0.690173	20.8722	-4.52362	0.000240425	0.00639416	FDR
nhr-46	-0.520004	17.0998	-4.52123	0.000240469	0.00639416	FDR
C37H5.13	0.905621	17.9401	4.52543	0.00024187	0.00640569	FDR
F29B9.11	0.856274	20.0774	4.51259	0.000249115	0.00654521	FDR
C25A1.1	0.371527	17.3949	4.50703	0.000248289	0.00654521	FDR
ltah-1.1	0.557336	19.8699	4.50047	0.00025199	0.00659456	FDR
F33E11.3	-0.445982	18.2512	-4.49018	0.000257901	0.00672268	FDR
txdc-17	0.593457	20.0401	4.48454	0.000261202	0.00678205	FDR
gro-1	0.485416	17.613	4.4816	0.000262937	0.00680042	FDR
ule-4	1.2889	17.0207	4.48568	0.000265055	0.00682851	FDR
cth-2	1.13624	18.3622	4.47345	0.000272439	0.00696454	FDR
bre-4	0.392084	16.2444	4.46604	0.000272331	0.00696454	FDR
atm-1	0.430974	18.3642	4.46143	0.000275181	0.00700759	FDR
algn-10	0.422757	17.7177	4.45636	0.000278345	0.00706102	FDR
gst-13	1.21048	17.4571	4.45569	0.000283528	0.0071378	FDR
rps-6	-0.236284	24.8649	-4.44856	0.000283292	0.0071378	FDR
glp-4	-0.425944	21.734	-4.44505	0.000285545	0.00716133	FDR
pigs-1	0.380756	18.1651	4.43998	0.000288828	0.00721633	FDR
F02E9.7	-0.562048	16.6514	-4.43629	0.000291245	0.00724938	FDR
mtrr-1	0.371149	19.8428	4.41804	0.0003035	0.00752131	FDR
ccar-1	-0.339335	19.6952	-4.41667	0.000304442	0.00752131	FDR
top-1	-0.350279	19.6643	-4.41019	0.000308927	0.00759282	FDR
D2023.6	0.368696	16.927	4.40914	0.000309663	0.00759282	FDR
ubc-3	-0.574942	17.9889	-4.40755	0.000310777	0.00759282	FDR
ZK858.5	0.451045	16.898	4.38957	0.000323666	0.00787864	FDR
F55G11.8	0.795146	16.0329	4.39121	0.000326173	0.00791058	FDR
R11D1.10	0.313997	16.7564	4.37968	0.000330982	0.00799793	FDR
Y42A5A.5	0.59297	17.1568	4.37694	0.000333033	0.00801823	FDR
rfk-1	0.512078	17.4439	4.36663	0.000340887	0.00817759	FDR
pps-1	-0.554015	17.188	-4.362	0.000344476	0.00823385	FDR
Y53F4B-39.1	0.700209	17.8157	4.35821	0.000348258	0.00829431	FDR
snx-3	-0.294587	19.973	-4.3478	0.000355723	0.00844172	FDR
cyp-13B1	1.403	17.0817	4.34604	0.00036289	0.00855051	FDR
C27D8.4	0.492717	19.6774	4.33953	0.000362438	0.00855051	FDR
sek-3	0.447427	16.202	4.33705	0.000364474	0.00855739	FDR
snr-2	-0.285959	22.6681	-4.33399	0.00036701	0.00858648	FDR
ire-1	-0.344191	18.0528	-4.3287	0.000371426	0.0086592	FDR
spp-10	0.648789	20.7865	4.32743	0.000373894	0.00868615	FDR
gly-9	-0.526095	17.3788	-4.3143	0.000383735	0.0088836	FDR
faah-4	0.463773	19.0828	4.31254	0.000385265	0.00888794	FDR
F27D4.1	0.419341	23.114	4.31047	0.000387073	0.00889864	FDR
marb-1	0.668952	19.0778	4.29222	0.000404881	0.00927585	FDR
M05D6.5	0.47549	16.7961	4.28355	0.000411395	0.00939257	FDR
D2030.2	0.407716	19.8808	4.27804	0.000416567	0.00947797	FDR
hpo-40	0.631138	17.9645	4.27484	0.000419591	0.00951408	FDR
coa-6	0.377682	15.5372	4.27029	0.000423939	0.00957987	FDR
F37H8.5	0.701227	21.405	4.26833	0.00043116	0.00970989	FDR
M04B2.2	0.400748	15.9801	4.25911	0.000434812	0.00972628	FDR
sut-2	-0.308049	18.9124	-4.25885	0.000435072	0.00972628	FDR
cua-1	0.370155	17.3563	4.25761	0.000436294	0.00972628	FDR
dld-1	0.352327	20.4812	4.24628	0.000447642	0.00994576	FDR
fubl-3	-0.429053	19.2946	-4.24005	0.000454005	0.0100534	FDR
mdt-15	-0.228025	17.9692	-4.23811	0.000455999	0.0100639	FDR
ruvb-1	-0.245148	21.7916	-4.23353	0.000460758	0.0101352	FDR
mog-2	-0.333692	21.1055	-4.23171	0.000462667	0.0101404	FDR
W03F9.1	-0.424197	19.2596	-4.23038	0.000464058	0.0101404	FDR
tin-10	0.44291	18.9071	4.2232	0.000471677	0.0102729	FDR
mif-1	1.02807	17.4768	4.22245	0.000479562	0.0104104	FDR
tsn-1	-0.325455	23.5895	-4.1937	0.000504292	0.0109115	FDR
stl-1	0.512798	21.0416	4.19008	0.000508449	0.0109656	FDR
trx-2	1.04483	17.4731	4.19057	0.000515367	0.0110787	FDR
dph-7	0.676021	16.7013	4.18129	0.000518692	0.0111141	FDR
glod-4	0.494642	20.3874	4.17273	0.000528858	0.0112954	FDR
R53.5	0.602504	19.9754	4.17054	0.00053202	0.0113264	FDR
daf-4	-0.255327	16.8918	-4.15463	0.000551023	0.0116611	FDR
Y110A7A.11	0.342808	17.6446	4.15444	0.000551265	0.0116611	FDR
pno-1	-0.384825	21.065	-4.13972	0.000569987	0.0120187	FDR
Y110A7A.7	-0.313482	15.563	-4.1381	0.000572073	0.0120244	FDR
W01D2.1	-0.335365	21.1452	-4.13543	0.000575554	0.0120593	FDR
acdh-12	0.335145	23.4993	4.12773	0.000585694	0.0121747	FDR
erp-44.1	0.331307	21.2424	4.12749	0.000586019	0.0121747	FDR
rsp-7	-0.295617	19.026	-4.12707	0.000586579	0.0121747	FDR
K08D12.3	-0.536975	21.4706	-4.12038	0.000595547	0.0123222	FDR
T28B8.1	0.931458	16.5889	4.12206	0.000600788	0.012392	FDR
syf-1	-0.266817	19.6304	-4.11229	0.000606589	0.0124728	FDR
phb-2	0.325189	22.7722	4.10166	0.000621393	0.0127376	FDR
dlc-2	1.00543	17.1917	4.10144	0.000630392	0.0128032	FDR
spk-1	-0.345493	18.6031	-4.09654	0.000628653	0.0128032	FDR
kin-10	-0.269884	19.7194	-4.09573	0.00062981	0.0128032	FDR
zfp-3	-0.356189	17.2057	-4.08641	0.000643279	0.0130199	FDR
pafo-1	-0.290908	19.1304	-4.08524	0.000644996	0.0130199	FDR
rbm-22	-0.250735	19.0103	-4.08135	0.000650711	0.0130953	FDR
pcf-11	-0.309927	18.9921	-4.06814	0.000670524	0.0134531	FDR
C36B7.6	-0.343816	18.3656	-4.06447	0.000676131	0.0135247	FDR
eri-5	0.443528	16.864	4.05539	0.000690213	0.0137648	FDR
C50F4.12	0.409509	16.1628	4.05078	0.000697469	0.0138677	FDR
M01E5.2	0.310462	16.3416	4.0474	0.000702858	0.013933	FDR
C24H12.4	-0.386478	17.5925	-4.04599	0.000705105	0.0139358	FDR
C35D10.5	0.356211	17.684	4.0433	0.000709429	0.0139796	FDR
Y47G6A.21	0.515299	19.2767	4.03624	0.000720894	0.0141633	FDR
F25B4.7	0.346695	17.3019	4.031	0.000729514	0.0142903	FDR
Y11D7A.7	0.567226	16.8257	4.02664	0.000736778	0.0143658	FDR
fubl-1	-0.329119	19.5351	-4.02608	0.00073771	0.0143658	FDR
mrps-22	-0.275188	19.5635	-4.02223	0.000744184	0.0144494	FDR
trx-4	0.475857	18.6079	4.01742	0.000752364	0.0145655	FDR
bed-1	0.401934	17.1217	4.00937	0.000766249	0.0147911	FDR
erl-1	0.531338	18.5091	4.00523	0.000773484	0.0148873	FDR
jmjd-2	-0.427211	17.5309	-3.99858	0.000785253	0.01507	FDR
Y67D8A.2	0.282776	16.5625	3.99452	0.000792526	0.0151656	FDR
far-3	1.99652	18.6959	3.99824	0.000796157	0.0151912	FDR
imp-3	0.401307	17.5375	3.98748	0.000805288	0.0153213	FDR
romo-1	0.532776	18.9792	3.98515	0.000809566	0.0153585	FDR
nduf-7	-1.48962	20.0572	-3.9851	0.00082018	0.0154885	FDR
hsp-60	0.387055	23.4732	3.97892	0.000821095	0.0154885	FDR
cope-1	-0.267425	21.2067	-3.97579	0.000826955	0.0155547	FDR
rnp-6	-0.205042	19.0706	-3.9721	0.000833923	0.0156414	FDR
clu-1	0.390388	21.245	3.96123	0.000854755	0.0159868	FDR
ymel-1	0.313418	19.518	3.95949	0.00085815	0.0160051	FDR
ogdh-1	0.350839	20.383	3.95289	0.000871096	0.0162009	FDR
W08F4.3	0.496437	20.1934	3.94887	0.000879089	0.0163038	FDR
F09C8.2	-0.274197	15.9422	-3.94428	0.000888302	0.0164286	FDR
fmo-5	0.472126	16.7589	3.94044	0.000896095	0.0165266	FDR
sart-1	-0.257895	18.4327	-3.93807	0.00090092	0.0165694	FDR
cpz-1	0.89447	21.8272	3.93785	0.000912745	0.016697	FDR
fbxa-65	1.13702	15.9749	3.93777	0.000912899	0.016697	FDR
Y65B4A.8	0.740971	18.2261	3.93534	0.000916105	0.0167095	FDR
pyc-1	0.37894	21.7645	3.92308	0.000932113	0.0169082	FDR
ergo-1	-0.499042	20.2137	-3.92199	0.000934442	0.0169082	FDR
let-767	0.415665	19.9132	3.92156	0.00093535	0.0169082	FDR
Y22D7AL.10	0.387584	23.9849	3.92068	0.000937215	0.0169082	FDR
Y111B2A.12	-0.474553	17.2306	-3.91562	0.000948048	0.0170571	FDR
ccep-97	0.707123	18.4375	3.91213	0.000965436	0.0173164	FDR
fnta-1	-0.347629	19.0891	-3.90659	0.00096769	0.0173164	FDR
C35B1.5	1.31387	19.7595	3.90818	0.000976138	0.017344	FDR
sax-2	-0.422836	18.3573	-3.90255	0.000976607	0.017344	FDR
hmt-1	0.323328	17.9658	3.90233	0.000977089	0.017344	FDR
ZK1320.9	0.378444	20.4	3.89398	0.000995814	0.0176291	FDR
znf-207	-0.394131	18.2167	-3.89123	0.00100204	0.0176921	FDR
copb-2	-0.302115	21.7081	-3.87958	0.00102891	0.0181181	FDR
prx-19	0.699305	17.469	3.87816	0.00103735	0.0182182	FDR
F53F1.3	0.467479	16.3217	3.86145	0.00107215	0.0187796	FDR
W05H9.1	1.11481	19.5621	3.86427	0.0010781	0.0187845	FDR
hrpa-2	0.633684	17.042	3.86012	0.0010754	0.0187845	FDR
zig-6	1.43376	17.0382	3.85456	0.00110205	0.0191515	FDR
gcs-1	0.326988	19.3028	3.84744	0.00110681	0.0191837	FDR
algn-2	0.372944	18.4518	3.84222	0.00112	0.0193589	FDR
vit-6	0.510792	26.6864	3.84147	0.00112569	0.0193589	FDR
R10H10.7	0.305689	15.9278	3.83999	0.00112568	0.0193589	FDR
ubc-15	-0.475295	18.5191	-3.83632	0.00113511	0.0194704	FDR
uaf-2	-0.249498	19.5238	-3.83413	0.00114076	0.0195167	FDR
C25H3.14	1.4634	17.2341	3.83562	0.00115031	0.0196294	FDR
tpi-1	0.352208	22.9131	3.82513	0.00116432	0.0198174	FDR
kin-4	-0.385033	16.8509	-3.82053	0.00117653	0.0199739	FDR
ttc-1	0.456851	17.2704	3.81728	0.00118524	0.0200629	FDR
C50F4.6	0.635185	17.236	3.81635	0.00118784	0.0200629	FDR
cyn-13	-0.327055	19.1747	-3.8119	0.00119982	0.0201943	FDR
W02H5.8	0.524161	16.5447	3.8112	0.00120171	0.0201943	FDR
dhs-18	0.670786	17.9231	3.79859	0.00124517	0.0208369	FDR
seld-1	0.333016	15.9884	3.79454	0.00124805	0.0208369	FDR
scp-1	0.594438	17.3062	3.79406	0.0012494	0.0208369	FDR
T22D1.3	0.62837	20.7155	3.78616	0.0012838	0.0213121	FDR
hrpr-1	-0.28798	23.1899	-3.78191	0.00128433	0.0213121	FDR
pam-1.1	0.320719	16.0423	3.78041	0.00128869	0.0213311	FDR
acl-1	0.486041	16.1152	3.77775	0.00129651	0.0213499	FDR
pus-1	-0.364705	17.3411	-3.77759	0.00129698	0.0213499	FDR
C25H3.11	0.310531	17.4339	3.77673	0.0012995	0.0213499	FDR
bus-5	-1.4791	17.8388	-3.77546	0.00131803	0.0215473	FDR
C14C10.5	-0.275083	20.2505	-3.77107	0.00131632	0.0215473	FDR
prp-21	-0.297394	20.2823	-3.76882	0.00132304	0.0215614	FDR
znf-622	-0.428017	18.9995	-3.76776	0.00132625	0.0215614	FDR
Y76B12C.3	-0.352099	18.8824	-3.76696	0.00132866	0.0215614	FDR
F32D1.5	-0.295514	22.3186	-3.76548	0.00133311	0.0215808	FDR
hpo-19	0.29497	20.4662	3.75667	0.00136002	0.0219626	FDR
crn-2	0.423325	17.8087	3.75168	0.00137553	0.0221365	FDR
C16C10.8	-0.434986	17.2347	-3.75105	0.00137747	0.0221365	FDR
maoc-1	1.02407	20.1207	3.75378	0.00138425	0.0221916	FDR
rde-11	0.501159	17.026	3.74717	0.00138965	0.0222243	FDR
afmd-2	0.401449	16.3416	3.74279	0.00140355	0.0223925	FDR
ngp-1	-0.598511	18.8028	-3.73897	0.00142114	0.0226187	FDR
cup-2	-0.326833	19.0527	-3.73392	0.00143207	0.0227379	FDR
C27B7.2	0.671788	17.4989	3.73457	0.00143638	0.0227519	FDR
Y34D9A.7	0.234257	17.6131	3.72039	0.00147668	0.0232444	FDR
hex-1	-0.565725	18.1609	-3.71974	0.00147887	0.0232444	FDR
mccc-1	0.260456	21.1132	3.7193	0.00148036	0.0232444	FDR
tlk-1	-0.324448	19.3241	-3.71895	0.00148152	0.0232444	FDR
pars-1	-0.316655	21.6263	-3.71607	0.00149123	0.0233213	FDR
aat-9	0.470909	19.0444	3.71541	0.00149346	0.0233213	FDR
mtk-1	0.282756	17.4796	3.71034	0.00151075	0.0235357	FDR
tbc-1	0.654204	17.8162	3.70453	0.00153923	0.0239231	FDR
Y71H2AM.6	0.54577	17.211	3.69382	0.00156841	0.0242576	FDR
mrps-5	-0.273173	19.7296	-3.69354	0.00156939	0.0242576	FDR
Y54H5A.1	-0.488165	18.3346	-3.69288	0.00157174	0.0242576	FDR
F46F11.1	0.274343	18.6664	3.68956	0.0015836	0.0243837	FDR
mog-5	-0.272089	18.9054	-3.68788	0.00158965	0.0244069	FDR
F01F1.15	0.404627	19.3802	3.6871	0.00159248	0.0244069	FDR
Y53G8AR.6	-0.215368	19.7941	-3.6748	0.00163748	0.0250388	FDR
cuc-1	1.01396	19.3412	3.66544	0.00169016	0.0257611	FDR
pxl-1	0.369955	16.0617	3.66022	0.00169251	0.0257611	FDR
C45B2.6	0.328339	16.3431	3.6589	0.00169757	0.0257789	FDR
B0511.6	-0.413599	18.0238	-3.65603	0.00170866	0.025888	FDR
acl-14	0.285191	19.6156	3.6545	0.0017146	0.0259186	FDR
prmt-5	0.3806	18.7055	3.64727	0.00174291	0.0262379	FDR
irs-2	0.309391	21.4815	3.64708	0.00174365	0.0262379	FDR
gbf-1	-0.200908	18.9599	-3.64461	0.00175342	0.0262638	FDR
adr-1	-0.336456	20.2438	-3.64455	0.00175367	0.0262638	FDR
F22D6.2	-0.573976	18.3334	-3.64472	0.00175727	0.0262638	FDR
T04G9.7	0.60272	18.5107	3.64434	0.00176192	0.026274	FDR
rtfo-1	-0.264627	18.7985	-3.63908	0.00177553	0.0264149	FDR
F17E9.4	0.878381	16.3872	3.64144	0.00178429	0.0264149	FDR
Y47G6A.18	-0.313851	19.103	-3.63808	0.00177956	0.0264149	FDR
T22C1.6	-0.330781	19.9174	-3.63616	0.00178732	0.0264149	FDR
F58H1.3	-0.367912	15.8118	-3.63423	0.00179513	0.0264711	FDR
T16G12.3	0.368156	15.8394	3.63009	0.00181204	0.0266612	FDR
lbp-6	1.84368	19.9528	3.63115	0.00182623	0.0267693	FDR
fars-1	-0.342925	21.395	-3.62635	0.00182748	0.0267693	FDR
ivns-1	-0.368428	19.0353	-3.62059	0.00185145	0.0270606	FDR
pdi-2	-0.566048	23.1348	-3.62268	0.00185797	0.0270961	FDR
math-20	0.656912	15.6942	3.61856	0.00187585	0.0272968	FDR
cfp-1	0.286507	18.0444	3.61291	0.00188392	0.027354	FDR
Y20F4.4	0.456653	15.8195	3.6101	0.00189596	0.0273577	FDR
EEED8.15	-0.320912	16.528	-3.6101	0.00189597	0.0273577	FDR
B0564.2	0.426271	17.8845	3.60996	0.00189657	0.0273577	FDR
gpi-1	0.711474	20.0893	3.60952	0.00191758	0.0276007	FDR
D2045.9	0.477325	18.0694	3.6023	0.00192974	0.0277154	FDR
hpd-1	1.15159	18.1495	3.60479	0.00193816	0.0277761	FDR
Y71F9AR.4	0.287125	16.7502	3.59806	0.00194834	0.0278616	FDR
F54F2.7	0.329019	16.9573	3.59038	0.00198251	0.0282892	FDR
C17G1.2	-0.720858	16.6087	-3.59252	0.0019889	0.0283194	FDR
pigu-1	0.363474	16.7699	3.58701	0.00199768	0.0283834	FDR
hrg-7	1.27065	16.1719	3.59003	0.00200378	0.0284091	FDR
rrf-1	0.294835	17.8724	3.58375	0.00201248	0.0284714	FDR
F38B2.4	1.15444	17.9319	3.58595	0.00202231	0.0285309	FDR
slc-25a26	0.326222	16.9091	3.58094	0.0020253	0.0285309	FDR
C28H8.3	-0.289638	21.9454	-3.57712	0.00204288	0.0287174	FDR
Y48B6A.13	0.459399	16.9317	3.57517	0.0020519	0.0287831	FDR
jph-1	0.554878	16.7108	3.56494	0.00209995	0.0293949	FDR
snrp-200	-0.280953	20.9195	-3.5552	0.0021467	0.029929	FDR
fce-1	0.322532	18.8331	3.5545	0.00215008	0.029929	FDR
qars-1	-0.268144	22.4714	-3.55418	0.00215167	0.029929	FDR
iscu-1	0.30143	18.1715	3.54297	0.0022069	0.0306329	FDR
mtq-2	0.925378	17.476	3.54176	0.00223417	0.0308819	FDR
zipt-7.1	0.654993	16.4497	3.5395	0.002231	0.0308819	FDR
rpoa-12	0.269795	16.0291	3.53376	0.00225332	0.0310818	FDR
cpt-1	0.277865	20.5501	3.52522	0.00229722	0.0316213	FDR
atg-2	-0.288922	17.5032	-3.52412	0.00230292	0.0316341	FDR
acaa-2	0.369754	22.9116	3.52235	0.00231213	0.0316949	FDR
fubl-2	-0.239095	20.4154	-3.51546	0.00234841	0.0320861	FDR
daf-25	-0.237748	18.7436	-3.5148	0.00235194	0.0320861	FDR
ggtb-1	-0.351218	18.4316	-3.51408	0.00235576	0.0320861	FDR
mab-21	-0.690624	17.832	-3.51585	0.0023649	0.0320861	FDR
B0238.11	-0.353283	19.2465	-3.51286	0.00236227	0.0320861	FDR
ttx-7.1	0.371798	21.0006	3.50985	0.00237838	0.032203	FDR
F59A2.5	1.0194	17.9319	3.51193	0.00238942	0.0322865	FDR
COX2-ctc.2	0.818496	21.0107	3.50706	0.00241578	0.0325099	FDR
F31D4.2	-0.320906	16.8137	-3.50346	0.00241293	0.0325099	FDR
Y4C6B.3	0.30781	21.4975	3.50122	0.00242516	0.03257	FDR
mrps-6	-0.249256	18.5056	-3.5002	0.00243078	0.0325794	FDR
aman-1	1.17019	19.1726	3.49745	0.00246861	0.0330195	FDR
ZK550.3	-0.296477	19.4578	-3.49017	0.00248642	0.0331907	FDR
B0432.10	-0.251933	17.0652	-3.48692	0.00250474	0.0332246	FDR
ergi-1	-0.440829	16.8623	-3.48672	0.00250585	0.0332246	FDR
sqv-6	0.333581	17.3656	3.48651	0.00250707	0.0332246	FDR
M106.8	0.667105	17.9653	3.48808	0.00251755	0.0332246	FDR
htz-1	0.53598	22.6961	3.48717	0.00251856	0.0332246	FDR
Y54E10BR.4	-0.356102	21.3983	-3.48314	0.00252619	0.0332246	FDR
C45G9.2	0.855424	16.6278	3.48578	0.0025343	0.0332246	FDR
sqd-1	-0.364655	19.0667	-3.48259	0.00252933	0.0332246	FDR
F32B5.1	1.55883	17.5215	3.48493	0.00253914	0.0332246	FDR
rab-7	0.267829	20.9112	3.48166	0.00253468	0.0332246	FDR
cox-6c	0.833025	19.3306	3.48037	0.00256534	0.0335012	FDR
rnp-1	-0.256078	18.8113	-3.47087	0.00259713	0.0338429	FDR
epg-7	-0.308442	21.9392	-3.47009	0.00260173	0.0338429	FDR
lin-23	-0.331175	17.2208	-3.46808	0.00261353	0.0339298	FDR
cul-2	-0.307731	19.534	-3.46616	0.00262484	0.0339476	FDR
C32F10.8	-0.30241	20.3089	-3.46591	0.00262636	0.0339476	FDR
sup-37	-0.432253	17.5879	-3.46525	0.00263028	0.0339476	FDR
dnpp-1	0.321	19.539	3.46336	0.00264152	0.0340263	FDR
apl-1	-0.377592	17.1616	-3.45814	0.00267278	0.0343206	FDR
ash-2	-0.332101	17.7954	-3.45782	0.00267474	0.0343206	FDR
eif-3.I	-0.283051	21.6731	-3.4533	0.0027021	0.0346046	FDR
hsr-9	-0.247749	20.2452	-3.45167	0.00271206	0.0346651	FDR
hmg-4	-0.262913	19.1237	-3.45004	0.00272207	0.0347261	FDR
sur-5	-0.340595	17.2254	-3.44896	0.00272865	0.0347431	FDR
Y39A3CL.4	0.310052	19.8626	3.44772	0.00273634	0.0347741	FDR
C01A2.4	0.411628	17.4246	3.44471	0.00275494	0.0348989	FDR
cyn-8	-0.300564	18.77	-3.44434	0.00275723	0.0348989	FDR
npp-23	-0.253603	20.0418	-3.44358	0.00276197	0.0348989	FDR
alh-7	0.40278	19.6479	3.44097	0.00277828	0.0350381	FDR
wts-1	-0.28348	16.6797	-3.43816	0.00279592	0.0351935	FDR
F09G2.8	0.319409	18.0085	3.43505	0.00281558	0.0353738	FDR
Y54E10A.10	-0.404502	18.0116	-3.4321	0.00283439	0.0355426	FDR
W07E6.2	-0.299731	18.1641	-3.42893	0.00285471	0.0356817	FDR
egl-27	-0.27511	18.5196	-3.42869	0.00285626	0.0356817	FDR
nstp-4	0.565732	18.4456	3.42851	0.00286704	0.035746	FDR
let-504	-0.236643	16.7673	-3.42593	0.00287407	0.035746	FDR
Y39B6A.34	0.24375	16.4779	3.42493	0.00288055	0.035746	FDR
ndx-3	0.364606	16.9453	3.42455	0.00288301	0.035746	FDR
T10E9.1	-0.330727	16.3732	-3.42177	0.00290109	0.0357958	FDR
nmt-1	-0.288253	21.9839	-3.42176	0.0029012	0.0357958	FDR
R05D3.12	0.380831	17.0593	3.42144	0.00290324	0.0357958	FDR
eral-1	0.460147	16.8682	3.41646	0.00293601	0.0361326	FDR
K01G5.8	0.735776	16.4164	3.41816	0.00294697	0.0362001	FDR
T10B5.3	-0.487725	18.3593	-3.41143	0.00296945	0.0364087	FDR
F10G7.10	-0.197816	17.9582	-3.40945	0.00298275	0.0365042	FDR
Y6B3B.9	0.259039	16.8253	3.40835	0.00299009	0.0365266	FDR
ipgm-1.1	0.802475	16.4616	3.40822	0.00301687	0.0366507	FDR
larp-1	-0.235659	20.4771	-3.40528	0.00301086	0.0366507	FDR
act-3	1.98784	21.3659	3.40675	0.00302688	0.0366507	FDR
F54B8.4	1.10594	15.8614	3.4064	0.00302926	0.0366507	FDR
isy-1	-0.271097	18.0693	-3.40356	0.00302254	0.0366507	FDR
mppb-1	0.351193	18.4377	3.40196	0.00303347	0.0366507	FDR
Y54G11A.11	-0.392822	18.9345	-3.39727	0.00306565	0.036972	FDR
mrt-1	0.523202	17.012	3.38457	0.00315453	0.0379748	FDR
lin-25	-0.287745	16.7938	-3.38354	0.00316183	0.0379937	FDR
obr-1	0.270328	15.9268	3.38189	0.00317358	0.0380658	FDR
mrp-7	0.419202	18.67	3.37927	0.00319231	0.0382211	FDR
F41H10.3	0.313087	16.5335	3.37562	0.00321865	0.038467	FDR
F55F8.2	-0.370845	17.8662	-3.37221	0.00324343	0.0386933	FDR
cup-15	0.331129	18.4843	3.37054	0.00325563	0.038769	FDR
ugt-23	-0.400023	18.7815	-3.36582	0.00329039	0.0391125	FDR
tmem-131	0.2358	18.1799	3.36458	0.00329957	0.0391513	FDR
R166.3	-0.557866	16.3701	-3.36261	0.00331421	0.0392548	FDR
spt-5	-0.279815	19.147	-3.35899	0.00334124	0.0395042	FDR
nog-1	-0.570873	19.043	-3.36083	0.00335009	0.0395383	FDR
Y48G8AL.13	-0.435846	16.6383	-3.3545	0.00337519	0.0397636	FDR
F33G12.3	0.288871	17.8999	3.3526	0.00338956	0.0397956	FDR
sel-5	0.230781	17.673	3.35256	0.00338993	0.0397956	FDR
gad-3	0.910433	21.8603	3.35467	0.00340187	0.0398651	FDR
nlp-77	0.471117	20.0236	3.34966	0.00341205	0.0399137	FDR
B0228.7	0.273255	20.3472	3.34689	0.00343336	0.0400922	FDR
slt-1	0.683735	16.5407	3.34686	0.00345661	0.0402927	FDR
arf-1.2	0.403019	21.3782	3.34118	0.00347766	0.0404667	FDR
clec-266	0.674489	21.1612	3.34204	0.00349946	0.0406448	FDR
F33D4.6	-0.785311	19.8618	-3.34131	0.00350524	0.0406448	FDR
hda-10	0.34204	17.2658	3.33322	0.00354038	0.0409805	FDR
homt-1	0.530424	16.9402	3.32787	0.00358315	0.0414032	FDR
smk-1	-0.262808	18.939	-3.32665	0.00359303	0.041445	FDR
Y55F3AM.9	0.274046	17.7671	3.3248	0.00360797	0.0415002	FDR
pbs-5	-0.340143	22.212	-3.3245	0.00361035	0.0415002	FDR
riok-1	0.284618	18.2809	3.32299	0.00362267	0.0415697	FDR
ldp-1	0.272352	20.3967	3.32076	0.00364082	0.0416374	FDR
test-1	-0.493774	17.3211	-3.32072	0.00364115	0.0416374	FDR
C32D5.8	0.486617	20.8908	3.31892	0.0036628	0.0418127	FDR
fbp-1	0.356572	20.1375	3.31601	0.00367983	0.0419349	FDR
atg-4.1	-0.354437	16.8485	-3.31428	0.00369411	0.0419689	FDR
ZK632.2	0.266469	19.1457	3.31412	0.00369549	0.0419689	FDR
eif-3.H	-0.193029	21.1301	-3.31216	0.00371178	0.0420817	FDR
clp-2	-0.520109	16.618	-3.30741	0.00375154	0.0424597	FDR
ZK1073.1	0.567318	20.905	3.30939	0.00375969	0.0424794	FDR
brf-1	-0.303968	17.6484	-3.30562	0.00376657	0.0424846	FDR
H20J04.9	0.323253	17.5708	3.30228	0.00379495	0.0427319	FDR
trpp-4	0.235619	17.7547	3.2998	0.00381608	0.0428969	FDR
Y41E3.1	-0.410141	18.7082	-3.29242	0.00387975	0.0435387	FDR
lpin-1	0.285582	17.5761	3.28941	0.00390598	0.0437041	FDR
ags-3	-0.428049	17.2573	-3.28922	0.0039077	0.0437041	FDR
gfat-1	-0.416296	20.2848	-3.28842	0.0039147	0.0437086	FDR
ZK1236.1	0.335528	16.2381	3.28627	0.0039336	0.0438458	FDR
ubc-13	-0.38168	18.9045	-3.28426	0.00395129	0.0439099	FDR
lnp-1	0.237648	17.9875	3.28411	0.00395262	0.0439099	FDR
cap-2	-0.362102	18.8781	-3.28026	0.00398694	0.0442169	FDR
F17C8.9	0.562334	16.8131	3.27841	0.00400357	0.0443272	FDR
mfn-1	-0.39921	17.9833	-3.27472	0.00403664	0.0445847	FDR
tsp-12	-0.720297	16.2062	-3.27679	0.00404745	0.0445893	FDR
rnp-2	-0.246411	20.2036	-3.27432	0.0040403	0.0445847	FDR
C02G6.2	0.887295	17.2564	3.27507	0.00406486	0.0447067	FDR
nol-9	0.262373	16.6325	3.26961	0.00408315	0.0448334	FDR
F25H2.12	0.269228	16.4589	3.26505	0.00412508	0.0452188	FDR
ugt-29	0.969097	15.9858	3.26553	0.00415244	0.0454435	FDR
bckd-1a	0.205799	20.2353	3.26066	0.00416575	0.0455139	FDR
mcp-1	0.232614	15.7353	3.25815	0.00418926	0.0456954	FDR
abcf-2	-0.469917	21.6225	-3.25727	0.00420512	0.0457929	FDR
dao-5	-0.374246	19.1805	-3.25142	0.00425279	0.046236	FDR
mrpl-54	-0.302479	17.9156	-3.24917	0.00427429	0.0463936	FDR
ctl-1	0.824375	21.1818	3.25083	0.00429093	0.046498	FDR
F33H2.6	0.444947	19.0333	3.24666	0.00429829	0.0465016	FDR
ula-1	0.291479	19.5707	3.24481	0.00431616	0.0466187	FDR
dhs-22	0.252792	18.8132	3.24208	0.00434255	0.0468274	FDR
lit-1	-0.351725	18.5135	-3.2367	0.00439517	0.0473178	FDR
Y54E5A.5	-0.444619	18.9778	-3.23508	0.00441108	0.047412	FDR
hrde-2	0.730884	20.955	3.23627	0.00443255	0.0474745	FDR
Y56A3A.28	-0.537014	18.068	-3.23433	0.00442794	0.0474745	FDR
egl-45	-0.199296	22.5574	-3.23192	0.00444233	0.0474745	FDR
copb-1	-0.200972	21.202	-3.2316	0.00444558	0.0474745	FDR
usp-5	-0.201669	21.0318	-3.23054	0.00445612	0.0475104	FDR
ubh-4	-0.229561	21.4489	-3.22931	0.00446832	0.0475639	FDR
T10B11.6	0.224066	17.5076	3.22777	0.00448371	0.0476354	FDR
let-716	-0.435672	18.4837	-3.2272	0.00448942	0.0476354	FDR
Y50D4C.3	0.220321	18.0204	3.22292	0.00453264	0.0479506	FDR
C44B7.11	0.370487	16.4161	3.22229	0.00453901	0.0479506	FDR
sdz-4	-0.480146	16.4747	-3.22211	0.00454086	0.0479506	FDR
B0495.8	-0.234632	19.0843	-3.21584	0.00460481	0.0485485	FDR
micu-1	-0.36207	17.6575	-3.21407	0.00462313	0.0486641	FDR
letm-1	0.383908	17.4263	3.21137	0.0046511	0.0488808	FDR
Y41E3.7	-0.259802	18.7709	-3.21005	0.00466482	0.0489473	FDR
lbp-3	0.459261	19.2211	3.20891	0.0046767	0.0489943	FDR
flad-1	0.296268	17.4209	3.20653	0.00470156	0.0491769	FDR
tag-307	0.254331	16.9792	3.20398	0.00472838	0.0493795	FDR
T25G3.3	-0.445137	18.1712	-3.20027	0.00476769	0.0496363	FDR
prp-8	-0.226109	20.8156	-3.20012	0.00476933	0.0496363	FDR
oatr-1	0.417878	21.1329	3.199	0.00478131	0.0496363	FDR
lpd-3	0.208088	16.5805	3.19884	0.00478296	0.0496363	FDR
Y105E8A.11	0.429025	17.8523	3.19802	0.00479177	0.0496499	FDR
his-1	0.288945	26.9542	3.19405	0.00483438	0.0500132	NS
ech-8	0.859504	16.9955	3.19403	0.00486974	0.05017	NS
tsr-1	-0.287196	18.6756	-3.19075	0.00487009	0.05017	NS
F56F11.4	-0.239045	20.5557	-3.19055	0.00487227	0.05017	NS
lap-2	0.232987	21.9157	3.18873	0.00489208	0.0502957	NS
Y43B11AR.3	0.253838	16.5723	3.18191	0.00496707	0.0509876	NS
top-2	-0.255388	22.4372	-3.17735	0.00501779	0.0514284	NS
tre-2	0.292934	16.1893	3.17554	0.00503813	0.0514535	NS
Y94H6A.7	0.462266	17.2526	3.17524	0.00504143	0.0514535	NS
vms-1	0.23959	18.0417	3.17505	0.00504355	0.0514535	NS
F25G6.8	-0.383039	18.1927	-3.17264	0.00507076	0.0516516	NS
acs-7	0.871019	17.309	3.17317	0.00510088	0.0518356	NS
ZK632.9	0.406147	20.5403	3.16966	0.00510449	0.0518356	NS
R08F11.1	0.455807	16.3371	3.16745	0.00512968	0.0520116	NS
C01G5.5	0.453379	18.507	3.16421	0.00516691	0.052237	NS
F21D5.1	-0.381564	21.6361	-3.16414	0.00516768	0.052237	NS
Y56A3A.22	0.813182	16.9191	3.16523	0.00519173	0.0523203	NS
arl-5	0.295653	17.441	3.16308	0.00517986	0.0522803	NS
C56G2.3	-0.209617	16.8111	-3.15868	0.0052309	0.0526349	NS
mrps-17	-0.25544	20.4303	-3.15611	0.00526095	0.0528104	NS
F10D11.2	0.479049	16.4434	3.15582	0.00526429	0.0528104	NS
rop-1	-0.300428	19.719	-3.15328	0.00529419	0.052889	NS
pinn-4	0.618478	18.6107	3.15494	0.00530829	0.052889	NS
hpo-11	-0.20498	17.9432	-3.1528	0.00529983	0.052889	NS
gly-20	-0.328058	16.7084	-3.15223	0.00530662	0.052889	NS
bcs-1	0.237535	16.9888	3.15177	0.00531206	0.052889	NS
F44G4.3	0.259262	16.4706	3.14982	0.00533514	0.0530389	NS
mtcu-1	0.280316	15.8111	3.14744	0.00536342	0.0532402	NS
wht-2	0.234888	17.8964	3.14542	0.00538757	0.0533998	NS
miga-1	-0.325024	18.5844	-3.14421	0.00540218	0.0534646	NS
pmk-3	0.17598	15.7504	3.14057	0.00544604	0.0537744	NS
C16A3.6	-0.480703	16.7327	-3.14027	0.00544972	0.0537744	NS
arrd-2	0.366061	15.6839	3.13613	0.00550007	0.0541172	NS
bet-2	-0.29959	18.7556	-3.13575	0.0055048	0.0541172	NS
T20B3.1	0.605079	17.9043	3.13702	0.0055212	0.0541172	NS
unc-76	-0.22257	16.6087	-3.13482	0.00551617	0.0541172	NS
eftu-2	-0.27323	21.5468	-3.1334	0.0055336	0.0541172	NS
hum-1	0.228213	17.8704	3.13248	0.00554495	0.0541172	NS
rpn-5	-0.247618	22.1751	-3.13239	0.00554609	0.0541172	NS
C49C3.6	0.406599	16.2659	3.13208	0.00554985	0.0541172	NS
metl-6	0.252063	18.3352	3.12724	0.00560996	0.0546229	NS
paf-2	0.720227	16.4625	3.12914	0.00562469	0.0546859	NS
hmg-1.1	0.550022	22.7365	3.12391	0.00568672	0.0551415	NS
F15B9.10	0.576489	16.4715	3.12188	0.00568821	0.0551415	NS
hlh-1	-0.262693	17.187	-3.11785	0.00572816	0.0554475	NS
scpl-4	0.268615	19.1089	3.11429	0.00577368	0.0558067	NS
spcs-3	0.189742	19.4237	3.1121	0.00580184	0.0559598	NS
cyn-16	0.294751	17.9003	3.11174	0.00580643	0.0559598	NS
E02H9.3	0.351176	17.4088	3.11093	0.00581689	0.0559791	NS
dex-1.1	-0.63939	17.2558	-3.11066	0.00585344	0.0561676	NS
ddx-46	-0.215798	18.7728	-3.10856	0.00584759	0.0561676	NS
rsp-5	0.492652	16.7621	3.10616	0.00587887	0.05633	NS
W09C5.1	-0.505638	18.3858	-3.10543	0.00589961	0.056447	NS
Y40C5A.4	0.352913	16.6174	3.10369	0.00591124	0.0564766	NS
apa-2	-0.230639	19.8672	-3.10118	0.0059442	0.0567098	NS
K04F10.7	-0.275807	19.4076	-3.09962	0.00596475	0.0568239	NS
ttr-24	0.632784	19.8426	3.09788	0.00602794	0.057323	NS
yju-2	-0.306433	17.6533	-3.09439	0.00603446	0.057323	NS
smu-1	-0.226115	19.5331	-3.0929	0.00605443	0.0574304	NS
F22B8.7	0.305759	18.1653	3.09217	0.00606424	0.0574411	NS
fbxc-52	-0.25419	18.26	-3.09113	0.00607823	0.0574913	NS
W03F9.4	1.7129	16.9933	3.09125	0.00611705	0.0576937	NS
pnk-1	0.293162	17.763	3.0883	0.00611649	0.0576937	NS
eif-3.D	-0.181132	20.6267	-3.08583	0.00615006	0.0578949	NS
pfk-1.1	0.225691	20.5944	3.08541	0.00615587	0.0578949	NS
cct-4	-0.288658	20.3748	-3.08416	0.00617296	0.0579733	NS
btb-7	0.429005	16.189	3.08303	0.00618835	0.0580355	NS
F45F2.9	-0.614291	17.3138	-3.07903	0.00627761	0.0586365	NS
inx-8	0.575259	18.3842	3.07862	0.00628364	0.0586365	NS
rab-39	0.299589	17.4657	3.07697	0.00627206	0.0586365	NS
F53F4.11	-0.405276	19.0586	-3.07584	0.00628786	0.0586365	NS
ing-3	-0.22534	16.9274	-3.07432	0.006309	0.0587509	NS
gars-1	-0.263597	22.391	-3.0702	0.00636691	0.0592069	NS
K09G1.1	0.661135	16.7931	3.06496	0.00647631	0.0600555	NS
prdx-6	0.429443	19.8929	3.06299	0.00646942	0.0600555	NS
myrf-1	0.369649	16.6004	3.05659	0.00656167	0.060762	NS
cls-1	-0.220528	15.6788	-3.05332	0.00660931	0.0611176	NS
ost-1	-0.741563	18.819	-3.05414	0.0066398	0.0612108	NS
ZK669.2	-0.330121	15.7392	-3.0518	0.00663157	0.0612108	NS
Y37D8A.19	0.823338	16.7547	3.05364	0.00664711	0.0612108	NS
Y94H6A.5	-0.296345	16.914	-3.04825	0.00668383	0.0614214	NS
fkb-1	-0.291727	20.8847	-3.04793	0.00668854	0.0614214	NS
serp-1.1	-0.460523	17.0648	-3.04508	0.00673088	0.0617246	NS
ucp-4	0.354859	17.4122	3.04315	0.00675976	0.0619037	NS
uaf-1	-0.195368	20.8291	-3.04215	0.0067747	0.0619549	NS
T08G11.1	0.253308	20.3315	3.04147	0.00678489	0.0619624	NS
arp-6	0.219701	16.2456	3.04081	0.00679483	0.0619677	NS
C55A6.4	1.13109	16.7189	3.04252	0.00681217	0.0619855	NS
coa-4	0.347361	16.3287	3.03943	0.0068155	0.0619855	NS
hsp-75	0.218768	20.224	3.03526	0.00687868	0.0624461	NS
hrpk-1	-0.271958	21.1343	-3.03484	0.00688501	0.0624461	NS
F52E1.14	-0.298675	15.4404	-3.03412	0.00689598	0.0624542	NS
pdr-1	0.206315	16.2899	3.03354	0.00690477	0.0624542	NS
cup-14	0.239018	16.7378	3.02571	0.00702538	0.0634584	NS
tag-53	-0.348097	17.5343	-3.0249	0.00703798	0.0634856	NS
F25H2.6	-0.226645	17.4576	-3.02288	0.00706932	0.0635882	NS
gcc-2	0.204038	17.5689	3.02263	0.00707325	0.0635882	NS
rbpl-1	-0.219983	17.8439	-3.02211	0.00708133	0.0635882	NS
paqr-1	0.35754	16.9435	3.0217	0.00708776	0.0635882	NS
C23G10.2	0.414983	19.853	3.02015	0.00711207	0.0637199	NS
hse-5	-0.349048	17.3366	-3.01895	0.00713101	0.0638033	NS
prmt-6	-0.504134	15.9164	-3.01888	0.00714736	0.0638633	NS
acs-4	0.192015	22.5303	3.01581	0.00718061	0.0640739	NS
Y49E10.21	0.204677	18.0883	3.01318	0.00722244	0.0643604	NS
vps-32.1	-0.202631	18.4151	-3.01149	0.00724933	0.0645088	NS
F53H2.3	-0.447845	16.9932	-3.01092	0.00725858	0.0645088	NS
chtl-1	-0.450538	17.2062	-3.0068	0.0073247	0.0650092	NS
par-5	0.209378	24.5133	3.00613	0.00733566	0.0650193	NS
Y116A8C.10	0.395362	15.7317	3.00492	0.0073552	0.0651053	NS
R08D7.4	-0.300844	16.5426	-2.99957	0.00744251	0.0657902	NS
bre-1	-0.57213	18.225	-2.99746	0.00751556	0.0662264	NS
Y75B8A.7	-0.293173	17.4642	-2.99561	0.00750776	0.0662264	NS
cyp-35a4	-0.421209	16.5181	-2.99393	0.00753558	0.0662264	NS
mvk-1	0.208114	18.966	2.99361	0.00754096	0.0662264	NS
F58B3.6	0.238777	17.8977	2.99355	0.00754187	0.0662264	NS
clr-1	-0.217446	17.4733	-2.99202	0.00756747	0.0663632	NS
Y71G10AR.4	0.836561	19.5346	2.99251	0.00760509	0.0665169	NS
Y49F6B.2	-0.273071	17.3008	-2.99066	0.00759015	0.066474	NS
K03H1.13	0.574122	16.021	2.991	0.00762302	0.0665857	NS
aakg-1	0.283465	16.8924	2.98428	0.00769761	0.0670624	NS
pdcd-2	-0.305689	18.2011	-2.98426	0.00769784	0.0670624	NS
prx-1	0.578617	16.8442	2.98003	0.0077977	0.0677613	NS
C38H2.2	-0.473382	16.3877	-2.97816	0.00780199	0.0677613	NS
thoc-5	-0.189315	18.961	-2.97777	0.00780877	0.0677613	NS
asns-2	1.50964	19.3853	2.97887	0.00783645	0.0678237	NS
vgln-1	-0.267548	22.9992	-2.97659	0.00782901	0.0678237	NS
sfxn-2	0.321156	16.2181	2.97411	0.00787193	0.0680419	NS
cest-2.1	0.532105	16.3693	2.97396	0.0078855	0.0680446	NS
F56C9.10	-0.357474	19.1522	-2.9729	0.00789281	0.0680446	NS
hrpl-1	-0.25599	17.9791	-2.97032	0.00793776	0.0683432	NS
zer-1	-0.420537	16.6588	-2.96756	0.0079861	0.0685849	NS
rpt-3	-0.226146	22.4874	-2.96754	0.00798656	0.0685849	NS
F08F8.7	0.692279	18.5373	2.96793	0.00802702	0.068754	NS
rme-4	-0.327944	17.5068	-2.9662	0.00801006	0.0686977	NS
bgal-1	0.303199	17.8369	2.95982	0.00812331	0.0694889	NS
C50F4.16	0.319468	17.9584	2.95888	0.0081401	0.0695427	NS
R02D5.8	0.270541	16.3708	2.95457	0.00821748	0.0701133	NS
hrpu-1	-0.236944	17.5896	-2.95008	0.00829891	0.0706689	NS
ZK512.2	-0.329306	18.0416	-2.94981	0.00830394	0.0706689	NS
rict-1	0.287272	17.0304	2.94903	0.00831812	0.0706987	NS
rbx-1	-0.379079	19.6967	-2.94776	0.00834147	0.0708062	NS
C44E4.5	0.295501	18.9147	2.94532	0.00838631	0.0710516	NS
cogc-5	0.24743	17.9702	2.94502	0.00839183	0.0710516	NS
cth-1	0.570895	18.2111	2.94582	0.00841926	0.0711927	NS
hil-4	-0.337483	18.698	-2.94166	0.008454	0.0713953	NS
glh-4	-0.838635	16.9044	-2.94197	0.00849706	0.0715763	NS
hda-2	0.188487	17.4985	2.94024	0.00848029	0.0715261	NS
NA	-0.532901	16.3325	-2.93839	0.00852887	0.0717531	NS
cht-4	0.467878	16.7084	2.93221	0.00863112	0.0725211	NS
rpt-5	-0.251072	23.3779	-2.92917	0.00868891	0.0729142	NS
eif-3.L	-0.177183	20.9803	-2.92661	0.0087378	0.0732316	NS
acl-12	0.290243	15.8684	2.92353	0.00879691	0.0736338	NS
E01A2.2	-0.191467	19.2782	-2.92167	0.00883295	0.0738421	NS
mrrf-1	0.291477	17.9879	2.91987	0.00886787	0.0740288	NS
asd-2	-0.523095	17.5761	-2.91954	0.0088968	0.0740288	NS
pbs-3	-0.315999	18.3268	-2.91773	0.0089096	0.0740288	NS
ncbp-1	-0.261025	20.7049	-2.91747	0.0089146	0.0740288	NS
rnp-7	-0.23069	19.7669	-2.91729	0.00891823	0.0740288	NS
sem-5	-0.303526	17.3345	-2.91705	0.00892275	0.0740288	NS
rrf-3	0.284569	16.7825	2.9165	0.00893354	0.0740288	NS
snrp-40.1	-0.37939	18.8157	-2.91244	0.00901351	0.0745981	NS
ttr-44	1.08567	17.896	2.91245	0.00906406	0.0749228	NS
mtg-1	0.373519	16.8165	2.90521	0.00915733	0.0755994	NS
sqv-4	-0.319643	22.2576	-2.90403	0.0091809	0.0756995	NS
Y11D7A.10	0.726309	16.7016	2.90362	0.00924046	0.0759347	NS
ptp-2	-0.289677	18.2534	-2.90177	0.00922645	0.0759347	NS
mua-3	-0.452395	16.7043	-2.90091	0.00924383	0.0759347	NS
trm-1	-0.211879	19.7045	-2.89692	0.00932505	0.0764123	NS
usp-46	-0.238454	17.6823	-2.89692	0.00932505	0.0764123	NS
Y53G8AR.5	0.481346	15.9635	2.89404	0.00939623	0.0768247	NS
mfsd-11	-0.436137	16.3129	-2.89332	0.00939858	0.0768247	NS
hxk-3	0.436711	19.1956	2.89315	0.00941451	0.07686	NS
trap-2	-0.374329	21.0577	-2.89109	0.00944466	0.0770112	NS
zipt-15	0.624403	17.196	2.89186	0.00947389	0.0771545	NS
M04C9.3	0.427075	16.6355	2.88831	0.00950226	0.0772905	NS
nath-10	-0.407887	17.8366	-2.88449	0.0095819	0.0778426	NS
H41C03.1	-0.418502	17.0894	-2.87733	0.00973298	0.0789731	NS
slcr-46.1	0.214309	15.4909	2.87658	0.009749	0.0790063	NS
C29H12.2	0.286664	20.6297	2.87497	0.00978328	0.0791872	NS
Y18D10A.3	0.47564	16.7303	2.87306	0.00982429	0.079422	NS
VF13D12L.3	0.548285	18.637	2.87428	0.00984421	0.079486	NS
hel-1	-0.247461	23.1796	-2.8696	0.00989866	0.0797812	NS
eif-3.K	-0.230404	21.667	-2.86932	0.00990487	0.0797812	NS
K07C5.3	0.266385	17.4115	2.86675	0.0099604	0.080131	NS
puf-12	-0.383002	17.908	-2.86616	0.00997333	0.0801377	NS
sft-1	0.222982	16.9017	2.86542	0.00998942	0.0801696	NS
F25B4.4	0.460284	18.3695	2.86534	0.0100039	0.0801883	NS
plc-4	0.237117	16.718	2.86241	0.0100552	0.0805027	NS
cri-3	0.46032	20.74	2.8624	0.0100887	0.0806731	NS
sqt-3	-0.798262	18.2705	-2.86138	0.0101319	0.0809211	NS
lbp-4	0.411928	20.2492	2.85774	0.0101631	0.0809958	NS
cct-3	-0.284481	22.4391	-2.8574	0.0101658	0.0809958	NS
C02D5.2	-0.461253	16.7621	-2.85682	0.0101785	0.0810001	NS
ntl-3	-0.283898	18.7933	-2.85599	0.0101971	0.0810506	NS
Y66D12A.8	-0.273647	17.6883	-2.85383	0.0102452	0.0813355	NS
rps-18	-0.14689	22.9425	-2.85313	0.0102609	0.081344	NS
ubxn-1	-0.304364	20.6318	-2.85245	0.0102762	0.081344	NS
acl-2	0.278392	17.2424	2.85213	0.0102832	0.081344	NS
F52A8.1	-0.647071	21.1456	-2.85328	0.0103121	0.0814434	NS
sup-46	-0.226276	21.5944	-2.85048	0.0103204	0.0814434	NS
cysl-2	0.400379	19.5607	2.84993	0.0103326	0.0814434	NS
C26E6.12	0.37767	16.0934	2.8447	0.0104511	0.0822792	NS
acs-11	0.426171	18.4228	2.84288	0.0104926	0.082508	NS
unc-26	0.197159	17.8974	2.84199	0.010513	0.0825263	NS
mce-1	0.576566	18.6689	2.84343	0.0105353	0.0825263	NS
tomm-40	0.342426	21.5316	2.84165	0.0105209	0.0825263	NS
alg-2	-0.223406	19.9743	-2.8406	0.0105448	0.0825263	NS
miz-1	-0.479423	16.9058	-2.84003	0.010558	0.0825318	NS
mrp-4	0.435161	19.2691	2.83969	0.0105789	0.082598	NS
vit-5	0.813015	25.766	2.84032	0.0106068	0.0827179	NS
Y48G8AL.7	0.290747	16.2052	2.83657	0.0106378	0.0828624	NS
rpl-33	-0.153857	23.1048	-2.83445	0.0106869	0.0831471	NS
algn-14	0.210353	16.6286	2.8333	0.0107139	0.0832588	NS
W02D3.12	0.348823	17.8586	2.83019	0.0107866	0.0837256	NS
Y49A3A.3	0.239026	16.586	2.82745	0.010851	0.084127	NS
hlb-1	-0.359975	17.3615	-2.82486	0.0109123	0.0844533	NS
algn-1	0.261013	17.5058	2.82441	0.0109229	0.0844533	NS
K09A9.6	0.548971	16.036	2.82552	0.0109441	0.0844533	NS
eif-1	-0.266464	20.0547	-2.82391	0.0109349	0.0844533	NS
sur-6	-0.310544	20.3238	-2.82181	0.0109849	0.0846694	NS
lido-13	-0.24266	16.483	-2.82107	0.0110026	0.0847074	NS
F10A3.17	0.642594	22.7252	2.82213	0.0110339	0.0847509	NS
clh-6	0.277618	17.1663	2.81995	0.0110296	0.0847509	NS
art-1	0.196131	20.9615	2.81858	0.0110623	0.084871	NS
C03H12.1	-0.247445	16.1578	-2.81703	0.0110998	0.08506	NS
fars-3	-0.28796	21.4397	-2.81239	0.0112122	0.0858222	NS
vpat-1	0.33806	16.4261	2.81128	0.0112392	0.0859293	NS
nhr-71	-0.493689	16.135	-2.80895	0.0113172	0.0864255	NS
dhhc-10	-0.24728	16.7856	-2.8067	0.0113517	0.0865896	NS
ccf-1	-0.294693	17.7455	-2.80532	0.0113857	0.0867492	NS
lpd-8	0.347347	19.0946	2.8042	0.0114135	0.0868606	NS
rbm-34	-0.282145	18.0511	-2.80228	0.0114612	0.0871235	NS
ZK1058.3	0.476982	16.0727	2.80115	0.0115028	0.0872395	NS
npp-25	0.238927	20.4403	2.80082	0.0114974	0.0872395	NS
unc-45	-0.328548	19.6268	-2.79966	0.0115264	0.0873187	NS
prx-6	0.385813	18.1101	2.79827	0.0115613	0.0874831	NS
mtm-10	0.234149	16.3165	2.7967	0.0116008	0.0876811	NS
sucl-2	-0.218101	22.4474	-2.79473	0.0116505	0.0878939	NS
F53G2.12	0.261394	18.7916	2.79453	0.0116555	0.0878939	NS
ctc-1	0.813183	17.0835	2.79415	0.0117235	0.0883061	NS
nex-1	0.542305	21.8731	2.79323	0.011747	0.0883826	NS
F36D3.1	-0.340877	17.7516	-2.78814	0.0118182	0.0888175	NS
tbcc-1	0.31217	16.8503	2.78752	0.0118339	0.0888349	NS
rga-8	-0.280425	16.8207	-2.78647	0.0118609	0.0889366	NS
F59D12.5	0.354542	16.2656	2.78466	0.0119076	0.089186	NS
maph-1.3	0.374489	19.6454	2.7798	0.0120336	0.0900275	NS
rab-5	0.343931	19.2149	2.77908	0.0120523	0.0900659	NS
cox-14	-0.301709	17.839	-2.77776	0.012087	0.0902233	NS
gyf-1.1	-0.231984	20.6864	-2.77681	0.0121117	0.0903062	NS
F08G2.4	0.232161	15.6837	2.77462	0.0121694	0.0906342	NS
C32E8.9	0.390262	17.9917	2.77293	0.0122139	0.0908634	NS
hrpf-1	-0.185044	20.2318	-2.77169	0.0122469	0.0909586	NS
tfbm-1	0.284211	17.1959	2.77141	0.0122542	0.0909586	NS
rbd-1	-0.252315	17.8922	-2.77067	0.0122738	0.0910023	NS
ZK688.5	0.259086	18.8499	2.76908	0.0123162	0.0912142	NS
R05D11.9	-0.202284	18.5028	-2.76818	0.0123401	0.0912893	NS
T26A5.6	0.281394	17.6989	2.76672	0.0123793	0.0914738	NS
mfap-1	-0.189758	18.1555	-2.76608	0.0123963	0.0914738	NS
strl-1	0.374155	17.0634	2.7657	0.0124065	0.0914738	NS
T24A6.20	0.302322	17.4854	2.76466	0.0124346	0.0914901	NS
sgt-1	0.437549	21.9468	2.7653	0.0124644	0.0914901	NS
gly-7	-0.293959	18.5013	-2.76381	0.0124574	0.0914901	NS
pmp-2	0.673483	17.729	2.76479	0.0124916	0.0914901	NS
sgo-1	0.381301	17.0561	2.76315	0.0124753	0.0914901	NS
phb-1	0.306654	22.9996	2.76257	0.0124909	0.0914901	NS
H42K12.3	-0.815381	19.3245	-2.76058	0.0126054	0.0922212	NS
bath-40	-0.401427	17.0855	-2.75705	0.0126407	0.0923779	NS
aps-1	-0.358527	17.3258	-2.75344	0.0127399	0.0929565	NS
cst-1	-0.328885	18.8168	-2.75314	0.012748	0.0929565	NS
B0303.3	0.248134	23.0265	2.7516	0.0127906	0.0931646	NS
tag-229	0.334324	16.3608	2.74996	0.0128359	0.0933918	NS
C26B9.3	-0.827945	18.9253	-2.75087	0.0128722	0.0934696	NS
ccr-4	-0.216656	20.0844	-2.74856	0.0128748	0.0934696	NS
sur-7	-0.296669	16.4727	-2.7455	0.0129602	0.0939864	NS
dhrs-4	1.11074	17.6731	2.74475	0.0130432	0.0943688	NS
prp-39	-0.173557	18.4053	-2.74312	0.013027	0.0943675	NS
sup-26	-0.338549	17.8023	-2.7421	0.0130557	0.0943688	NS
apc-11	-0.843625	17.0108	-2.74008	0.0131748	0.0950548	NS
vti-1	0.245388	16.9284	2.73759	0.0131834	0.0950548	NS
top-3	0.210469	17.499	2.73723	0.0131937	0.0950548	NS
cpt-6	0.191172	18.2758	2.73479	0.0132633	0.0953646	NS
F10G8.9	0.336767	18.0557	2.73469	0.0132662	0.0953646	NS
pyp-1	-0.198376	21.6484	-2.73412	0.0132825	0.0953646	NS
C05G5.2	-0.169734	16.4136	-2.7337	0.0132943	0.0953646	NS
C24A3.4	0.459401	16.3563	2.73136	0.0133626	0.0957506	NS
gly-5.1	-1.24313	16.3496	-2.73062	0.0134459	0.0962439	NS
T28F4.5	1.23676	17.0615	2.72873	0.0135008	0.0965085	NS
R57.2	-0.622261	16.6247	-2.72814	0.0135121	0.0965085	NS
B0495.9	0.45571	19.0494	2.72519	0.0135848	0.0969233	NS
alx-1	0.327145	20.308	2.72255	0.0136177	0.0969546	NS
cbp-1.1	-0.242561	19.0301	-2.72253	0.0136185	0.0969546	NS
B0507.2	0.504859	17.8646	2.71979	0.0137507	0.0976862	NS
cdk-8	-0.224025	17.2245	-2.71865	0.0137327	0.0976632	NS
B0250.5	0.275507	20.7632	2.71745	0.0137683	0.0977061	NS
mafr-1	0.261075	16.2334	2.71614	0.013807	0.0978291	NS
cdr-4	0.820539	18.37	2.7169	0.0138483	0.0978545	NS
nhx-5	0.409318	17.0267	2.71547	0.0138271	0.0978291	NS
snx-1	-0.260074	19.2894	-2.71537	0.0138299	0.0978291	NS
sdz-30	-0.586652	17.4101	-2.71527	0.0138911	0.0979475	NS
lido-7	-0.237878	16.4478	-2.71366	0.0138811	0.0979475	NS
alh-4	0.338082	19.3555	2.71239	0.0139189	0.0980395	NS
B0272.4	1.07593	17.3817	2.71033	0.0140451	0.0987179	NS
ego-2	0.229366	19.2388	2.70838	0.0140396	0.0987179	NS
cyp-31a2	0.495316	19.9231	2.70877	0.0140837	0.0987802	NS
tbc-9	-0.196752	16.8705	-2.70761	0.0140629	0.0987386	NS
rep-1	0.224615	17.1229	2.70248	0.0142189	0.0996223	NS
ooc-5	-0.199578	18.6536	-2.70162	0.0142452	0.099701	NS
vbh-1	-0.343729	20.8453	-2.69817	0.0143514	0.100339	NS
mrpl-14	-0.149987	16.062	-2.69599	0.0144185	0.100702	NS
R107.2	0.516781	17.5413	2.69542	0.0144897	0.101092	NS
bcat-1	0.712087	16.9154	2.69419	0.0145401	0.101337	NS
grl-21	1.67169	17.5064	2.69261	0.0145892	0.101483	NS
nono-1	-0.339576	20.7518	-2.6896	0.014618	0.101483	NS
F36A2.2	-0.252656	16.4391	-2.68914	0.0146323	0.101483	NS
rpn-1	-0.247367	21.9641	-2.68886	0.014641	0.101483	NS
mrps-15	-0.219367	18.1906	-2.68832	0.0146583	0.101483	NS
B0334.5	-0.17025	15.9708	-2.68804	0.014667	0.101483	NS
nol-6	-0.247239	17.9247	-2.68799	0.0146684	0.101483	NS
sir-2.1	-0.200759	18.2527	-2.68576	0.0147388	0.101864	NS
F28H1.4	0.907781	16.4667	2.68504	0.0148278	0.102372	NS
ubl-1	-0.330968	21.5938	-2.68099	0.0148906	0.102699	NS
daf-22	0.833279	19.8136	2.68161	0.0149372	0.102737	NS
mog-4	-0.2145	18.7878	-2.67922	0.0149473	0.102737	NS
ugt-53	0.240404	16.1031	2.67918	0.0149484	0.102737	NS
T04B8.5	-0.273941	17.5494	-2.67887	0.0149583	0.102737	NS
F37A4.2	-0.241096	16.8275	-2.67805	0.0149847	0.102793	NS
wah-1	0.220894	20.114	2.67765	0.0149975	0.102793	NS
F09E5.7	0.277738	18.2543	2.67439	0.0151028	0.103408	NS
dab-1	0.249823	19.3406	2.67375	0.0151234	0.103442	NS
mrpl-41	-0.203725	19.5984	-2.67323	0.0151403	0.103451	NS
ekl-5	-0.379707	17.3632	-2.67157	0.0151944	0.103612	NS
gtf-2e1	-0.301142	18.4356	-2.67139	0.0152001	0.103612	NS
Y61A9LA.10	-0.279929	18.6823	-2.67107	0.0152108	0.103612	NS
cest-2.3	0.312161	15.8039	2.66957	0.0152596	0.103838	NS
tlf-1	-0.232412	16.1499	-2.6662	0.0153702	0.104483	NS
C05C8.7	-0.529942	17.6063	-2.66604	0.0154321	0.104796	NS
dnj-27	-0.336354	18.9504	-2.66279	0.015483	0.105034	NS
acs-21	1.06445	17.1853	2.66165	0.0155885	0.105641	NS
ceeh-1	0.458243	15.9541	2.65938	0.0156266	0.105652	NS
mrps-26	-0.180882	18.9548	-2.65816	0.015637	0.105652	NS
syf-3	-0.193586	19.6595	-2.65813	0.015638	0.105652	NS
sec-11	0.234558	20.8241	2.65687	0.0156801	0.105829	NS
F45H10.2	0.261384	21.7069	2.65576	0.0157176	0.105876	NS
B0281.5	-0.408726	16.7564	-2.65571	0.0157191	0.105876	NS
lpd-6	-0.241485	17.6147	-2.65474	0.0157519	0.105979	NS
T28D6.6	-0.248102	20.2383	-2.65431	0.0157664	0.105979	NS
alh-5	0.405384	17.2928	2.65248	0.0158282	0.106193	NS
aha-1	-0.227705	16.6213	-2.65242	0.0158303	0.106193	NS
npp-21	0.177212	21.0211	2.65028	0.0159028	0.106572	NS
acl-5	0.260457	17.5577	2.64819	0.0159742	0.106941	NS
rab-6.2	-0.26513	18.7391	-2.64688	0.0160189	0.107133	NS
npp-18	-0.320096	20.2409	-2.64617	0.0160432	0.107187	NS
pgp-6	0.609585	16.4134	2.63925	0.0163516	0.108918	NS
Y41E3.8	-0.297841	16.8047	-2.63788	0.0163298	0.108918	NS
C27F2.10	-0.215074	18.9332	-2.63771	0.0163357	0.108918	NS
mboa-2	0.283673	16.9911	2.6332	0.0164938	0.109754	NS
aph-2	0.231957	18.1855	2.63018	0.0166006	0.110354	NS
ttr-53	0.465826	17.0987	2.62983	0.0166293	0.110434	NS
mppa-1	0.262181	19.8196	2.6284	0.0166635	0.110479	NS
ZK1127.5	-0.271456	17.5111	-2.62824	0.0166695	0.110479	NS
rpl-13	-0.163831	25.0706	-2.62756	0.0166937	0.110529	NS
ras-2	-0.418255	16.8819	-2.62693	0.0167162	0.110567	NS
jhdm-1	-0.163231	18.0167	-2.61958	0.0169801	0.112201	NS
cnk-1	-0.198985	16.8739	-2.61894	0.0170034	0.112243	NS
math-33	-0.492176	16.661	-2.61896	0.017027	0.112287	NS
T18D3.1	-0.257743	19.2544	-2.61539	0.0171323	0.112657	NS
ubc-6	-0.31612	18.5455	-2.61534	0.0171341	0.112657	NS
sec-24.1	-0.170136	20.0099	-2.61534	0.0171342	0.112657	NS
C56A3.6	-0.313794	16.6835	-2.61449	0.0171654	0.11275	NS
metl-1	-0.312417	18.3662	-2.6135	0.0172015	0.112847	NS
K10C3.4	0.403997	18.0968	2.61318	0.0172142	0.112847	NS
cdc-48.3	0.231213	20.766	2.61253	0.0172371	0.112885	NS
rbm-25	-0.196796	19.1214	-2.61175	0.0172655	0.112949	NS
T05G5.5	0.371747	18.6974	2.61123	0.0172848	0.112949	NS
C25H3.7	0.294985	18.6118	2.61071	0.0173038	0.112949	NS
ZC123.1	-0.436961	15.9727	-2.61096	0.017315	0.112949	NS
Y76A2B.5	0.273085	16.1658	2.60965	0.0173431	0.11302	NS
sup-12	-0.400478	17.0674	-2.60725	0.0174317	0.113486	NS
F39H2.3	0.30696	18.7739	2.60654	0.0174582	0.113547	NS
ssb-1	-0.370489	21.4723	-2.60544	0.0175094	0.113647	NS
par-1	-0.218263	19.5734	-2.60474	0.017525	0.113647	NS
pigm-1	0.262358	15.9526	2.60473	0.0175257	0.113647	NS
ugt-58	-0.201435	17.2876	-2.60428	0.0175423	0.113647	NS
magu-1	0.197042	16.7877	2.60303	0.0175891	0.113839	NS
T08A11.1	0.23182	20.0859	2.60183	0.017634	0.114018	NS
ech-5	0.26187	19.8116	2.60123	0.0176567	0.114054	NS
F26F12.3	-0.352916	16.0061	-2.59965	0.0177161	0.114326	NS
cdc-5l	-0.245239	19.433	-2.59778	0.0177866	0.114518	NS
ttr-45	0.751402	18.5267	2.59811	0.0178465	0.114518	NS
Y48B6A.1	-0.305315	17.608	-2.59673	0.0178262	0.114518	NS
F43G9.4	-0.240328	17.7467	-2.59669	0.0178279	0.114518	NS
C25H3.3	0.327509	17.1626	2.59641	0.0178385	0.114518	NS
Y54H5A.2	-0.246976	18.6354	-2.59611	0.0178497	0.114518	NS
phg-1	-0.624449	16.5965	-2.5939	0.0180068	0.115303	NS
mel-46	0.219461	17.6414	2.59226	0.0179964	0.115303	NS
R12B2.2	0.325386	15.6819	2.59043	0.0180664	0.115573	NS
C39D10.7	-0.550361	16.5567	-2.59089	0.0181102	0.115629	NS
ech-4	0.260758	20.5052	2.58931	0.0181097	0.115629	NS
cwn-2	-0.280288	16.1146	-2.58853	0.0181396	0.115703	NS
C02F5.3	-0.238882	19.6265	-2.58809	0.0181567	0.115703	NS
dpy-14	-0.694942	18.9302	-2.58839	0.0182181	0.115871	NS
M04B2.4	-0.189345	17.5193	-2.58726	0.0181885	0.115794	NS
zyg-12.1	0.202499	17.7569	2.58519	0.0182685	0.116081	NS
msd-2	0.641435	17.4483	2.58327	0.018417	0.116912	NS
dnj-21	0.288678	18.0321	2.57878	0.0185189	0.117441	NS
mics-1	-0.226014	18.5226	-2.57835	0.0185359	0.117441	NS
ttr-46	0.63157	17.3656	2.57879	0.0185925	0.117688	NS
let-653	0.309036	18.7355	2.57301	0.0187468	0.118551	NS
C05D9.3	-0.503457	18.7595	-2.57121	0.0188862	0.119156	NS
rhgf-2	-0.338462	16.62	-2.56956	0.0188845	0.119156	NS
acl-4	0.269834	16.2935	2.56926	0.0188966	0.119156	NS
eif-2d	0.207591	18.8923	2.56653	0.0190062	0.119734	NS
chd-3	-0.211469	19.508	-2.56323	0.0191395	0.120459	NS
mlt-8	-0.686847	19.5433	-2.56396	0.0191849	0.12053	NS
pas-3	-0.208533	22.8793	-2.56205	0.0191872	0.12053	NS
T05A12.3	-0.311509	16.7514	-2.56156	0.0192071	0.120541	NS
srf-3	-0.259664	17.2806	-2.56014	0.0192649	0.120789	NS
ark-1	-0.247002	17.9006	-2.55916	0.0193049	0.120925	NS
bre-1.1	-0.666888	17.735	-2.55916	0.0193805	0.121169	NS
mbk-2	0.393305	17.8356	2.55771	0.0193643	0.121169	NS
gpcp-2	-0.221349	16.7341	-2.5547	0.019488	0.121726	NS
Y51F10.4	0.29143	16.818	2.55282	0.0195659	0.122024	NS
lrk-1	-0.162444	16.7633	-2.55266	0.0195725	0.122024	NS
cul-3	-0.173515	19.8724	-2.55186	0.0196053	0.122114	NS
dhs-25	0.493651	17.6386	2.5512	0.019696	0.122303	NS
F28C6.9	-0.235858	16.5104	-2.55018	0.0196752	0.122303	NS
nurf-1	0.158074	18.2404	2.54947	0.0197047	0.122303	NS
rpn-11	-0.239937	22.0957	-2.54935	0.0197096	0.122303	NS
coq-6	0.234015	18.9345	2.54688	0.019813	0.122795	NS
pha-1	-0.22413	16.56	-2.5465	0.0198287	0.122795	NS
F33G12.7	-0.295133	16.0208	-2.54613	0.0198445	0.122795	NS
ZK185.5	0.402727	15.9678	2.54571	0.019873	0.122856	NS
rnf-121	-0.280956	16.4016	-2.54489	0.0198963	0.122886	NS
F19C6.5	0.316708	16.1886	2.54423	0.0199241	0.122934	NS
K02E10.4	-0.565932	18.0011	-2.54476	0.0199783	0.122934	NS
eif-3.C	-0.177389	21.8104	-2.54329	0.0199639	0.122934	NS
tag-151	-0.374571	18.454	-2.54327	0.0199645	0.122934	NS
ddl-3	0.234713	19.6183	2.54	0.0201032	0.123587	NS
chts-1	-0.346312	16.2726	-2.53938	0.0201294	0.123634	NS
Y52B11A.8	-0.575759	18.3926	-2.53902	0.0202217	0.12397	NS
rrp-1	-0.310895	17.2988	-2.53722	0.0202216	0.12397	NS
ZK899.2	0.391495	18.1859	2.53485	0.0203297	0.124496	NS
fan-1	0.342337	17.6262	2.53427	0.0203476	0.124496	NS
plin-1	0.316489	22.4947	2.53378	0.0203687	0.124496	NS
rfth-1	0.320402	17.2745	2.53345	0.0203827	0.124496	NS
pgam-5	-0.182768	20.2135	-2.53104	0.0204868	0.125016	NS
W10G11.19	0.328763	15.8938	2.5266	0.0206797	0.125988	NS
gpaa-1	0.248056	17.6471	2.5265	0.020684	0.125988	NS
sur-2	-0.199417	17.297	-2.52418	0.0207851	0.126487	NS
C15C6.1	-0.755841	17.013	-2.5237	0.0208845	0.126615	NS
erm-1	-0.1742	20.6581	-2.52218	0.020873	0.126615	NS
Y92H12BR.3	0.301087	21.7064	2.52155	0.0209009	0.126615	NS
riok-3	0.242384	17.1982	2.52143	0.020906	0.126615	NS
tra-4	-0.252807	18.2418	-2.52124	0.0209144	0.126615	NS
vab-19	-0.177042	15.7584	-2.5211	0.0209208	0.126615	NS
afd-1	0.229324	18.4812	2.51911	0.0210084	0.127008	NS
fbxc-39	0.277985	18.2346	2.51876	0.021024	0.127008	NS
tmem-189	-0.278043	15.663	-2.51759	0.021076	0.127205	NS
sacy-1	-0.158393	18.597	-2.51458	0.0212098	0.127896	NS
dlat-1	-0.169837	22.1328	-2.51233	0.0213105	0.128386	NS
unc-6	-0.215218	16.1487	-2.51188	0.0213307	0.128391	NS
F08F1.4	-0.300567	15.5501	-2.50981	0.0214237	0.12881	NS
rbm-28	-0.250078	16.3237	-2.50947	0.0214392	0.12881	NS
ethe-1	0.406768	17.9551	2.50908	0.0214755	0.128912	NS
F13D12.5	0.56778	17.2942	2.5091	0.0215349	0.129151	NS
ptr-21	-0.48972	16.4765	-2.50551	0.0216684	0.129717	NS
C16A11.2	-0.24147	20.1031	-2.50459	0.0216603	0.129717	NS
srpa-68	-0.187393	19.8139	-2.50396	0.0216892	0.129724	NS
sip-1	0.360309	23.8553	2.50383	0.0217277	0.129819	NS
sir-2.4	0.27686	16.4254	2.50275	0.0217443	0.129819	NS
rps-29	-0.648842	20.3881	-2.50262	0.0218298	0.129978	NS
atad-3	0.189054	21.2103	2.50129	0.0218109	0.129978	NS
copd-1	-0.162995	21.2884	-2.50098	0.0218253	0.129978	NS
acds-10	0.719418	18.142	2.50181	0.021867	0.129992	NS
rbm-5	-0.449711	17.5938	-2.50087	0.0218714	0.129992	NS
pod-2	-0.404204	18.2583	-2.49917	0.0219273	0.130207	NS
lgg-2	-0.290398	17.5827	-2.49672	0.0220215	0.130649	NS
ttc-4	-0.294847	18.61	-2.49564	0.0220714	0.130828	NS
cest-35.1	0.482321	16.5339	2.49419	0.0221822	0.13125	NS
hex-3	0.223176	18.4403	2.49337	0.0221772	0.13125	NS
crt-1	-0.211373	24.174	-2.49132	0.0222724	0.131666	NS
akt-2	0.29361	16.3225	2.49076	0.022299	0.131705	NS
rml-1	-0.224658	21.4749	-2.48944	0.0223609	0.131953	NS
xpo-2	-0.283089	20.8	-2.48836	0.0224112	0.132132	NS
plrg-1	-0.280151	18.5139	-2.48675	0.0224873	0.132435	NS
cutl-27	0.330634	17.2959	2.48642	0.0225026	0.132435	NS
pas-6	-0.223985	19.2628	-2.48581	0.0225315	0.132488	NS
T28C6.7	-0.22748	19.1887	-2.48381	0.0226261	0.132843	NS
ufd-3	-0.226156	19.411	-2.48369	0.022632	0.132843	NS
C33F10.14	0.221084	19.8012	2.48297	0.0226663	0.132926	NS
nrde-3	-0.28663	19.4701	-2.48121	0.0227498	0.133298	NS
F23F1.5	0.268585	17.6906	2.47942	0.0228354	0.133681	NS
arx-1	-0.265887	19.0296	-2.4768	0.022961	0.134273	NS
pak-2	0.27418	15.8371	2.47647	0.0229771	0.134273	NS
abhd-3.1	0.390368	17.0904	2.47545	0.023026	0.134357	NS
C49A1.10	-0.365882	16.5985	-2.47533	0.0230321	0.134357	NS
hgrs-1	0.145524	19.7324	2.47418	0.0230877	0.134563	NS
cus-2	0.260658	17.4646	2.4732	0.0231351	0.134627	NS
K12C11.1	0.287263	19.5124	2.47311	0.0231394	0.134627	NS
nhr-49	-0.25894	17.992	-2.47142	0.0232212	0.134857	NS
F52B11.2	-0.346984	19.6698	-2.47089	0.023247	0.134857	NS
mdt-4	-0.20374	17.8785	-2.47068	0.0232572	0.134857	NS
K02F6.3	-0.380967	17.883	-2.47062	0.0232604	0.134857	NS
C25A11.2	-0.327342	18.6308	-2.46952	0.0233137	0.134931	NS
F28D9.4	-0.244314	17.6024	-2.46952	0.0233138	0.134931	NS
Y105C5B.11	-0.3034	16.3161	-2.46765	0.0234052	0.135342	NS
C46H3.2	-0.930268	19.7191	-2.46667	0.0235357	0.135598	NS
Y17G9B.5	-0.152035	17.3917	-2.46549	0.0235113	0.135598	NS
inx-14	0.369443	18.7918	2.46552	0.0235218	0.135598	NS
sqst-1	0.295279	17.5596	2.46539	0.0235161	0.135598	NS
hxk-2	0.327547	18.9776	2.46466	0.0235521	0.135598	NS
Y75B8A.8	-0.202457	17.814	-2.46253	0.0236575	0.136087	NS
dhs-28	0.742965	20.7898	2.46324	0.0237049	0.136242	NS
gst-39	0.645283	17.7001	2.46217	0.0237582	0.13643	NS
F44E2.9	0.343998	16.4081	2.45969	0.0237984	0.136542	NS
F49D11.10	-0.217694	18.1336	-2.45924	0.0238209	0.136552	NS
ttr-2	0.73359	17.6622	2.45955	0.023888	0.136582	NS
lap-1	0.225263	20.8358	2.45863	0.023851	0.136579	NS
lsy-2	-0.358275	16.8132	-2.45831	0.0238669	0.136579	NS
T06A1.5	-0.312514	15.7642	-2.45648	0.0239587	0.136868	NS
abhd-11.2	0.269061	18.2464	2.45604	0.0239804	0.136874	NS
gna-1	0.485806	16.4491	2.45462	0.0241194	0.137366	NS
yars-2	0.227794	17.1946	2.45366	0.0240998	0.137366	NS
col-166	-0.908751	17.1858	-2.45419	0.0241566	0.137406	NS
blos-1	0.244606	17.8482	2.45309	0.0241287	0.137366	NS
gadr-6	-0.330975	16.1761	-2.45191	0.0241882	0.137468	NS
ifb-1	-0.613823	18.9962	-2.45259	0.0242376	0.137565	NS
let-60	-0.294286	20.4356	-2.45075	0.0242468	0.137565	NS
duxl-1	0.301129	15.7732	2.45012	0.0242786	0.137627	NS
T01D3.6	-0.842779	16.7627	-2.44813	0.0244637	0.138439	NS
blos-2	0.47407	16.6955	2.4477	0.024445	0.138439	NS
rbm-17	0.377645	16.9683	2.44574	0.0245016	0.138536	NS
C05C10.3	0.335398	17.9738	2.44218	0.0246845	0.13945	NS
C03B1.7	0.302244	16.5632	2.44066	0.0247627	0.139773	NS
F18H3.4	-0.369804	17.9267	-2.43956	0.0248195	0.139945	NS
C47G2.4	0.292755	16.9579	2.43925	0.0248355	0.139945	NS
D1014.5	-0.488609	16.176	-2.43861	0.0249402	0.14016	NS
aman-2	0.149162	18.2954	2.43676	0.0249648	0.14016	NS
sma-9	-0.183051	16.7611	-2.4366	0.0249733	0.14016	NS
mrpl-37	-0.202851	19.1584	-2.43658	0.0249745	0.14016	NS
exos-1	0.17507	18.4511	2.43648	0.0249795	0.14016	NS
nol-16	-0.211978	16.592	-2.43478	0.0250683	0.14054	NS
maa-1	0.334873	16.1029	2.43382	0.0251182	0.140597	NS
F43B10.1	-0.355804	16.6052	-2.43377	0.025121	0.140597	NS
dhs-13	-0.148988	18.8685	-2.43304	0.0251593	0.140692	NS
dnj-2	0.300932	18.3225	2.4318	0.0252242	0.140929	NS
fut-3	-0.214382	19.641	-2.43142	0.0252442	0.140929	NS
mig-14	0.419377	19.1688	2.43175	0.0252963	0.141101	NS
uig-1	-0.212136	15.4434	-2.42847	0.0253997	0.141525	NS
C03H5.3	-0.257197	17.4707	-2.42818	0.0254151	0.141525	NS
5N224	-0.379802	16.385	-2.42734	0.0254598	0.141655	NS
Y39B6A.33	-0.20574	16.3889	-2.42668	0.0254947	0.14173	NS
acbp-1	0.471623	21.1542	2.42734	0.0255451	0.141786	NS
R08E3.3	-0.252228	16.7958	-2.42504	0.0255818	0.141786	NS
ahsa-1	-0.242653	21.1865	-2.42475	0.0255974	0.141786	NS
M60.4	1.25853	17.5761	2.42542	0.0256468	0.141786	NS
lpd-7	-0.298141	18.3327	-2.42455	0.0256079	0.141786	NS
C15B12.1	0.244589	15.726	2.42432	0.0256202	0.141786	NS
H04M03.3	-0.229645	18.317	-2.42367	0.0256546	0.141786	NS
nduo-4	-1.89776	19.4283	-2.4239	0.0257284	0.141973	NS
D2005.3	0.351484	17.8381	2.42223	0.0257315	0.141973	NS
rpn-3	-0.22811	22.5906	-2.4211	0.025792	0.142189	NS
T20B12.7	-0.182821	21.0208	-2.41852	0.0259312	0.142837	NS
syx-4	-0.434163	18.0907	-2.41908	0.0259707	0.142936	NS
fzr-1	-0.243298	16.841	-2.41736	0.0259934	0.142942	NS
crh-1	0.263508	18.2612	2.41235	0.0262656	0.144233	NS
F48E8.4	0.20678	16.8442	2.41224	0.0262717	0.144233	NS
F25H9.6	0.248938	17.564	2.40988	0.0264005	0.14482	NS
Y48A6B.3	-0.258714	20.0875	-2.40843	0.0264803	0.145137	NS
seip-1	0.267761	16.4693	2.40707	0.026555	0.145427	NS
Y75B8A.6	-0.31569	16.8198	-2.40628	0.0265989	0.145545	NS
F35H10.10	-0.42216	16.2595	-2.40602	0.0266336	0.145545	NS
Y87G2A.2	0.614885	16.4878	2.40626	0.0266866	0.145545	NS
T09A5.5	-0.254251	18.3439	-2.40544	0.0266452	0.145545	NS
F35G12.7	0.250062	16.3743	2.40483	0.0266788	0.145545	NS
Y116A8C.9	0.364748	17.1708	2.40296	0.0267828	0.145949	NS
C08F1.10	0.364053	16.5063	2.40125	0.0268776	0.146346	NS
Y87G2A.1	-0.242791	17.7381	-2.39952	0.0269742	0.146648	NS
smu-2	-0.136733	17.9913	-2.3994	0.0269808	0.146648	NS
T13G4.4	0.291788	15.6456	2.39907	0.0269995	0.146648	NS
F54B3.1	0.171968	17.0959	2.39423	0.0272716	0.148004	NS
F53B1.2	-0.340855	16.5324	-2.39269	0.0273587	0.148355	NS
hil-5	-0.225384	19.2031	-2.39073	0.02747	0.148837	NS
Y48E1B.8	-0.53499	16.8623	-2.38876	0.0276591	0.149448	NS
coa-1	0.295023	15.67	2.3876	0.0276488	0.149448	NS
F14D7.2	-0.337503	18.7319	-2.38719	0.0276723	0.149448	NS
rps-0	-0.171021	23.8245	-2.38717	0.0276731	0.149448	NS
F54E12.2	0.42325	17.4995	2.38685	0.0277254	0.149609	NS
rpn-2	-0.199287	22.5512	-2.38475	0.0278124	0.149956	NS
mrps-7	0.289348	16.5463	2.38337	0.027892	0.150162	NS
mut-7	0.300418	18.8003	2.3833	0.0278961	0.150162	NS
got-1.2	1.00459	18.1601	2.37747	0.0283232	0.152338	NS
cec-4	-0.21975	18.6504	-2.37494	0.0283821	0.152425	NS
sfxn-1.5	-0.231638	17.7697	-2.37488	0.0283855	0.152425	NS
patr-1	-0.202631	18.8798	-2.37412	0.0284303	0.152542	NS
prp-19	-0.197978	21.7394	-2.37302	0.0284948	0.152682	NS
pad-2	0.297213	16.9371	2.37289	0.0285024	0.152682	NS
sptf-3	-0.203675	16.9484	-2.37217	0.0285451	0.152726	NS
his-74	0.208962	16.7346	2.37197	0.0285568	0.152726	NS
T01G9-2.1	-0.233963	17.6769	-2.37081	0.0286253	0.152968	NS
dhp-2	-0.363085	17.884	-2.36997	0.0286749	0.15311	NS
got-2.1	0.339441	22.0295	2.36987	0.0287024	0.153117	NS
ruvb-2	-0.159154	21.3009	-2.36899	0.0287332	0.153117	NS
F36A2.9	-0.365276	19.513	-2.3689	0.0287596	0.153117	NS
Y92H12BM.1	0.3317	16.1912	2.36839	0.0287687	0.153117	NS
R05G6.4	-0.170999	19.6476	-2.36715	0.0288425	0.153264	NS
T04D3.5	-0.43718	16.3099	-2.36715	0.028879	0.153264	NS
B0495.7	0.214912	20.8896	2.36607	0.0289065	0.153264	NS
gtap-1	0.276361	16.3308	2.36558	0.0289361	0.153264	NS
copg-1	-0.138136	21.5613	-2.36558	0.0289363	0.153264	NS
atx-3	-0.292366	18.5685	-2.36525	0.0289559	0.153264	NS
ebp-2	-0.282163	20.5822	-2.36521	0.0289584	0.153264	NS
gst-20	-0.368702	18.6675	-2.36385	0.029061	0.153684	NS
ges-1	0.321812	16.4775	2.36273	0.0291067	0.153803	NS
ddx-17	-0.268011	21.0663	-2.36157	0.0291764	0.154049	NS
2024-01-01	-0.192585	18.8081	-2.36079	0.0292233	0.154173	NS
F41G3.3	-0.199553	15.4236	-2.36009	0.0292656	0.154274	NS
R151.8A	0.289791	20.0445	2.35791	0.0293976	0.154807	NS
acsd-1	0.470582	17.316	2.3585	0.0294369	0.154807	NS
immt-2	-0.373697	19.532	-2.3581	0.0294229	0.154807	NS
pde-3	0.24038	16.2257	2.35668	0.029472	0.154868	NS
ucr-2.3	0.204043	19.8359	2.35538	0.0295512	0.155161	NS
cra-1	-0.234338	20.725	-2.35374	0.0296511	0.155562	NS
rpt-1	-0.240458	21.8881	-2.35281	0.0297081	0.155738	NS
tspo-1	0.486918	20.3524	2.35311	0.0297808	0.155875	NS
ZK792.5	-0.223341	17.9089	-2.35161	0.0297812	0.155875	NS
apy-1	0.399603	19.6445	2.35182	0.0298427	0.156073	NS
ent-2	0.41395	18.3895	2.35012	0.0299472	0.156496	NS
pyk-2	0.550675	17.1388	2.34943	0.0300066	0.156554	NS
F54A3.5	-0.240048	18.8688	-2.34796	0.0300059	0.156554	NS
cox-16	-0.288444	17.1545	-2.34758	0.0300293	0.156554	NS
C55A6.1	-0.365227	16.3038	-2.3452	0.030177	0.157092	NS
copa-1	-0.163409	20.9768	-2.3448	0.0302016	0.157092	NS
T01G9.2	-0.314002	18.4281	-2.34477	0.0302035	0.157092	NS
imp-2	-0.2782	20.0986	-2.34317	0.0303033	0.157263	NS
oxy-4	0.313159	19.1786	2.34304	0.030311	0.157263	NS
F37F2.2	-0.167835	18.0742	-2.34278	0.0303275	0.157263	NS
Y43F8C.7	-0.2807	19.5096	-2.34272	0.0303314	0.157263	NS
C10G8.8	-0.238696	15.7526	-2.34222	0.0303626	0.157301	NS
alh-10	0.42198	16.969	2.34028	0.0305055	0.157835	NS
cif-1	-0.202732	21.4213	-2.33981	0.0305134	0.157835	NS
epg-9	-0.34807	16.6797	-2.3328	0.0309558	0.159971	NS
snr-6	-0.230673	22.4362	-2.33226	0.03099	0.159971	NS
K04A8.1	-0.375436	16.4499	-2.33195	0.0310101	0.159971	NS
slc-25a32	-0.185332	15.9956	-2.33175	0.0310228	0.159971	NS
F38E9.1	0.207372	16.7055	2.33122	0.0310567	0.160021	NS
snx-6	-0.149561	19.3473	-2.32959	0.0311607	0.160419	NS
sec-23	-0.191771	20.6668	-2.32925	0.0311824	0.160419	NS
flp-1	0.279832	18.0265	2.3279	0.0312689	0.160739	NS
Y82E9BR.16	0.22303	18.6833	2.32556	0.0314192	0.161386	NS
Y55F3AM.13	-0.18106	22.194	-2.32441	0.0314935	0.161599	NS
F45G2.8	0.189088	18.9527	2.32405	0.0315172	0.161599	NS
pph-6	0.216447	18.4407	2.32379	0.0315338	0.161599	NS
Y57G11C.31	-0.408053	17.0433	-2.32372	0.0315601	0.161608	NS
sup-36	-0.366027	18.0637	-2.32	0.0317934	0.162677	NS
immp-2	-0.190183	16.5169	-2.31891	0.0318506	0.162844	NS
rft-2	0.2207	15.6756	2.31718	0.0319641	0.163298	NS
pmp-4	0.577852	16.1078	2.3164	0.0321089	0.163912	NS
ttr-6	0.338119	18.9522	2.31281	0.0322526	0.164051	NS
rbg-2	0.160595	18.4061	2.31276	0.0322546	0.164051	NS
F43H9.3	0.237881	16.2101	2.31253	0.0322698	0.164051	NS
nhr-69	-0.197904	16.2419	-2.31245	0.032275	0.164051	NS
vps-22	0.187696	17.1543	2.31241	0.0322776	0.164051	NS
F37C4.6	-0.258975	17.527	-2.3122	0.0322915	0.164051	NS
H06I04.6	0.263126	16.4134	2.31193	0.0323096	0.164051	NS
exc-7	-0.307766	16.6177	-2.31092	0.0323764	0.164264	NS
cir-1	-0.178548	16.7542	-2.31024	0.0324215	0.164305	NS
cerk-1	0.422238	16.9229	2.31038	0.0324342	0.164305	NS
mek-1	-0.38737	18.9729	-2.30905	0.0325664	0.164752	NS
magu-4	-0.201479	16.2031	-2.30797	0.0325722	0.164752	NS
rom-1	0.291615	17.0043	2.30635	0.0326801	0.165097	NS
hmg-12	-0.199988	20.3781	-2.3062	0.0326903	0.165097	NS
Y38A10A.7	-0.429461	18.1629	-2.30517	0.0328381	0.165584	NS
F54C8.4	-0.182671	18.7909	-2.30374	0.0328553	0.165584	NS
pod-1	-0.258483	20.8723	-2.30349	0.0328719	0.165584	NS
Y48G10A.3	0.171333	19.4831	2.30311	0.0328975	0.165584	NS
enpl-1	-0.217504	24.3474	-2.3029	0.0329117	0.165584	NS
K09E2.3	0.311536	16.9916	2.30169	0.0329932	0.165868	NS
lsm-3	1.15232	18.5048	2.3014	0.033108	0.166116	NS
tbc-17	0.178068	17.0367	2.2999	0.0331141	0.166116	NS
pqbp-1.1	-0.312525	18.1143	-2.29972	0.0331262	0.166116	NS
cls-3	-0.162147	16.6765	-2.29947	0.0331429	0.166116	NS
elc-1	-0.197787	21.1213	-2.29848	0.0332104	0.166328	NS
hpo-32	0.618676	16.867	2.29732	0.0333846	0.166948	NS
spt-4	-0.224593	18.0043	-2.29602	0.0333777	0.166948	NS
tbg-1	0.18219	19.8643	2.29459	0.0334754	0.167276	NS
mrps-14	-0.210597	19.572	-2.29359	0.0335437	0.167491	NS
T05A12.4	-0.307064	15.7158	-2.29237	0.033627	0.16778	NS
snb-1	0.32648	19.8859	2.29122	0.033706	0.168048	NS
ptpn-22	-0.192927	18.4463	-2.29028	0.0337709	0.168244	NS
dhs-4	0.27346	16.7737	2.28964	0.0338148	0.168337	NS
hacl-1	0.38647	19.8566	2.28958	0.0338978	0.168496	NS
F38A1.8	-0.151191	19.9136	-2.2885	0.0338939	0.168496	NS
lonp-2	0.550832	16.642	2.28855	0.0339867	0.168811	NS
pad-1	-0.163801	18.15	-2.28667	0.0340209	0.168855	NS
sut-2	-0.413618	16.4495	-2.28603	0.0340874	0.169058	NS
brc-2	-0.188859	17.1552	-2.28482	0.0341494	0.169239	NS
dnj-28	-0.248373	16.3157	-2.28426	0.0341882	0.169305	NS
pcn-1	0.256615	23.0748	2.28274	0.034294	0.169702	NS
acox-1.1	0.789456	17.6891	2.28258	0.0344017	0.170107	NS
cap-1	-0.207313	21.0767	-2.28057	0.0344465	0.170202	NS
cest-6	-0.220949	16.4384	-2.27995	0.0344895	0.170287	NS
idhb-1	0.290186	20.9803	2.27802	0.0346255	0.170507	NS
his-48	0.270081	25.2884	2.27772	0.0346469	0.170507	NS
unc-108	0.193116	20.7135	2.2777	0.0346484	0.170507	NS
mig-38	-0.170297	18.8985	-2.27761	0.0346543	0.170507	NS
let-92	-0.24556	21.1408	-2.27697	0.0346996	0.170507	NS
F33H2.3	0.238585	21.3062	2.27686	0.0347076	0.170507	NS
T23G5.2	0.264972	19.4843	2.27676	0.0347144	0.170507	NS
ttr-25	0.483128	18.9547	2.27403	0.0350048	0.171561	NS
eat-20	-0.32477	17.513	-2.27184	0.0350637	0.171561	NS
mrpl-45	0.243964	18.4889	2.27144	0.0350922	0.171561	NS
pigt-1	0.162249	18.7834	2.2713	0.0351023	0.171561	NS
Y54F10AR.1	-0.150152	18.3897	-2.27129	0.0351031	0.171561	NS
ugt-57	-0.365215	16.7167	-2.27101	0.035123	0.171561	NS
msa-1	0.7368	16.8639	2.27146	0.035188	0.171561	NS
D1069.3	-0.17161	17.6769	-2.27079	0.035139	0.171561	NS
W02G9.3	0.227118	18.1607	2.27062	0.0351513	0.171561	NS
F33E2.5	-0.373412	17.7426	-2.27065	0.035172	0.171561	NS
cct-1	-0.197261	23.0949	-2.2695	0.0352312	0.171587	NS
sac-1	-0.190523	18.356	-2.26913	0.0352579	0.171587	NS
vps-39	0.201854	17.0721	2.26894	0.035271	0.171587	NS
adbp-1	-0.240158	17.8807	-2.26842	0.0353085	0.171643	NS
E04F6.8	0.601472	17.1579	2.26805	0.0354327	0.171994	NS
chch-3	-0.183617	21.0911	-2.26684	0.0354222	0.171994	NS
vha-18	-0.434116	16.7838	-2.2657	0.0355468	0.172295	NS
K04C2.2	-0.28297	18.572	-2.26512	0.0355465	0.172295	NS
unc-5	-0.227053	16.4889	-2.26387	0.0356369	0.172605	NS
cbp-1	-0.246965	15.9594	-2.26275	0.0357177	0.17287	NS
C49F8.3	-0.976723	18.3394	-2.2624	0.0358412	0.17311	NS
sqv-2	0.23663	17.9586	2.26178	0.0357884	0.173086	NS
nab-1	-0.497173	18.664	-2.26234	0.0358456	0.17311	NS
R08D7.1	-0.211812	17.9611	-2.26063	0.0358717	0.17311	NS
toe-1	-0.222126	18.3085	-2.26	0.0359182	0.173208	NS
rga-9	0.196877	15.8423	2.25862	0.0360186	0.173451	NS
R148.3	-0.111865	19.297	-2.25859	0.036021	0.173451	NS
mrps-2	-0.193337	18.7491	-2.25808	0.036058	0.173503	NS
H40L08.1	0.192827	17.5325	2.2575	0.0361005	0.173581	NS
ZK105.1	-0.41106	18.585	-2.25733	0.0361959	0.173788	NS
coh-1	-0.262699	18.0689	-2.25675	0.0361558	0.173721	NS
eif-3.G	-0.160692	21.4381	-2.25362	0.0363859	0.174573	NS
vps-18	0.196499	18.2821	2.25237	0.0364787	0.174892	NS
F13H8.2	-0.199307	18.1021	-2.25174	0.0365253	0.174938	NS
amx-1	-0.190168	17.0754	-2.25152	0.0365413	0.174938	NS
T09F3.2	0.216765	18.6985	2.24999	0.0366548	0.175266	NS
T19C3.2	-0.702154	18.0278	-2.25028	0.0367321	0.175345	NS
pqn-21	-0.163003	15.9604	-2.24967	0.0366784	0.175266	NS
tbck-1	-0.173487	15.7376	-2.24953	0.0366892	0.175266	NS
vps-16	0.165949	17.9612	2.2472	0.0368626	0.175826	NS
F17A9.5	0.883704	16.8114	2.24763	0.0369295	0.175907	NS
T19C3.5	0.337251	18.0393	2.24689	0.036886	0.175826	NS
EEED8.2	-0.246762	16.8098	-2.24538	0.0369988	0.17611	NS
ptc-3	-0.559406	17.0617	-2.24536	0.0370994	0.176462	NS
wdr-46	-0.211653	16.9985	-2.24269	0.037201	0.176818	NS
hbs-1	0.15222	18.2051	2.24199	0.0372543	0.176854	NS
lon-8	-0.719068	16.8451	-2.24257	0.0373095	0.176854	NS
M142.5	0.391019	19.6244	2.24244	0.0373029	0.176854	NS
gpdh-3	0.162026	20.102	2.24118	0.0373153	0.176854	NS
C05D12.5	-0.510474	17.9126	-2.24161	0.0373822	0.177044	NS
gei-1	-0.345579	16.8216	-2.23954	0.0374394	0.177118	NS
fcho-1	0.189317	17.1872	2.23938	0.0374512	0.177118	NS
T22C1.1	-0.402506	17.1265	-2.23834	0.0375535	0.177474	NS
cct-8	-0.183553	22.4381	-2.23568	0.0377327	0.178194	NS
brd-1	0.314059	17.4397	2.23484	0.0377971	0.178371	NS
hsp-16.1	1.87928	19.8571	2.23455	0.0379188	0.178818	NS
hsp-4	0.126849	23.7671	2.23095	0.0380949	0.17952	NS
H14A12.3	0.25233	17.18	2.23037	0.0381396	0.179603	NS
pyk-1	-0.228474	22.4624	-2.22953	0.0382046	0.179782	NS
rle-1	0.16708	16.2535	2.22804	0.0383197	0.180195	NS
obr-3	-0.165617	17.0955	-2.22739	0.0383705	0.180306	NS
T12G3.2	-0.208148	17.2022	-2.22703	0.0383978	0.180306	NS
atx-2.1	-0.173259	19.869	-2.22565	0.0385057	0.180639	NS
K12D12.5	-0.345015	16.1411	-2.22542	0.0385233	0.180639	NS
ZC449.2	-0.491919	16.1879	-2.22566	0.0386052	0.180895	NS
ced-6	0.148385	15.8857	2.22298	0.0387131	0.181273	NS
haf-2	0.181989	17.0665	2.22254	0.038748	0.181308	NS
Y39G10AR.9	0.281906	20.2291	2.22191	0.0387975	0.181411	NS
cyp-42a1	-0.206574	15.7197	-2.22058	0.038901	0.181762	NS
grl-10	-0.597687	16.9605	-2.22086	0.0389801	0.18188	NS
F12F6.1	-0.195841	19.8546	-2.22025	0.0389274	0.181762	NS
aho-3	-0.334746	18.4247	-2.21895	0.0390313	0.18198	NS
ZK287.1	-0.376197	16.3669	-2.21835	0.0390789	0.18198	NS
ears-2	0.19593	16.1939	2.21792	0.0391111	0.18198	NS
taf-8	-0.348676	16.578	-2.21767	0.0391302	0.18198	NS
pot-1	0.854519	16.9836	2.21819	0.0391905	0.182092	NS
fecl-1	0.207994	17.0803	2.21756	0.039139	0.18198	NS
sdc-1	-0.1986	17.2292	-2.2157	0.039286	0.182407	NS
clpp-1	0.214398	18.4182	2.21519	0.0393262	0.182466	NS
coa-6	1.08282	17.1472	2.21519	0.0394281	0.182683	NS
Y26E6A.3	0.237649	15.5851	2.21431	0.0393966	0.182664	NS
sec-16a.2	-0.165559	18.1856	-2.21247	0.039543	0.183087	NS
pid-2	0.683878	15.6762	2.21269	0.0396266	0.183346	NS
Y55F3BR.2	-0.287024	15.8278	-2.21037	0.0397103	0.183605	NS
fars-2	0.281264	18.8427	2.21001	0.0397391	0.18361	NS
rpb-3	-0.192691	17.3726	-2.20867	0.0398465	0.183978	NS
nepr-1	0.359878	22.917	2.20752	0.0400244	0.184287	NS
mrp-2	0.382309	17.2707	2.20629	0.0400623	0.184287	NS
C30F12.2	0.158051	16.134	2.20567	0.0400878	0.184287	NS
folt-2	1.37764	15.9231	2.20599	0.040164	0.184287	NS
mrpl-28	-0.210088	19.187	-2.20534	0.0401148	0.184287	NS
josd-1	0.206561	16.9342	2.20523	0.0401232	0.184287	NS
R05F9.6	-0.199841	20.9073	-2.20509	0.0401345	0.184287	NS
plx-1	-0.184782	16.9748	-2.20499	0.0401425	0.184287	NS
lrch-1	0.50685	19.3419	2.20545	0.0402082	0.184362	NS
row-1	0.18696	18.0694	2.20484	0.0401551	0.184287	NS
F35H12.5	0.364132	16.3631	2.20326	0.0402829	0.184577	NS
Y49A10A.2	-0.264512	17.5651	-2.20248	0.0403457	0.184737	NS
Y75B8A.18	0.340559	16.1424	2.20082	0.0404807	0.185226	NS
let-363	0.125678	19.7707	2.19966	0.0405758	0.185533	NS
nprl-3	0.2957	15.9879	2.19829	0.0406877	0.185916	NS
usp-39	-0.225558	18.8479	-2.19504	0.0409541	0.18692	NS
alh-1	0.200758	22.2974	2.19492	0.0409637	0.18692	NS
Y54F10AR.2	0.256759	16.9871	2.19232	0.0411783	0.18777	NS
pas-2	-0.226854	20.2591	-2.19061	0.0413202	0.188287	NS
pes-4	-0.382624	17.7232	-2.19026	0.0413912	0.188352	NS
F53A10.2	-0.132989	15.6611	-2.1897	0.041396	0.188352	NS
T26C11.4	-0.209668	16.4732	-2.18941	0.0414197	0.188352	NS
unc-129	-0.191758	16.6887	-2.18846	0.0414986	0.188581	NS
nhr-119	-0.29904	15.9989	-2.18764	0.0415672	0.188763	NS
dnj-8	-0.27594	18.4639	-2.18612	0.041694	0.189134	NS
nsun-1	-0.249303	19.0543	-2.18598	0.0417061	0.189134	NS
mans-3	-0.180641	15.9384	-2.18517	0.0417732	0.189309	NS
acdh-9	0.282241	17.9406	2.18311	0.0419469	0.189822	NS
sqv-8	0.230095	16.2818	2.18256	0.0419932	0.189822	NS
rps-28	0.444942	23.0037	2.18303	0.0420568	0.189944	NS
suf-1	-0.154058	19.2019	-2.18248	0.0419996	0.189822	NS
let-711.1	-0.243195	21.4603	-2.18246	0.042001	0.189822	NS
ttr-15	0.96921	16.8336	2.18126	0.0422059	0.190362	NS
odr-3	0.256913	16.8143	2.17955	0.0422472	0.190362	NS
F21C10.10	-0.31064	18.0884	-2.17935	0.0422639	0.190362	NS
mip-1	-0.260724	16.9208	-2.17934	0.0422644	0.190362	NS
rpl-3	-0.150173	24.1223	-2.17856	0.0423305	0.19053	NS
rpb-2	-0.159301	20.233	-2.178	0.0423786	0.190617	NS
syd-2	-0.277861	17.7739	-2.17652	0.0425042	0.191053	NS
mms-19	0.235133	17.6102	2.17419	0.0427028	0.191808	NS
B0361.6	-0.156185	17.1496	-2.17387	0.0427301	0.191808	NS
gln-2	0.48991	15.7712	2.17071	0.0431061	0.193364	NS
C47D12.2	-0.212223	17.1288	-2.16753	0.0432755	0.193993	NS
lem-2	-0.128523	21.4308	-2.16695	0.043326	0.194088	NS
mrpl-24	-0.175221	18.5517	-2.16646	0.0433686	0.194147	NS
pqn-32	-0.829447	18.3436	-2.16616	0.0434995	0.194339	NS
miro-1	-0.197643	18.1396	-2.16532	0.0434671	0.194339	NS
mig-2	-0.235325	16.9253	-2.16515	0.0434819	0.194339	NS
K05B2.2	0.341573	16.2594	2.16457	0.0435328	0.194356	NS
dod-23	0.904349	17.9515	2.1646	0.0436351	0.194682	NS
ufd-2	-0.151955	19.8265	-2.16238	0.0437231	0.194882	NS
F27D4.7	-0.350634	17.0566	-2.1622	0.0437388	0.194882	NS
emc-2	-0.12451	20.4797	-2.16087	0.0438557	0.195193	NS
aatf-1	-0.197536	16.8563	-2.16007	0.0439254	0.195193	NS
pges-2	-0.273982	19.3473	-2.16004	0.0439286	0.195193	NS
F02H6.2	0.305986	18.3121	2.15966	0.0439616	0.195193	NS
fbxc-51	-0.321401	18.7442	-2.15946	0.0439855	0.195193	NS
F44E2.8	-0.243621	19.3932	-2.1592	0.0440022	0.195193	NS
ZK973.1	0.162904	16.211	2.15888	0.0440298	0.195193	NS
rpn-7	-0.196428	21.9805	-2.15872	0.0440445	0.195193	NS
tag-65	0.221233	16.8539	2.15826	0.0440851	0.195242	NS
W05H9.2	-0.371068	17.5749	-2.15794	0.044138	0.195346	NS
slc-36.1	0.274262	17.026	2.15699	0.0441969	0.195476	NS
cbd-1	0.228362	15.538	2.15394	0.0444664	0.196442	NS
mrpl-49	-0.245353	16.7103	-2.15385	0.0444747	0.196442	NS
krr-1	-0.267251	17.7586	-2.15258	0.0445873	0.196808	NS
set-10	-0.225888	17.5933	-2.15203	0.0446365	0.196894	NS
pqn-83	0.262259	17.58	2.15157	0.044677	0.196942	NS
F13D2.1	0.645832	18.4133	2.1513	0.0448068	0.197382	NS
pezo-1	0.183803	19.4562	2.14844	0.0449567	0.197911	NS
cee-1	-0.214383	19.4809	-2.1466	0.0451218	0.198506	NS
suds-3	0.214423	16.4034	2.14588	0.0451868	0.19866	NS
igcm-3	-0.372654	17.7725	-2.1452	0.0452911	0.198854	NS
T23D8.3	-0.128987	16.0649	-2.14479	0.0452846	0.198854	NS
ssp-35	0.611671	15.9098	2.14517	0.0453572	0.199012	NS
T08G5.3	-0.355558	15.7588	-2.14342	0.0454636	0.199347	NS
mrps-18b	-0.311474	19.1529	-2.14041	0.0456827	0.200176	NS
sid-5	0.345858	16.3851	2.13982	0.0457349	0.200272	NS
trap-1	-0.17971	22.3537	-2.13903	0.0458069	0.200421	NS
dph-1	-0.350259	17.5561	-2.13895	0.0458295	0.200421	NS
pink-1	0.309735	16.0249	2.13772	0.0459263	0.200712	NS
Y47G6A.7	-0.156883	15.7507	-2.13693	0.0459991	0.200897	NS
dhfr-1	-0.332048	19.4014	-2.13576	0.0461368	0.201233	NS
jmjd-3.1	-0.190777	15.7732	-2.13552	0.0461276	0.201233	NS
grl-5	-0.621438	17.1186	-2.13516	0.0462681	0.201673	NS
rmd-1	-0.63032	19.6314	-2.13281	0.0464848	0.202484	NS
nst-1	-0.225223	18.5254	-2.13003	0.0466341	0.203001	NS
syd-9	-0.406313	17.7603	-2.13003	0.0467232	0.203085	NS
ZK1098-1	-0.200089	17.8852	-2.12897	0.046732	0.203085	NS
dpyd-1	-0.277921	18.3336	-2.12883	0.0467454	0.203085	NS
mlt-10	-0.568264	16.5643	-2.12892	0.0468444	0.203214	NS
dli-1	-0.157616	19.4533	-2.12767	0.0468534	0.203214	NS
pat-3	-0.262928	19.8384	-2.12752	0.0468673	0.203214	NS
grl-16	-0.882015	17.9258	-2.12656	0.0470641	0.203728	NS
cacn-1	-0.163216	18.6608	-2.12605	0.0470039	0.203673	NS
ZK643.5	-0.184021	18.4862	-2.12526	0.047078	0.203728	NS
rpb-11	-0.341005	17.1786	-2.12477	0.0471234	0.203791	NS
rgr-1	-0.181845	18.3973	-2.12422	0.0471749	0.20388	NS
C17E4.6	-0.14902	18.4847	-2.12018	0.0475545	0.205387	NS
F13D11.4	-0.399116	17.1636	-2.11937	0.047687	0.205825	NS
F36F12.1	-0.443101	16.1305	-2.11841	0.0478158	0.206146	NS
atg-16.1	-0.150398	17.4923	-2.11733	0.0478236	0.206146	NS
noa-1	0.2173	18.0835	2.11674	0.0478799	0.206186	NS
kap-1	0.208701	15.5975	2.11652	0.0479005	0.206186	NS
inx-3	0.34403	19.9148	2.11658	0.0479604	0.206186	NS
rnf-113	-0.174539	17.074	-2.11567	0.0479812	0.206186	NS
K07C5.2	0.294979	18.9648	2.11559	0.0479887	0.206186	NS
F37C4.5	0.395164	19.5926	2.11562	0.0480806	0.206447	NS
let-19	-0.150936	17.2869	-2.11426	0.0481157	0.206464	NS
scav-3	0.205706	19.3294	2.11375	0.0481643	0.206491	NS
rps-11	-0.241894	24.0768	-2.11354	0.0481844	0.206491	NS
epg-6	-0.212265	18	-2.11193	0.0483379	0.207015	NS
T25B9.9	0.249914	21.3281	2.11113	0.0484152	0.207212	NS
pnp-1	0.362681	19.492	2.11137	0.0484809	0.207313	NS
lag-1	-0.201385	16.5725	-2.11023	0.0485013	0.207313	NS
F36D4.5	-0.172641	17.5233	-2.10903	0.0486163	0.20767	NS
par-3	0.269845	17.2004	2.1082	0.0486969	0.207769	NS
tnt-3	-0.4018	18.0639	-2.10842	0.0487665	0.207769	NS
pnk-1	0.273511	16.5762	2.10804	0.048712	0.207769	NS
zfp-1	-0.190967	18.9647	-2.10734	0.0487795	0.207769	NS
gei-13	-0.547456	18.8528	-2.1077	0.0488537	0.207769	NS
C02D5.4	0.258734	19.3853	2.10678	0.0488335	0.207769	NS
T21H3.1	0.365384	17.0198	2.10668	0.0488591	0.207769	NS
rga-4	0.344259	18.6901	2.10568	0.0489842	0.208167	NS
T04C9.1	-0.138751	17.8637	-2.10469	0.0490356	0.208232	NS
hint-1	0.384977	18.7389	2.10486	0.0491114	0.208307	NS
eif-3.B	-0.156093	21.7805	-2.10441	0.0490625	0.208232	NS
vab-1	-0.21233	16.5215	-2.1032	0.0491802	0.208465	NS
cox-6b	0.611069	21.237	2.10166	0.0494393	0.208974	NS
mtm-3	-0.219899	19.0892	-2.10096	0.0493983	0.208974	NS
egrh-1	0.243798	16.1981	2.10095	0.0493996	0.208974	NS
lin-26	-0.418709	17.6935	-2.10132	0.0494556	0.208974	NS
nlt-1	0.79247	18.2691	2.10082	0.0495212	0.208974	NS
F13G3.7	0.25787	17.2919	2.10002	0.0494903	0.208974	NS
C27H6.9	0.225909	17.6675	2.09983	0.0495086	0.208974	NS
K11D2.1	0.184042	16.4203	2.09869	0.0496204	0.209259	NS
gtbp-1	-0.143678	23.0741	-2.098	0.0496882	0.209412	NS
R10D12.13	-0.28431	16.5817	-2.09616	0.0498687	0.209911	NS
prp-4	-0.220296	19.1659	-2.09615	0.0498701	0.209911	NS
F40F8.11	-0.167186	18.7937	-2.0949	0.049993	0.210295	NS
B0507.1	-0.419389	16.6512	-2.09487	0.0500839	0.21041	NS
mbk-2	-0.279101	18.5831	-2.09404	0.0500787	0.21041	NS
mdh-2	0.22683	23.2906	2.09318	0.0501635	0.21061	NS
rad-50	0.251821	18.4902	2.09026	0.0504529	0.211691	NS
ZK546-14	-0.199899	16.9072	-2.08978	0.0505007	0.211719	NS
sft-4	-0.248512	19.1086	-2.08955	0.0505235	0.211719	NS
pgs-1	0.608703	16.4876	2.08843	0.0507455	0.212515	NS
F52G3.1	-0.173411	17.5022	-2.0867	0.0508083	0.212644	NS
mrpl-47	-0.169424	17.9039	-2.08552	0.0509269	0.213005	NS
stn-1	0.256044	15.8287	2.08338	0.0511422	0.213766	NS
phm-2	-0.163907	17.6961	-2.08281	0.0511991	0.213766	NS
prp-38	-0.144893	18.4014	-2.08275	0.0512056	0.213766	NS
mct-5	0.37631	17.5204	2.08245	0.0512898	0.213982	NS
sodh-1	1.139	17.2714	2.08194	0.0513975	0.214162	NS
mrpl-46	-0.126724	17.0992	-2.08147	0.0513347	0.214034	NS
sago-1	0.28392	18.0487	2.08051	0.0514315	0.214169	NS
F53F8.5	0.198723	18.7638	2.07909	0.0515758	0.214634	NS
T24G10.2	-0.254135	17.7862	-2.07875	0.0516097	0.214641	NS
tam-1	-0.264839	17.6094	-2.0782	0.0516656	0.214738	NS
fat-4	-1.69307	15.9326	-2.07769	0.0518289	0.215055	NS
dpy-22	-0.154741	17.199	-2.07705	0.0517834	0.215055	NS
K07F5.22	-0.378099	16.1028	-2.07716	0.0518392	0.215055	NS
C01B10.9	0.255512	16.9129	2.0758	0.0519101	0.215214	NS
acdh-10	0.271483	22.1464	2.075	0.0519918	0.215418	NS
T22F7.3	-0.173474	15.885	-2.07254	0.0522437	0.216315	NS
rom-5	0.262282	17.3026	2.07182	0.052318	0.216315	NS
hpl-1	0.297379	16.7732	2.07174	0.0523268	0.216315	NS
kin-29	-0.215971	15.7961	-2.07162	0.052339	0.216315	NS
nep-1	-0.220665	19.5531	-2.07061	0.0524432	0.216518	NS
cyp-29a2	0.21187	16.0476	2.0705	0.0524536	0.216518	NS
col-121	-0.448905	16.8809	-2.07011	0.0525906	0.216679	NS
cyk-7	0.240633	16.8446	2.06966	0.0525404	0.216636	NS
acl-6	0.216336	17.6792	2.06959	0.0525475	0.216636	NS
rpl-31	0.283203	24.5891	2.06852	0.0526844	0.21693	NS
wars-2	0.220145	17.3821	2.06737	0.0527775	0.217178	NS
lgx-1	-0.542887	17.08	-2.0649	0.0531461	0.218424	NS
smgl-1	0.134335	18.4509	2.06419	0.0531076	0.218401	NS
C36E6.2	0.940215	15.72	2.06305	0.0533389	0.218727	NS
elpc-3	-0.171808	19.0223	-2.06238	0.0532964	0.218727	NS
R151.2	-0.139672	20.3617	-2.06206	0.0533306	0.218727	NS
C07D10.5	0.257718	18.3806	2.06185	0.0533521	0.218727	NS
prdx-2	0.140592	23.2549	2.06112	0.0534289	0.218906	NS
unc-97	-0.31259	18.853	-2.06073	0.0534957	0.218984	NS
dpff-1.1	-0.205789	17.5496	-2.06031	0.0535141	0.218984	NS
F56G4.6	0.152814	17.8958	2.05911	0.0536396	0.219362	NS
T24B1.1	-0.215737	16.6926	-2.05781	0.053777	0.219755	NS
prx-14	0.641627	17.9762	2.05794	0.0538749	0.219755	NS
gsp-1	-0.250802	19.6554	-2.05715	0.0538457	0.219755	NS
polh-1	0.310167	15.7513	2.05707	0.0538712	0.219755	NS
K07H8.2	-0.188742	16.8945	-2.05633	0.0539329	0.219755	NS
sig-7	-0.163166	17.5132	-2.05631	0.0539347	0.219755	NS
R06C1.4	0.720477	18.2551	2.05601	0.0540787	0.219833	NS
rfc-4	-0.36353	20.8802	-2.05567	0.0540994	0.219833	NS
ulp-1	0.182648	18.0101	2.05513	0.0540597	0.219833	NS
nmat-2	-0.362304	17.1055	-2.05517	0.0540817	0.219833	NS
rpn-8	-0.156771	22.0343	-2.05456	0.05412	0.219833	NS
pan-1	0.316073	17.1386	2.05393	0.0541868	0.21997	NS
daf-16	-0.221725	17.005	-2.05269	0.0543192	0.220372	NS
C06E7.88	-0.659825	18.0515	-2.05297	0.0544009	0.220569	NS
hda-4	-0.211153	16.9037	-2.05107	0.0544912	0.220698	NS
gpb-1	-0.275584	21.1442	-2.05099	0.0544996	0.220698	NS
Y50D7A.3	0.128263	16.6832	2.0503	0.0545729	0.220817	NS
nos-3	-0.215593	18.6858	-2.05007	0.0545983	0.220817	NS
cox-17	0.286262	16.3621	2.04966	0.0546421	0.220817	NS
cisd-1	0.221585	21.3922	2.04947	0.0546623	0.220817	NS
B0395.3	0.411973	18.0535	2.04922	0.0547872	0.221144	NS
nova-1	-0.243959	18.6941	-2.04809	0.05481	0.221144	NS
tag-153	-0.394121	18.1787	-2.04737	0.0549855	0.221717	NS
SRP-2	0.23849	17.6432	2.04559	0.0550782	0.221955	NS
Y61A9LA.1	1.18285	16.1487	2.04551	0.0552004	0.222313	NS
cut-3	-0.728144	19.2037	-2.04517	0.0552372	0.222325	NS
C44B7.7	0.420312	16.7414	2.04465	0.0552714	0.222328	NS
imph-1	0.533313	18.3001	2.04361	0.055405	0.22273	NS
gst-42	0.518881	18.4334	2.0418	0.0556008	0.223246	NS
sec-15	-0.167682	18.1715	-2.04103	0.0555712	0.223246	NS
C14A4.9	-0.510916	16.4186	-2.04048	0.0557441	0.223415	NS
ZK1010.2	0.230393	18.6888	2.03987	0.0556982	0.223415	NS
mec-8	-0.268692	18.5938	-2.03965	0.0557217	0.223415	NS
hmgr-1	0.182252	16.4466	2.03748	0.0559584	0.224058	NS
aars-1	0.20827	15.7645	2.03687	0.0560247	0.224058	NS
R05D3.8	-0.186855	15.8546	-2.03678	0.0560353	0.224058	NS
rpn-12	-0.184847	22.1997	-2.03673	0.0560399	0.224058	NS
gtf-2H5	0.229821	16.5548	2.0341	0.0563282	0.225075	NS
moa-2	3.04717	16.7352	2.03353	0.0565043	0.225499	NS
srpa-72	-0.132965	20.9085	-2.03308	0.0564412	0.22539	NS
K04G7.1	-0.184601	17.7539	-2.03221	0.0565366	0.225499	NS
sdz-8	0.591244	16.9	2.03062	0.0568255	0.226243	NS
C01G10.9	0.31807	17.2175	2.02982	0.0568008	0.226243	NS
istr-1	0.201182	19.5988	2.02965	0.0568191	0.226243	NS
Y45G5AM.5	0.228653	15.8188	2.02911	0.0568794	0.226321	NS
adsl-1	0.181636	20.6119	2.02862	0.0569335	0.226372	NS
cam-1	-0.199161	18.0876	-2.02838	0.0569605	0.226372	NS
plpp-1.2	0.523877	16.9578	2.02797	0.0571202	0.22687	NS
gln-5	-0.396468	21.5456	-2.02745	0.0571778	0.226963	NS
cbn-1	-0.622068	18.057	-2.02622	0.0573152	0.227372	NS
laat-1	0.287105	18.4012	2.02366	0.0574868	0.227916	NS
mdt-21	0.262071	17.3345	2.02277	0.0575864	0.228075	NS
zhit-2	0.372188	15.8636	2.02292	0.0576646	0.228075	NS
epn-1	-0.20414	19.7981	-2.02235	0.0576337	0.228075	NS
F32E10.5	0.210325	16.6305	2.02213	0.0576581	0.228075	NS
F25E5.1	-0.166784	16.844	-2.02098	0.0577871	0.228423	NS
acs-14	0.476013	18.8933	2.02106	0.057893	0.228705	NS
umps-1	-0.154499	19.6793	-2.0184	0.0580782	0.2293	NS
dpy-10.1	-0.53541	17.5899	-2.01851	0.0581802	0.229566	NS
hpo-12	-0.370217	16.9227	-2.01625	0.0583477	0.23009	NS
taf-6.2	-0.122148	17.1506	-2.01569	0.0583849	0.230099	NS
tth-1	0.329773	20.533	2.01489	0.0585634	0.230528	NS
rpn-6.1	-0.179434	21.4022	-2.01442	0.0585289	0.230528	NS
2O16	-0.187685	18.2176	-2.01282	0.0587111	0.230972	NS
dhs-9	0.681318	19.954	2.01238	0.0588762	0.231191	NS
egl-18	-0.246747	17.7147	-2.01128	0.0588867	0.231191	NS
C18D11.3	0.218391	15.904	2.01125	0.058891	0.231191	NS
sin-3	0.143595	18.9374	2.01095	0.058925	0.231191	NS
Y39E4B.10	0.214021	17.79	2.01081	0.0589412	0.231191	NS
imp-1	-0.38349	17.9797	-2.00905	0.0592399	0.231715	NS
C15H9.9	0.323191	19.3668	2.00887	0.0592162	0.231715	NS
sel-10	-0.178341	15.6263	-2.0084	0.0592174	0.231715	NS
prp-9	-0.133599	19.6111	-2.00817	0.0592439	0.231715	NS
F02H6.3	0.254551	16.8543	2.00812	0.0592499	0.231715	NS
Y53F4B.18	0.261637	18.0237	2.00667	0.0594165	0.231989	NS
T05F1.4	0.207834	17.6486	2.00666	0.0594178	0.231989	NS
T02G5.7	0.156391	21.6696	2.00646	0.0594409	0.231989	NS
catp-8	0.134782	19.5333	2.00629	0.0594602	0.231989	NS
ssup-72	-0.259299	16.5811	-2.00563	0.0595367	0.232151	NS
ife-4	-0.222685	17.7037	-2.00459	0.0596569	0.232326	NS
dpf-4	0.152916	19.4196	2.00458	0.0596577	0.232326	NS
dif-1	0.199357	21.1442	2.00433	0.0596867	0.232326	NS
hsp-16.48	1.62914	17.8403	2.00368	0.059877	0.232904	NS
mboa-3	0.257693	15.5199	2.00244	0.0599056	0.232904	NS
ccm-3	0.150912	18.7232	2.00192	0.0599669	0.232982	NS
dpy-7	-0.286922	16.4295	-2.00166	0.0599961	0.232982	NS
ttr-51	0.416292	20.1414	2.00104	0.0601839	0.233437	NS
wago-4	-0.199711	19.2306	-2.00016	0.0601711	0.233437	NS
F10G7.9	-0.124781	15.6934	-1.99792	0.0604335	0.234268	NS
oxy-5	-0.253071	19.5944	-1.99703	0.0605372	0.234533	NS
ZC247.2	-0.25655	15.9412	-1.99654	0.0605951	0.234572	NS
F57C9.4	0.154021	17.8264	1.99634	0.0606182	0.234572	NS
acs-17	0.603805	17.5227	1.99656	0.0607079	0.234781	NS
sel-12	0.217697	17.0703	1.99528	0.0607432	0.234781	NS
Y45G12B.2	-0.127147	18.1696	-1.99497	0.0607788	0.234782	NS
col-165	-0.447994	16.4924	-1.99437	0.060954	0.235322	NS
timm-17B.1	0.302472	15.6451	1.99307	0.0610303	0.235479	NS
igcm-3	-0.531243	17.6737	-1.99127	0.0613318	0.236181	NS
scd-1	-0.238861	17.3982	-1.99053	0.0613035	0.236181	NS
C04F12.1	-0.392459	17.5688	-1.99076	0.0613744	0.236181	NS
clp-7	0.216353	17.5133	1.99003	0.0613635	0.236181	NS
ran-4	0.227172	21.1041	1.9898	0.0613908	0.236181	NS
Y37A1B.7	-0.622269	17.4924	-1.98995	0.0614886	0.236421	NS
sams-4	-0.511471	19.0868	-1.98855	0.0616545	0.236679	NS
Y71F9B.2	0.160969	18.8776	1.9876	0.0616519	0.236679	NS
spg-20	0.254943	17.6462	1.98751	0.0616631	0.236679	NS
dyn-1	-0.231446	20.9406	-1.98679	0.0617491	0.236872	NS
T02H6.11	0.318654	19.3218	1.98585	0.0619107	0.237174	NS
cnep-1	0.240507	16.5718	1.98497	0.0619664	0.237174	NS
bli-4	-0.230277	17.4898	-1.98475	0.061992	0.237174	NS
Y52B11A.10	-0.126304	15.8277	-1.98453	0.0620186	0.237174	NS
ced-7	0.175072	20.9642	1.98417	0.0620614	0.237174	NS
frl-1	-0.130088	18.0754	-1.98391	0.0620935	0.237174	NS
nrd-1	-0.17097	18.4248	-1.9837	0.062118	0.237174	NS
K07C5.6	-0.155044	17.9531	-1.98366	0.0621236	0.237174	NS
F26F2-7	0.309231	16.1333	1.98343	0.0621503	0.237174	NS
mrpl-9	-0.180524	18.8321	-1.98309	0.0621911	0.237193	NS
set-2	-0.174966	16.8538	-1.98186	0.0623391	0.237621	NS
dhs-30	0.225105	19.3324	1.98135	0.0624004	0.237697	NS
rpl-14	-0.131302	23.7299	-1.9811	0.062431	0.237697	NS
rps-12	-0.311987	24.7133	-1.9812	0.0625165	0.237873	NS
rpac-40	-0.170012	19.6395	-1.98012	0.062549	0.237873	NS
coa-7	0.180143	19.291	1.97914	0.0626673	0.238122	NS
let-858	-0.143993	19.9989	-1.97889	0.0626982	0.238122	NS
F25H9.7	-0.241299	16.5874	-1.97869	0.0627223	0.238122	NS
ced-9	-0.302203	17.2049	-1.97777	0.0628337	0.238408	NS
Y48G10A.1	0.242885	19.9946	1.97705	0.0629202	0.238459	NS
C14B1.9	-0.363524	16.7095	-1.97705	0.0629485	0.238459	NS
T19B10.5	-0.283517	16.716	-1.97677	0.0629551	0.238459	NS
skih-2	-0.23278	18.4241	-1.9758	0.0630728	0.238768	NS
acs-19	0.37383	16.2845	1.97187	0.063624	0.240579	NS
tbb-2	-0.23113	23.2942	-1.97135	0.0636154	0.240579	NS
Y48G10A.2	0.429265	17.4665	1.97158	0.0636945	0.240708	NS
C33G3.4	-0.189203	18.9072	-1.96965	0.063824	0.240945	NS
Y39B6A.10	0.25332	19.3312	1.96961	0.0638298	0.240945	NS
algn-3	0.229768	17.1332	1.96898	0.0639071	0.241099	NS
sgk-1	-0.26753	16.199	-1.96786	0.064045	0.241482	NS
ugt-48	-0.296184	16.4103	-1.96716	0.0641313	0.24167	NS
tag-296	-0.213315	18.3174	-1.96582	0.0642969	0.24186	NS
ctl-2	0.637666	18.927	1.96613	0.0643764	0.24186	NS
sptl-2	-0.401864	16.3452	-1.96592	0.0643823	0.24186	NS
Y69A2AR.16	-0.18867	19.5018	-1.9656	0.0643239	0.24186	NS
Y54E10A.6	0.150428	18.8972	1.9654	0.0643489	0.24186	NS
rei-1	0.324063	15.5201	1.965	0.0644939	0.24186	NS
sav-1	0.376823	21.2386	1.9649	0.0645279	0.24186	NS
dph-2	-0.239298	17.1588	-1.9645	0.0644607	0.24186	NS
B0393.5	-0.477094	17.1389	-1.96473	0.064549	0.24186	NS
exoc-7	0.129471	17.82	1.96355	0.0645778	0.24186	NS
pgrn-1	0.283055	16.8596	1.96351	0.0645837	0.24186	NS
sams-5	-0.300046	15.6652	-1.96259	0.0647251	0.242253	NS
rab-19	-0.525595	17.4611	-1.96208	0.064879	0.242418	NS
coq-4	0.146327	17.2679	1.96172	0.0648059	0.242418	NS
C49H3.6	0.177112	16.6835	1.96121	0.0648694	0.242418	NS
W09B6.4	0.174988	17.9298	1.96036	0.0649753	0.242641	NS
inx-11	0.392669	18.0901	1.96009	0.0651117	0.243013	NS
rrc-1	-0.357995	16.5574	-1.95919	0.0651496	0.243017	NS
cytb-5.1	0.484074	18.0554	1.95902	0.0652603	0.243019	NS
F53B1.8	-0.112065	15.6208	-1.9585	0.0652081	0.243019	NS
lsm-6	-0.170281	20.7871	-1.9582	0.0652464	0.243019	NS
R05H5.3	-0.25326	21.2198	-1.95628	0.0654875	0.243728	NS
emb-9	-0.537417	18.7169	-1.9563	0.0656019	0.244017	NS
hhat-1	-0.530176	16.7602	-1.95567	0.0656814	0.244039	NS
ttr-47	0.3105	17.7057	1.95479	0.0656761	0.244039	NS
inx-2	0.331231	19.2293	1.95417	0.0658493	0.244207	NS
ddx-27	-0.184252	17.9001	-1.95365	0.0658184	0.244207	NS
F39C12.1	-0.18069	16.623	-1.95363	0.0658214	0.244207	NS
rps-17	-0.182444	23.8996	-1.95321	0.0658744	0.244207	NS
mam-1	-0.365517	16.4091	-1.9513	0.0661641	0.24504	NS
mlcd-1	0.182767	16.4523	1.95062	0.0662022	0.24504	NS
lgc-22	-0.559878	16.3077	-1.95091	0.0662839	0.24504	NS
F26E4.7	0.320655	15.9119	1.94967	0.0663512	0.24504	NS
etc-1	-0.130478	19.1096	-1.94953	0.0663413	0.24504	NS
csnk-1	-0.172425	19.1588	-1.94939	0.0663587	0.24504	NS
pro-3	-0.177711	17.5135	-1.94919	0.0663838	0.24504	NS
R144.11	0.234354	17.5874	1.949	0.0664084	0.24504	NS
tmed-4	-0.191033	20.1162	-1.94881	0.0664321	0.24504	NS
mvk-1	-0.390442	17.2568	-1.94841	0.0665814	0.245454	NS
vit-4	0.647157	26.6686	1.94739	0.0667318	0.245735	NS
sec-10	-0.139842	18.2303	-1.94652	0.066725	0.245735	NS
acn-1	-0.629598	20.0302	-1.94606	0.0669021	0.246225	NS
Y32H12A.7	0.170276	17.2884	1.94442	0.0669938	0.246426	NS
fem-1	-0.122226	16.1055	-1.94362	0.0670964	0.246666	NS
ppm-1.G	-0.167467	20.4032	-1.94303	0.0671724	0.246808	NS
rgs-5	0.166397	16.0251	1.94273	0.0672112	0.246814	NS
ife-2	-0.225006	18.6632	-1.93808	0.0678116	0.248808	NS
C09D4.4	-0.215076	18.2899	-1.93794	0.0678295	0.248808	NS
pab-2	-0.370026	22.6376	-1.93782	0.0679644	0.249165	NS
ras-1	0.434094	17.3973	1.93714	0.0680531	0.249176	NS
M03B6.3	-0.449836	17.0419	-1.93694	0.0680792	0.249176	NS
ddx-10	-0.182784	17.602	-1.93601	0.0680802	0.249176	NS
tag-225	0.471281	18.0317	1.93598	0.068204	0.249491	NS
unc-52.1	-0.667798	19.1755	-1.93439	0.0684113	0.249996	NS
T26G10.1	-0.224332	17.396	-1.93343	0.0684174	0.249996	NS
madf-1	0.803469	16.4297	1.93289	0.0686078	0.250403	NS
cct-2	-0.163323	22.8641	-1.93187	0.0686219	0.250403	NS
lipt-1	-0.148229	17.3659	-1.93171	0.0686425	0.250403	NS
eat-17	-0.205533	16.9733	-1.93065	0.0687815	0.250772	NS
hex-5	0.420186	18.9011	1.93093	0.0688642	0.250798	NS
pst-1	0.157947	16.1359	1.93021	0.0688394	0.250798	NS
pptr-2	-0.407112	17.538	-1.92936	0.0690579	0.251365	NS
maph-1.2	-0.197461	21.7159	-1.92669	0.0693045	0.252124	NS
mxl-1	0.377571	16.1494	1.92656	0.06942	0.252373	NS
ntl-2	-0.264303	17.5455	-1.92559	0.0694492	0.252373	NS
mog-3	-0.154418	17.8786	-1.92284	0.0698152	0.253441	NS
Y59E9AL.36	-0.222705	16.1236	-1.92273	0.0698288	0.253441	NS
acl-8	-0.200922	17.0327	-1.92252	0.069858	0.253441	NS
C01G6.9	-0.30463	15.9238	-1.92235	0.0699058	0.253476	NS
Y57G11C.9	-0.117857	17.5551	-1.92061	0.0701128	0.253892	NS
ada-2	-0.185108	18.7596	-1.92043	0.0701364	0.253892	NS
arx-6	-0.120723	20.5488	-1.92037	0.0701447	0.253892	NS
Y39A1A.21	-0.182988	17.7609	-1.92015	0.0701739	0.253892	NS
taf-7.1	0.141621	15.8095	1.91861	0.0703803	0.254362	NS
ric-3	-0.25152	16.1188	-1.9186	0.0703809	0.254362	NS
egal-1	-0.269676	16.9517	-1.9171	0.0705824	0.254951	NS
Y54E2A.4	0.1333	18.4685	1.91624	0.0706979	0.255222	NS
gcl-1	0.262344	16.0323	1.91597	0.0707343	0.255222	NS
F33H1.4	-0.184096	20.5731	-1.91552	0.0707947	0.255251	NS
T04G9.4	-0.24137	17.5983	-1.91534	0.0708195	0.255251	NS
slc-25a10	0.49277	18.6298	1.91557	0.0709086	0.255433	NS
uso-1	-0.120245	18.2089	-1.91399	0.0710023	0.255631	NS
Y105E8A.2	-0.132004	17.5931	-1.91228	0.0712335	0.256324	NS
C34C6.3	-0.39415	16.4495	-1.91061	0.0715604	0.257361	NS
efhd-1	0.431359	18.327	1.90997	0.0716675	0.257606	NS
F30H5.3	-0.634932	18.1834	-1.90885	0.0718193	0.257872	NS
C52B9.4	-0.167922	18.3371	-1.90822	0.0717849	0.257872	NS
csc-1	-0.321234	19.8175	-1.90713	0.0720323	0.258496	NS
cdkr-3	-0.132681	19.1141	-1.90588	0.0721057	0.258519	NS
clk-2	0.20466	16.4733	1.9058	0.0721168	0.258519	NS
popl-1	-0.160566	16.8009	-1.90536	0.0721767	0.258594	NS
F15A4.10	0.439777	16.9195	1.90496	0.0723516	0.259081	NS
golg-2	-0.114037	19.2706	-1.90375	0.0723976	0.259105	NS
npp-20	-0.204752	20.2972	-1.9034	0.072446	0.259138	NS
C08B6.8	-0.268239	18.3607	-1.90214	0.0726196	0.259499	NS
rga-2	-0.207127	15.8406	-1.90195	0.0726451	0.259499	NS
Y82E9BR.18	-0.176127	19.1576	-1.90181	0.0726645	0.259499	NS
ncl-1	-0.151571	18.3196	-1.90094	0.0727847	0.259673	NS
prx-3	0.238408	17.6955	1.90071	0.0728162	0.259673	NS
nfs-1	0.165667	19.2851	1.90061	0.0728309	0.259673	NS
F55A12.2	0.271109	17.1229	1.8996	0.0729704	0.259934	NS
hars-1	-0.170642	21.5358	-1.89928	0.0730144	0.259934	NS
pash-1	-0.246285	16.2758	-1.89923	0.0730218	0.259934	NS
gck-1	0.107793	18.8207	1.89858	0.0731122	0.260036	NS
F20C5.6	-0.2039	16.9869	-1.89845	0.0731291	0.260036	NS
sod-2	-0.275076	21.6745	-1.89716	0.0733376	0.260498	NS
sec-61.a	-0.164665	22.9302	-1.89696	0.073336	0.260498	NS
W08G11.3	0.180235	15.6273	1.89663	0.0733826	0.260518	NS
tni-1	-0.728553	19.6429	-1.89616	0.0735688	0.26067	NS
sar-1	-0.241756	21.6915	-1.89576	0.0735039	0.26067	NS
mbk-1	-0.127808	16.4685	-1.89524	0.0735762	0.26067	NS
pros-1	-0.163063	16.1902	-1.89519	0.0735829	0.26067	NS
lec-4	1.08495	16.813	1.89267	0.074057	0.262209	NS
eak-7	0.135836	19.7163	1.88845	0.0745287	0.263673	NS
fre-1	0.204508	18.4087	1.8883	0.07455	0.263673	NS
pud-1.2	0.749717	16.5573	1.88824	0.0746786	0.263705	NS
spin-4	-0.227796	17.8424	-1.88752	0.0746592	0.263705	NS
ubc-26	0.209938	16.5466	1.88751	0.0746606	0.263705	NS
sups-1	-0.23905	15.9199	-1.88561	0.0749298	0.264451	NS
F59B1.2	0.696737	17.2292	1.88555	0.0750601	0.26477	NS
dhs-3	0.705558	17.3893	1.88288	0.0754391	0.265717	NS
NA	0.413829	21.0488	1.88281	0.0754493	0.265717	NS
lin-35	-0.129897	18.6558	-1.88138	0.075532	0.265717	NS
ptps-1	0.358945	16.5876	1.8814	0.075578	0.265717	NS
K02F3.9	0.382435	16.4735	1.88105	0.0756771	0.265717	NS
F13E9.13	0.255081	15.9196	1.88048	0.07566	0.265717	NS
act-2	0.266512	26.1524	1.88051	0.0757299	0.265717	NS
T23B3.1	0.188101	17.1532	1.88035	0.0756794	0.265717	NS
parg-1	-0.265672	17.6957	-1.88025	0.0756924	0.265717	NS
trap-4	-0.176803	22.6793	-1.88015	0.0757074	0.265717	NS
cct-6	-0.171928	22.3754	-1.87957	0.07579	0.265729	NS
F32D8.4	0.165638	16.8285	1.87941	0.0758137	0.265729	NS
C39B5.6	0.150409	16.5173	1.87585	0.0763247	0.267379	NS
F23B12.7	-0.190631	18.2515	-1.87486	0.076467	0.267735	NS
F28B3.10	0.361772	17.0361	1.87444	0.076601	0.267922	NS
rsd-2	0.230804	18.9044	1.87425	0.0765553	0.267903	NS
R07D5.2	-0.574757	17.2463	-1.87429	0.0766714	0.268026	NS
ncx-2.	-0.523884	17.8211	-1.8737	0.0767573	0.268043	NS
ekl-1	0.189591	18.7508	1.87289	0.0767519	0.268043	NS
etr-1	-0.203057	17.2347	-1.8725	0.0768081	0.268079	NS
chs-1	-0.68821	18.4862	-1.87257	0.0769201	0.268196	NS
vpr-1	0.1733	20.2195	1.87171	0.0769224	0.268196	NS
chc-1	-0.158816	22.3129	-1.87122	0.0769947	0.268306	NS
kdin-1	0.203477	16.1624	1.87027	0.0771322	0.268644	NS
npp-6	-0.152688	20.3123	-1.86936	0.0772638	0.26893	NS
F54C4.4	0.232917	15.5691	1.8688	0.0773461	0.26893	NS
gspd-1	0.156624	20.0508	1.86852	0.0773871	0.26893	NS
col-117	-0.602496	15.8549	-1.86828	0.0775438	0.26893	NS
aly-3	-0.196578	20.4229	-1.86802	0.0774603	0.26893	NS
metr-1	-0.208466	17.4986	-1.86795	0.0774703	0.26893	NS
gon-2	0.140013	15.7403	1.8679	0.0774768	0.26893	NS
F37C4.4	-0.139225	16.1138	-1.86749	0.0775371	0.26893	NS
txdc-12.1	-0.403426	19.713	-1.86717	0.0777064	0.26893	NS
T16G12.4	0.520817	17.7879	1.86686	0.0777513	0.26893	NS
pas-1	-0.141435	23.04	-1.86647	0.0776866	0.26893	NS
rpl-2	-0.175421	25.4446	-1.86631	0.0777095	0.26893	NS
R09H10.5	-0.502656	16.3947	-1.86644	0.0778123	0.26893	NS
hst-2	0.262481	16.7071	1.86617	0.0777297	0.26893	NS
fasn-1	-0.339032	21.6991	-1.86629	0.0778236	0.26893	NS
lpr-3	-0.417409	20.3562	-1.86521	0.0779931	0.269375	NS
pdha-1	-0.133654	21.0898	-1.86212	0.0783248	0.27038	NS
jmjd-1.2	-0.187296	16.6544	-1.86157	0.0784064	0.270521	NS
acl-11	0.280036	17.4395	1.86098	0.0784931	0.270679	NS
rpt-4	-0.162115	21.7967	-1.8599	0.078653	0.271089	NS
pnc-1	0.183069	17.5445	1.85916	0.0787621	0.271324	NS
lem-4	0.1563	17.1158	1.85881	0.0788136	0.27136	NS
M142.5	-0.132068	21.0929	-1.85802	0.0789317	0.271492	NS
R166.2	0.158673	19.2987	1.85779	0.0789657	0.271492	NS
spon-1	-0.291663	17.7519	-1.85773	0.0789751	0.271492	NS
nubp-1	0.176277	19.7395	1.85744	0.0790172	0.271496	NS
K10D3.4	-0.531001	19.4601	-1.8563	0.0793092	0.272358	NS
F58H1.8	0.329751	16.454	1.85468	0.0794574	0.272584	NS
pry-1	-0.181165	15.6476	-1.85455	0.0794483	0.272584	NS
dpff-1	0.418111	15.7838	1.85438	0.0795959	0.272918	NS
sinh-1	0.177423	17.2854	1.85315	0.0796569	0.272986	NS
hum-4	-0.4565	17.9238	-1.85322	0.0797689	0.273087	NS
pfd-3	-0.180766	19.4387	-1.85259	0.0797403	0.273087	NS
ppm-2	0.194387	18.9218	1.85177	0.0798641	0.273144	NS
vha-4	-0.125446	16.221	-1.85174	0.0798681	0.273144	NS
F19C6.2	-0.156959	17.0787	-1.8513	0.0799341	0.273229	NS
alh-9	-0.237628	21.4193	-1.85091	0.0799921	0.273286	NS
vps-34	-0.134847	17.5439	-1.85022	0.0800957	0.273302	NS
ZK909.3	0.718028	16.8941	1.85041	0.0801911	0.273302	NS
ekl-6	-0.121945	19.0163	-1.84986	0.0801509	0.273302	NS
stip-1	-0.192426	16.4853	-1.84975	0.0801667	0.273302	NS
grp-1	-0.192821	18.4771	-1.84943	0.0802148	0.273302	NS
K02G10.5	-0.168696	15.7031	-1.84923	0.0802445	0.273302	NS
ppm-1.A	-0.192856	20.1864	-1.84794	0.0804397	0.273826	NS
bas-1	0.339567	15.7283	1.84703	0.080681	0.273993	NS
sftd-3	0.317968	15.7209	1.847	0.0806814	0.273993	NS
rpc-25	0.224572	17.2401	1.84661	0.0806411	0.273993	NS
pph-4.1	-0.27103	17.5482	-1.84628	0.080691	0.273993	NS
K07C11-7	0.261632	15.8377	1.84616	0.0807088	0.273993	NS
W02H5.2	0.148229	17.1144	1.84597	0.0807371	0.273993	NS
epg-3	0.14725	20.5271	1.84512	0.0808665	0.274292	NS
sax-1	-0.179167	17.2352	-1.84338	0.0811295	0.274965	NS
luc-7l3	-0.132039	17.0367	-1.84324	0.0811515	0.274965	NS
K08F4.3	0.42536	17.5201	1.84338	0.0812538	0.275042	NS
ipla-1	0.157483	17.3727	1.84299	0.0811897	0.274965	NS
Y53C12B.1	-0.207784	18.1236	-1.84178	0.0813741	0.275308	NS
C31E10.5	-0.130842	17.2893	-1.8415	0.081416	0.275309	NS
pmt-1	-0.478659	19.053	-1.84171	0.0815076	0.275443	NS
psme-3	0.252845	19.1959	1.84051	0.0815671	0.275443	NS
ubc-25	-0.19625	17.2832	-1.84043	0.0815803	0.275443	NS
nra-4	-0.101298	21.5683	-1.84005	0.0816381	0.275497	NS
dap-3	0.185674	19.1004	1.83946	0.0817277	0.275659	NS
Y38C1AA.12	0.425754	15.9295	1.8389	0.0819373	0.276201	NS
dnj-7	-0.245056	19.6602	-1.83778	0.0819859	0.276201	NS
slc-17.7	-0.158347	16.1385	-1.83759	0.0820136	0.276201	NS
szy-5	0.735449	16.5324	1.83739	0.0821683	0.276582	NS
K08B12.1	-0.728276	18.3634	-1.8364	0.0823202	0.276952	NS
mre-11	0.242737	18.9083	1.83508	0.0823997	0.277079	NS
rab-18	-0.165341	20.6356	-1.8312	0.0829998	0.278955	NS
F39H11.1	0.282706	16.7846	1.83075	0.0830698	0.279049	NS
F31D4.5	-0.389146	17.4783	-1.83044	0.0832289	0.279442	NS
glf-1	-0.624338	19.1478	-1.82889	0.0834827	0.28001	NS
acp-6	0.275464	17.1528	1.82834	0.0834446	0.28001	NS
Y50D4C.6	1.40213	16.4674	1.82782	0.0836498	0.280428	NS
pqn-52	-0.343532	17.2715	-1.8272	0.0836968	0.280444	NS
Y71H2AM.3	0.209719	16.6609	1.82571	0.0838551	0.280832	NS
crn-5	-0.170985	17.3203	-1.82508	0.0839532	0.281018	NS
F33H1.3	-0.151536	18.9491	-1.82407	0.0841129	0.28141	NS
R05D3-10	0.406869	17.753	1.82424	0.084209	0.28159	NS
ttr-5	0.576703	17.7864	1.82364	0.084304	0.281683	NS
C17H12.2	-0.154294	17.2436	-1.82273	0.0843219	0.281683	NS
Y48E1C.4	0.205761	17.2247	1.82143	0.0845272	0.282226	NS
W05B5.1	-0.427599	17.1145	-1.82101	0.084717	0.282489	NS
hum-6	-0.298396	16.8734	-1.82045	0.0846823	0.282489	NS
col-76	-0.364173	17.3343	-1.82025	0.0848164	0.282489	NS
gln-3	0.409867	20.8506	1.82026	0.0848356	0.282489	NS
mrps-18a	-0.162213	17.6843	-1.8198	0.084785	0.282489	NS
C50E3.12	0.374288	17.6007	1.8199	0.0848766	0.282489	NS
syx-5	-0.11928	17.8621	-1.8189	0.0849266	0.282489	NS
C50D2.1	-0.283044	16.0172	-1.81877	0.0849473	0.282489	NS
tads-1	-0.17504	17.351	-1.81836	0.0850124	0.282564	NS
spl-1	0.185128	18.3291	1.81718	0.0851998	0.282882	NS
psmd-9	0.204811	17.9782	1.81715	0.0852034	0.282882	NS
snpc-3.4	-0.163405	17.862	-1.81674	0.0852687	0.282882	NS
cids-1	-0.153219	17.9501	-1.81644	0.0853172	0.282882	NS
btbd-10	-0.191398	16.8945	-1.81618	0.0853583	0.282882	NS
imb-3	-0.189561	22.0255	-1.81597	0.085392	0.282882	NS
C24F3.2	0.159053	15.867	1.81587	0.0854072	0.282882	NS
[truncated: 4,622 more rows]

## Sheet: isp-1 vs WT
Corrected Gene-ID	logFC	AveExpr	t	P.Value	adj.P.Val	Sig
hsp-6	1.10972	23.9859	13.2821	5.46761e-11	3.6201e-07	FDR
R08F11.1	1.62587	16.3371	11.2984	8.23883e-10	2.72746e-06	FDR
cyp-13B1	3.06935	17.0817	9.50786	1.421e-08	2.99961e-05	FDR
K11H12.8	0.971386	20.8525	9.31906	1.81218e-08	2.99961e-05	FDR
rips-1	2.99035	18.9446	8.73548	5.22497e-08	5.28791e-05	FDR
C34C12.8	0.740298	20.5153	8.60286	6.19399e-08	5.28791e-05	FDR
aldo-1	3.4454	20.5872	8.63341	6.24013e-08	5.28791e-05	FDR
lonp-1	0.596935	20.5004	8.53543	6.97678e-08	5.28791e-05	FDR
F56C11.3	0.936119	16.8021	8.51858	7.18792e-08	5.28791e-05	FDR
cht-1	1.09215	21.0844	8.32997	1.0062e-07	6.66205e-05	FDR
aco-2	0.702797	23.5535	8.1655	1.35423e-07	6.92554e-05	FDR
nuo-1	-1.37828	20.4615	-8.18943	1.35759e-07	6.92554e-05	FDR
qdpr-1	1.09973	18.1527	8.16324	1.3598e-07	6.92554e-05	FDR
spg-7	0.671587	20.787	7.86134	2.36768e-07	0.000111974	FDR
T23G7.3	-0.449591	15.7637	-7.30411	6.8029e-07	0.00030028	FDR
ppgn-1	0.46677	18.3049	7.11298	9.86498e-07	0.000397365	FDR
ZK550.6	1.26625	18.7587	7.08892	1.07289e-06	0.000397365	FDR
glrx-5	0.536541	20.5227	7.06666	1.08029e-06	0.000397365	FDR
dgat-2	1.97252	16.5063	7.01263	1.25473e-06	0.0004168	FDR
Y43F8B.2	0.884988	17.0068	6.9889	1.25902e-06	0.0004168	FDR
dhs-19	1.06242	18.9917	6.94781	1.37945e-06	0.000434921	FDR
C16H3.3	-0.924365	17.4464	-6.87359	1.58231e-06	0.000476204	FDR
ZC506.1	-0.48778	16.7736	-6.82842	1.73136e-06	0.000498405	FDR
T20B3.1	1.30151	17.9043	6.74763	2.10571e-06	0.000580914	FDR
vpat-1	0.794932	16.4261	6.61061	2.68277e-06	0.000671581	FDR
C37A5.7	1.1176	16.5463	6.60174	2.73139e-06	0.000671581	FDR
Y49F6B.2	-0.600817	17.3008	-6.58012	2.85381e-06	0.000671581	FDR
spp-10	0.985509	20.7865	6.57335	2.91985e-06	0.000671581	FDR
acer-1	0.647304	22.7274	6.56521	2.94153e-06	0.000671581	FDR
ctsa-1.1	0.750343	22.3789	6.52532	3.19015e-06	0.000681106	FDR
far-3	3.26308	18.6959	6.53466	3.25178e-06	0.000681106	FDR
emb-8	0.473942	20.0325	6.50568	3.32039e-06	0.000681106	FDR
ndx-2	0.856681	15.7267	6.49483	3.39473e-06	0.000681106	FDR
Y47G6A.22	0.882052	20.063	6.42279	3.9337e-06	0.000745633	FDR
cht-4	1.0247	16.7084	6.42181	3.94157e-06	0.000745633	FDR
ldh-1	1.52196	22.8525	6.42075	4.09876e-06	0.000750393	FDR
gfm-1	0.482097	19.606	6.3854	4.24753e-06	0.000750393	FDR
F19C6.5	0.79402	16.1886	6.37866	4.30674e-06	0.000750393	FDR
K07E3.1	-0.412913	16.8098	-6.30327	5.03077e-06	0.00082674	FDR
Y106G6D.5	0.464617	16.9072	6.29849	5.08065e-06	0.00082674	FDR
rps-6	-0.333955	24.8649	-6.28742	5.19834e-06	0.00082674	FDR
dhs-18	1.11136	17.9231	6.29353	5.24439e-06	0.00082674	FDR
pno-1	-0.5822	21.065	-6.26296	5.46824e-06	0.000841981	FDR
ZK673.2	0.830538	19.9055	6.24225	5.70808e-06	0.000842077	FDR
nft-1	0.557013	17.511	6.24097	5.72323e-06	0.000842077	FDR
C17C3.1	1.52555	19.6113	6.20984	6.32055e-06	0.000904976	FDR
ttr-25	1.31379	18.9547	6.18388	6.66923e-06	0.000904976	FDR
T07D3.9	0.389105	18.6803	6.16864	6.65188e-06	0.000904976	FDR
Y51H1A.3	-0.84735	17.7709	-6.15528	6.83974e-06	0.000904976	FDR
C50D2.9	0.454832	18.6842	6.14039	7.05564e-06	0.000904976	FDR
W05H9.1	1.77339	19.5621	6.14712	7.19748e-06	0.000904976	FDR
ttr-24	1.25408	19.8426	6.13954	7.31165e-06	0.000904976	FDR
mdt-15	-0.329383	17.9692	-6.12197	7.3323e-06	0.000904976	FDR
cest-25	1.15364	18.2348	6.11953	7.58128e-06	0.000904976	FDR
clpf-1	0.489113	19.1654	6.10666	7.57067e-06	0.000904976	FDR
ZK185.5	0.965602	15.9678	6.10376	7.65423e-06	0.000904976	FDR
sna-2	-0.368465	19.2112	-6.08055	7.99596e-06	0.000919583	FDR
ech-8	1.63959	16.9955	6.09294	8.05556e-06	0.000919583	FDR
cyn-13	-0.425464	17.5998	-6.02132	9.05437e-06	0.00101608	FDR
M01F1.4	0.70244	19.2862	6.00344	9.4014e-06	0.00102666	FDR
C34B2.8	-0.869689	18.1416	-6.00055	9.45876e-06	0.00102666	FDR
ipgm-1	0.650912	21.4718	5.99152	9.64032e-06	0.00102949	FDR
Y54G11A.7	0.7122	16.2241	5.97637	9.95316e-06	0.00104147	FDR
Y61A9LA.10	-0.625761	18.6823	-5.97097	1.00671e-05	0.00104147	FDR
acox-3	1.39805	18.0928	5.92287	1.15005e-05	0.00115371	FDR
Y45F3A.9	0.644984	18.1617	5.90908	1.14733e-05	0.00115371	FDR
dao-5	-0.678323	19.1805	-5.89322	1.18651e-05	0.00117252	FDR
Y73C8B.3	1.05395	16.9542	5.85823	1.28727e-05	0.00125338	FDR
Y94H6A.8	-1.09127	21.1248	-5.85313	1.32849e-05	0.00125541	FDR
pcs-1	0.675228	15.8453	5.84053	1.32685e-05	0.00125541	FDR
nlp-28	1.68507	19.2626	5.84818	1.34624e-05	0.00125541	FDR
zfp-3	-0.506083	17.2057	-5.80608	1.42775e-05	0.0013098	FDR
trxr-2	0.452731	16.6891	5.80072	1.44412e-05	0.0013098	FDR
Y75B8A.7	-0.566369	17.4642	-5.7871	1.48666e-05	0.00133016	FDR
F58A6.1	2.49301	17.5708	5.77149	1.5837e-05	0.00139809	FDR
maoc-1	1.57151	20.1207	5.76045	1.62125e-05	0.00141241	FDR
W10C8.5	1.04851	15.6977	5.74238	1.67681e-05	0.00144184	FDR
pcp-5	0.791678	19.6823	5.70716	1.76353e-05	0.00149696	FDR
F54D5.7	0.499832	20.2035	5.6773	1.88007e-05	0.00156907	FDR
rnp-3	-0.420154	20.9697	-5.67339	1.89587e-05	0.00156907	FDR
fum-1	0.434012	21.9802	5.60523	2.19497e-05	0.00177945	FDR
mthf-1	-1.22869	18.3881	-5.60527	2.25757e-05	0.00177945	FDR
K02B12.7	-0.360443	18.1305	-5.59386	2.2494e-05	0.00177945	FDR
tufm-1	0.518701	22.472	5.59318	2.25271e-05	0.00177945	FDR
acox-1.1	1.93637	17.6891	5.5987	2.2896e-05	0.00178346	FDR
Y71H2B.4	1.57234	17.3971	5.5918	2.32369e-05	0.00178897	FDR
W02H5.2	0.447369	17.1144	5.57132	2.36139e-05	0.0017971	FDR
cyp-25a3	0.899395	15.8783	5.53748	2.55697e-05	0.00192383	FDR
semo-1	0.880341	17.5064	5.52764	2.59504e-05	0.00193053	FDR
dif-1	0.548481	21.1442	5.51443	2.67025e-05	0.00195509	FDR
Y32F6A.5	0.691648	19.7259	5.51152	2.68711e-05	0.00195509	FDR
ZK370.4	0.509574	16.9785	5.49294	2.7974e-05	0.00201322	FDR
C24H12.4	-0.524184	17.5925	-5.48762	2.82984e-05	0.00201466	FDR
haf-3	0.645129	19.2547	5.48104	2.87049e-05	0.00202186	FDR
dhrs-4	2.21259	17.6731	5.46753	3.03597e-05	0.00211591	FDR
larp-1	-0.376231	20.4771	-5.43653	3.1615e-05	0.00216197	FDR
ckb-2	-0.827711	17.2932	-5.43568	3.16737e-05	0.00216197	FDR
sqd-1	-0.566612	19.0667	-5.41136	3.33931e-05	0.00224021	FDR
srf-3	-0.548705	17.2806	-5.40994	3.34965e-05	0.00224021	FDR
ctl-1	1.37307	21.1818	5.41456	3.40433e-05	0.00225401	FDR
lys-1	1.74868	19.1945	5.40996	3.43837e-05	0.00225401	FDR
acdh-11	0.536496	19.4138	5.37517	3.61309e-05	0.00234532	FDR
B0511.6	-0.604479	18.0238	-5.34332	3.87301e-05	0.00246272	FDR
daf-22	1.66283	19.8136	5.35121	3.90554e-05	0.00246272	FDR
daf-4	-0.328219	16.8918	-5.34072	3.89502e-05	0.00246272	FDR
C15C6.1	-1.59773	17.013	-5.33472	4.04796e-05	0.00249692	FDR
plp-1	0.286751	22.8718	5.32449	4.03556e-05	0.00249692	FDR
reps-1	-0.436072	17.4008	-5.32027	4.07292e-05	0.00249692	FDR
pho-14	0.760841	20.1545	5.29288	4.32962e-05	0.00258295	FDR
paqr-1	0.626035	16.9435	5.29085	4.34358e-05	0.00258295	FDR
Y39B6A.33	-0.448475	16.3889	-5.2897	4.35448e-05	0.00258295	FDR
T23D8.3	-0.318028	16.0649	-5.28815	4.36929e-05	0.00258295	FDR
Y73F4A.1	0.850712	18.5095	5.25679	4.71288e-05	0.00276141	FDR
kin-10	-0.345315	19.7194	-5.24046	4.85054e-05	0.00281714	FDR
F37H8.5	0.860174	21.405	5.23584	4.99841e-05	0.00285777	FDR
acds-10	1.50447	18.142	5.23187	5.06478e-05	0.00285777	FDR
sdz-8	1.52279	16.9	5.23002	5.08528e-05	0.00285777	FDR
gphr-1	0.503267	16.6176	5.2166	5.11127e-05	0.00285777	FDR
Y71F9AL.9	-0.4535	21.9662	-5.21438	5.1363e-05	0.00285777	FDR
acp-5	0.788377	15.8958	5.20662	5.22456e-05	0.00287123	FDR
fbxa-153	0.727137	17.0356	5.20397	5.25506e-05	0.00287123	FDR
Y69A2AR.3	-0.776001	17.8264	-5.2009	5.2906e-05	0.00287123	FDR
unc-76	-0.368642	16.6087	-5.19218	5.39298e-05	0.002885	FDR
tin-44	0.354267	18.979	5.19133	5.40312e-05	0.002885	FDR
fubl-1	-0.42316	19.5351	-5.17648	5.58249e-05	0.00295693	FDR
puf-12	-0.690469	17.908	-5.16705	5.69942e-05	0.00298261	FDR
Y48A6B.9	1.7341	17.0188	5.17257	5.76611e-05	0.00298261	FDR
Y54E10BR.4	-0.52786	21.3983	-5.16317	5.74838e-05	0.00298261	FDR
dld-1	0.427651	20.4812	5.15408	5.86463e-05	0.00301005	FDR
W03G11.3	1.22732	16.595	5.13756	6.22613e-05	0.00313547	FDR
fcp-1	0.287048	19.7325	5.12217	6.29187e-05	0.00313547	FDR
B0495.5	0.353471	18.1049	5.12207	6.29319e-05	0.00313547	FDR
Y53F4B-39.1	0.823122	17.8157	5.12324	6.29841e-05	0.00313547	FDR
flp-1	0.60974	18.0265	5.07237	7.02296e-05	0.00344002	FDR
C16C10.8	-0.588165	17.2347	-5.07197	7.02915e-05	0.00344002	FDR
asns-2	2.57359	19.3853	5.07829	7.09186e-05	0.00344002	FDR
ZK353.9	0.417816	19.4343	5.06629	7.11799e-05	0.00344002	FDR
tag-307	0.400811	16.9792	5.04929	7.39069e-05	0.00354593	FDR
kpc-1	-0.955182	16.4736	-5.04404	7.54627e-05	0.00359452	FDR
Y66H1A.4	-0.616804	17.8665	-5.02385	7.81873e-05	0.0036977	FDR
ntl-4	-0.432851	18.0841	-5.00298	8.18884e-05	0.00384527	FDR
mmcm-1	0.340288	20.3055	4.98172	8.58415e-05	0.00396822	FDR
F55F8.2	-0.547839	17.8662	-4.98167	8.58512e-05	0.00396822	FDR
pam-1.1	0.422429	16.0423	4.97929	8.63046e-05	0.00396822	FDR
irs-2	0.421918	21.4815	4.97354	8.74131e-05	0.00399146	FDR
pyk-2	1.16607	17.1388	4.975	8.90527e-05	0.00403848	FDR
top-1	-0.39321	19.6643	-4.95072	9.19556e-05	0.00414175	FDR
nduf-6	-1.05221	17.4034	-4.95582	9.26455e-05	0.00414463	FDR
lonp-2	1.19072	16.642	4.94708	9.47216e-05	0.00420907	FDR
pcf-11	-0.375686	18.9921	-4.9313	9.60117e-05	0.00423795	FDR
ubc-3	-0.641814	17.9889	-4.92019	9.84114e-05	0.00431511	FDR
T10B5.3	-0.702743	18.3593	-4.91539	9.94682e-05	0.00433276	FDR
fbxc-52	-0.402556	18.26	-4.89535	0.000104004	0.00447395	FDR
lpd-7	-0.60194	18.3327	-4.89511	0.000104061	0.00447395	FDR
fbxa-65	1.41408	15.9749	4.89733	0.000105752	0.0045041	FDR
prx-12	0.967097	17.6566	4.89394	0.000106194	0.0045041	FDR
cest-6	-0.473251	16.4384	-4.88342	0.000106803	0.0045041	FDR
hsp-3	-0.493192	23.3657	-4.87247	0.000109441	0.00458612	FDR
F53F4.11	-0.63931	19.0586	-4.85204	0.00011454	0.00476962	FDR
R04B3.2	0.65633	18.8732	4.84364	0.000116704	0.00482937	FDR
Y54E10A.10	-0.565968	18.0116	-4.8021	0.000128044	0.00519097	FDR
fre-1	0.520041	18.4087	4.80173	0.00012815	0.00519097	FDR
adss-1	0.539692	21.2059	4.80115	0.000128316	0.00519097	FDR
Y39A3CL.4	0.431683	19.8626	4.80023	0.000128579	0.00519097	FDR
B0272.4	1.90762	17.3817	4.80541	0.000129691	0.00520416	FDR
dhs-6	0.574715	21.0808	4.78924	0.000131777	0.00521208	FDR
acs-7	1.31592	17.309	4.79397	0.000133034	0.00521208	FDR
alh-7	0.560281	19.6479	4.78651	0.000132583	0.00521208	FDR
Y37E3.17	0.446473	21.8358	4.78497	0.000133037	0.00521208	FDR
har-1	1.33151	19.2953	4.78127	0.000136847	0.0053298	FDR
plpp-1.2	1.23294	16.9578	4.7728	0.000139451	0.00539946	FDR
mif-1	1.1601	17.4768	4.76473	0.000141981	0.0054035	FDR
Y39B6A.3	0.42132	17.0714	4.75645	0.0001418	0.0054035	FDR
let-504	-0.328504	16.7673	-4.75581	0.000142004	0.0054035	FDR
perm-3	-0.367955	18.0421	-4.73038	0.000150319	0.00567769	FDR
Y87G2A.2	1.21044	16.4878	4.73688	0.000151072	0.00567769	FDR
nduf-11	-0.674342	18.2178	-4.72606	0.000151782	0.00567769	FDR
ngp-1	-0.754724	18.8028	-4.71485	0.000156686	0.00582818	FDR
dhs-9	1.59307	19.954	4.70539	0.000162063	0.00599453	FDR
fusm-2	0.424187	17.5486	4.69052	0.000164363	0.00603355	FDR
nog-1	-0.797298	19.043	-4.69383	0.00016571	0.00603355	FDR
lars-2	0.478066	18.3455	4.6865	0.000165852	0.00603355	FDR
F56B3.11	-0.344969	19.2339	-4.67059	0.000171877	0.00621857	FDR
F53F4.10	-0.697093	19.5442	-4.66253	0.000175793	0.00632569	FDR
D2030.2	0.443444	19.8808	4.65293	0.000178826	0.00639228	FDR
sups-1	-0.589643	15.9199	-4.65106	0.000179575	0.00639228	FDR
hxk-1	0.867298	16.989	4.61878	0.000194544	0.00688811	FDR
Y47G6A.18	-0.397565	19.103	-4.60847	0.000197603	0.0069145	FDR
nol-6	-0.423876	17.9247	-4.60839	0.000197638	0.0069145	FDR
gcst-1	0.513988	19.9221	4.60558	0.000198893	0.0069145	FDR
T20B12.3	-0.317633	15.9333	-4.6043	0.000199467	0.0069145	FDR
rbm-34	-0.462957	18.0511	-4.5981	0.000202265	0.00697497	FDR
marb-1	0.715253	19.0778	4.5893	0.000207195	0.00710133	FDR
erp-44.1	0.368071	21.2424	4.58551	0.000208074	0.00710133	FDR
cox-19	0.833019	17.42	4.58286	0.000210961	0.00715599	FDR
C24A3.4	0.769937	16.3563	4.57765	0.000211837	0.00715599	FDR
pmp-2	1.11192	17.729	4.56466	0.00022201	0.00737775	FDR
ddx-10	-0.430141	17.602	-4.55597	0.000222373	0.00737775	FDR
Y48A5A.3	0.296777	17.1948	4.5558	0.00022246	0.00737775	FDR
Y47G6A.21	0.581529	19.2767	4.555	0.000222859	0.00737775	FDR
toe-1	-0.446848	18.3085	-4.5464	0.000227216	0.00748457	FDR
bus-5	-1.78305	17.8388	-4.55131	0.000228755	0.00749794	FDR
DC2.5	1.06567	16.8758	4.54493	0.000232052	0.00756855	FDR
F59B1.8	1.12349	16.7124	4.53495	0.000237303	0.00770188	FDR
lpd-5	-1.07154	18.5144	-4.53083	0.000239509	0.00773557	FDR
Y22D7AL.10	0.446763	23.9849	4.51932	0.000241505	0.00776214	FDR
F47B7.2	-0.482259	18.098	-4.51491	0.000243917	0.00780181	FDR
B0395.3	0.907753	18.0535	4.5153	0.000247435	0.0078763	FDR
alkb-7	0.486663	16.4445	4.50542	0.00024919	0.0078942	FDR
C48B6.2	-0.516011	17.5211	-4.50254	0.000250813	0.00790778	FDR
tsfm-1	0.497574	18.8819	4.49621	0.000254418	0.00795779	FDR
Y52B11A.10	-0.286116	15.8277	-4.49554	0.000254803	0.00795779	FDR
ZK1098.11	0.384664	18.7523	4.49116	0.000257333	0.00799907	FDR
elo-6	2.72867	16.9435	4.48588	0.000264936	0.00815879	FDR
pro-3	-0.408309	17.5135	-4.47847	0.000264802	0.00815879	FDR
sek-3	0.45954	16.202	4.45447	0.000279539	0.00855767	FDR
ttr-37	0.757198	16.7325	4.45068	0.000281939	0.00855767	FDR
nol-10	-0.446612	17.2586	-4.44796	0.000283676	0.00855767	FDR
ubh-1	0.537831	17.6863	4.44793	0.000283695	0.00855767	FDR
acdh-12	0.36106	23.4993	4.4469	0.000284351	0.00855767	FDR
W01A11.1	0.300033	20.0479	4.44188	0.000287594	0.00859836	FDR
Y48A6B.3	-0.477031	20.0875	-4.44079	0.0002883	0.00859836	FDR
Y37D8A.19	1.19714	16.7547	4.44003	0.000293692	0.00865561	FDR
oatr-1	0.579173	21.1329	4.43377	0.000292911	0.00865561	FDR
C25H3.3	0.558772	17.1626	4.42981	0.00029554	0.00865561	FDR
Y25C1A.13	1.0672	20.2405	4.43563	0.000296611	0.00865561	FDR
F10E7.6	0.429137	17.7436	4.42771	0.000296944	0.00865561	FDR
rpl-3	-0.305096	24.1223	-4.42604	0.000298064	0.00865561	FDR
F33H2.6	0.604368	19.0333	4.40992	0.000309115	0.00893734	FDR
H06I04.3	-0.513757	18.3796	-4.39754	0.000317886	0.00915098	FDR
dhs-28	1.32765	20.7898	4.4017	0.000320135	0.00917581	FDR
Y41D4B.6	-1.15488	18.5035	-4.38989	0.000328764	0.00938254	FDR
F48E8.3	0.386406	21.3143	4.37658	0.000333307	0.00945102	FDR
ecps-1	-0.326236	18.8114	-4.37564	0.000334019	0.00945102	FDR
josd-1	0.409075	16.9342	4.36726	0.000340403	0.00956512	FDR
imp-3	0.439458	17.5375	4.36657	0.000340941	0.00956512	FDR
cpt-2	0.539029	20.5573	4.36275	0.000343895	0.00957938	FDR
fib-1	-0.486907	21.0735	-4.36217	0.000344343	0.00957938	FDR
T21H3.1	0.755799	17.0198	4.35768	0.000348678	0.00958672	FDR
nprt-1	0.512784	19.518	4.35671	0.000348622	0.00958672	FDR
glod-4	0.516403	20.3874	4.3563	0.00034895	0.00958672	FDR
C36B7.6	-0.368171	18.3656	-4.35238	0.000352054	0.00963201	FDR
lbp-3	0.622276	19.2211	4.34791	0.000355632	0.00968988	FDR
ZK632.9	0.556358	20.5403	4.34195	0.000360462	0.00974236	FDR
F58B3.6	0.346195	17.8977	4.34025	0.000361848	0.00974236	FDR
rpl-13	-0.270568	25.0706	-4.33943	0.00036252	0.00974236	FDR
ugt-61	0.709611	16.5967	4.3383	0.000363444	0.00974236	FDR
hrg-7	1.53576	16.1719	4.33906	0.000368642	0.0098185	FDR
pps-1	-0.550115	17.188	-4.3313	0.00036925	0.0098185	FDR
prx-6	0.596462	18.1101	4.32608	0.000373638	0.00989543	FDR
F31D4.2	-0.395782	16.8137	-4.32092	0.000378029	0.00997184	FDR
dhs-11	0.491286	20.5666	4.31179	0.000385918	0.0101395	FDR
smu-2	-0.244954	17.9913	-4.29848	0.000397721	0.0104083	FDR
hoe-1	0.376624	18.0682	4.29297	0.000402712	0.0104975	FDR
maa-1	0.589823	16.1029	4.28677	0.000408405	0.0106041	FDR
F07E5.5	-0.415115	16.2164	-4.28093	0.000413843	0.0107033	FDR
acs-14	1.00833	18.8933	4.28118	0.000420027	0.0107791	FDR
ddx-52	-0.28402	17.3067	-4.27459	0.000419832	0.0107791	FDR
ife-2	-0.495412	18.6632	-4.26722	0.000426895	0.010913	FDR
rmd-3	1.24882	16.1404	4.26232	0.00043829	0.0111298	FDR
F30A10.2	-1.16629	17.1653	-4.26126	0.000439343	0.0111298	FDR
phb-2	0.337167	22.7722	4.25274	0.000441129	0.0111298	FDR
mtcu-1	0.378669	15.8111	4.25177	0.0004421	0.0111298	FDR
K04C2.2	-0.53058	18.572	-4.24718	0.000446726	0.0111859	FDR
crt-1	-0.360264	24.174	-4.24621	0.000447708	0.0111859	FDR
mrps-14	-0.388795	19.572	-4.23433	0.000459928	0.0114219	FDR
rsp-7	-0.303254	19.026	-4.23368	0.000460602	0.0114219	FDR
K07C5.2	0.590005	18.9648	4.23153	0.000462852	0.0114262	FDR
Y54G11A.9	0.480082	17.0204	4.23022	0.000464227	0.0114262	FDR
rbd-1	-0.38451	17.8922	-4.2223	0.000472633	0.01159	FDR
Y46E12BL.2	-0.455674	18.4744	-4.21956	0.000475582	0.0116193	FDR
F33D4.6	-0.991503	19.8618	-4.2186	0.00048375	0.0117754	FDR
C46C2.2	0.617734	18.9042	4.20739	0.00048898	0.0118522	FDR
mrps-5	-0.311032	19.7296	-4.20542	0.000491069	0.0118522	FDR
nst-1	-0.444554	18.5254	-4.20434	0.000492276	0.0118522	FDR
alh-6	0.607425	20.4124	4.20043	0.000497732	0.0119402	FDR
Y39G10AR.11	-0.351042	17.9523	-4.19745	0.000500025	0.0119519	FDR
nra-2	-0.220043	20.0802	-4.19476	0.000503085	0.0119817	FDR
F55F8.3	-0.306055	17.6038	-4.19065	0.000507792	0.0120494	FDR
W09C5.1	-0.682272	18.3858	-4.19025	0.000510378	0.0120494	FDR
R53.5	0.605024	19.9754	4.18799	0.000511386	0.0120494	FDR
D1014.5	-0.838383	16.176	-4.1843	0.000521516	0.0121805	FDR
letm-1	0.331988	18.9384	4.17848	0.000522011	0.0121805	FDR
tufm-2	0.457338	19.1789	4.17595	0.000525016	0.0121805	FDR
acl-8	-0.436341	17.0327	-4.17512	0.000526	0.0121805	FDR
ech-4	0.420446	20.5052	4.175	0.000526146	0.0121805	FDR
F49D11.10	-0.369062	18.1336	-4.1692	0.000533109	0.0122987	FDR
hacd-1	0.647608	16.4994	4.16582	0.000537218	0.0123504	FDR
lin-66	-0.272193	19.5549	-4.15271	0.000553423	0.0126789	FDR
ndx-8	1.53874	16.8934	4.15739	0.000555493	0.0126825	FDR
aatf-1	-0.37913	16.8563	-4.14582	0.000562146	0.0127903	FDR
Y75B8A.24	-0.347893	17.991	-4.12986	0.000582877	0.0132165	FDR
F53G2.12	0.385874	18.7916	4.12532	0.000588905	0.0133077	FDR
cisd-3.2	-0.516092	17.6803	-4.11084	0.000608588	0.0136949	FDR
btb-7	0.571864	16.189	4.10969	0.000610178	0.0136949	FDR
C55A6.4	1.52862	16.7189	4.11184	0.000615737	0.013773	FDR
abhd-11.2	0.449402	18.2464	4.10223	0.000620587	0.0138347	FDR
F46B6.6	0.376991	17.015	4.09422	0.000631973	0.0140413	FDR
nath-10	-0.578521	17.8366	-4.09118	0.000636362	0.0140688	FDR
C03H5.3	-0.433263	17.4707	-4.09041	0.000637461	0.0140688	FDR
mrps-15	-0.333222	18.1906	-4.08359	0.00064741	0.0142409	FDR
F26F12.3	-0.55404	16.0061	-4.08116	0.000650987	0.0142721	FDR
efk-1	-0.444024	17.4418	-4.07288	0.000663347	0.0144405	FDR
rpoa-49	-0.367429	18.0487	-4.07277	0.000663508	0.0144405	FDR
uggt-1	-0.274717	20.0067	-4.07164	0.000665211	0.0144405	FDR
Y11D7A.7	0.572653	16.8257	4.06516	0.000675069	0.0146066	FDR
aakg-1	0.385737	16.8924	4.06099	0.000681502	0.0146978	FDR
znf-207	-0.409909	18.2167	-4.047	0.000703487	0.0150165	FDR
prx-3	0.507312	17.6955	4.04456	0.000707404	0.0150165	FDR
hpo-11	-0.262824	17.9432	-4.04251	0.000710697	0.0150165	FDR
gpd-2	1.21108	22.0313	4.04596	0.000714673	0.0150165	FDR
F30A10.9	-0.595367	16.8284	-4.0402	0.000714437	0.0150165	FDR
kat-1	0.307682	21.9641	4.03998	0.000714791	0.0150165	FDR
F13H8.2	-0.357564	18.1021	-4.0397	0.000715248	0.0150165	FDR
ZK546-14	-0.386401	16.9072	-4.0395	0.00071557	0.0150165	FDR
alh-5	0.61726	17.2928	4.03881	0.000716693	0.0150165	FDR
dnj-10.1	0.340706	18.6015	4.03659	0.000720316	0.0150448	FDR
ZK792.5	-0.382962	17.9089	-4.0323	0.000727362	0.0151442	FDR
cbn-1	-1.2382	18.057	-4.03311	0.00073575	0.0152709	FDR
F23B12.7	-0.409167	18.2515	-4.02417	0.000740911	0.0153299	FDR
pro-2	-0.349647	17.9321	-4.01844	0.000750626	0.0154825	FDR
sax-2	-0.434901	18.3573	-4.0139	0.000758401	0.0155943	FDR
K01G5.5	-0.522699	21.165	-4.01066	0.000763994	0.0156139	FDR
mdh-2	0.434616	23.2906	4.01062	0.000764068	0.0156139	FDR
rps-0	-0.28705	23.8245	-4.00676	0.0007708	0.015703	FDR
stl-1	0.489954	21.0416	4.00343	0.000776654	0.0157737	FDR
rpl-33	-0.216601	23.1048	-3.99037	0.000800025	0.0161987	FDR
dlc-2	0.978788	17.1917	3.99276	0.000806087	0.0162716	FDR
rsd-3	-0.33745	16.3171	-3.98143	0.00081644	0.0164227	FDR
alh-10	0.717936	16.969	3.98164	0.000818532	0.0164227	FDR
pccb-1	0.341856	21.9543	3.97786	0.000823072	0.0164487	FDR
F55F10.1	-0.294896	17.552	-3.9767	0.000825248	0.0164487	FDR
sart-1	-0.260353	18.4327	-3.97562	0.000827279	0.0164487	FDR
T25B9.9	0.470113	21.3281	3.97124	0.000835558	0.0165404	FDR
F10D7.3	-0.391785	15.6399	-3.97053	0.000836889	0.0165404	FDR
pafo-1	-0.282558	19.1304	-3.96798	0.000841766	0.0165463	FDR
srpa-68	-0.296942	19.8139	-3.96776	0.000842185	0.0165463	FDR
Y20F4.4	0.501339	15.8195	3.96337	0.000850614	0.0166458	FDR
F10E9.11	-0.248028	15.932	-3.96251	0.000852278	0.0166458	FDR
ZK1320.9	0.384924	20.4	3.96065	0.000855889	0.0166672	FDR
Y57A10A.27	-0.385532	18.4348	-3.95486	0.000867214	0.0168382	FDR
pdi-6	-0.453006	21.2689	-3.9502	0.000876449	0.0169677	FDR
Y53C12B.1	-0.445347	18.1236	-3.94751	0.000881817	0.0170219	FDR
vit-3	-1.96598	23.4007	-3.94458	0.000898933	0.0172436	FDR
H41C03.1	-0.572843	17.0894	-3.93847	0.000900099	0.0172436	FDR
ccar-1	-0.302557	19.6952	-3.93798	0.000901114	0.0172436	FDR
hpo-19	0.308981	20.4662	3.93512	0.000906983	0.0172837	FDR
nlp-36	-0.331873	15.3928	-3.93442	0.000908433	0.0172837	FDR
sams-3	-0.659785	20.9578	-3.93538	0.00091573	0.0173581	FDR
atm-1	0.379638	18.3642	3.93	0.000917588	0.0173581	FDR
F36D4.5	-0.321574	17.5233	-3.92843	0.000920861	0.0173704	FDR
Y17G7B.12	-0.40825	16.516	-3.91604	0.000947156	0.0177582	FDR
unc-129	-0.343087	16.6887	-3.91553	0.000948239	0.0177582	FDR
cls-1	-0.282761	15.6788	-3.91496	0.000949466	0.0177582	FDR
Y53G8B.2	0.913041	17.1282	3.91562	0.000959826	0.017899	FDR
lpd-6	-0.355578	17.6147	-3.909	0.0009624	0.017899	FDR
morc-1	-0.310265	18.1549	-3.90577	0.000969495	0.0179805	FDR
cox-5b	0.82834	18.8714	3.90805	0.000976425	0.0180081	FDR
ard-1	0.331782	20.6619	3.90329	0.00097497	0.0180081	FDR
acs-21	1.56216	17.1853	3.90616	0.000980599	0.0180349	FDR
F29B9.1	0.458293	17.2642	3.89846	0.000985719	0.0180556	FDR
B0035.15	0.265594	21.2363	3.89781	0.000987183	0.0180556	FDR
rps-18	-0.200589	22.9425	-3.89614	0.000990931	0.0180743	FDR
K01G5.8	0.8394	16.4164	3.89956	0.000993772	0.0180763	FDR
ZK550.3	-0.329488	19.4578	-3.87879	0.00103076	0.0186977	FDR
dhs-8	0.905267	15.4372	3.88246	0.00103464	0.0187168	FDR
gro-1	0.419373	17.613	3.87186	0.00104709	0.0188098	FDR
iscu-1	0.3294	18.1715	3.87172	0.00104744	0.0188098	FDR
D2030.3	-0.330742	16.672	-3.87135	0.00104831	0.0188098	FDR
T28B8.1	0.875578	16.5889	3.87477	0.00105147	0.0188156	FDR
nuo-5	-0.554661	21.1836	-3.86853	0.00105693	0.0188623	FDR
fgt-1	0.693932	19.7296	3.86949	0.00106343	0.0189273	FDR
gly-9	-0.470488	17.3788	-3.85829	0.00107988	0.0191686	FDR
pyp-1	-0.279509	21.6484	-3.85233	0.00109459	0.0193777	FDR
fbp-1	0.41397	20.1375	3.84979	0.00110092	0.0194378	FDR
F59C6.5	-0.600298	20.6665	-3.84589	0.00111609	0.0196532	FDR
nol-14	-0.323929	17.1262	-3.84212	0.00112026	0.0196744	FDR
Y41D4B.11	-0.318021	16.4018	-3.83676	0.00113396	0.0198117	FDR
serp-1.1	-0.580247	17.0648	-3.83672	0.00113406	0.0198117	FDR
coa-4	0.437812	16.3287	3.83089	0.0011492	0.0200232	FDR
Y59A8B.8	0.287339	19.7776	3.82935	0.00115321	0.0200404	FDR
slc-25a32	-0.303987	15.9956	-3.8246	0.0011657	0.0201823	FDR
C34E10.10	-0.476119	16.8919	-3.82394	0.00116747	0.0201823	FDR
T02H6.1	-0.294143	17.9416	-3.82046	0.00117673	0.0202893	FDR
lrk-1	-0.242685	16.7633	-3.81357	0.00119526	0.0205296	FDR
Y23H5B.5	-0.309319	17.5782	-3.81298	0.00119686	0.0205296	FDR
F17A9.5	1.49858	16.8114	3.81153	0.00121476	0.020645	FDR
F40F8.1	0.411147	17.8636	3.80718	0.00121274	0.020645	FDR
bcs-1	0.28687	16.9888	3.80639	0.00121492	0.020645	FDR
R107.2	0.730353	17.5413	3.80936	0.00121814	0.020645	FDR
F59B1.2	1.40782	17.2292	3.80991	0.00121922	0.020645	FDR
F53C11.3	0.865161	19.1861	3.80767	0.00122542	0.020645	FDR
C01A2.4	0.454423	17.4246	3.80285	0.00122472	0.020645	FDR
hpd-1	1.21458	18.1495	3.80196	0.00124133	0.02086	FDR
ctl-2	1.23239	18.927	3.79984	0.00124731	0.0209074	FDR
T10B11.6	0.263145	17.5076	3.79073	0.00125887	0.021048	FDR
fan-1	0.511613	17.6262	3.78739	0.00126844	0.0211036	FDR
C26E6.12	0.502818	16.0934	3.78735	0.00126858	0.0211036	FDR
cysl-2	0.531132	19.5607	3.78064	0.00128802	0.0213158	FDR
cup-2	-0.330816	19.0527	-3.77943	0.00129158	0.0213158	FDR
ZK795.3	-0.305885	17.1534	-3.77861	0.00129399	0.0213158	FDR
letm-1	0.45171	17.4263	3.77853	0.00129421	0.0213158	FDR
mce-1	0.766448	18.6689	3.77987	0.00130495	0.0214395	FDR
Y54F10AM.5	-0.557949	19.6346	-3.75912	0.00135605	0.0221799	FDR
K07H8.2	-0.344907	16.8945	-3.75774	0.00135672	0.0221799	FDR
W01D2.1	-0.304406	21.1452	-3.75368	0.0013693	0.0223303	FDR
ZK1127.5	-0.387516	17.5111	-3.75193	0.00137473	0.0223582	FDR
T08A11.1	0.334206	20.0859	3.75096	0.00137776	0.0223582	FDR
cup-14	0.296139	16.7378	3.7488	0.00138454	0.0224133	FDR
utp-20	-0.31185	17.0338	-3.7463	0.0013924	0.0224698	FDR
spt-5	-0.312015	19.147	-3.74554	0.00139482	0.0224698	FDR
F35C11.5	0.73225	17.6899	3.74765	0.00140109	0.0225161	FDR
Y45F10D.7	-0.320101	17.6876	-3.74177	0.0014068	0.0225531	FDR
let-60	-0.448494	20.4356	-3.73497	0.00142867	0.0228484	FDR
inx-8	0.698236	18.3842	3.73676	0.00143604	0.0229086	FDR
kdp-1	0.780189	20.0341	3.73512	0.00144391	0.0229086	FDR
tag-151	-0.549366	18.454	-3.7301	0.00144454	0.0229086	FDR
trap-2	-0.482893	21.0577	-3.72957	0.00144628	0.0229086	FDR
nuo-2	-0.829799	19.6474	-3.72853	0.00146557	0.0230571	FDR
mans-3	-0.307895	15.9384	-3.72454	0.00146285	0.0230571	FDR
M60.4	1.93421	17.5761	3.72758	0.00146874	0.0230571	FDR
C27D8.4	0.422661	19.6774	3.72252	0.00146958	0.0230571	FDR
ctl-3	0.649104	16.404	3.7195	0.00148278	0.0232092	FDR
rpom-1	0.332363	17.4802	3.7136	0.00149959	0.023417	FDR
pdi-2	-0.579851	23.1348	-3.71102	0.00152171	0.0237065	FDR
paf-2	0.853814	16.4625	3.70953	0.0015299	0.023778	FDR
rpl-14	-0.245417	23.7299	-3.70289	0.00153648	0.0238245	FDR
set-32	1.09007	16.1971	3.7045	0.00154736	0.0239371	FDR
rpl-28	-0.292478	22.5762	-3.69853	0.00155172	0.0239486	FDR
ccep-97	0.668604	18.4375	3.69903	0.00156382	0.024054	FDR
ttr-47	0.58683	17.7057	3.69446	0.00156636	0.024054	FDR
syf-1	-0.239646	19.6304	-3.69352	0.00156945	0.024054	FDR
F13D11.4	-0.69562	17.1636	-3.69385	0.00157691	0.0240921	FDR
icl-1	0.956712	22.564	3.69345	0.00158649	0.0240921	FDR
efr-3	-0.318558	16.9053	-3.68968	0.00158319	0.0240921	FDR
T20B12.7	-0.27885	21.0208	-3.68886	0.00158614	0.0240921	FDR
F44B9.5	0.301551	16.9316	3.6828	0.00160807	0.0243639	FDR
inx-9	0.770676	15.8961	3.6785	0.00164102	0.0247583	FDR
ndx-4	2.42454	17.8303	3.67734	0.00164532	0.0247583	FDR
rpl-9	-0.266734	24.1201	-3.67352	0.00164224	0.0247583	FDR
crn-2	0.41415	17.8087	3.67036	0.00165406	0.0248334	FDR
cyc-2.1	0.412064	21.7635	3.66929	0.00165807	0.0248374	FDR
byn-1	-0.412635	18.3664	-3.66669	0.00166787	0.0249276	FDR
asd-2	-0.655967	17.5761	-3.66113	0.0016969	0.0253044	FDR
sdhd-1	0.667145	17.803	3.65927	0.00171028	0.0254467	FDR
mrps-22	-0.250017	19.5635	-3.65432	0.00171526	0.0254636	FDR
ech-5	0.367477	19.8116	3.65025	0.00173118	0.025614	FDR
T16G12.3	0.370086	15.8394	3.64912	0.00173559	0.025614	FDR
bcl-7	0.643213	17.3133	3.64984	0.001737	0.025614	FDR
prp-21	-0.287501	20.2823	-3.64345	0.00175803	0.0258336	FDR
C50F4.12	0.368185	16.1628	3.64201	0.00176379	0.0258336	FDR
F35H10.10	-0.639052	16.2595	-3.64215	0.0017675	0.0258336	FDR
F22B8.7	0.360063	18.1653	3.64135	0.00176643	0.0258336	FDR
F10G8.9	0.447561	18.0557	3.63438	0.00179452	0.0261548	FDR
tbc-9	-0.264046	16.8705	-3.63368	0.00179737	0.0261548	FDR
ldp-1	0.297644	20.3967	3.62913	0.00181599	0.0263676	FDR
ins-34	-0.843223	16.3768	-3.62877	0.00183604	0.0264612	FDR
T28F4.5	1.64463	17.0615	3.62864	0.00183658	0.0264612	FDR
ttr-33	1.08098	16.1141	3.62793	0.00183953	0.0264612	FDR
hrde-2	0.819182	20.955	3.62724	0.00184242	0.0264612	FDR
C37H5.13	0.725765	17.9401	3.62668	0.00184229	0.0264612	FDR
tag-225	0.882386	18.0317	3.62476	0.00185276	0.0265522	FDR
nol-58	-0.465416	21.3086	-3.61788	0.00186283	0.0266389	FDR
prx-14	1.12822	17.9762	3.61863	0.00187857	0.026663	FDR
EEED8.15	-0.321375	16.528	-3.6153	0.00187377	0.026663	FDR
dex-1.1	-0.743641	17.2558	-3.61784	0.00187887	0.026663	FDR
tgs-1	-0.268892	17.8812	-3.61296	0.00188371	0.026663	FDR
C08F1.10	0.547727	16.5063	3.61274	0.00188465	0.026663	FDR
lact-5	0.713129	17.4278	3.61327	0.00189819	0.0266996	FDR
vgln-1	-0.324441	22.9992	-3.60955	0.00189833	0.0266996	FDR
F11D5.1	-0.541247	16.4561	-3.60907	0.00190039	0.0266996	FDR
cpt-1	0.284365	20.5501	3.60768	0.00190637	0.0266996	FDR
T08G11.1	0.3004	20.3315	3.6069	0.00190974	0.0266996	FDR
Y47G6A.9	-0.579746	22.55	-3.60843	0.00191875	0.0266996	FDR
cyn-12	0.276427	18.4791	3.60554	0.00191565	0.0266996	FDR
Y37D8A.2	0.471389	19.83	3.60465	0.0019195	0.0266996	FDR
ule-4	1.03651	17.0207	3.6073	0.00192723	0.0267074	FDR
acaa-2	0.378185	22.9116	3.60267	0.00192813	0.0267074	FDR
F54A3.5	-0.368001	18.8688	-3.5995	0.00194201	0.0268435	FDR
col-165	-0.808263	16.4924	-3.5982	0.00196515	0.0270707	FDR
sqv-6	0.34376	17.3656	3.5929	0.00197122	0.0270707	FDR
mrrf-1	0.358617	17.9879	3.59244	0.0019733	0.0270707	FDR
ZC449.2	-0.794698	16.1879	-3.59557	0.00197889	0.0270707	FDR
ZC123.1	-0.601229	15.9727	-3.5925	0.00197857	0.0270707	FDR
C25H3.11	0.295172	17.4339	3.58993	0.00198451	0.0270916	FDR
hrpr-1	-0.273198	23.1899	-3.58778	0.00199418	0.0271676	FDR
ZK430.7	-0.280965	16.5847	-3.5855	0.0020045	0.0272521	FDR
E04F6.8	0.950223	17.1579	3.58313	0.0020352	0.0275564	FDR
F33G12.3	0.308425	17.8999	3.57954	0.00203171	0.0275564	FDR
col-166	-1.32636	17.1858	-3.582	0.00204038	0.0275701	FDR
gpx-2	0.518682	20.9762	3.57329	0.00206534	0.0278506	FDR
sma-9	-0.268159	16.7611	-3.56947	0.00207852	0.0279713	FDR
metl-6	0.287328	18.3352	3.56475	0.00210084	0.0282143	FDR
wdr-46	-0.336287	16.9985	-3.56332	0.00210766	0.0282486	FDR
mics-1	-0.312037	18.5226	-3.55969	0.00212501	0.0284236	FDR
let-716	-0.480219	18.4837	-3.55719	0.00213708	0.0284706	FDR
mrps-26	-0.242043	18.9548	-3.55696	0.00213819	0.0284706	FDR
F33E11.3	-0.353224	18.2512	-3.55629	0.00214142	0.0284706	FDR
F58B3.4	-0.303793	16.4815	-3.55402	0.00215244	0.0285597	FDR
pnn-1	-0.340461	19.3117	-3.54957	0.00217422	0.028791	FDR
rbm-22	-0.218008	19.0103	-3.54864	0.00217879	0.0287939	FDR
ndx-3	0.377305	16.9453	3.54382	0.00220265	0.0290512	FDR
eri-5	0.387295	16.864	3.54122	0.00221564	0.0291645	FDR
ZC373.5	0.383106	16.0638	3.53926	0.00222548	0.0292359	FDR
tbc-1	0.624313	17.8162	3.53527	0.00225663	0.0295864	FDR
B0238.11	-0.35521	19.2465	-3.53202	0.00226218	0.0295991	FDR
gpcp-2	-0.305818	16.7341	-3.5296	0.0022746	0.0295991	FDR
tbck-1	-0.272198	15.7376	-3.52946	0.0022753	0.0295991	FDR
sop-3	-0.235041	17.2537	-3.52943	0.00227548	0.0295991	FDR
dod-23	1.47452	17.9515	3.52932	0.00229766	0.029829	FDR
F29B9.11	0.66903	20.0774	3.52581	0.00231389	0.0299809	FDR
amdh-1	0.449172	15.6077	3.5138	0.00235724	0.0304747	FDR
rnp-4	-0.343391	20.7583	-3.51266	0.00236333	0.0304747	FDR
Y4C6B.3	0.308774	21.4975	3.5122	0.0023658	0.0304747	FDR
F02E9.7	-0.444488	16.6514	-3.50838	0.00238628	0.0306787	FDR
acdh-10	0.45856	22.1464	3.50488	0.00240523	0.0308554	FDR
Y63D3A.7	-0.476052	21.5468	-3.50412	0.00240934	0.0308554	FDR
ttr-44	1.3069	17.896	3.50593	0.0024219	0.0308612	FDR
C06B8.7	0.558724	18.0521	3.50345	0.00241828	0.0308612	FDR
acs-13	-0.307688	21.0066	-3.50148	0.00242378	0.0308612	FDR
dhhc-4	-0.295061	17.6915	-3.4973	0.00244675	0.0310576	FDR
M04B2.2	0.329037	15.9801	3.49697	0.00244858	0.0310576	FDR
nex-1	0.678738	21.8731	3.49595	0.00247696	0.0312976	FDR
popl-1	-0.294336	16.8009	-3.49275	0.00247199	0.0312945	FDR
ptc-3	-0.869985	17.0617	-3.49198	0.00249918	0.0315182	FDR
C13G5.2	-0.498066	16.3211	-3.48541	0.0025133	0.031636	FDR
mog-2	-0.274521	21.1055	-3.48133	0.00253654	0.031868	FDR
rnst-2	0.328251	20.0883	3.48039	0.00254195	0.0318754	FDR
ing-3	-0.254171	16.9274	-3.46767	0.00261596	0.0327415	FDR
rrp-1	-0.424777	17.2988	-3.4666	0.00262226	0.0327584	FDR
acs-11	0.519469	18.4228	3.46525	0.00263027	0.0327966	FDR
K12H4.3	-0.377397	17.6113	-3.4638	0.00263889	0.0328308	FDR
atgl-1	0.350044	15.9862	3.46312	0.00264293	0.0328308	FDR
dnj-8	-0.436859	18.4639	-3.46099	0.00265563	0.0329269	FDR
asp-4	0.485248	20.0885	3.45933	0.0026656	0.0329591	FDR
B0361.6	-0.248399	17.1496	-3.45735	0.00267754	0.0329591	FDR
mrps-17	-0.279814	20.4303	-3.45726	0.00267812	0.0329591	FDR
dnc-5	0.498575	17.7102	3.4565	0.00268269	0.0329591	FDR
C05C10.3	0.47469	17.9738	3.45643	0.00268313	0.0329591	FDR
sqrd-1	1.22096	16.7595	3.45807	0.00269726	0.0330715	FDR
K11H3.3	0.340746	19.6893	3.45128	0.00271446	0.0332094	FDR
rars-2	0.2883	18.2169	3.45061	0.00271855	0.0332094	FDR
zipt-7.1	0.638598	16.4497	3.4509	0.00272445	0.0332202	FDR
T04G9.7	0.570351	18.5107	3.44862	0.00274076	0.0333577	FDR
ZK512.2	-0.38411	18.0416	-3.44072	0.00277982	0.033771	FDR
C13B9.2	0.36063	16.9082	3.43937	0.00278834	0.0337795	FDR
art-1	0.239198	20.9615	3.43751	0.00280004	0.0337795	FDR
hrpf-1	-0.229482	20.2318	-3.4373	0.00280137	0.0337795	FDR
chdp-1	-0.581742	23.4696	-3.43847	0.00281545	0.0337795	FDR
hpo-10	-0.319126	18.1526	-3.436	0.00280957	0.0337795	FDR
acdh-9	0.444106	17.9406	3.43511	0.00281523	0.0337795	FDR
ilys-4	0.445607	15.6692	3.43495	0.00281623	0.0337795	FDR
dhs-22	0.267569	18.8132	3.43161	0.00283752	0.0339732	FDR
homt-1	0.546335	16.9402	3.4277	0.00286262	0.0342119	FDR
wdr-4	-0.326191	21.1379	-3.42179	0.00290097	0.0345761	FDR
romo-1	0.457319	18.9792	3.42074	0.00290788	0.0345761	FDR
pus-1	-0.330213	17.3411	-3.42032	0.00291059	0.0345761	FDR
C02D5.2	-0.55215	16.7621	-3.4198	0.00291398	0.0345761	FDR
F38B2.4	1.10061	17.9319	3.41873	0.00294651	0.0348995	FDR
W02B12.11	-0.34382	17.409	-3.41314	0.00295808	0.034974	FDR
Y48B6A.1	-0.400852	17.608	-3.40928	0.00298386	0.0352159	FDR
abhd-3.1	0.537283	17.0904	3.40709	0.00299862	0.0353271	FDR
B0507.2	0.632511	17.8646	3.40748	0.00301708	0.0353614	FDR
C27B7.2	0.612731	17.4989	3.40626	0.00301481	0.0353614	FDR
gcs-1	0.289326	19.3028	3.40429	0.00301755	0.0353614	FDR
gpx-1	0.760229	16.7195	3.40654	0.00302487	0.0353846	FDR
emc-2	-0.195876	20.4797	-3.39943	0.00305078	0.0356122	FDR
alx-1	0.408322	20.308	3.39812	0.00305979	0.0356122	FDR
tbca-1	0.377819	17.9098	3.39802	0.00306046	0.0356122	FDR
T22D1.3	0.563925	20.7155	3.39786	0.003083	0.0357067	FDR
unc-45	-0.398428	19.6268	-3.39513	0.00308044	0.0357067	FDR
casc-3	-0.454301	18.719	-3.39451	0.00308477	0.0357067	FDR
F17E9.4	0.817327	16.3872	3.38833	0.00315458	0.0364511	FDR
ctbp-1	-0.505898	16.4739	-3.38295	0.00316603	0.0365196	FDR
grl-21	2.10071	17.5064	3.38364	0.00318798	0.0366451	FDR
faah-4	0.363536	19.0828	3.38045	0.00318386	0.0366451	FDR
coa-5	0.375906	17.7083	3.37572	0.00321792	0.0369252	FDR
rha-2	-0.328117	16.7974	-3.37293	0.00323815	0.0370931	FDR
srpa-72	-0.220492	20.9085	-3.37139	0.00324944	0.0371581	FDR
alh-1	0.308206	22.2974	3.36968	0.00326194	0.0372367	FDR
ges-1	0.458708	16.4775	3.36781	0.00327567	0.0373291	FDR
jhdm-1	-0.209784	18.0167	-3.36668	0.00328398	0.0373595	FDR
hpo-28	-0.433644	16.3846	-3.36479	0.00329801	0.0374547	FDR
ppw-1	0.426866	20.2893	3.3615	0.00332247	0.037668	FDR
K09A9.6	0.653165	16.036	3.3618	0.0033435	0.0377797	FDR
R11D1.10	0.240784	16.7564	3.3585	0.00334498	0.0377797	FDR
C35D10.5	0.29578	17.684	3.35736	0.00335354	0.0377797	FDR
pcm-1	0.540286	17.2021	3.35715	0.00335515	0.0377797	FDR
F25G6.8	-0.405199	18.1927	-3.35619	0.00336235	0.0377965	FDR
F15H10.8	-0.874913	16.8517	-3.35853	0.00337253	0.0378163	FDR
dhp-2	-0.513905	17.884	-3.35443	0.00337572	0.0378163	FDR
syx-5	-0.219929	17.8621	-3.3537	0.00338125	0.0378163	FDR
M106.8	0.641385	17.9653	3.35359	0.00340559	0.038007	FDR
rfth-1	0.423542	17.2745	3.34899	0.00341722	0.038007	FDR
C23G10.2	0.460136	19.853	3.34876	0.00341893	0.038007	FDR
rpoa-1	-0.277601	19.1778	-3.34846	0.00342126	0.038007	FDR
F09C8.2	-0.232696	15.9422	-3.3473	0.00343023	0.0380427	FDR
hsp-60	0.325392	23.4732	3.34503	0.00344776	0.0381733	FDR
alh-4	0.416508	19.3555	3.3416	0.00347443	0.038392	FDR
D2030.4	-0.399942	18.9611	-3.341	0.00347912	0.038392	FDR
W07E11.1	-0.271528	21.3637	-3.33878	0.00349648	0.0385194	FDR
pmp-4	0.833324	16.1078	3.34049	0.00351162	0.0385579	FDR
erl-1	0.442752	18.5091	3.33747	0.0035068	0.0385579	FDR
rrbs-1	-0.452426	18.6822	-3.33262	0.00354516	0.0388618	FDR
T22C1.6	-0.303063	19.9174	-3.33147	0.00355437	0.0388983	FDR
gcp-2.1	0.611869	17.992	3.32927	0.00359556	0.0392536	FDR
F54F7.2	0.695279	15.9788	3.32934	0.00359869	0.0392536	FDR
sap-49	-0.280205	18.6787	-3.32381	0.003616	0.0393775	FDR
nhr-46	-0.382103	17.0998	-3.32223	0.00362881	0.0394315	FDR
F13D2.1	0.998062	18.4133	3.3246	0.00363882	0.0394315	FDR
ubc-13	-0.385984	18.9045	-3.3213	0.00363639	0.0394315	FDR
nsun-1	-0.377994	19.0543	-3.31439	0.00369323	0.0399557	FDR
B0495.8	-0.241639	19.0843	-3.31188	0.00371405	0.0401153	FDR
fbxc-51	-0.492241	18.7442	-3.30731	0.00375407	0.0404815	FDR
C16A3.5	-0.483702	20.0772	-3.3059	0.00376867	0.0405729	FDR
Y69H2.3	0.654544	15.68	3.30723	0.00378296	0.0405872	FDR
C05G5.2	-0.205109	16.4136	-3.30344	0.00378508	0.0405872	FDR
cbd-1	0.35019	15.538	3.30305	0.00378838	0.0405872	FDR
F52G3.1	-0.274193	17.5022	-3.29944	0.00381919	0.0408208	FDR
C25H3.9	-0.34321	16.1534	-3.29883	0.00382435	0.0408208	FDR
ruvb-1	-0.190994	21.7916	-3.29833	0.00382869	0.0408208	FDR
ZK228.3	0.49529	15.7233	3.2968	0.00384675	0.0409475	FDR
F44G4.1	-0.319621	17.464	-3.29527	0.00385503	0.0409698	FDR
K11D2.1	0.288883	16.4203	3.29423	0.00386404	0.0409997	FDR
C44E4.5	0.330391	18.9147	3.29307	0.00387408	0.0410404	FDR
htz-1	0.506159	22.6961	3.29316	0.00389358	0.0411812	FDR
golg-2	-0.197036	19.2706	-3.28936	0.00390644	0.0412512	FDR
C36B1.11	-0.321044	16.9085	-3.28482	0.00394634	0.0416062	FDR
prdx-6	0.460325	19.8929	3.28325	0.00396029	0.0416648	FDR
eif-3.D	-0.192645	20.6267	-3.28198	0.0039716	0.0416648	FDR
cyn-13	-0.281509	19.1747	-3.28105	0.00397988	0.0416648	FDR
ric-3	-0.430112	16.1188	-3.28091	0.00398114	0.0416648	FDR
sac-1	-0.275454	18.356	-3.28066	0.00398336	0.0416648	FDR
Y39G10AR.9	0.415991	20.2291	3.27872	0.00400065	0.0417796	FDR
ucr-2.2	0.608543	18.7076	3.27899	0.00402448	0.0419427	FDR
bcat-1	0.86667	16.9154	3.27905	0.00402893	0.0419427	FDR
repo-1	-0.229005	17.481	-3.27028	0.00407698	0.0423763	FDR
F37F2.2	-0.234066	18.0742	-3.26728	0.00410446	0.0425951	FDR
T23F2.13	-1.08315	17.2013	-3.26071	0.0041973	0.0434903	FDR
smk-1	-0.256887	18.939	-3.2517	0.00425016	0.0439692	FDR
lit-1	-0.352808	18.5135	-3.24666	0.00429837	0.0443986	FDR
F42F12.3	0.478618	16.5608	3.24582	0.00430644	0.0444127	FDR
lin-65	-0.283074	19.094	-3.24369	0.004327	0.0445553	FDR
heh-1	0.47075	19.3953	3.23624	0.00440198	0.045257	FDR
lgc-22	-0.928502	16.3077	-3.23539	0.00444125	0.04559	FDR
slt-1	0.660467	16.5407	3.23297	0.00445904	0.0457017	FDR
F15B9.10	0.596027	16.4715	3.22768	0.00449416	0.0459905	FDR
F32B5.1	1.4444	17.5215	3.2291	0.00450394	0.0460194	FDR
lact-4	0.826155	18.9326	3.22574	0.00453771	0.0462151	FDR
M01E5.2	0.247242	16.3416	3.22322	0.00452959	0.0462102	FDR
Y48E1B.8	-0.722066	16.8623	-3.22407	0.00455024	0.0462151	FDR
F46F11.1	0.23951	18.6664	3.22111	0.00455101	0.0462151	FDR
ate-1	0.204346	18.3483	3.21895	0.00457301	0.0463673	FDR
hacl-1	0.543475	19.8566	3.21973	0.00459268	0.0464956	FDR
ttr-15	1.42985	16.8336	3.21797	0.004617	0.0465994	FDR
K05C4.5	-0.484309	17.7071	-3.21568	0.00460648	0.0465641	FDR
T08G5.3	-0.533271	15.7588	-3.21473	0.00463379	0.0466976	FDR
H28G03.2	-0.344463	17.7128	-3.21141	0.00465069	0.0467967	FDR
ain-2	-0.542071	17.1597	-3.20999	0.00466586	0.0468781	FDR
B0250.5	0.325249	20.7632	3.20807	0.00468542	0.0470033	FDR
nra-4	-0.176434	21.5683	-3.20486	0.00471917	0.0472524	FDR
let-754	0.298965	21.4936	3.20435	0.00472452	0.0472524	FDR
ZK1073.1	0.548924	20.905	3.20209	0.00477725	0.047706	FDR
hyl-1	-0.337848	16.4267	-3.19872	0.00478429	0.047706	FDR
pqn-32	-1.22519	18.3436	-3.19966	0.00480909	0.0478812	FDR
hmg-4	-0.243446	19.1237	-3.19459	0.0048286	0.0479299	FDR
cest-2.1	0.57161	16.3693	3.19476	0.00483499	0.0479299	FDR
spk-1	-0.269361	18.6031	-3.19384	0.00483664	0.0479299	FDR
sgca-1	-0.491064	15.7151	-3.19335	0.00485018	0.0479299	FDR
F28D9.4	-0.31587	17.6024	-3.19282	0.00484768	0.0479299	FDR
cex-1	1.24615	16.3242	3.19335	0.00487709	0.0480524	FDR
sec-61.a	-0.276936	22.9302	-3.19035	0.00487449	0.0480524	FDR
Y111B2A.2	0.620149	18.4222	3.19039	0.00490467	0.0482523	FDR
Y43F8C.13	-0.316678	17.9338	-3.186	0.00492195	0.0483017	FDR
C37C3.2	0.247328	20.6033	3.18579	0.00492428	0.0483017	FDR
nuc-1	-0.379361	17.5028	-3.18488	0.00493423	0.0483278	FDR
ent-6	-0.646504	16.7896	-3.18476	0.00496452	0.0485382	FDR
F37A4.2	-0.28643	16.8275	-3.18161	0.00497038	0.0485382	FDR
let-767	0.336693	19.9132	3.17651	0.0050272	0.0490208	FDR
adr-1	-0.293122	20.2438	-3.17516	0.00504239	0.0490966	FDR
Y49F6C.8	-0.798151	17.8266	-3.17558	0.00507365	0.0492561	FDR
tex-2	0.264355	19.6561	3.17295	0.00506728	0.0492561	FDR
pes-9	-0.324014	20.5879	-3.17086	0.00509092	0.0492932	FDR
nep-1	-0.337906	19.5531	-3.17073	0.00509236	0.0492932	FDR
T26C11.4	-0.302638	16.4732	-3.16023	0.0052129	0.0503863	NS
cst-1	-0.377082	18.8168	-3.15661	0.0052551	0.0506929	NS
dnj-28	-0.34318	16.3157	-3.15619	0.00525994	0.0506929	NS
cnk-1	-0.239371	16.8739	-3.15047	0.0053274	0.0512684	NS
tln-1	-0.945501	16.8479	-3.1499	0.00537151	0.0514197	NS
strm-1	-0.339884	16.2535	-3.14694	0.00536943	0.0514197	NS
snx-3	-0.213215	19.973	-3.14684	0.00537064	0.0514197	NS
Y94H6A.5	-0.305875	16.914	-3.14628	0.00537736	0.0514197	NS
F19C6.2	-0.266719	17.0787	-3.14589	0.00538195	0.0514197	NS
E02H9.3	0.354877	17.4088	3.14372	0.00540806	0.0515948	NS
F43B10.1	-0.459198	16.6052	-3.141	0.00544083	0.0517743	NS
mai-2	0.302875	23.042	3.14086	0.00544252	0.0517743	NS
W09H1.5	0.28925	20.5118	3.13978	0.00545566	0.0518249	NS
gas-1	-0.592249	19.7195	-3.13898	0.00549977	0.0520199	NS
rnp-6	-0.161908	19.0706	-3.1365	0.00549552	0.0520199	NS
F09G2.8	0.291623	18.0085	3.13623	0.00549888	0.0520199	NS
atg-2	-0.256749	17.5032	-3.1317	0.00555461	0.0524495	NS
ugt-5	0.558563	16.2201	3.13215	0.00556102	0.0524495	NS
hse-5	-0.361946	17.3366	-3.1305	0.00556943	0.052454	NS
cey-1	-0.468348	21.656	-3.12818	0.00560982	0.0527594	NS
D1086.12	0.668837	17.7294	3.12252	0.00570781	0.0536049	NS
F10C2.5	-0.26371	17.0181	-3.11771	0.00572993	0.0537316	NS
dph-7	0.503968	16.7013	3.11712	0.00573754	0.0537316	NS
emb-4	-0.23029	21.2205	-3.11515	0.00576266	0.0538906	NS
smi-1	0.337399	17.4282	3.11209	0.00580198	0.0541818	NS
rsbp-1	-0.338524	17.0864	-3.10475	0.00589729	0.0549943	NS
pro-1	-0.262211	17.5366	-3.10153	0.00593954	0.0553104	NS
Y73F8A.27	0.311983	18.1638	3.09603	0.00601257	0.0558453	NS
T28C6.7	-0.28354	19.1887	-3.09593	0.00601385	0.0558453	NS
algn-5	-0.309543	18.0482	-3.09447	0.00603334	0.0559478	NS
Y73E7A.8	-1.02607	17.6776	-3.09608	0.00605196	0.056013	NS
mfn-1	-0.376981	17.9833	-3.09239	0.00606133	0.056013	NS
nhr-69	-0.264625	16.2419	-3.09206	0.00606574	0.056013	NS
flad-1	0.285624	17.4209	3.09134	0.00607546	0.0560245	NS
bre-1.1	-0.805098	17.735	-3.08954	0.00614023	0.0565431	NS
eif-2A	-0.470805	20.8722	-3.08581	0.00616236	0.0566078	NS
R151.2	-0.208929	20.3617	-3.08454	0.00616766	0.0566078	NS
gly-3	-0.23834	19.2	-3.08416	0.00617291	0.0566078	NS
zig-6	1.14767	17.0382	3.08541	0.00619649	0.0566758	NS
F23C8.5	0.285741	22.0703	3.08237	0.00619745	0.0566758	NS
F09E5.7	0.319868	18.2543	3.08007	0.00622912	0.0568869	NS
F45H10.3	-0.899254	20.7768	-3.07835	0.00629406	0.0574008	NS
gpi-1	0.60627	20.0893	3.07579	0.00632971	0.0576349	NS
C02G6.2	0.83316	17.2564	3.07526	0.00633714	0.0576349	NS
F55G11.8	0.55634	16.0329	3.0724	0.00636479	0.057754	NS
gad-3	0.833846	21.8603	3.07247	0.00637631	0.057754	NS
eif-3.G	-0.218869	21.4381	-3.06952	0.0063764	0.057754	NS
Y57A10A.13	0.303406	18.3239	3.06752	0.00640483	0.0578795	NS
D1007.10	0.354398	16.0302	3.06731	0.00640774	0.0578795	NS
nduf-2.2	-1.1714	19.333	-3.06872	0.00642942	0.0579173	NS
C09E7.7	0.409281	16.2942	3.06595	0.00642715	0.0579173	NS
D1069.3	-0.231549	17.6769	-3.06392	0.00645606	0.0580782	NS
ssb-1	-0.435304	21.4723	-3.06125	0.00650046	0.0583191	NS
dpy-1	-0.436698	16.2446	-3.0609	0.00649936	0.0583191	NS
F59F4.3	0.343539	15.8869	3.05933	0.00652195	0.0584328	NS
brf-1	-0.281224	17.6484	-3.05829	0.00653708	0.0584892	NS
C25H3.14	1.16599	17.2341	3.0561	0.00661111	0.0590717	NS
Y53H1B.2	0.607557	17.3084	3.05392	0.00663584	0.0592128	NS
ceeh-1	0.525497	15.9541	3.04968	0.00668173	0.0595066	NS
aman-1	1.02059	19.1726	3.05033	0.00669573	0.0595066	NS
vps-25	-0.214669	17.8498	-3.04785	0.00668973	0.0595066	NS
C11H1.9	-0.533409	16.6345	-3.04182	0.00678562	0.0602246	NS
mrs-2	0.305981	17.3241	3.03961	0.00681274	0.0603682	NS
wts-1	-0.250579	16.6797	-3.03913	0.00682003	0.0603682	NS
ugt-51	0.295572	16.085	3.03683	0.00685475	0.0605946	NS
rpl-16	-0.264725	23.6544	-3.03378	0.0069011	0.0608788	NS
atx-2.1	-0.236148	19.869	-3.03351	0.0069053	0.0608788	NS
spp-15	1.05479	18.9528	3.03353	0.00694852	0.0610971	NS
nsy-7	-0.246322	15.8299	-3.03072	0.00694797	0.0610971	NS
gstk-1	1.21126	16.2066	3.03224	0.00696827	0.0611895	NS
rga-2	-0.329819	15.8406	-3.02858	0.00698086	0.0612189	NS
C25H3.7	0.341704	18.6118	3.02419	0.00704894	0.0617341	NS
eif-3.I	-0.247628	21.6731	-3.02113	0.00709672	0.0620253	NS
ipgm-1.1	0.711486	16.4616	3.02178	0.00713081	0.0620253	NS
enpl-1	-0.285193	24.3474	-3.01959	0.00712099	0.0620253	NS
F42H10.6	0.354532	18.1197	3.01917	0.00712745	0.0620253	NS
mrpl-41	-0.230047	19.5984	-3.01862	0.00713614	0.0620253	NS
gcsh-1	-0.393523	17.0256	-3.01848	0.00713839	0.0620253	NS
tba-2	-0.385933	23.0694	-3.01355	0.00721654	0.0626222	NS
moc-2	0.291692	16.7515	3.01215	0.00723882	0.0627332	NS
nars-2	0.27966	17.2154	3.01096	0.0072578	0.0627765	NS
zer-1	-0.426644	16.6588	-3.01065	0.00726277	0.0627765	NS
C03A3.2	-0.411913	16.6143	-3.00951	0.00728111	0.062853	NS
EEED8.2	-0.330505	16.8098	-3.0074	0.00731513	0.0630645	NS
Y71G10AR.4	0.841035	19.5346	3.00852	0.00734203	0.0631319	NS
hsp-75	0.21666	20.224	3.00601	0.00733751	0.0631319	NS
brd-1	0.4223	17.4397	3.00508	0.00735263	0.063141	NS
M199.2	0.432763	17.0182	3.00445	0.00736289	0.0631472	NS
B0432.10	-0.216765	17.0652	-3.00018	0.00743256	0.0636624	NS
F21D5.7	-0.206658	20.1862	-2.99822	0.00746469	0.0638549	NS
pqn-24	0.788435	16.638	2.99561	0.00755353	0.0644412	NS
mlcd-1	0.280488	16.4523	2.99357	0.00754164	0.0644299	NS
Y71F9B.9	-0.775693	16.7097	-2.99507	0.00756242	0.0644412	NS
W06E11.1	-0.2626	17.2008	-2.99018	0.00759812	0.0646621	NS
pyc-1	0.288374	21.7645	2.98547	0.00767737	0.0651325	NS
ZK858.7	-0.21004	17.7925	-2.985	0.00768541	0.0651325	NS
ced-1.1	0.218106	17.2952	2.98498	0.00768576	0.0651325	NS
rbm-28	-0.297374	16.3237	-2.98407	0.00770107	0.0651325	NS
trap-4	-0.280437	22.6793	-2.98221	0.00773267	0.0651325	NS
cul-5	-0.384798	18.7646	-2.98178	0.00774001	0.0651325	NS
gpdh-2	0.377589	21.6258	2.98172	0.00774113	0.0651325	NS
coa-6	1.4582	17.1472	2.98312	0.00776374	0.0651325	NS
klp-11	-0.326762	16.494	-2.98009	0.00776894	0.0651325	NS
atg-9	-0.225874	17.6945	-2.97998	0.00777087	0.0651325	NS
cpi-2	0.429895	21.767	2.98036	0.00777531	0.0651325	NS
T16G1.9	-0.183505	18.7304	-2.97954	0.0077783	0.0651325	NS
C18E9.4	-0.440097	19.273	-2.97976	0.00778128	0.0651325	NS
F53A10.2	-0.180829	15.6611	-2.97739	0.00781522	0.065334	NS
glrx-22	0.216042	18.1792	2.97563	0.00784563	0.0655056	NS
tiar-2	-0.227274	19.828	-2.97446	0.00786578	0.0655911	NS
ZK686.2	-0.331331	17.5952	-2.96854	0.00796888	0.0663672	NS
ttr-2	0.885838	17.6622	2.97001	0.00799046	0.0663827	NS
mccc-1	0.207795	21.1132	2.9673	0.00799079	0.0663827	NS
fars-1	-0.280464	21.395	-2.96584	0.00801638	0.0665118	NS
F21F3.6	-0.607314	17.3307	-2.96656	0.00804365	0.0665158	NS
ZK632.12	0.241633	18.4975	2.96469	0.00803676	0.0665158	NS
dpy-3	-1.05651	17.3551	-2.96542	0.00807141	0.0665514	NS
attf-2	-0.179398	21.8271	-2.96365	0.00805513	0.0665158	NS
acdh-7	0.258881	21.069	2.96354	0.00805704	0.0665158	NS
ags-3	-0.385141	17.2573	-2.9595	0.00812893	0.0669423	NS
M60.4	1.7499	17.5822	2.96024	0.0081636	0.0670875	NS
gsp-2	-0.452615	20.5279	-2.95815	0.00816682	0.0670875	NS
acs-20	-0.516401	16.8396	-2.95399	0.00823498	0.0675636	NS
K07F5.22	-0.537451	16.1028	-2.9526	0.00828264	0.0678705	NS
C35B1.5	0.992304	19.7595	2.95167	0.00831838	0.067995	NS
F33H1.4	-0.283477	20.5731	-2.94959	0.00830803	0.0679944	NS
pgp-2	0.477623	18.7486	2.94857	0.00834519	0.0680462	NS
mop-25.2	0.408279	20.0529	2.94784	0.00833985	0.0680462	NS
W03F9.4	1.63342	16.9933	2.9478	0.00838922	0.0680864	NS
ttr-5	0.932079	17.7864	2.9474	0.0083966	0.0680864	NS
myrf-1	0.3562	16.6004	2.94538	0.00838513	0.0680864	NS
pqn-83	0.358938	17.58	2.94472	0.0083972	0.0680864	NS
sup-26	-0.363537	17.8023	-2.94449	0.00840154	0.0680864	NS
col-10	-1.39616	17.8764	-2.94464	0.00844748	0.068375	NS
algn-10	0.27863	17.7177	2.93709	0.00853912	0.0690323	NS
Y39A1A.20	-0.420702	16.1168	-2.93136	0.00864721	0.069821	NS
nlt-1	1.10573	18.2691	2.93127	0.00869858	0.0701502	NS
pry-1	0.286014	15.6476	2.92786	0.00871386	0.070188	NS
Y87G2A.13	0.311666	19.052	2.92029	0.00885978	0.0712765	NS
F25B4.8	0.275316	15.5274	2.91746	0.00891485	0.0716325	NS
lgc-21	-0.94463	16.2431	-2.91339	0.00904535	0.0723295	NS
zhit-2	0.53595	15.8636	2.913	0.00904461	0.0723295	NS
rpl-24.1	-0.211632	23.822	-2.91115	0.00903894	0.0723295	NS
C03H12.1	-0.255694	16.1578	-2.91093	0.00904327	0.0723295	NS
F27D4.1	0.283124	23.114	2.91028	0.0090562	0.0723295	NS
F23H11.5	0.45698	18.2318	2.90971	0.00907736	0.0724111	NS
ZC434.8	0.454578	23.3391	2.90774	0.00914821	0.0728884	NS
acl-1	0.373737	16.1152	2.90487	0.00916404	0.0729268	NS
F54C8.4	-0.230233	18.7909	-2.90356	0.00919036	0.0730484	NS
F46C8.8	-0.905087	16.2571	-2.90483	0.00921614	0.0731282	NS
crn-6	1.36781	16.1287	2.90452	0.00922248	0.0731282	NS
syf-3	-0.21127	19.6595	-2.90095	0.00924308	0.0732039	NS
oaz-1	0.724506	16.7456	2.90229	0.00926739	0.0733087	NS
ula-1	0.260381	19.5707	2.89862	0.00929036	0.0733259	NS
ptc-1	0.420751	17.3294	2.89855	0.00929171	0.0733259	NS
F22D6.2	-0.45588	18.3334	-2.89481	0.00938028	0.0739367	NS
pept-1	-0.762638	16.6439	-2.89457	0.00942493	0.0740563	NS
gly-5	-0.25154	17.4602	-2.8919	0.00942801	0.0740563	NS
fzr-1	-0.291054	16.841	-2.89185	0.00942901	0.0740563	NS
cri-3	0.465035	20.74	2.89172	0.00946374	0.074241	NS
ucr-2.3	0.250117	19.8359	2.88723	0.00952472	0.0746309	NS
agt-1	0.29706	18.602	2.88418	0.00958832	0.075028	NS
H42K12.3	-0.852268	19.3245	-2.88547	0.00961385	0.0750628	NS
T26G10.1	-0.334592	17.396	-2.88372	0.00959806	0.075028	NS
Y55F3BR.2	-0.373675	15.8278	-2.87767	0.00972586	0.0758479	NS
F27C1.6	-0.260318	16.934	-2.87359	0.00981277	0.0764357	NS
T06A1.5	-0.365476	15.7642	-2.87277	0.0098304	0.076483	NS
idhb-1	0.365876	20.9803	2.87221	0.00984248	0.0764872	NS
F27C1.2	0.398976	17.1357	2.87095	0.00986966	0.0766085	NS
F20D1.3	0.713033	18.7459	2.87094	0.00992325	0.0768194	NS
tcc-1	0.383418	22.7894	2.86804	0.00993329	0.0768194	NS
pdcd-2	-0.293764	18.2011	-2.86784	0.00993674	0.0768194	NS
ZC247.2	-0.368472	15.9412	-2.86754	0.00994325	0.0768194	NS
seld-1	0.251524	15.9884	2.86597	0.00997738	0.0769933	NS
npp-25	0.244307	20.4403	2.86389	0.0100229	0.0772544	NS
smu-1	-0.209321	19.5331	-2.86319	0.0100381	0.077282	NS
gly-20	-0.297721	16.7084	-2.86072	0.0100924	0.0776096	NS
F15B9.8	-0.927936	18.3688	-2.85963	0.0101705	0.0781196	NS
bre-1	-0.545543	18.225	-2.85817	0.0101943	0.0781742	NS
tbcc-1	0.319817	16.8503	2.8558	0.0102013	0.0781742	NS
lbp-2	0.630088	18.5911	2.85248	0.01033	0.0789777	NS
pqn-21	-0.206516	15.9604	-2.85021	0.0103263	0.0789777	NS
H11E01.3	-0.48819	16.0673	-2.84937	0.0103609	0.0791228	NS
slc-17.7	-0.245326	16.1385	-2.84698	0.0103993	0.0793248	NS
nduo-1	-0.948837	18.4524	-2.84688	0.0104565	0.0795633	NS
mel-11	-0.24015	18.6634	-2.84507	0.0104427	0.0795633	NS
C01G5.5	0.407455	18.507	2.8437	0.010474	0.0795633	NS
F37C4.5	0.53135	19.5926	2.84473	0.0104983	0.0795633	NS
daf-16	-0.307111	17.005	-2.84317	0.0104861	0.0795633	NS
C15C7.4	0.744867	15.7042	2.84408	0.0105205	0.0795633	NS
K07C5.6	-0.222151	17.9531	-2.84223	0.0105075	0.0795633	NS
sgn-1	-0.485536	16.9989	-2.84142	0.0105267	0.0795633	NS
C32E8.9	0.399717	17.9917	2.84011	0.0105561	0.0796899	NS
tsn-1	-0.22037	23.5895	-2.83961	0.0105676	0.0796899	NS
nola-3	-0.349442	20.662	-2.83816	0.0106011	0.0798523	NS
C27H6.9	0.305253	17.6675	2.83734	0.01062	0.0799031	NS
mdt-11	0.303897	17.622	2.83498	0.0106747	0.080224	NS
ctns-1	-0.330817	16.9884	-2.83372	0.0107041	0.0803533	NS
raga-1	0.30974	20.22	2.83265	0.010729	0.0804495	NS
ras-2	-0.450782	16.8819	-2.83122	0.0107625	0.0806094	NS
2024-05-01	-0.297474	17.0668	-2.82554	0.0108962	0.0815186	NS
R119.2	0.277058	17.7524	2.82385	0.0109364	0.0817268	NS
fars-2	0.359272	18.8427	2.82296	0.0109576	0.0817518	NS
ubc-6	-0.34118	18.5455	-2.82267	0.0109645	0.0817518	NS
C53B7.3	0.353769	15.8549	2.82165	0.0109889	0.0818337	NS
rhgf-2	-0.371605	16.62	-2.82118	0.0110001	0.0818337	NS
ain-1	-0.669601	19.2931	-2.81936	0.0111005	0.0824874	NS
ZK632.2	0.226405	19.1457	2.81584	0.0111286	0.0826034	NS
C11H1.7	-0.332088	16.4253	-2.81516	0.011145	0.0826324	NS
istr-1	0.278961	19.5988	2.81433	0.0111651	0.0826888	NS
tbh-1	0.614878	21.4814	2.81387	0.0112335	0.0828091	NS
egal-1	-0.395531	16.9517	-2.81179	0.0112269	0.0828091	NS
fitm-2	0.348738	17.0206	2.81162	0.0112311	0.0828091	NS
nstp-4	0.46391	18.4456	2.81143	0.0112575	0.0828091	NS
F17C8.9	0.482036	16.8131	2.81027	0.0112642	0.0828091	NS
cids-1	-0.237045	17.9501	-2.81021	0.0112654	0.0828091	NS
nifk-1	-0.335385	19.4317	-2.81007	0.0112688	0.0828091	NS
C34C6.3	-0.579775	16.4495	-2.8104	0.0113084	0.0829847	NS
cif-1	-0.243305	21.4213	-2.80807	0.0113178	0.0829847	NS
rpoa-2	-0.290138	18.5216	-2.80684	0.0113481	0.0831149	NS
B0495.9	0.469486	19.0494	2.80757	0.0113705	0.0831462	NS
T27A10.6	-0.770508	17.745	-2.80769	0.0113849	0.0831462	NS
H06I04.6	0.31926	16.4134	2.80514	0.0113901	0.0831462	NS
txbp-3	0.379346	16.6714	2.80317	0.011439	0.0834118	NS
ptr-21	-0.547189	16.4765	-2.79954	0.0115661	0.0842286	NS
ceh-44	-0.249569	16.7464	-2.79701	0.011593	0.0842286	NS
nuo-6	-0.451065	17.861	-2.79669	0.0116121	0.0842286	NS
exo-3	0.343892	19.544	2.79621	0.011613	0.0842286	NS
dpyd-1	-0.36504	18.3336	-2.79615	0.0116147	0.0842286	NS
F41B4.3	0.499508	15.6934	2.79646	0.0116559	0.0843645	NS
dct-18	-0.732594	17.1464	-2.79602	0.0116763	0.0843872	NS
gst-20	-0.435941	18.6675	-2.79494	0.0116589	0.0843645	NS
hlh-1	-0.235306	17.187	-2.79279	0.0116994	0.0843872	NS
hsr-9	-0.200455	20.2452	-2.79276	0.0117003	0.0843872	NS
nova-1	-0.332103	18.6941	-2.78808	0.0118197	0.0850112	NS
hrpu-1	-0.22393	17.5896	-2.78806	0.0118202	0.0850112	NS
ncbp-1	-0.249428	20.7049	-2.78786	0.0118253	0.0850112	NS
nduf-5	-0.536698	19.2099	-2.78656	0.0119121	0.0854092	NS
cfz-2	-0.256969	16.4612	-2.78427	0.0119177	0.0854092	NS
scm-1	-0.185262	18.2526	-2.78412	0.0119214	0.0854092	NS
trm-1	-0.203599	19.7045	-2.7837	0.0119323	0.0854092	NS
rbx-1	-0.357256	19.6967	-2.77806	0.0120791	0.0863666	NS
anp-1	-0.3733	15.8681	-2.77674	0.0121136	0.08649	NS
trpp-3	-0.21968	18.057	-2.7764	0.0121224	0.08649	NS
mab-31	-0.390138	16.4845	-2.77589	0.0121359	0.0864925	NS
rpb-9	0.24127	18.0836	2.77234	0.0122296	0.0870129	NS
F54A3.2	0.230848	18.9528	2.77213	0.0122352	0.0870129	NS
cpt-4	-0.506493	16.6094	-2.77202	0.0122522	0.0870403	NS
miga-1	-0.286371	18.5844	-2.77029	0.0122839	0.0871721	NS
atic-1	1.13515	16.1126	2.77094	0.0123268	0.0872897	NS
glp-4	-0.265345	21.734	-2.76907	0.0123163	0.0872897	NS
F25B4.4	0.444367	18.3695	2.76626	0.0124059	0.0877558	NS
coh-1	-0.321786	18.0689	-2.76434	0.0124432	0.0879254	NS
emc-3	-0.296401	19.6244	-2.76315	0.0124751	0.0880569	NS
pcyt-2.1	0.375058	17.5799	2.75962	0.0125707	0.0886378	NS
snrp-27	0.258755	17.2866	2.75803	0.0126141	0.0888486	NS
T20H4.5	-0.929248	17.8593	-2.75792	0.0126781	0.0892047	NS
mrps-28	-0.27965	19.4247	-2.75279	0.0127576	0.0896225	NS
inos-1	-0.235946	20.675	-2.75254	0.0127645	0.0896225	NS
arx-6	-0.172946	20.5488	-2.75109	0.0128047	0.0898096	NS
rde-11	0.367237	17.026	2.74584	0.0129507	0.0907374	NS
T25G3.3	-0.381627	18.1712	-2.74368	0.0130112	0.0910647	NS
tnt-3	-0.522884	18.0639	-2.7438	0.0130598	0.0913083	NS
mtch-1	0.379701	20.4624	2.74123	0.0130803	0.0913552	NS
efhd-1	0.619185	18.327	2.74162	0.0131312	0.0915177	NS
vps-20	-0.2906	17.0467	-2.73963	0.0131253	0.0915177	NS
B0281.5	-0.4215	16.7564	-2.73872	0.0131513	0.0915359	NS
F21D5.5	0.33192	18.7602	2.73778	0.0131781	0.0915359	NS
cpr-5	1.49758	16.1079	2.73861	0.0132168	0.0915359	NS
T13G4.4	0.332924	15.6456	2.73728	0.013192	0.0915359	NS
dom-3	0.24271	17.0692	2.73668	0.0132093	0.0915359	NS
eif-2alpha	0.197219	21.8663	2.7365	0.0132143	0.0915359	NS
fubl-2	-0.186052	20.4154	-2.73556	0.0132411	0.0916088	NS
wrt-1	-0.989557	18.2703	-2.73593	0.0132933	0.0918734	NS
lim-8	-0.553578	17.5385	-2.73484	0.0133144	0.0919237	NS
nol-56	-0.395789	21.8629	-2.73051	0.0134009	0.0924245	NS
nhr-71	-0.479719	16.135	-2.72946	0.0134392	0.092592	NS
F18A11.3	-0.303188	16.6338	-2.72721	0.0134818	0.0927893	NS
pfk-1.1	0.199396	20.5944	2.72592	0.0135193	0.0929502	NS
sgk-1	-0.370438	16.199	-2.72481	0.0135516	0.093076	NS
tmed-4	-0.267038	20.1162	-2.72417	0.0135703	0.0931078	NS
mrps-6	-0.19376	18.5056	-2.72089	0.0136666	0.0936715	NS
F20H11.1	0.244025	15.7287	2.71568	0.0138209	0.0946307	NS
tag-10	0.540829	17.7504	2.71375	0.0139341	0.0953077	NS
abu-12	-0.404928	15.8563	-2.71129	0.013952	0.0953318	NS
ran-1	0.384284	23.7897	2.71002	0.0140084	0.0956184	NS
prx-1	0.526008	16.8442	2.70908	0.0140569	0.0958506	NS
Y75B8A.19	0.350466	17.0427	2.70692	0.0140838	0.0958597	NS
cyn-5	-0.288369	23.3694	-2.70654	0.0140952	0.0958597	NS
ark-1	-0.261191	17.9006	-2.70618	0.0141063	0.0958597	NS
nuaf-3	0.216327	17.4558	2.70585	0.0141162	0.0958597	NS
T07C4.12	0.504372	15.4209	2.70652	0.0141604	0.0960618	NS
C55A6.10	0.771867	15.9664	2.70419	0.0142314	0.0964442	NS
gst-39	0.707999	17.7001	2.70147	0.0143149	0.0969107	NS
F32D8.12	0.974647	16.6325	2.69718	0.0144471	0.0977059	NS
eif-3.H	-0.156967	21.1301	-2.69336	0.0145002	0.097965	NS
Y26E6A.3	0.288998	15.5851	2.69276	0.0145191	0.0979926	NS
clp-4	0.576321	16.958	2.69347	0.014552	0.0981147	NS
F32D1.5	-0.211184	22.3186	-2.69094	0.014576	0.0981566	NS
hum-1	0.196001	17.8704	2.69033	0.014595	0.0981566	NS
par-1	-0.225414	19.5734	-2.69009	0.0146027	0.0981566	NS
hlb-1	-0.342585	17.3615	-2.68839	0.0146558	0.0983377	NS
ddx-27	-0.253537	17.9001	-2.68828	0.0146593	0.0983377	NS
evl-14	0.153533	19.3254	2.68693	0.0147018	0.0985232	NS
phb-1	0.29815	22.9996	2.68596	0.0147326	0.0986298	NS
hpo-32	0.7231	16.867	2.68508	0.0148267	0.0990592	NS
E01A2.2	-0.175837	19.2782	-2.68316	0.0148213	0.0990592	NS
ZC155.4	0.61447	16.1875	2.6839	0.0148641	0.0991778	NS
W10G11.19	0.348919	15.8938	2.68149	0.0148744	0.0991778	NS
gln-1	0.387039	17.0897	2.67389	0.0151191	0.100708	NS
lin-14	-0.616222	16.2256	-2.67407	0.0151799	0.10091	NS
rsp-2	-0.21727	22.128	-2.6726	0.0151609	0.100885	NS
ubh-4	-0.189866	21.4489	-2.67092	0.0152156	0.101045	NS
mboa-2	0.287583	16.9911	2.6695	0.0152618	0.101251	NS
Y53G8AR.5	0.443792	15.9635	2.66825	0.0153188	0.101412	NS
ran-3	0.256553	20.6472	2.66761	0.015324	0.101412	NS
dgn-1	-0.266456	18.3699	-2.66736	0.015332	0.101412	NS
fmo-5	0.319307	16.7589	2.66498	0.0154103	0.101828	NS
T07D4.5	0.674146	16.4922	2.66188	0.0155809	0.102662	NS
lpr-5	-1.10164	18.3086	-2.66091	0.0156131	0.102662	NS
Y42A5A.5	0.360307	17.1568	2.65957	0.01559	0.102662	NS
mif-2	0.568902	19.1736	2.66006	0.0156416	0.102741	NS
apl-1	-0.290321	17.1616	-2.65888	0.015613	0.102662	NS
ZK1098-1	-0.249889	17.8852	-2.65885	0.015614	0.102662	NS
rpl-15	-0.373191	23.8482	-2.65729	0.0156824	0.102907	NS
Y57G11C.31	-0.466475	17.0433	-2.65641	0.0157117	0.102997	NS
spon-1	0.416739	17.7519	2.65439	0.0157636	0.103235	NS
ncx-2.	-0.742413	17.8211	-2.65527	0.0158022	0.103284	NS
clec-266	0.53577	21.1612	2.6547	0.0158216	0.103309	NS
rme-8	0.191939	19.1169	2.65326	0.0158019	0.103284	NS
coq-5	0.199725	18.3318	2.65204	0.0158431	0.103347	NS
C15B12.1	0.267322	15.726	2.64964	0.0159247	0.103777	NS
ZK1307.1	0.535044	19.263	2.65014	0.0159763	0.103909	NS
ubc-25	-0.282416	17.2832	-2.64849	0.015964	0.103909	NS
afmd-2	0.283541	16.3416	2.6435	0.0161349	0.104838	NS
cest-10	0.507729	16.11	2.644	0.0161753	0.104997	NS
grl-16	-1.09596	17.9258	-2.64239	0.0162425	0.105054	NS
Y71H2AM.2	0.3215	18.9369	2.64053	0.0162378	0.105054	NS
Y43B11AR.3	0.210633	16.5723	2.64032	0.016245	0.105054	NS
T22H9.1	-0.209519	16.0315	-2.64025	0.0162476	0.105054	NS
rps-1	-0.214405	24.9821	-2.63897	0.0162919	0.105167	NS
R74.2	-0.770236	16.2665	-2.63991	0.0163287	0.105167	NS
F39C12.1	-0.244038	16.623	-2.63855	0.0163065	0.105167	NS
eat-17	-0.280865	16.9733	-2.63828	0.0163159	0.105167	NS
acn-1	-0.8538	20.0302	-2.63906	0.0163583	0.10522	NS
pigv-1	-0.292656	18.4839	-2.63634	0.0163836	0.10522	NS
flu-2	-0.246762	17.5674	-2.63621	0.0163884	0.10522	NS
rrf-3	0.257187	16.7825	2.63586	0.0164004	0.10522	NS
T03F7.7	-0.442714	16.3011	-2.63505	0.0164331	0.105309	NS
C09E7.8	0.282457	15.7606	2.63456	0.0164461	0.105309	NS
F37A4.1	-0.198137	18.0306	-2.63276	0.0165094	0.105612	NS
Y45F10A.7	-0.447653	15.8179	-2.63199	0.0165788	0.10577	NS
H01G02.1	2.16414	16.871	2.63185	0.0166114	0.10577	NS
bli-4	-0.305175	17.4898	-2.6303	0.0165964	0.10577	NS
B0303.3	0.237185	23.0265	2.63018	0.0166005	0.10577	NS
men-1	0.230005	20.6669	2.6298	0.0166139	0.10577	NS
fre-1	0.585843	17.6238	2.6297	0.0166876	0.106035	NS
drp-1	0.229153	20.8618	2.62812	0.0166737	0.106035	NS
hsp-16.1	2.21099	19.8571	2.62896	0.0167139	0.1061	NS
mog-5	-0.193738	18.9054	-2.62592	0.0167521	0.106175	NS
nfs-1	0.228875	19.2851	2.62576	0.0167578	0.106175	NS
Y50D4C.3	0.179465	18.0204	2.62526	0.0167756	0.106186	NS
eif-3.B	-0.194608	21.7805	-2.62366	0.0168328	0.106447	NS
mvk-1	-0.525687	17.2568	-2.62332	0.0169038	0.106692	NS
F18C12.3	-0.220181	17.3844	-2.62209	0.0168895	0.106692	NS
epg-4	1.10694	16.6356	2.62285	0.016933	0.106774	NS
hxk-3	0.395533	19.1956	2.62035	0.0169691	0.106842	NS
F39H2.3	0.308509	18.7739	2.61969	0.016976	0.106842	NS
tfbm-1	0.26852	17.1959	2.6184	0.0170227	0.107034	NS
K02F3.12	-0.235884	16.1505	-2.6157	0.017121	0.10755	NS
syf-2	-0.222293	18.2237	-2.61452	0.0171642	0.10772	NS
nhr-119	-0.35728	15.9989	-2.6137	0.017194	0.107804	NS
bgal-1	0.267545	17.8369	2.61177	0.0172651	0.108109	NS
C02F5.13	1.53936	16.6992	2.61274	0.0173008	0.108167	NS
rbpl-1	-0.190094	17.8439	-2.61149	0.0172752	0.108109	NS
tlf-1	-0.227405	16.1499	-2.60877	0.0173757	0.108455	NS
W03C9.5	0.826067	16.0174	2.60985	0.0174074	0.108455	NS
T28D6.6	-0.243803	20.2383	-2.60832	0.0173922	0.108455	NS
W09D10.1	-0.199441	18.7695	-2.60777	0.0174124	0.108455	NS
col-117	-0.840832	15.8549	-2.60734	0.0175003	0.1089	NS
cyp-44A1	-0.298693	18.6266	-2.60465	0.0175286	0.108925	NS
Y39A1C.1	-0.235033	15.5866	-2.60442	0.0175372	0.108925	NS
acdh-1	-1.4398	21.5319	-2.60474	0.0175971	0.109194	NS
cox-5A	0.402082	22.0164	2.60245	0.0176543	0.109446	NS
F54B3.1	0.186647	17.0959	2.5986	0.0177555	0.109894	NS
rme-4	-0.28729	17.5068	-2.59849	0.0177596	0.109894	NS
hda-6	0.237983	17.9353	2.59693	0.0178188	0.110157	NS
pot-1	1.00047	16.9836	2.59707	0.0178861	0.110367	NS
F29A7.6	-0.225026	16.5628	-2.59574	0.0178637	0.110332	NS
cytb-5.2	-0.315162	19.1067	-2.59368	0.0179421	0.110609	NS
C33G3.4	-0.24901	18.9072	-2.59226	0.0179963	0.110797	NS
usp-50	0.221406	17.9525	2.59201	0.018006	0.110797	NS
sodh-1	1.41762	17.2714	2.59122	0.0181094	0.111227	NS
copb-2	-0.201641	21.7081	-2.58936	0.0181078	0.111227	NS
aha-1	-0.222247	16.6213	-2.58884	0.0181276	0.111235	NS
lin-53	-0.348677	22.3118	-2.58796	0.0181616	0.111341	NS
attf-4	-0.21743	17.0706	-2.58629	0.0182259	0.111611	NS
wago-4	0.2582	19.2306	2.58594	0.0182395	0.111611	NS
thoc-5	-0.164273	18.961	-2.58387	0.0183198	0.112	NS
yif-1	-0.229538	18.2196	-2.58254	0.0183718	0.112214	NS
rep-1	0.214552	17.1229	2.58141	0.0184158	0.112379	NS
dhs-4	0.308114	16.7737	2.57979	0.0184792	0.112662	NS
rpl-2	-0.242287	25.4446	-2.57769	0.0185616	0.11306	NS
C52G5.2	-0.604543	17.5742	-2.5784	0.018608	0.1132	NS
F36F12.1	-0.539115	16.1305	-2.57744	0.0186358	0.1132	NS
Y76B12C.3	-0.240787	18.8824	-2.57607	0.0186255	0.1132	NS
clk-1	0.289402	17.4782	2.57348	0.0187282	0.113657	NS
R07E3.6	-0.797802	17.2311	-2.57338	0.0188064	0.113945	NS
K07A1.10	-0.193055	17.1942	-2.57142	0.0188101	0.113945	NS
pab-1	-0.177523	23.6658	-2.56405	0.0191061	0.115632	NS
mog-4	-0.205219	18.7878	-2.56329	0.019137	0.115713	NS
ZK858.5	0.263299	16.898	2.56243	0.019172	0.115819	NS
unc-11	0.17457	18.1546	2.5608	0.0192379	0.11591	NS
rab-6.2	-0.256504	18.7391	-2.56077	0.0192393	0.11591	NS
pad-2	0.320744	16.9371	2.56076	0.0192396	0.11591	NS
gst-13	0.695762	17.4571	2.56106	0.0193029	0.116081	NS
C10G8.8	-0.260872	15.7526	-2.55982	0.0192779	0.116036	NS
cdr-4	0.773141	18.37	2.55996	0.0193477	0.116106	NS
ckb-4	0.224253	17.2482	2.55876	0.0193215	0.116087	NS
lin-26	-0.509981	17.6935	-2.55937	0.0193597	0.116106	NS
gst-18	0.815953	18.4271	2.55803	0.0194267	0.116266	NS
dars-1	0.191322	22.5532	2.55619	0.0194266	0.116266	NS
mig-38	-0.191103	18.8985	-2.55589	0.0194391	0.116266	NS
eif-3.L	-0.154703	20.9803	-2.55529	0.019464	0.116309	NS
rga-8	-0.257045	16.8207	-2.55416	0.0195104	0.116482	NS
swm-1	0.379629	15.6383	2.55279	0.0195849	0.116733	NS
sart-3	-0.202779	19.6996	-2.55229	0.0195878	0.116733	NS
ZC373.2	0.884509	16.5336	2.55277	0.0196438	0.116857	NS
coa-6	0.225669	15.5372	2.55155	0.0196184	0.116811	NS
R09H10.5	-0.68685	16.3947	-2.55038	0.0197429	0.11713	NS
egl-27	-0.204546	18.5196	-2.54926	0.0197137	0.11713	NS
psf-1	-0.173815	18.046	-2.54871	0.0197366	0.11713	NS
F52E1.14	-0.250833	15.4404	-2.54812	0.0197612	0.117134	NS
egl-45	-0.15704	22.5574	-2.54668	0.0198213	0.117385	NS
cct-4	-0.238223	20.3748	-2.54529	0.0198797	0.117491	NS
rpl-18	-0.209208	25.182	-2.5445	0.0199129	0.117491	NS
mrpl-37	-0.211816	19.1584	-2.54426	0.0199231	0.117491	NS
tpi-1	0.234257	22.9131	2.54413	0.0199285	0.117491	NS
unc-94	-0.186458	16.403	-2.5441	0.0199298	0.117491	NS
F45E1.2	-0.284465	15.6426	-2.54372	0.0199456	0.117491	NS
ppw-2	0.405174	18.1896	2.54336	0.0199789	0.117582	NS
R144.13	0.240529	16.676	2.54183	0.0200256	0.117753	NS
pdr-1	0.172831	16.2899	2.54122	0.0200514	0.1178	NS
gbh-1	0.558904	16.8769	2.53989	0.0201747	0.118347	NS
F10G2.1	0.583067	16.2147	2.53999	0.0201804	0.118347	NS
C43E11.9	-0.497821	17.0919	-2.5375	0.020271	0.118564	NS
Y55D5A.3	0.504204	16.0819	2.5371	0.0202911	0.118564	NS
C47E12.2	0.298118	24.1639	2.53591	0.0202775	0.118564	NS
gmps-1	0.25702	20.2185	2.5358	0.020282	0.118564	NS
F13B12.1	-0.29337	17.1351	-2.53508	0.0203129	0.118564	NS
#NAME?	0.262154	20.0347	2.5348	0.0203248	0.118564	NS
pigk-1	0.33943	17.9534	2.52844	0.0205996	0.120062	NS
isy-1	-0.201178	18.0693	-2.52574	0.020717	0.12062	NS
T26C5.2	-0.690312	17.1078	-2.52648	0.0207627	0.12062	NS
F26E4.4	-0.194067	15.7286	-2.52442	0.0207746	0.12062	NS
T19C3.2	-0.787916	18.0278	-2.52513	0.0208216	0.12062	NS
F25H9.7	-0.307814	16.5874	-2.52412	0.0207878	0.12062	NS
F18H3.4	-0.382572	17.9267	-2.5238	0.0208021	0.12062	NS
ppfr-2	-0.194251	17.8041	-2.52332	0.0208229	0.12062	NS
Y41E3.1	-0.314237	18.7082	-2.52255	0.020857	0.12066	NS
phf-5	0.297055	19.2063	2.52233	0.0208663	0.12066	NS
srap-1	1.26459	16.2264	2.52109	0.0209992	0.121049	NS
gtap-1	0.294358	16.3308	2.51962	0.0209858	0.121049	NS
F59D12.5	0.320776	16.2656	2.51945	0.0209935	0.121049	NS
F02E9.10	-0.160388	19.2109	-2.51915	0.0210067	0.121049	NS
cah-4	0.560492	15.6942	2.51921	0.0210826	0.121196	NS
rpl-32	-0.169496	23.7677	-2.51738	0.0210851	0.121196	NS
pbo-4	-0.275221	15.5872	-2.51698	0.0211031	0.121196	NS
gtbp-1	-0.172368	23.0741	-2.51693	0.0211054	0.121196	NS
C24B5.4	0.311107	15.9306	2.51626	0.021135	0.121202	NS
jmjd-3.1	-0.224774	15.7732	-2.51608	0.0211431	0.121202	NS
nnt-1	0.486758	16.1376	2.51617	0.0212043	0.121448	NS
T12G3.2	-0.234844	17.2022	-2.51266	0.0212956	0.121865	NS
T04G9.4	-0.316476	17.5983	-2.51133	0.0213555	0.122103	NS
acbp-5	-0.267005	18.161	-2.51061	0.0213879	0.122122	NS
mrps-33	-0.249369	18.3753	-2.51043	0.0213958	0.122122	NS
F33G12.6	-0.219802	15.5781	-2.50924	0.0214497	0.12222	NS
yju-2	-0.248486	17.6533	-2.50923	0.0214498	0.12222	NS
mab-7	-0.816646	17.9545	-2.50911	0.0215348	0.122505	NS
rde-10	-0.281755	16.4315	-2.50731	0.0215369	0.122505	NS
F33A8.7	-0.50517	16.0075	-2.50589	0.0216704	0.123053	NS
gyf-1.1	-0.209267	20.6864	-2.50489	0.0216465	0.123023	NS
F40F8.5	0.440145	17.6906	2.50388	0.0217252	0.123185	NS
ttr-45	0.724227	18.5267	2.50415	0.0217599	0.123185	NS
F01F1.15	0.274673	19.3802	2.50291	0.021737	0.123185	NS
B0280.9	-0.256759	17.3553	-2.50223	0.0217682	0.123185	NS
Y56A3A.22	0.642849	16.9191	2.50223	0.021848	0.123321	NS
dhs-30	0.28413	19.3324	2.50088	0.0218299	0.123321	NS
2O16	-0.233158	18.2176	-2.5005	0.0218472	0.123321	NS
dib-1	0.7131	15.8846	2.5	0.0219502	0.123792	NS
let-653	0.299402	18.7355	2.4928	0.0222036	0.124877	NS
B0564.2	0.294317	17.8845	2.49248	0.0222185	0.124877	NS
ubc-9	0.295348	20.0576	2.49246	0.0222192	0.124877	NS
acs-4	0.158672	22.5303	2.49213	0.022235	0.124877	NS
mif-3	0.379424	17.5794	2.49168	0.0222556	0.124877	NS
rnp-7	-0.197005	19.7669	-2.49131	0.0222732	0.124877	NS
F01G10.9	-0.195183	15.4072	-2.49104	0.0222857	0.124877	NS
T15B12.1	-0.346129	16.1152	-2.4907	0.0223017	0.124877	NS
pmk-1	-0.253717	17.4494	-2.49047	0.0223123	0.124877	NS
npp-21	0.166432	21.0211	2.48905	0.0223788	0.125144	NS
pyp-1.1	1.12021	17.0102	2.488	0.0225093	0.12572	NS
ptrn-1	-0.260959	17.5452	-2.48606	0.0225198	0.12572	NS
mrpl-21	-0.229268	18.1184	-2.48423	0.0226062	0.126096	NS
apy-1	0.422173	19.6445	2.48465	0.0226524	0.126181	NS
ttr-49	0.374679	15.5695	2.48342	0.0226639	0.126181	NS
lnp-1	0.179622	17.9875	2.48224	0.022701	0.126181	NS
ymel-1	0.196485	19.518	2.48224	0.0227011	0.126181	NS
prmt-1	-0.356795	22.8435	-2.48239	0.0227168	0.126181	NS
Y41E3.7	-0.20081	18.7709	-2.48115	0.0227527	0.126275	NS
Y43F8C.7	-0.297021	19.5096	-2.47893	0.022859	0.126758	NS
nol-16	-0.21577	16.592	-2.47833	0.0228875	0.12681	NS
lfe-2	-0.244514	15.6153	-2.4769	0.0229565	0.127086	NS
sqt-3	-0.69109	18.2705	-2.47722	0.0230227	0.127217	NS
F53F1.3	0.299716	16.3217	2.4757	0.023014	0.127217	NS
cogc-8	-0.185142	17.49	-2.47521	0.0230377	0.127217	NS
elpc-3	-0.206092	19.0223	-2.47393	0.0230998	0.127453	NS
let-630	-0.146357	20.2829	-2.47279	0.0231549	0.127651	NS
ddx-17	-0.280462	21.0663	-2.47128	0.0232283	0.127949	NS
T23C6.4	-0.292083	17.8982	-2.47072	0.0232555	0.127992	NS
rom-1	0.312347	17.0043	2.47032	0.0232751	0.127994	NS
pgrn-1	0.355977	16.8596	2.46935	0.0233221	0.128119	NS
ric-8	-0.244745	18.806	-2.46882	0.0233482	0.128119	NS
taf-7.2	-0.258204	16.2936	-2.46866	0.0233558	0.128119	NS
tftc-5	0.363679	15.6906	2.46703	0.0234441	0.128432	NS
unc-120	-0.390523	16.4715	-2.4667	0.0234517	0.128432	NS
gei-13	-0.640867	18.8528	-2.46733	0.0235034	0.128608	NS
Y48A6C.4	-0.202318	16.4471	-2.46386	0.0235917	0.128985	NS
ttr-41	0.604982	17.5419	2.46303	0.0237154	0.129471	NS
M01F1.3	-0.202699	15.8697	-2.46127	0.0237197	0.129471	NS
Y53G8AR.6	-0.144218	19.7941	-2.46077	0.0237445	0.129499	NS
F14H3.6	0.548369	19.4914	2.46102	0.0238151	0.129609	NS
F35E12.2	-0.412381	16.3145	-2.45975	0.0237965	0.129609	NS
prcc-1	-0.272335	16.8209	-2.45919	0.0238232	0.129609	NS
R10H10.7	0.195708	15.9278	2.45843	0.0238609	0.129629	NS
let-526	-0.21429	19.7968	-2.45823	0.023871	0.129629	NS
ZC8.6	-0.204795	18.348	-2.45794	0.0238857	0.129629	NS
gip-1	0.242817	17.5766	2.45456	0.0240547	0.130439	NS
T19B10.5	-0.351975	16.716	-2.45408	0.0240791	0.130445	NS
trap-1	-0.206151	22.3537	-2.45376	0.0240952	0.130445	NS
pxl-1	0.247957	16.0617	2.45321	0.0241225	0.130486	NS
M03B6.3	-0.569473	17.0419	-2.45208	0.0242634	0.131063	NS
K02E10.4	-0.545154	18.0011	-2.45133	0.024301	0.131063	NS
sap-140	0.259192	16.2073	2.4498	0.0242951	0.131063	NS
acl-2	0.239095	17.2424	2.44954	0.0243083	0.131063	NS
M57.2	0.219624	19.9077	2.449	0.0243354	0.131102	NS
R57.2	-0.558592	16.6247	-2.449	0.024412	0.131311	NS
fasn-1	-0.444834	21.6991	-2.44871	0.0244267	0.131311	NS
F59A2.5	0.71074	17.9319	2.44858	0.024441	0.131311	NS
mpdu-1	3.69796	19.7405	2.44817	0.0244618	0.131311	NS
bed-1	0.245212	17.1217	2.44604	0.0244865	0.131311	NS
F10G7.10	-0.141912	17.9582	-2.44591	0.0244931	0.131311	NS
skr-15	0.752795	17.2854	2.44633	0.0245556	0.131335	NS
cest-35.1	0.472973	16.5339	2.44586	0.0245414	0.131335	NS
immp-2	-0.200496	16.5169	-2.44466	0.024557	0.131335	NS
pid-2	0.755603	15.6762	2.44476	0.024636	0.131559	NS
rpl-20	-0.312214	24.724	-2.44307	0.0246388	0.131559	NS
test-1	-0.363198	17.3211	-2.44257	0.0246643	0.131589	NS
W02G9.3	0.244242	18.1607	2.44181	0.0247032	0.131589	NS
ech-2	0.169575	19.1364	2.4418	0.024704	0.131589	NS
K02F3.2	0.248477	19.7524	2.43964	0.0248153	0.132075	NS
sqst-1	0.292079	17.5596	2.43868	0.0248654	0.132236	NS
pmk-3	0.136544	15.7504	2.4368	0.0249626	0.132609	NS
trpp-4	0.173979	17.7547	2.43655	0.0249756	0.132609	NS
sft-4	-0.289672	19.1086	-2.43564	0.0250234	0.132756	NS
lpr-3	-0.545076	20.3562	-2.4357	0.0251052	0.132977	NS
Y54H5A.1	-0.321839	18.3346	-2.43466	0.0250746	0.132922	NS
col-107	-1.00185	16.7771	-2.43501	0.0251408	0.133059	NS
dhs-5	0.52693	17.6174	2.43341	0.0252249	0.133258	NS
lec-2	1.08589	16.8048	2.43315	0.0252387	0.133258	NS
prp-8	-0.171809	20.8156	-2.43162	0.0252334	0.133258	NS
F10E7.5	-0.262823	18.0353	-2.43083	0.0252751	0.133344	NS
B0272.3	0.255569	20.9496	2.4294	0.0253508	0.133637	NS
F26H9.2	-0.180771	15.9969	-2.42874	0.0253856	0.133714	NS
ZK1098.3	-0.196869	16.9578	-2.42833	0.0254072	0.133721	NS
Y71H2AM.4	-0.413041	17.0821	-2.42651	0.0255049	0.133932	NS
tra-4	-0.243302	18.2418	-2.42645	0.025507	0.133932	NS
hmt-1	0.201042	17.9658	2.42643	0.025508	0.133932	NS
erg-28	-0.223434	15.8894	-2.42593	0.0255344	0.133935	NS
klo-1	0.287075	15.9071	2.42565	0.025549	0.133935	NS
sod-5	1.03615	17.2078	2.42534	0.0256512	0.134365	NS
C38H2.2	-0.385102	16.3877	-2.42277	0.0257028	0.13448	NS
H06H21.11	-0.308151	15.498	-2.42256	0.025714	0.13448	NS
crn-1	0.295786	19.5048	2.42166	0.0257622	0.134626	NS
Y56A3A.7	-0.59608	18.7093	-2.42159	0.025852	0.134705	NS
adsl-1	0.216695	20.6119	2.42019	0.0258412	0.134705	NS
F41G3.3	-0.204631	15.4236	-2.42015	0.0258434	0.134705	NS
sna-1	-0.248065	16.6413	-2.41986	0.0258586	0.134705	NS
tpa-1	0.363218	16.0266	2.41714	0.0260056	0.135166	NS
mrpl-54	-0.22502	17.9156	-2.41712	0.0260065	0.135166	NS
vhp-1	0.31596	16.243	2.41709	0.0260084	0.135166	NS
K04A8.1	-0.388973	16.4499	-2.41603	0.0260653	0.135356	NS
taf-8	-0.379567	16.578	-2.41415	0.0261675	0.13578	NS
gst-42	0.613455	18.4334	2.41395	0.0262648	0.136071	NS
txdc-17	0.319252	20.0401	2.41247	0.0262591	0.136071	NS
cuc-1	0.667459	19.3412	2.41284	0.0263257	0.136071	NS
rig-1	1.60178	15.8433	2.41267	0.0263349	0.136071	NS
F53F1.2	0.323801	19.8337	2.41103	0.0263374	0.136071	NS
rpl-10	-0.276539	24.6544	-2.41077	0.0263517	0.136071	NS
F15B10.3	-0.343191	17.1889	-2.41048	0.0263675	0.136071	NS
lsy-2	-0.351192	16.8132	-2.40972	0.0264096	0.13618	NS
cap-1	-0.219019	21.0767	-2.40935	0.0264298	0.13618	NS
vps-24	0.531295	17.8435	2.40951	0.0265076	0.136369	NS
rbm-17	0.37191	16.9683	2.4086	0.0264707	0.136285	NS
tag-322	-0.152433	17.8471	-2.39994	0.0269508	0.138542	NS
pan-1	0.369126	17.1386	2.39869	0.027021	0.138794	NS
sph-1	0.356608	18.113	2.39734	0.0270966	0.138913	NS
set-19	-0.272552	16.1526	-2.39724	0.0271021	0.138913	NS
magu-4	-0.209265	16.2031	-2.39715	0.027107	0.138913	NS
ahcy-1	0.243531	24.3971	2.39663	0.0271365	0.138957	NS
mrt-1	0.370353	17.012	2.3958	0.0271833	0.139088	NS
C09F9.2	-0.430328	20.0664	-2.39628	0.0272326	0.139195	NS
W08F4.3	0.30105	20.1934	2.39468	0.0272462	0.139195	NS
math-20	0.43481	15.6942	2.39512	0.0272952	0.139231	NS
Y57A10A.8	-0.232168	15.6928	-2.39418	0.0272745	0.139231	NS
unc-6	-0.205011	16.1487	-2.39274	0.0273559	0.139433	NS
F25B4.7	0.205699	17.3019	2.39165	0.0274179	0.139642	NS
ilcr-2	-0.238499	17.3407	-2.39127	0.0274392	0.139643	NS
vbh-1	-0.304478	20.8453	-2.39006	0.0275083	0.139887	NS
nduf-7	-0.893331	20.0572	-2.38988	0.0276071	0.140252	NS
Y37H2A.1	0.380429	20.3697	2.38843	0.0276468	0.140252	NS
dnj-7	-0.318378	19.6602	-2.38764	0.0276462	0.140252	NS
unc-57	0.184892	18.5938	2.3872	0.0276717	0.140252	NS
cyl-1	0.261059	17.0188	2.38671	0.0276994	0.140252	NS
rpl-5	-0.177452	25.2948	-2.38658	0.0277073	0.140252	NS
ned-8	0.299076	20.0481	2.38614	0.0277324	0.140272	NS
F52E4.5	0.936319	17.0216	2.38615	0.0278206	0.140611	NS
F36A2.7	0.474246	21.8396	2.38453	0.027914	0.140942	NS
F44E2.3	-0.210705	17.3668	-2.38273	0.0279287	0.140942	NS
tppp-1	0.473475	19.904	2.38296	0.0280043	0.140975	NS
skr-3	0.62338	16.1141	2.38268	0.0280204	0.140975	NS
R08E3.3	-0.247712	16.7958	-2.38161	0.0279934	0.140975	NS
F22G12.4	0.1789	23.6386	2.38138	0.028007	0.140975	NS
shc-2	-0.159432	15.636	-2.38023	0.0280736	0.141111	NS
ZK1236.1	0.242993	16.2381	2.37994	0.0280901	0.141111	NS
hsp-16.48	1.93523	17.8403	2.38015	0.0281674	0.141225	NS
smg-9	0.23074	17.895	2.37897	0.0281468	0.141225	NS
plc-4	0.197027	16.718	2.37846	0.0281767	0.141225	NS
F25B5.5	-0.284572	17.5196	-2.37711	0.0282551	0.141511	NS
gba-3.1	0.27931	16.1348	2.37346	0.0284689	0.142474	NS
T23H2.3	0.232692	18.3849	2.37166	0.0285751	0.142897	NS
ZK809.3	-0.402884	20.7038	-2.37112	0.0286816	0.143322	NS
C16A3.6	-0.362678	16.7327	-2.36925	0.0287177	0.143331	NS
lbp-6	1.2033	19.9528	2.36991	0.0287686	0.143431	NS
coa-7	0.215637	19.291	2.3691	0.0287268	0.143331	NS
K10C3.4	0.365398	18.0968	2.3635	0.0290615	0.144783	NS
cdc-5l	-0.222971	19.433	-2.3619	0.0291567	0.145148	NS
zipt-15	0.509735	17.196	2.36079	0.0293021	0.145762	NS
sod-3	0.658044	17.4663	2.35983	0.0293716	0.145779	NS
rict-1	0.22978	17.0304	2.35885	0.0293406	0.145779	NS
T19C3.5	0.354027	18.0393	2.35866	0.0293521	0.145779	NS
B0024.11	-0.204924	17.9678	-2.35581	0.029525	0.146431	NS
C08B11.9	-0.291638	18.1768	-2.35506	0.0295707	0.146547	NS
Y57G11C.43	0.205184	18.2234	2.35166	0.0297786	0.147468	NS
E04F6.9	1.36393	16.9673	2.34993	0.0299763	0.148335	NS
F10D11.2	0.3562	16.4434	2.34653	0.0300944	0.148809	NS
twk-18	-0.542035	16.68	-2.34642	0.0301842	0.149142	NS
rps-17	-0.218859	23.8996	-2.34305	0.0303109	0.149656	NS
F12F6.1	-0.206248	19.8546	-2.33824	0.0306122	0.151031	NS
rei-2	-0.244943	15.8489	-2.33765	0.0306489	0.151093	NS
trpa-1	0.252824	15.8811	2.33731	0.0306705	0.151093	NS
gly-7	-0.248485	18.5013	-2.33626	0.0307365	0.151306	NS
cyn-16	0.221217	17.9003	2.33543	0.0307894	0.151454	NS
igcm-3	-0.405708	17.7725	-2.33548	0.0308237	0.15151	NS
pdhk-2	0.201809	18.259	2.33318	0.030932	0.151894	NS
rfk-1	0.273584	17.4439	2.33293	0.0309478	0.151894	NS
Y71G12B.10	0.283479	18.9131	2.3315	0.0310385	0.152221	NS
F54D8.6	-0.207443	18.1521	-2.33116	0.0310603	0.152221	NS
pars-1	-0.198602	21.6263	-2.33066	0.031092	0.152264	NS
tomm-20	-0.27177	20.866	-2.32956	0.0311627	0.152465	NS
unc-26	0.161592	17.8974	2.3293	0.0311792	0.152465	NS
Y75B8A.8	-0.191409	17.814	-2.32815	0.031253	0.152713	NS
Y71H2AM.15	-0.574753	17.6782	-2.32822	0.0313415	0.15292	NS
Y76A2B.5	0.243507	16.1658	2.327	0.031327	0.15292	NS
zhit-3	-0.256211	18.0791	-2.32604	0.0313887	0.153037	NS
sdz-27	0.454574	17.2865	2.32541	0.031505	0.153379	NS
R10E12.2	-0.145458	15.506	-2.32482	0.0314673	0.153308	NS
F08G2.4	0.194416	15.6837	2.32351	0.0315514	0.153432	NS
lin-35	-0.160411	18.6558	-2.32333	0.0315632	0.153432	NS
mog-3	-0.186525	17.8786	-2.32263	0.0316084	0.153432	NS
ergo-1	-0.295537	20.2137	-2.32263	0.0316087	0.153432	NS
grl-5	-0.675906	17.1186	-2.3223	0.0317235	0.153818	NS
lgmn-1	0.792278	18.9785	2.32186	0.0317519	0.153818	NS
sup-1	1.29017	17.8953	2.32177	0.0317579	0.153818	NS
nab-1	-0.510067	18.664	-2.32101	0.0318073	0.153945	NS
T04B8.5	-0.237064	17.5494	-2.31826	0.0318935	0.154249	NS
smcr-8	0.745365	16.811	2.31861	0.0319641	0.154252	NS
T23F11.4	-0.228715	16.4087	-2.3175	0.031943	0.154252	NS
T10B10.3	0.241063	17.2554	2.31724	0.0319598	0.154252	NS
ZK154.4	-0.366119	16.6645	-2.31599	0.0320421	0.154512	NS
K06H7.2	0.725863	17.2647	2.31636	0.0321112	0.154512	NS
grh-1	-0.475755	16.6085	-2.31616	0.0321073	0.154512	NS
R08D7.1	-0.216921	17.9611	-2.31517	0.0320959	0.154512	NS
rpac-40	-0.198457	19.6395	-2.31142	0.0323434	0.155516	NS
lbp-7	1.25703	16.7394	2.31151	0.0324314	0.155713	NS
gly-11	-0.22306	17.8352	-2.31041	0.03241	0.155713	NS
egl-18	-0.283088	17.7147	-2.30751	0.0326027	0.156368	NS
hil-4	-0.26471	18.698	-2.30733	0.0326151	0.156368	NS
teg-4	0.1111	20.686	2.30674	0.0326545	0.156444	NS
rps-11	-0.263852	24.0768	-2.3054	0.0327442	0.156749	NS
pnk-1	0.218813	17.763	2.30508	0.0327655	0.156749	NS
rbm-12	-0.150597	17.8014	-2.30401	0.0328371	0.156978	NS
T09B4.2	0.297115	17.7648	2.30262	0.0329302	0.15731	NS
swsn-6	-0.140687	21.4177	-2.30048	0.0330746	0.157885	NS
dhhc-8	-0.139871	16.7235	-2.29767	0.0332651	0.15868	NS
C16C2.4	-0.209237	16.7536	-2.29689	0.0333186	0.158821	NS
mrps-34	-0.241787	17.0264	-2.2961	0.0333723	0.158963	NS
arx-5	0.19815	17.8069	2.29541	0.0334192	0.159072	NS
aagr-2	0.340275	19.8718	2.29507	0.033465	0.159175	NS
let-858	-0.166918	19.9989	-2.29394	0.0335199	0.15923	NS
C18A3.3	-0.247913	18.2219	-2.29362	0.0335418	0.15923	NS
nkcc-1	-0.213319	16.2906	-2.29352	0.0335486	0.15923	NS
cap-2	-0.253068	18.8781	-2.29253	0.0336164	0.159245	NS
dur-1	1.22132	16.2364	2.29317	0.0336682	0.159245	NS
dnj-13	-0.154805	20.4263	-2.29234	0.0336293	0.159245	NS
B0507.1	-0.45895	16.6512	-2.29248	0.0336962	0.159245	NS
rpl-1	-0.281078	23.2387	-2.2915	0.0336869	0.159245	NS
dnj-24	-0.358786	16.091	-2.29143	0.0336922	0.159245	NS
ugt-45	-0.299502	17.3209	-2.29074	0.0337396	0.159282	NS
ttr-6	0.334868	18.9522	2.29057	0.0337522	0.159282	NS
ekl-6	-0.150962	19.0163	-2.29004	0.0337875	0.159336	NS
eat-3	-0.197645	19.2845	-2.28601	0.0340667	0.160375	NS
F57C9.4	0.17636	17.8264	2.28588	0.0340756	0.160375	NS
F56D3.1	-0.97071	18.8562	-2.2863	0.0341424	0.160375	NS
cus-2	0.240886	17.4646	2.2856	0.0340952	0.160375	NS
rab-7	0.175785	20.9112	2.28513	0.0341276	0.160375	NS
spin-1	-0.365425	15.8836	-2.28509	0.0341533	0.160375	NS
fhod-1	-0.219368	15.7288	-2.2843	0.0341851	0.160396	NS
C53D5.1	-0.206306	15.6832	-2.284	0.0342062	0.160396	NS
glh-2	-0.288575	18.329	-2.28239	0.034319	0.160788	NS
epn-1	-0.230361	19.7981	-2.28211	0.0343384	0.160788	NS
B0393.5	-0.554251	17.1389	-2.28247	0.0344094	0.16093	NS
nsun-2	-0.151231	20.275	-2.28066	0.03444	0.16093	NS
C54E10.6	-0.16985	15.8516	-2.28064	0.0344416	0.16093	NS
rps-9	-0.160106	24.8143	-2.27988	0.0344948	0.161065	NS
mlt-8	-0.610765	19.5433	-2.27995	0.0345864	0.161225	NS
cec-3	-0.209508	18.3238	-2.27906	0.0345525	0.161221	NS
syd-2	-0.290862	17.7739	-2.27835	0.0346021	0.161225	NS
Y95D11A.3	0.337912	15.297	2.27758	0.0347092	0.161521	NS
stau-1	-0.196027	16.7854	-2.27676	0.0347144	0.161521	NS
cchl-1	-0.326472	19.4725	-2.27547	0.0348057	0.161638	NS
F26E4.7	0.374251	15.9119	2.27554	0.0348235	0.161638	NS
F26F2-7	0.354714	16.1333	2.27516	0.0348276	0.161638	NS
idha-1	0.157359	21.8961	2.27503	0.0348372	0.161638	NS
Y47D9A.1	0.262351	18.6117	2.27446	0.0348775	0.161711	NS
snr-2	-0.149984	22.6681	-2.27315	0.0349705	0.162029	NS
lpr-4	-0.714913	19.4227	-2.27267	0.0351018	0.16241	NS
ipla-1	0.194121	17.3727	2.27176	0.0350698	0.162376	NS
snrp-40.1	-0.295811	18.8157	-2.27083	0.0351361	0.162418	NS
daf-25	-0.153588	18.7436	-2.27059	0.0351529	0.162418	NS
map-2	0.266996	20.4589	2.27026	0.035177	0.162418	NS
ZK643.5	-0.196476	18.4862	-2.2691	0.0352599	0.162687	NS
C45B2.6	0.203447	16.3431	2.26715	0.0354003	0.163109	NS
utx-1	-0.178728	17.8718	-2.26714	0.0354005	0.163109	NS
pign-1	-0.15398	17.0772	-2.26496	0.0355576	0.163718	NS
rrc-1	-0.413088	16.5574	-2.2607	0.0358903	0.165135	NS
ret-1	-0.370101	15.5716	-2.26055	0.035956	0.165323	NS
pfd-3	-0.220208	19.4387	-2.25683	0.0361501	0.1661	NS
C25E10.5	0.375356	15.6868	2.25715	0.0361891	0.166164	NS
tcer-1	-0.159	20.4269	-2.25571	0.0362319	0.166245	NS
gyf-1	0.990968	15.8366	2.25604	0.036306	0.16647	NS
pnp-1	0.387366	19.492	2.25507	0.0363592	0.166512	NS
serr-1	0.389344	17.7911	2.25441	0.0363655	0.166512	NS
K03B4.1	0.193446	18.2562	2.25335	0.0364063	0.166583	NS
ZC374.2	-0.716486	18.8835	-2.25385	0.0364677	0.166687	NS
C30F12.2	0.161393	16.134	2.25231	0.0364826	0.166687	NS
ire-1	-0.179066	18.0528	-2.25202	0.0365046	0.166687	NS
clec-91	-1.65384	21.5609	-2.25178	0.036621	0.166989	NS
tth-1	0.368509	20.533	2.25157	0.0366138	0.166989	NS
dpy-22	-0.167611	17.199	-2.24979	0.0366697	0.167096	NS
glf-1	-0.767272	19.1478	-2.24759	0.0369329	0.168064	NS
sdhb-1	0.156141	21.4869	2.2469	0.0368851	0.167962	NS
msa-1	0.728691	16.8639	2.24647	0.0370168	0.168074	NS
dnpp-1	0.208117	19.539	2.24544	0.0369949	0.168074	NS
rack-1	-0.454485	23.327	-2.24594	0.037056	0.168074	NS
set-10	-0.235634	17.5933	-2.24488	0.0370363	0.168074	NS
gtf-2e1	-0.253023	18.4356	-2.24454	0.037062	0.168074	NS
szy-5	0.898424	16.5324	2.24455	0.0371602	0.168373	NS
Y54G9A.9	1.49451	17.2102	2.24397	0.0372043	0.168373	NS
Y69A2AR.1	0.161781	17.8147	2.24299	0.0371788	0.168373	NS
chs-1	-0.824477	18.4862	-2.24335	0.0372511	0.168378	NS
cul-2	-0.199044	19.534	-2.24196	0.0372562	0.168378	NS
nfyb-1	-0.306876	18.0102	-2.24072	0.0373496	0.168684	NS
vit-4	-0.744601	26.6686	-2.24061	0.0374574	0.168924	NS
mrps-27	-0.150658	19.3883	-2.23934	0.037454	0.168924	NS
M05D6.5	0.248524	16.7961	2.23888	0.0374894	0.168924	NS
sec-16a.2	-0.167521	18.1856	-2.23868	0.0375046	0.168924	NS
eftu-2	-0.195042	21.5468	-2.23674	0.0376521	0.169445	NS
ears-2	0.19757	16.1939	2.23648	0.0376714	0.169445	NS
cisd-1	0.241733	21.3922	2.23582	0.0377216	0.16953	NS
ttc-1	0.267551	17.2704	2.23556	0.0377416	0.16953	NS
mvk-1	0.155379	18.966	2.23504	0.0377819	0.169596	NS
F54B8.4	0.725568	15.8614	2.23481	0.0378992	0.169892	NS
ZK792.1	-0.215031	17.4272	-2.23352	0.0378981	0.169892	NS
nhr-10	-0.182305	17.0558	-2.23256	0.0379712	0.1701	NS
ech-1.1	0.64952	17.7035	2.23311	0.0380293	0.170132	NS
cdc-48.3	0.197513	20.766	2.23174	0.0380347	0.170132	NS
tag-96	-0.310946	18.0962	-2.23147	0.0380554	0.170132	NS
T22F7.3	-0.186683	15.885	-2.23036	0.0381408	0.170398	NS
ltah-1.1	0.27607	19.8699	2.22926	0.0382259	0.170663	NS
rps-4	-0.160868	25.5235	-2.22876	0.0382641	0.170719	NS
D2063.1	0.63016	16.2523	2.22768	0.038448	0.171424	NS
T24H10.1	-0.178436	21.238	-2.2253	0.0385325	0.171685	NS
rab-39	0.216578	17.4657	2.22439	0.0386034	0.171885	NS
C53H9.2	-0.171697	19.016	-2.22401	0.038633	0.171901	NS
F08F8.7	0.518512	18.5373	2.22296	0.0388162	0.172309	NS
pod-2	-0.359445	18.2583	-2.22243	0.0387804	0.172309	NS
ttyh-1	-0.421171	16.9292	-2.22219	0.0388164	0.172309	NS
cku-70	0.173615	19.7922	2.22151	0.0388288	0.172309	NS
pole-4	0.489164	20.095	2.2211	0.0389618	0.172703	NS
W03A5.6	-0.218401	18.2768	-2.21971	0.0389697	0.172703	NS
cct-3	-0.22091	22.4391	-2.21888	0.0390351	0.172877	NS
algn-13	-0.188436	17.1169	-2.21826	0.0390835	0.172976	NS
C44B7.5	0.442869	20.5036	2.21837	0.0391764	0.17304	NS
ZK1055.7	0.961477	17.2412	2.21799	0.0392064	0.173057	NS
eak-7	0.159493	19.7163	2.21734	0.0391565	0.17304	NS
cope-1	-0.149142	21.2067	-2.21728	0.0391614	0.17304	NS
ras-1	0.49683	17.3973	2.2171	0.0392771	0.173109	NS
Y32H12A.8	-0.177807	17.4549	-2.21596	0.0392658	0.173109	NS
ostb-1	-0.145875	22.5237	-2.21557	0.0392965	0.173109	NS
ccg-1	0.857398	19.6738	2.21593	0.0393696	0.1732	NS
mrps-16	-0.180262	20.0838	-2.21489	0.0393504	0.1732	NS
prp-19	-0.184516	21.7394	-2.21166	0.0396076	0.174131	NS
ephx-1	-0.185958	15.4591	-2.21053	0.0396973	0.17441	NS
lir-1	-0.230753	15.9069	-2.20807	0.0398952	0.175163	NS
sac-2	-0.150601	16.6934	-2.20754	0.0399372	0.175231	NS
taf-4	-0.147423	17.3426	-2.20696	0.0399841	0.175321	NS
Y71H2AM.6	0.325873	17.211	2.20554	0.0400988	0.175689	NS
C33A12.1	-0.483696	20.7023	-2.20554	0.0402008	0.175689	NS
enol-1	0.205587	23.7047	2.20473	0.0401637	0.175689	NS
C03B1.7	0.273003	16.5632	2.20454	0.0401796	0.175689	NS
C49C3.6	0.286183	16.2659	2.2045	0.0401822	0.175689	NS
cua-1	0.191605	17.3563	2.20389	0.0402322	0.175711	NS
exc-7	-0.293412	16.6177	-2.20314	0.0402927	0.175859	NS
rpac-19	-0.300345	18.0456	-2.19936	0.0406005	0.177024	NS
tsen-54	0.201318	15.9943	2.19901	0.0406289	0.177024	NS
F19B6.1	-0.175679	19.4968	-2.19887	0.0406398	0.177024	NS
plst-1	0.333572	20.1444	2.19649	0.0408592	0.177687	NS
sur-2	-0.173518	17.297	-2.19635	0.0408461	0.177687	NS
aph-1	0.190583	17.0344	2.19603	0.0408726	0.177687	NS
ifb-1	-0.549553	18.9962	-2.19579	0.0409951	0.178103	NS
C33D9.8	0.43696	16.0343	2.19469	0.0410721	0.17832	NS
hgrs-1	0.128923	19.7324	2.19193	0.0412103	0.178803	NS
ttr-48	0.665251	18.8619	2.19192	0.0413143	0.179016	NS
F53B3.5	-0.276602	19.4337	-2.19121	0.0412707	0.178948	NS
R12C12.5	-0.176843	17.426	-2.19037	0.0413404	0.179016	NS
tub-2	-0.263344	15.9715	-2.1895	0.0414126	0.179211	NS
pcca-1	0.185686	21.6319	2.18813	0.0415262	0.179585	NS
sams-1	-0.758661	19.9222	-2.18774	0.041662	0.17982	NS
mtg-1	0.281133	16.8165	2.18664	0.0416508	0.17982	NS
Y111B2A.12	-0.265006	17.2306	-2.18661	0.0416533	0.17982	NS
fard-1	-0.417809	17.072	-2.18455	0.0418873	0.180675	NS
wdr-12	-0.387956	18.6327	-2.1831	0.0420331	0.181186	NS
gsk-3	0.179286	20.2265	2.18126	0.0421024	0.181366	NS
wars-1	0.227757	20.8476	2.17918	0.0422781	0.182005	NS
unc-132	0.480492	17.4912	2.17952	0.0423538	0.182212	NS
blos-2	0.421795	16.6955	2.1778	0.0424494	0.182386	NS
oxy-4	0.290995	19.1786	2.17722	0.0424448	0.182386	NS
cnt-2	-0.166393	17.6495	-2.1743	0.0426937	0.183317	NS
vha-19	-0.222854	19.3646	-2.17308	0.0427975	0.183644	NS
C36A4.4	0.286949	19.8273	2.17275	0.0428261	0.183647	NS
lec-4	1.24564	16.813	2.17298	0.0429111	0.183893	NS
vit-5	-0.621696	25.766	-2.17193	0.0430008	0.18392	NS
pfkb-1.2	0.170521	16.8333	2.17118	0.0429606	0.183895	NS
gars-1	-0.186404	22.391	-2.17111	0.0429671	0.183895	NS
C45G9.2	0.532891	16.6278	2.17148	0.0430395	0.183967	NS
riok-1	-0.185682	18.2809	-2.16788	0.0432456	0.184649	NS
aly-2	-0.174395	19.4789	-2.16768	0.0432628	0.184649	NS
Y43F8C.6	0.228559	17.4562	2.16733	0.0432931	0.184649	NS
obr-3	-0.161136	17.0955	-2.16713	0.0433107	0.184649	NS
cmd-1	-0.329785	21.5111	-2.16607	0.043442	0.184899	NS
pcn-1	0.243442	23.0748	2.16557	0.0434458	0.184899	NS
C49H3.4	0.258151	15.7349	2.16548	0.043453	0.184899	NS
F07F6.4	-0.157385	20.3253	-2.16441	0.0435467	0.18511	NS
cfim-1	-0.14389	19.9032	-2.16427	0.0435587	0.18511	NS
algn-12	0.290798	16.3017	2.16245	0.0437169	0.185664	NS
R102-4	0.435628	17.558	2.16264	0.0437891	0.185851	NS
ugt-48	-0.32519	16.4103	-2.1598	0.0439491	0.186175	NS
F28E10.1	-0.206269	15.4087	-2.15946	0.0439791	0.186175	NS
math-33	-0.405843	16.661	-2.15957	0.0440061	0.186175	NS
F33G12.7	-0.250302	16.0208	-2.15937	0.0439869	0.186175	NS
thoc-3	0.175383	17.6734	2.15928	0.0439954	0.186175	NS
uaf-2	-0.140455	19.5238	-2.15843	0.0440699	0.186326	NS
lpd-2	-0.256056	16.0233	-2.15614	0.0442719	0.187061	NS
ttr-51	0.448391	20.1414	2.15534	0.0444483	0.187686	NS
mdt-27	-0.19735	17.2063	-2.15353	0.0445023	0.187795	NS
R02D5.8	0.197048	16.3708	2.15196	0.0446427	0.188222	NS
tag-267	-0.277673	17.4591	-2.15111	0.0447182	0.188222	NS
C27H6.8	-0.234965	19.6185	-2.15105	0.0447231	0.188222	NS
Y47G6A.7	-0.157916	15.7507	-2.15099	0.0447292	0.188222	NS
vps-22	0.174579	17.1543	2.1508	0.0447458	0.188222	NS
Y94H6A.7	0.312933	17.2526	2.14949	0.0448624	0.188581	NS
clpp-1	0.208011	18.4182	2.14921	0.044888	0.188581	NS
atg-5	0.221062	17.9167	2.14741	0.0450495	0.189139	NS
taf-12	-0.154445	16.4627	-2.14672	0.0451109	0.189277	NS
atz-1	-0.527401	16.8289	-2.14675	0.045215	0.189474	NS
ugt-23	-0.255025	18.7815	-2.14579	0.0451945	0.189474	NS
W05B5.1	-0.503779	17.1145	-2.14544	0.0453328	0.189794	NS
appg-1	0.579367	15.8041	2.14516	0.0453582	0.189794	NS
C18B2.5	-0.791224	17.345	-2.14415	0.0454491	0.189794	NS
fubl-3	-0.216875	19.2946	-2.14323	0.0454253	0.189794	NS
cyn-8	-0.18698	18.77	-2.14271	0.0454728	0.189794	NS
mbk-2	-0.285557	18.5831	-2.14247	0.0454943	0.189794	NS
gck-1	0.121633	18.8207	2.14234	0.0455062	0.189794	NS
K07C5.3	0.199039	17.4115	2.14199	0.0455379	0.189794	NS
sql-1	-0.14629	17.9012	-2.14186	0.0455495	0.189794	NS
C53H9.3	0.253755	18.0076	2.14101	0.0456269	0.189972	NS
tpst-1	-0.211088	18.1355	-2.14076	0.0456494	0.189972	NS
tomm-22	-0.467912	20.2583	-2.1408	0.0457526	0.190281	NS
snr-7	-0.27894	17.885	-2.1392	0.045792	0.190326	NS
cth-2	0.543386	18.3622	2.13935	0.0458843	0.19047	NS
dod-18	0.316006	17.9573	2.13835	0.0458692	0.19047	NS
dnj-27	-0.269794	18.9504	-2.13586	0.0460967	0.191232	NS
T19A6.1	-0.415941	18.1854	-2.13613	0.0461649	0.191331	NS
dve-1	-0.299694	17.3718	-2.13497	0.0461784	0.191331	NS
F36D3.1	-0.260943	17.7516	-2.13433	0.0462369	0.191454	NS
F38A1.8	-0.140982	19.9136	-2.13397	0.0462703	0.191472	NS
ztf-6	0.227	18.4061	2.13248	0.0464077	0.191921	NS
nmrk-1	0.265415	16.3689	2.13005	0.0466324	0.19266	NS
F13D12.9	-0.194766	15.7324	-2.12991	0.0466447	0.19266	NS
arl-5	0.198889	17.441	2.12784	0.0468374	0.193336	NS
C34C12.6	-0.541162	18.2384	-2.12698	0.0470249	0.19364	NS
sur-7	-0.229758	16.4727	-2.12628	0.0469828	0.19364	NS
rpl-11.1	-0.166926	23.4664	-2.12612	0.0469975	0.19364	NS
lipl-7	0.350312	18.4279	2.12617	0.047034	0.19364	NS
C49H3.3	-0.397977	17.7564	-2.12627	0.0470708	0.19364	NS
sut-2	-0.153699	18.9124	-2.12493	0.0471089	0.19364	NS
wnk-1	-0.147563	17.4619	-2.12485	0.0471159	0.19364	NS
bath-40	-0.309193	17.0855	-2.12358	0.0472351	0.19401	NS
erm-1	0.725685	18.7186	2.12404	0.0473	0.194035	NS
F46H5.4	-0.201496	16.4469	-2.12298	0.0472907	0.194035	NS
K10C3.5	0.345677	18.5039	2.12293	0.0473319	0.194046	NS
M142.5	-0.150767	21.0929	-2.12108	0.0474695	0.19449	NS
ZC434.4	-0.21293	17.2512	-2.12069	0.0475068	0.194522	NS
syd-9	-0.404537	17.7603	-2.12072	0.0475935	0.194757	NS
T21D12.12	0.412512	15.4542	2.12046	0.0476362	0.194779	NS
C06E7.88	-0.681307	18.0515	-2.11981	0.0476972	0.194779	NS
ZK265.7	1.1093	16.6169	2.11928	0.0477475	0.194779	NS
spl-3	0.281482	17.504	2.11803	0.0477572	0.194779	NS
nhl-2	0.141958	18.6295	2.11786	0.047774	0.194779	NS
lst-4	0.179798	17.6088	2.11784	0.0477755	0.194779	NS
let-49	-0.256838	17.1919	-2.11452	0.0480909	0.195945	NS
R06C1.4	0.740847	18.2551	2.11414	0.0482356	0.196413	NS
Y53F4B.14	-0.29236	17.5908	-2.11194	0.0483373	0.196707	NS
efl-2	-0.221221	16.0246	-2.10911	0.0486085	0.197689	NS
Y11D7A.10	0.527602	16.7016	2.10923	0.0487058	0.19772	NS
akt-1.1	0.170394	19.6178	2.10823	0.0486933	0.19772	NS
snrp-200	-0.166599	20.9195	-2.10815	0.048701	0.19772	NS
gpb-1	-0.283169	21.1442	-2.10744	0.0487699	0.197838	NS
cdc-14.1	0.16456	17.7419	2.10718	0.0487947	0.197838	NS
bckd-1a	0.132974	20.2353	2.10682	0.0488297	0.197859	NS
C16C10.1	0.264753	16.9041	2.10639	0.0488712	0.197906	NS
cbp-1.1	-0.187533	19.0301	-2.10489	0.0490167	0.198303	NS
ulp-1	0.18704	18.0101	2.10455	0.0490497	0.198303	NS
let-19	-0.150235	17.2869	-2.10445	0.0490591	0.198303	NS
suca-1	0.15745	22.4374	2.10381	0.049121	0.198432	NS
smn-1	1.11473	16.9453	2.10048	0.0495549	0.200063	NS
vps-50	0.550572	15.8218	2.09974	0.0496269	0.200124	NS
R148.3	-0.103933	19.297	-2.09843	0.0496462	0.200124	NS
T24G10.2	-0.256522	17.7862	-2.09828	0.0496608	0.200124	NS
vem-1	0.332685	17.967	2.09792	0.0497121	0.200209	NS
row-1	0.177789	18.0694	2.09669	0.0498166	0.200508	NS
trap-3	-0.285881	20.8585	-2.09557	0.0499272	0.200831	NS
mig-15	-0.222232	17.558	-2.09523	0.0499605	0.200843	NS
C07A12.7	-0.426629	22.5956	-2.09538	0.0500552	0.201067	NS
fis-2	0.339536	18.0657	2.09432	0.0500768	0.201067	NS
rtfo-1	-0.152188	18.7985	-2.09286	0.0501952	0.20142	NS
fem-1	-0.131527	16.1055	-2.09152	0.0503274	0.201826	NS
crh-1	0.228431	18.2612	2.09122	0.0503575	0.201826	NS
F44G4.2	-0.349797	17.5527	-2.0905	0.0504555	0.201963	NS
rbc-1	-0.329683	15.9886	-2.09031	0.0504585	0.201963	NS
skr-12	-0.318817	18.3997	-2.08998	0.0504906	0.201963	NS
sig-7	-0.165811	17.5132	-2.08965	0.0505136	0.201963	NS
mbk-2	0.32122	17.8356	2.08893	0.0505855	0.202128	NS
scd-1	-0.25056	17.3982	-2.08802	0.0506761	0.202368	NS
Y37A1B.7	-0.652961	17.4924	-2.0881	0.0507788	0.202656	NS
C05C8.7	-0.414897	17.6063	-2.08727	0.0508436	0.202675	NS
csn-5	-0.221554	19.8349	-2.08634	0.0508446	0.202675	NS
K01A2.5	0.337452	16.6099	2.08531	0.0509473	0.202953	NS
grdn-1	-0.229568	16.8045	-2.08503	0.0509759	0.202953	NS
mek-2	0.336043	19.5968	2.08447	0.0510883	0.203279	NS
R12C12.9	0.658384	16.1685	2.08217	0.0513741	0.204293	NS
Y45G12B.2	-0.132343	18.1696	-2.0765	0.0518393	0.206019	NS
hil-3	0.306992	21.3216	2.07591	0.0519252	0.206237	NS
sod-4	0.784074	17.0521	2.07555	0.0520466	0.206471	NS
ZK154.5	-0.215028	16.7893	-2.07467	0.0520255	0.206471	NS
F13H8.5	-0.763423	16.6379	-2.07416	0.0521894	0.20679	NS
uaf-1	-0.133163	20.8291	-2.07352	0.0521432	0.206731	NS
rbg-2	0.143877	18.4061	2.072	0.0522998	0.207104	NS
sip-1	0.298164	23.8553	2.07197	0.0523483	0.207142	NS
aco-1	-0.232125	21.8677	-2.07105	0.0523977	0.207142	NS
K08E4.3	0.342186	16.2623	2.07083	0.0524218	0.207142	NS
gbf-1	-0.114146	18.9599	-2.07069	0.0524347	0.207142	NS
cth-1	0.401079	18.2111	2.06957	0.0526464	0.207731	NS
F45H10.2	0.203643	21.7069	2.06909	0.052599	0.207667	NS
exc-15	1.01571	17.3736	2.06897	0.0527232	0.20791	NS
acl-12	0.205213	15.8684	2.06704	0.0528113	0.208133	NS
hum-6	-0.338253	16.8734	-2.0636	0.0531691	0.209418	NS
ntl-2	-0.283147	17.5455	-2.06289	0.0532441	0.209589	NS
wrt-2	-0.547335	17.5108	-2.06324	0.0533185	0.209725	NS
mrps-18a	-0.183798	17.6843	-2.06195	0.053342	0.209725	NS
tag-343	-0.426176	16.3793	-2.06015	0.0536242	0.21071	NS
nduf-9	-0.483772	20.8412	-2.05886	0.053778	0.211063	NS
tag-342	0.327827	16.0592	2.05831	0.0537256	0.210983	NS
C10F3.7	-0.788661	17.4084	-2.05761	0.0539097	0.211216	NS
H20J04.9	0.201315	17.5708	2.05658	0.053906	0.211216	NS
C08F8.2	0.187401	16.6954	2.05652	0.0539125	0.211216	NS
unc-75	-0.410509	16.2883	-2.05564	0.0540993	0.211681	NS
sup-12	-0.3156	17.0674	-2.05466	0.0541091	0.211681	NS
drsh-1	0.218414	17.0909	2.05449	0.0541279	0.211681	NS
tba-4	0.897248	16.7872	2.05465	0.0542227	0.211681	NS
cas-1	-0.342409	19.6196	-2.05444	0.0542226	0.211681	NS
mans-1	-0.630173	18.417	-2.05412	0.0542795	0.211681	NS
cox-6c	0.491635	19.3306	2.05404	0.0542871	0.211681	NS
W04C9.4	-0.210276	18.0858	-2.05317	0.0542676	0.211681	NS
rps-8	-0.205139	23.6242	-2.05242	0.0543473	0.211753	NS
F25H8.1	-0.24841	16.5322	-2.05221	0.0543695	0.211753	NS
T05A12.3	-0.249465	16.7514	-2.05137	0.0544589	0.211977	NS
rde-2	0.185477	15.726	2.04853	0.0547628	0.213034	NS
T06E6.1	-0.186525	16.7074	-2.04706	0.0549209	0.213364	NS
spl-1	0.208546	18.3291	2.04704	0.0549226	0.213364	NS
cdd-2	0.214887	20.0432	2.04683	0.0549453	0.213364	NS
uba-5	-0.198171	18.5638	-2.04654	0.0549764	0.213364	NS
K12H4.5	-0.705509	19.5132	-2.04689	0.0550514	0.21353	NS
cutl-16	0.301508	16.5961	2.04422	0.0552261	0.214082	NS
ccm-3	0.154019	18.7232	2.04313	0.0553436	0.214412	NS
ogt-1	0.18676	18.4222	2.04214	0.0554515	0.214704	NS
vrk-1	0.155029	19.446	2.04183	0.0554848	0.214708	NS
tftc-3	-0.152127	17.4123	-2.03879	0.0558155	0.215804	NS
efl-1	-0.205517	19.9766	-2.03862	0.0558333	0.215804	NS
skr-14	-0.45286	18.9946	-2.03823	0.0559896	0.216185	NS
ntl-3	-0.202499	18.7933	-2.03712	0.0559972	0.216185	NS
Y53F4B.21	-0.11021	16.7814	-2.03601	0.056119	0.216529	NS
cyk-3	0.169189	19.6546	2.0357	0.0561529	0.216534	NS
rpl-7	-0.201667	23.8917	-2.03123	0.0566445	0.218302	NS
piga-1	1.32572	16.2057	2.03134	0.0567465	0.218314	NS
eif-3.j	-0.18502	21.6454	-2.0306	0.0567148	0.218314	NS
sna-3	-0.165771	18.5649	-2.03033	0.056744	0.218314	NS
rsp-5	0.321744	16.7621	2.02859	0.0569368	0.218807	NS
ent-2	0.357344	18.3895	2.02875	0.0570123	0.218828	NS
rps-19	-0.251719	23.4481	-2.02836	0.0569621	0.218807	NS
vab-19	-0.142433	15.7584	-2.02826	0.0569736	0.218807	NS
wdr-62	-0.218601	16.0435	-2.02731	0.0570798	0.21896	NS
ZK637.14	-0.139248	15.7893	-2.027	0.0571137	0.218963	NS
Y39A1A.14	-0.280565	18.1537	-2.02582	0.0572456	0.219161	NS
tmem-24	-0.179361	15.4979	-2.02543	0.0572887	0.219161	NS
metl-1	-0.242106	18.3662	-2.02531	0.0573017	0.219161	NS
crn-3	-0.16273	17.4611	-2.02511	0.0573248	0.219161	NS
nono-1	-0.255652	20.7518	-2.02488	0.0573503	0.219161	NS
pph-4.1	-0.297231	17.5482	-2.02476	0.0573638	0.219161	NS
F23F1.5	0.219148	17.6906	2.02305	0.0575549	0.219764	NS
tomm-40	0.24365	21.5316	2.02195	0.0576785	0.219897	NS
algn-9	-0.207495	17.7573	-2.02159	0.0577185	0.219897	NS
C06G1.1	-0.573959	16.9362	-2.02195	0.0577924	0.219897	NS
dsbn-1	0.21357	17.2992	2.02155	0.0577226	0.219897	NS
tbc-14	0.163236	19.1265	2.02115	0.0577684	0.219897	NS
hgap-1	0.20422	17.4766	2.0209	0.0577957	0.219897	NS
gakh-1	-0.254689	16.6265	-2.02056	0.0578345	0.219897	NS
C26B9.3	-0.608241	18.9253	-2.0209	0.0579109	0.219982	NS
nsun-5	-0.169244	16.5133	-2.02037	0.0578554	0.219897	NS
F01G4.6	0.173835	24.2895	2.01934	0.057972	0.220087	NS
Y45G5AL.1	-0.267578	18.267	-2.01824	0.0580961	0.220432	NS
K02G10.5	-0.184058	15.7031	-2.01762	0.0581659	0.220571	NS
unc-115	-0.454618	17.9137	-2.01765	0.0582768	0.220826	NS
F10A3.17	0.459318	22.7252	2.01722	0.0583255	0.220826	NS
gly-10	-0.178227	17.9525	-2.01606	0.0583433	0.220826	NS
sqv-3	0.234996	17.2261	2.01574	0.0583789	0.220826	NS
ZK1058.3	0.343251	16.0727	2.01579	0.0584	0.220826	NS
rab-30	-0.187976	17.583	-2.01487	0.0584779	0.220895	NS
ercc-1	0.164613	16.5629	2.01481	0.0584848	0.220895	NS
myrf-2	0.308219	18.9456	2.01379	0.0586275	0.221263	NS
K12C11.1	0.233862	19.5124	2.01337	0.0586491	0.221263	NS
nucb-1	-0.233301	19.8082	-2.01244	0.058755	0.221326	NS
C50B8.6	-0.226551	15.7193	-2.01231	0.0587691	0.221326	NS
bath-42	-0.254942	16.4638	-2.0121	0.0587934	0.221326	NS
T07A9.15	-0.356764	16.1738	-2.01209	0.0588373	0.221326	NS
ethe-1	0.326179	17.9551	2.01198	0.0588343	0.221326	NS
Y105E8B.9	-0.357568	16.3934	-2.0117	0.0588666	0.221326	NS
K02B7.3	0.331644	16.8553	2.01079	0.0589437	0.22149	NS
sucl-1	0.394006	18.3963	2.01094	0.0590264	0.221676	NS
clh-6	0.197765	17.1663	2.00883	0.059168	0.222081	NS
R05H5.3	-0.260001	21.2198	-2.00834	0.0592239	0.222165	NS
uso-1	-0.126065	18.2089	-2.00663	0.0594215	0.22278	NS
F34H10.3	0.161074	15.8495	2.00579	0.0595181	0.223016	NS
dpy-7	-0.287379	16.4295	-2.00485	0.0596264	0.223295	NS
T28B11.1	0.216021	15.8402	2.00339	0.0597961	0.223805	NS
nuo-4	-0.257818	20.4068	-2.0024	0.059911	0.224108	NS
ubl-1	-0.247142	21.5938	-2.00196	0.0599619	0.224171	NS
nprl-3	0.269241	15.9879	2.00159	0.0600051	0.224206	NS
gspd-1	0.167734	20.0508	2.00106	0.0600662	0.224308	NS
Y75B8A.13	-0.18205	15.6659	-2.00047	0.0601356	0.224441	NS
eif-3.C	-0.139493	21.8104	-1.99996	0.0601945	0.224503	NS
mua-3	-0.311858	16.7043	-1.99974	0.0602201	0.224503	NS
dnj-19	-0.255556	20.042	-1.99909	0.0602967	0.224662	NS
fask-1	0.180002	18.074	1.99826	0.0603928	0.224867	NS
trm-2a	-0.121445	19.068	-1.99803	0.0604197	0.224867	NS
fat-1	-0.405829	18.428	-1.99819	0.0605171	0.224977	NS
cdkr-3	-0.139052	19.1141	-1.9974	0.0604945	0.224977	NS
pvf-1	0.217661	16.1378	1.99562	0.0607025	0.225437	NS
snr-6	-0.197372	22.4362	-1.99557	0.0607089	0.225437	NS
tut-2	0.332322	16.0349	1.9949	0.0608144	0.225575	NS
rpc-1	-0.15681	18.1578	-1.99476	0.0608045	0.225575	NS
sinh-1	0.19092	17.2854	1.99412	0.0608796	0.225691	NS
ulp-3	0.530143	20.6749	1.99431	0.0609723	0.225782	NS
cacn-1	-0.153046	18.6608	-1.99358	0.0609426	0.225782	NS
lea-1	0.568817	21.9112	1.99356	0.0610608	0.225942	NS
F43D9.1	-0.503531	18.8991	-1.99337	0.0610838	0.225942	NS
C26B2.7	-0.150482	16.8912	-1.99192	0.0611392	0.226021	NS
F20G2.2	0.329286	18.7162	1.99152	0.0612446	0.226284	NS
pinn-4	0.390223	18.6107	1.99058	0.0614032	0.22646	NS
R144.10	0.41454	15.7674	1.99035	0.0614414	0.22646	NS
mrps-25	-0.186287	18.9932	-1.98957	0.0614178	0.22646	NS
T05A12.4	-0.266496	15.7158	-1.98951	0.0614243	0.22646	NS
ZK355.2	0.272406	15.8506	1.98919	0.0614633	0.22646	NS
ndx-7	0.202847	17.4139	1.98866	0.0615258	0.226564	NS
unc-51	-0.146106	17.4305	-1.98691	0.0617346	0.227207	NS
F10E9.4	-0.111752	16.1779	-1.98575	0.0618729	0.22752	NS
H40L08.1	0.169604	17.5325	1.98562	0.0618884	0.22752	NS
lips-3	-0.410404	16.2118	-1.98549	0.0620045	0.227734	NS
acs-17	0.600382	17.5227	1.98524	0.0620498	0.227734	NS
E02H4.6	0.240082	18.1728	1.98433	0.0620428	0.227734	NS
mam-1	-0.371621	16.4091	-1.98388	0.062144	0.227855	NS
C03D6.9	-0.356017	16.1471	-1.98354	0.062186	0.227855	NS
T09B4.8	-0.190042	19.8638	-1.98333	0.0621626	0.227855	NS
cct-5	-0.158497	22.9155	-1.98176	0.0623511	0.228333	NS
2024-01-01	-0.161607	18.8081	-1.98105	0.0624373	0.228523	NS
pha-1	-0.174302	16.56	-1.98037	0.0625184	0.228693	NS
cpn-1	0.449111	20.4156	1.97912	0.0627864	0.22942	NS
K07F5.14	-0.166674	16.9179	-1.97829	0.0627702	0.22942	NS
F10E9.3	-0.202801	16.515	-1.97779	0.0628315	0.229458	NS
lin-11	-0.139944	15.4969	-1.97699	0.062928	0.229684	NS
let-4	-0.271132	17.2799	-1.97667	0.0629674	0.229701	NS
pes-4	-0.345237	17.7232	-1.97625	0.0630657	0.229806	NS
mrpl-24	-0.159809	18.5517	-1.9759	0.0630601	0.229806	NS
T09F3.4	0.573715	16.7682	1.97614	0.0631483	0.229981	NS
daf-15	-0.18956	17.8002	-1.97389	0.0633051	0.230425	NS
adbp-1	-0.208838	17.8807	-1.97258	0.0634648	0.230844	NS
ZC84.1	-0.229179	15.5987	-1.97238	0.0634901	0.230844	NS
C54G4.9	0.205427	16.341	1.97135	0.0636161	0.231059	NS
T24B1.1	-0.20667	16.6926	-1.97132	0.063619	0.231059	NS
lsm-6	0.171347	20.7871	1.97046	0.0637254	0.231319	NS
set-18	-0.446302	17.0933	-1.96985	0.0639075	0.231726	NS
Y71H2AM.20	0.14247	18.3099	1.96947	0.0638463	0.231631	NS
tmem-189	-0.21737	15.663	-1.96822	0.0640009	0.231938	NS
samt-1	-0.445727	16.3069	-1.96836	0.0641009	0.232046	NS
rnp-5	-0.272554	19.6631	-1.96755	0.0640833	0.232046	NS
pcyt-1	-0.154747	18.7804	-1.96565	0.0643177	0.232703	NS
ddp-1	0.301056	18.7038	1.96462	0.0644727	0.233137	NS
Y55B1AR.2	-0.173869	16.4562	-1.96311	0.0646333	0.23359	NS
dhs-3	0.735473	17.3893	1.96271	0.0647998	0.233623	NS
unc-60.1	0.211005	21.1868	1.96212	0.0647567	0.233623	NS
T12G3.4	0.227792	19.9327	1.96188	0.0647857	0.233623	NS
F54F2.9	-0.166724	17.0675	-1.96187	0.0647873	0.233623	NS
nkat-3	0.211093	19.4071	1.96162	0.0648187	0.233623	NS
hrpl-1	-0.169032	17.9791	-1.96133	0.0648547	0.233625	NS
nsy-4	-0.441251	19.5604	-1.96106	0.0650061	0.234024	NS
F53B1.2	-0.279197	16.5324	-1.95988	0.0650361	0.234024	NS
COX2-ctc.2	0.457391	21.0107	1.95981	0.065162	0.234128	NS
T14B4.19	-0.415222	17.454	-1.95911	0.0652348	0.234128	NS
clr-1	-0.142346	17.4733	-1.95865	0.0651892	0.234128	NS
rab-5	0.242372	19.2149	1.95845	0.0652146	0.234128	NS
C35D10.6	0.276668	18.022	1.95823	0.0652419	0.234128	NS
xrn-1	0.122858	18.5002	1.9575	0.0653333	0.234329	NS
ttc-17	-0.149981	17.5897	-1.95628	0.0654864	0.234738	NS
ubc-19	-0.129705	16.1647	-1.9559	0.065535	0.234738	NS
vms-1	0.147565	18.0417	1.95553	0.0655811	0.234738	NS
pgk-1	0.158514	21.6845	1.95547	0.065589	0.234738	NS
tag-241	-0.393672	18.4898	-1.95542	0.0657064	0.234989	NS
ugt-33	1.12928	18.4256	1.95528	0.0657302	0.234989	NS
mask-1	0.189285	18.8087	1.95295	0.0659075	0.235496	NS
ubxn-6	0.213224	20.0287	1.95201	0.0660253	0.235789	NS
C17E4.10	-0.197436	15.8865	-1.95046	0.0662228	0.236367	NS
atf-7	-0.239542	16.8313	-1.95011	0.0662667	0.236397	NS
lec-8	0.874659	16.4248	1.94832	0.0666134	0.237122	NS
pqn-20	-0.186118	17.9284	-1.9476	0.0665869	0.237122	NS
plag-15	-0.232337	18.2787	-1.94749	0.0666008	0.237122	NS
phm-2	-0.153257	17.6961	-1.94748	0.0666018	0.237122	NS
clp-1	0.364328	19.436	1.94762	0.0666868	0.237129	NS
kmo-1	0.274346	16.4394	1.94695	0.0666703	0.237129	NS
nepr-1	0.317426	22.917	1.94712	0.0667477	0.237218	NS
B0041.8	0.170416	19.3521	1.94572	0.0668275	0.237374	NS
C05D11.1	0.17599	20.5389	1.94324	0.0671456	0.238333	NS
eral-1	0.261693	16.8682	1.94299	0.0671774	0.238333	NS
lron-11	-0.15855	16.664	-1.94277	0.0672054	0.238333	NS
F31D4.5	-0.412879	17.4783	-1.94207	0.0674016	0.238773	NS
cutl-9	-0.269503	18.0151	-1.94133	0.0673912	0.238773	NS
elo-4	-0.535998	16.6575	-1.94096	0.0675573	0.239196	NS
glrx-10	0.303936	21.4326	1.93966	0.0676711	0.239343	NS
par-5	0.135072	24.5133	1.93929	0.0676554	0.239343	NS
lad-2	-0.157748	15.698	-1.93859	0.0677458	0.23948	NS
C30H6.9	0.381475	15.7775	1.93869	0.0678403	0.239591	NS
F20D6.11	0.442214	17.683	1.93819	0.0679166	0.239591	NS
Y65B4A.8	0.364899	18.2261	1.938	0.0679222	0.239591	NS
erv-46	-0.203858	16.8652	-1.93739	0.0679011	0.239591	NS
C34E10.12	0.465168	16.6046	1.93712	0.0680552	0.239933	NS
suox-1	0.160622	16.9628	1.93581	0.0681067	0.239986	NS
F01F1.2	0.187667	17.7555	1.93354	0.0684027	0.240901	NS
F44E2.8	-0.218085	19.3932	-1.93287	0.0684905	0.241028	NS
act-3	1.12796	21.3659	1.93309	0.068581	0.241145	NS
ZK813.6	-0.175111	15.292	-1.93271	0.0685116	0.241028	NS
sgo-1	0.266561	17.0561	1.93167	0.0686481	0.241146	NS
aly-3	-0.203272	20.4229	-1.93162	0.0686543	0.241146	NS
patr-1	-0.164829	18.8798	-1.93122	0.0687074	0.241204	NS
F39H11.1	0.298133	16.7846	1.93066	0.0687812	0.241204	NS
pqn-70	-0.240457	17.8104	-1.9305	0.0688015	0.241204	NS
cir-1	-0.149191	16.7542	-1.93039	0.0688166	0.241204	NS
cux-7	-0.198972	17.1885	-1.93002	0.0688648	0.241245	NS
C07D8.6	-0.253865	23.4293	-1.92958	0.0689229	0.241321	NS
M70.5	-0.204912	15.7501	-1.92918	0.0689755	0.241378	NS
Y82E9BR.17	-0.282484	16.3373	-1.92792	0.069142	0.241833	NS
hmg-1.1	0.339433	22.7365	1.92784	0.0692597	0.241989	NS
F41C3.8	0.229465	15.3601	1.92734	0.0692178	0.24197	NS
sfa-1	-0.12643	19.5765	-1.92646	0.0693345	0.242122	NS
T27F6.6	0.160103	16.9375	1.92583	0.0694177	0.24224	NS
gpx-5	0.779088	16.8934	1.92604	0.0695088	0.24224	NS
ubc-15	-0.238519	18.5191	-1.92519	0.0695019	0.24224	NS
Y71H10B.1	-0.178212	19.3397	-1.9251	0.0695146	0.24224	NS
ZK1127.4	-0.216436	18.1797	-1.92436	0.069613	0.24244	NS
apb-3	-0.17143	15.9998	-1.92411	0.0696453	0.24244	NS
dhs-25	0.372293	17.6386	1.92402	0.069757	0.242702	NS
Y56A3A.28	-0.319025	18.068	-1.92142	0.0700378	0.243441	NS
wht-1	-0.168006	15.6578	-1.92113	0.0700431	0.243441	NS
pdi-1	-0.145769	24.2255	-1.92008	0.0701826	0.243798	NS
C50F4.16	0.207196	17.9584	1.91902	0.0703249	0.244164	NS
cpr-9	-0.58528	16.3524	-1.91884	0.070469	0.244536	NS
png-1	0.124872	18.0966	1.91618	0.0707066	0.245232	NS
top-3	0.147291	17.499	1.91556	0.0707893	0.245391	NS
Y71F9AR.4	0.152755	16.7502	1.91422	0.0709706	0.24589	NS
C09G9.1	-0.357811	17.6632	-1.91354	0.0711605	0.246162	NS
hrpf-2	-0.129749	18.6748	-1.91327	0.0710988	0.24614	NS
sir-2.4	0.211636	16.4254	1.91314	0.0711171	0.24614	NS
lbp-4	0.275522	20.2492	1.91143	0.0713593	0.246592	NS
set-2	-0.16874	16.8538	-1.91135	0.0713595	0.246592	NS
inx-14	0.286317	18.7918	1.91077	0.0714554	0.246795	NS
ZC449.1	1.03643	16.2761	1.90968	0.0717062	0.247532	NS
Y48C3A.3	0.673041	17.8481	1.90822	0.0719057	0.247963	NS
F40G9.17	0.166318	18.3987	1.90734	0.0719059	0.247963	NS
lem-2	-0.113012	21.4308	-1.90543	0.0721665	0.248732	NS
cts-1	0.192164	23.229	1.90514	0.0722064	0.24874	NS
fkb-5	-0.420937	20.7628	-1.90461	0.0724	0.249277	NS
M18.3	0.201386	17.5641	1.90263	0.0725517	0.24967	NS
sym-4	0.330031	15.6197	1.90273	0.0726384	0.249838	NS
F53E10.6	-0.352165	17.6308	-1.90241	0.0726779	0.249845	NS
vit-2	0.274834	27.1975	1.90185	0.072758	0.249894	NS
NA	-0.344819	16.3325	-1.90131	0.0727679	0.249894	NS
wdr-48	0.149148	19.055	1.90055	0.0728393	0.25001	NS
ugt-57	-0.305473	16.7167	-1.89952	0.0729813	0.250368	NS
crn-5	-0.177875	17.3203	-1.89863	0.0731045	0.25066	NS
syx-4	-0.340573	18.0907	-1.89761	0.0733441	0.251221	NS
oac-51	-0.302906	17.2742	-1.89694	0.0733399	0.251221	NS
arx-1	-0.20353	19.0296	-1.89593	0.0734796	0.251555	NS
hpk-1.1	-0.130263	16.7308	-1.89466	0.0736572	0.252033	NS
bre-4	0.16629	16.2444	1.89413	0.0737311	0.252096	NS
F57A8.1	-0.130487	15.3366	-1.89398	0.0737517	0.252096	NS
attf-3	-0.152236	18.278	-1.89316	0.0738661	0.252357	NS
Y39A1A.21	-0.180363	17.7609	-1.8926	0.0739446	0.252495	NS
eif-3.K	-0.151905	21.667	-1.89174	0.0740658	0.25274	NS
idh-2	0.239105	18.6564	1.89155	0.0740928	0.25274	NS
B0495.7	0.171772	20.8896	1.89113	0.0741514	0.25281	NS
hhat-1	-0.512437	16.7602	-1.89024	0.0743977	0.253388	NS
daf-31	-0.13257	19.794	-1.88953	0.0743765	0.253388	NS
M04B2.4	0.138185	17.5193	1.8882	0.0745635	0.253822	NS
rbm-42	-0.130957	17.7577	-1.88721	0.0747037	0.254119	NS
mom-5	-0.316227	16.5289	-1.88704	0.0747274	0.254119	NS
ubc-1	-0.24174	18.9027	-1.88551	0.0749441	0.254725	NS
cwn-2	-0.204007	16.1146	-1.88406	0.07515	0.255138	NS
C25H3.17	0.202002	15.7771	1.8839	0.0751731	0.255138	NS
npp-18	-0.227863	20.2409	-1.8837	0.0752016	0.255138	NS
hsf-1	-0.187432	17.6039	-1.88347	0.075234	0.255138	NS
Y17G7B.3	0.220396	17.8447	1.88325	0.0752657	0.255138	NS
pmt-2	-0.251801	18.4439	-1.88303	0.0752967	0.255138	NS
F49C12.12	-0.357676	20.2262	-1.88318	0.0753855	0.25518	NS
C14H10.2	-0.236197	17.7526	-1.8824	0.0753861	0.25518	NS
nhr-48	0.207433	15.8366	1.88183	0.0754667	0.255322	NS
ced-9	-0.287502	17.2049	-1.88156	0.0755064	0.255326	NS
nurf-1	0.116594	18.2404	1.88047	0.0756617	0.255624	NS
tam-1	-0.239632	17.6094	-1.8804	0.0756717	0.255624	NS
mrps-35	-0.124531	19.226	-1.87988	0.0757464	0.255745	NS
Y65B4BM.3	-0.68762	19.078	-1.87771	0.0761786	0.256681	NS
ceh-20	-0.20603	17.2944	-1.87737	0.0761059	0.256681	NS
atp-1.1	-0.241914	15.4976	-1.87715	0.076137	0.256681	NS
C32D5.8	0.275229	20.8908	1.87717	0.0761631	0.256681	NS
ttr-53	0.332135	17.0987	1.87508	0.0764649	0.257515	NS
arx-7	-0.207986	19.771	-1.8738	0.0766202	0.257876	NS
Y41C4A.8	-0.273456	16.5558	-1.8736	0.0766499	0.257876	NS
Y73B3A.4	-0.215453	15.544	-1.8732	0.076707	0.257936	NS
cnt-1	-0.151224	17.8959	-1.87217	0.0768559	0.258306	NS
dnj-1	-0.141438	18.5441	-1.87186	0.0769017	0.258329	NS
cerk-1	0.342018	16.9229	1.87144	0.076991	0.258385	NS
eng-1	0.140032	16.6865	1.8712	0.0769965	0.258385	NS
trx-4	0.221481	18.6079	1.86985	0.0771935	0.258915	NS
M01H9.3	0.444401	16.9354	1.8694	0.0773806	0.25904	NS
sbds-1	0.239873	19.098	1.86869	0.0773624	0.25904	NS
bath-1	-0.170811	16.1605	-1.86847	0.077394	0.25904	NS
F33H2.2	-0.110394	18.1252	-1.86842	0.0774018	0.25904	NS
T04C9.1	-0.123152	17.8637	-1.86807	0.0774532	0.25904	NS
lin-61	0.194161	19.6922	1.86798	0.0774656	0.25904	NS
H43I07.1	0.28958	17.9201	1.86673	0.077649	0.259521	NS
daf-1	-0.140062	16.4447	-1.86646	0.0776878	0.259521	NS
his-74	0.164382	16.7346	1.86593	0.077765	0.259648	NS
R05D11.9	-0.136251	18.5028	-1.86455	0.077968	0.260074	NS
M79.2	-0.138918	15.3802	-1.86453	0.0779711	0.260074	NS
chat-1	0.189078	17.6541	1.86354	0.0781168	0.260324	NS
cdh-8	-0.286059	16.2168	-1.86348	0.0781249	0.260324	NS
gnrr-4	0.953466	17.9001	1.86207	0.0784548	0.260899	NS
T25D3.4	-0.239514	17.3134	-1.86167	0.0783908	0.260899	NS
polh-1	0.280706	15.7513	1.86168	0.0784081	0.260899	NS
exos-7	-0.193672	18.1821	-1.86139	0.0784335	0.260899	NS
rbr-2	-0.129636	17.3743	-1.86047	0.0785681	0.261144	NS
C17E4.20	-0.189763	16.3354	-1.86009	0.078625	0.261202	NS
rpl-25.1	-0.539353	20.5446	-1.85908	0.0788962	0.261578	NS
ppm-2	0.195125	18.9218	1.85879	0.0788167	0.261575	NS
ego-2	0.157413	19.2388	1.85876	0.078822	0.261575	NS
F53F8.5	0.177642	18.7638	1.85853	0.0788557	0.261575	NS
F36A2.2	-0.174531	16.4391	-1.85762	0.0789904	0.261702	NS
nemp-1	0.153195	19.1127	1.85747	0.0790125	0.261702	NS
[truncated: 4,622 more rows]
