# Supplementary material for: Oocyte mitochondria link maternal environment to offspring phenotype
Source: Research Square preprint supplement (doi:10.21203/rs.3.rs-4087193/v1), 2024-03-29
Supplement: Supplementary file 2 [file 5ab8881252c9f12f24e62798.xlsx]

## Sheet: Figure 1
	Fig 1c	Genetic background and parental [NaCl]	N2 (WT) - 50 mM	N2 (WT) - 300mM	nuo-6 50 mM	nuo-6 300 mM	nduf-7 50 mM	nduf-7 300 mM	gas-1 50 mM	gas-1 300 mM	mev-1 50 mM	mev-1 300 mM	sdha-2 50 mM	sdha-2 300 mM	isp-1 50 mM	isp-1 300 mM	asg-2 50 mM	asg-2 300 mM	clk-1 50 mM	clk-1 300 mM	fzo-1 50 mM	fzo-1 300 mM	eat-3 50 mM	eat-3 300 mM	drp-1 50 mM	drp-1 300 mM
			0	39	0	0	0	0	0	0	0	0	0	6	0	0	0	5	0	33	0	53	0	40	0	34
			0	50	0	0	0	0	0	0	0	0	0	3	0	0	0	9	0	26	0	71	0	32	0	46
			0	54	0	0	0	0	0	0	0	0	0	6	0	0	0	12	0	30	0	60	0	43	0	31
			0	27
			0	19
			0	29
			0	17
			0	15
			0	13
			0	26
			0	26
			0	24
	Fig 1d		Wild-type	gas-1	nduf-7	nuo-6	mev-1	isp-1
			100	100	100	100	100	31
			100	100	100	100	100	28
			100	100	100	100	100	27
	Fig 1e		Wild-type	gas-1	nduf-7	nuo-6	mev-1	isp-1
			100	93	94	98	73	1
			100	89	92	98	74	1
			100	89	91	98	76	1
	Fig 1f		Wild-type	gas-1	nduf-7	nuo-6	mev-1	isp-1	isp-1(CRISPR - P225S)	isp-1; pGermline::isp-1
			45	9	31	12	12	0	0	27
			42	6	33	18	8	0	0	33
			43	6	29	31	9	0	0	27

## Sheet: Figure 2
		Column 1	Column 2	Column 3	Column 4	Column 5	Column 6	Column 7
Fig. 2a	Total number of offspring hatched, mobile and developing	0	0	0	50	6	17	0
	Total number of offspring that are in a near suspended animation state	622	515	161	78	35	18	117
		Column 1	Column 2	Column 3	Column 4	Column 5	Column 6
Fig. 2b	Total number of offspring hatched, mobile and developing	0	0	0	161	0	28
	Total number of offspring that are in a near suspended animation state	264	395	224	232	165	35
Fig. 2d	WT	nduf-7	nuo-6	isp-1
	1	0.181478	0.449426	0.974292
	1.13988	0.183029	0.391599	1.10454
	1.11018	0.220277	0.326585	0.187803
Fig 2e	WT	nduf-7	nuo-6	isp-1
	1	0.557752	0.0468198	0.991041
	1.08744	0.592876	0.0855804	0.972335
	1.16887	0.550466	0.0404001	0.50973
Fig 2f	WT	nduf-7	nuo-6	isp-1
	1.16387	1.34285	1.32212	1.10849
	1.30348	1.28056	1.13172	1.13515
	1	1.23332	1.17365	1.05299

## Sheet: Figure 3
Fig. 3c	WT	aak-2(n6218)	aak-2(n6237)	aak-2(n6251)	aak-2(n6252)	aak-2(bur1)	aak-2(ok524)	aak-2(T243A)	aak-2(C201S)
	0	60	66	71	65	56	84	63	11
	0	47	49	58	73	26	77	55	9
	0	57	49	68	75	25	92	56	3
Fig. 3d	wild-type	isp-1	aak-2	aak-2; isp-1
	100	0	100	63
	100	0	100	44
	100	0	100	66
		Column 1	Column 2	Column 3
Fig. 3e	Total number of offspring hatched, mobile and developing	0	156	0
	Total number of offspring that are in a near suspended animation state	290	122	102

## Sheet: Figure 4
Fig 4a	WT	aak-2
	1	0.411097
	0.564558	0.905147
	0.571836	1.85252
	2.48028
Fig 4b	WT 500 mM NaCl	WT starvation	aak-2 500 mM NaCl	aak-2 starvation
	0.994969	0.541062	0.545577	0.186804
	1.09057	0.483667	0.800977	0.197795
	0.989155	0.32397	0.478912	0.0683029
	0.615912	0.477855
Fig 4c	WT 500 mM NaCl	WT starvation	aak-2 500 mM NaCl	aak-2 starvation
	1.3031	0.303345	0.478878	0.0157043
	0.790738	0.248246	0.291992	0.044028
	0.764455	0.206093	0.394352	0.0350628
	0.996033	0.264062
Fig 4d	WT	aak-2
	1	5.11979
	0.707961	6.86519
	2.45132	2.94282
	2.63606
Fig 4e	WT	aak-2
	3.22284	4.98952
	0.592187	5.78047
	1.57404	3.35877
	2.5737
Fig. 4f	WT	aak-2
	0.227936	5.4843
	0.288988	14.1037
	0.125094	4.45287
	0.188019
Fig. 4g	WT	aak-2	gpdh-2	aak-2; gpdh-2
	0	20	0	0
	0	9	0	0
	0	28	0	0

## Sheet: Figure S2
Fig. S2a	WT	isp-1
	1	2.37782
	0.729982	1.52175
	0.851966	2.06014
Fig. S2b	Wild-type	Wild-type	isp-1	isp-1
	1	17	2.11	50
	0.54	37	0.92	95
	2.52	72	1.67	161
