# Supplementary material for: Oocyte mitochondria link maternal environment to offspring phenotype
Source: Research Square preprint supplement (doi:10.21203/rs.3.rs-4087193/v1), 2024-03-29
Supplement: Supplementary file 3 [file 9f0fbb24014d2cc4ba255f3a.xlsx]

## Sheet: WT from 50 mM vs 300 mM parents
Corrected Gene-ID	logFC	adj.P.Val
Y47G6A.22	0.91514	4.75381e-08
ctl-1	0.789892	4.75381e-08
fkb-2	0.700028	4.75381e-08
aagr-2	0.603924	4.75381e-08
ins-34	-3.23526	4.75381e-08
T21H3.1	1.00248	5.56079e-08
aass-1	0.676651	6.68024e-07
ZK1010.2	0.6932	7.99366e-07
R151.8A	0.48778	1.1014e-06
ttx-7	0.473382	1.1014e-06
fmo-5	0.667266	1.12037e-06
lys-4	11.2671	1.29394e-06
Y39G8B.1	0.781571	3.16676e-06
Y39A1A.22	0.487168	4.1914e-06
ZC155.4	1.80298	4.36194e-06
ltah-1.1	0.450536	4.36194e-06
vps-45	0.354287	4.36194e-06
lbp-6	1.27563	7.89213e-06
enol-1	0.403179	7.94028e-06
M18.6	0.737905	1.48741e-05
ctl-3	2.1746	1.62238e-05
ZK353.9	0.548615	1.6739e-05
Y39A3CL.4	0.600268	1.99313e-05
men-1	0.352439	1.99313e-05
rle-1	1.15329	2.16277e-05
ogt-1	0.493161	2.16277e-05
C53H9.2	-0.307336	2.16277e-05
clp-1	0.305322	2.42244e-05
msra-1	1.06073	2.55349e-05
lys-8	1.37553	2.63099e-05
ZK550.6	0.914803	2.63099e-05
F35C11.5	0.827698	2.63099e-05
asns-2	3.75743	2.91499e-05
top-2	-0.259018	2.91499e-05
acox-3	0.717101	2.93173e-05
icl-1	0.792328	2.97765e-05
gln-3	0.811627	4.26661e-05
Y42A5A.5	0.43345	5.28057e-05
algn-11	0.647066	5.48346e-05
gtf-2A2	0.680884	5.78059e-05
alh-8	0.417497	6.06787e-05
alh-5	0.599094	6.25674e-05
C44B7.7	1.94997	6.40948e-05
Y71H2AM.20	0.421895	6.40948e-05
wago-4	0.730805	6.60372e-05
tag-96	-0.663596	6.60372e-05
alh-6	0.520554	6.73075e-05
sams-1	0.699452	6.80576e-05
F32D8.12	1.18853	7.12436e-05
F25B5.6	0.756065	8.26026e-05
Y37E11AL.3	-0.358583	8.57342e-05
vit-3	-0.306374	0.00010246
rad-8	0.338281	0.000105033
maoc-1	0.578064	0.000129567
ubxn-4	0.348151	0.000129567
lap-2	0.192837	0.000177484
mthf-1	0.744899	0.000202612
npa-1	0.435347	0.000202612
hil-4	-0.358212	0.000202612
F53F1.2	0.357071	0.000217564
Y53F4B-39.1	0.324314	0.000217564
sdz-30	-0.625004	0.000217564
sto-3	1.43401	0.000225743
C01G10.7	0.357062	0.000227912
patr-1	-0.227789	0.000227912
mtrr-1	0.445495	0.000238322
pyk-1	0.273616	0.000239723
gpdh-2	0.57043	0.000249458
kdin-1	0.768033	0.000276689
T25E12.6	-0.404929	0.000276689
ttr-15	1.17714	0.000299485
acs-19	0.575295	0.000301186
aldo-2	0.276799	0.000306919
EEED8.15	-0.603434	0.000306919
oatr-1	0.68739	0.000320602
slc-36.1	0.596978	0.000320602
chil-10	0.295961	0.000323381
pad-2	0.366201	0.000325135
dbn-1	0.194468	0.000346492
cht-1	1.43946	0.000349162
tra-3	0.639314	0.000349162
T25B9.9	0.417419	0.000349162
C35D10.17	1.18561	0.00035722
ttx-7.1	0.360876	0.00035722
C36A4.4	0.356145	0.00035722
C04F12.1	0.260091	0.00035722
lem-2	-0.189756	0.00035722
acdh-11	0.285222	0.000377205
psd-1	0.366644	0.000388082
F22B8.7	0.337358	0.000388082
adpr-1	0.2388	0.00049858
stdh-1	0.286192	0.000547959
ZK1307.9	0.884444	0.0005526
mmcm-1	0.207504	0.000581682
ptc-1	0.368372	0.000609759
toca-2	0.641149	0.000621529
cbn-1	0.718623	0.000638151
hphd-1	0.992192	0.000650711
daf-22	0.498996	0.000688609
far-3	1.57546	0.000741093
fmo-2	2.43291	0.000776509
Y54G11A.7	1.0185	0.000776509
gst-39	0.973053	0.000776509
pdpr-1	0.418993	0.000776509
ZK1098.11	0.278561	0.000776509
C42C1.13	0.565011	0.000790067
alh-7	0.666452	0.000808263
inx-14	0.633493	0.000808263
tasp-1	0.334069	0.000809417
clec-266	0.960482	0.000882287
ckb-4	0.365872	0.000926566
tpi-1	0.461941	0.000970224
lmd-3	0.438702	0.000995417
appg-1	1.21064	0.000998259
imp-3	0.420485	0.00101511
nprt-1	0.325255	0.00101511
inx-3	-0.19519	0.00106399
smn-1	0.389263	0.00109826
haf-3	0.346386	0.00109826
C01G5.5	0.293904	0.00109826
W10C8.5	1.3508	0.00115134
F58H1.2	1.48558	0.00117074
mig-22	0.238292	0.00120344
ipgm-1	0.339672	0.001237
peli-1	-0.713133	0.001237
alh-10	0.500831	0.00127554
cox-17	0.569402	0.00130856
F17C8.9	0.978215	0.00134982
SRP-2	0.455616	0.00141478
Y34B4A.2	1.14417	0.00146806
hch-1	0.722081	0.00146806
T07C4.3	-0.307645	0.00148365
hpd-1	0.830042	0.00148936
toca-1	0.374128	0.00148936
zig-11	1.01979	0.00148983
C37H5.13	0.402651	0.00150928
ZK856.16	0.578622	0.00161416
cth-1	0.527108	0.00161416
sod-2	0.378937	0.00163593
agl-1	0.2022	0.00166757
ent-1	-0.24118	0.00166757
asg-2	0.431518	0.00170387
ugt-4	0.555939	0.0017484
T14F9.2	0.325957	0.0017484
Y54G11A.11	-0.313541	0.0017484
W02H5.8	0.414756	0.00188079
F46B6.12	0.349215	0.00193294
T13F2.2	-0.202059	0.00193542
exc-15	1.44102	0.00194376
qdpr-1	0.558214	0.00194376
C07D10.5	-0.383313	0.00196841
dld-1	0.27202	0.00199092
epg-2	-0.541012	0.00199571
lpd-8	0.292801	0.00206982
C30H6.8	0.483454	0.00211791
glrx-10	0.307935	0.00211791
sco-1	-0.171174	0.00213497
noa-1	-0.198651	0.0021549
pfkb-1.1	-0.220709	0.0021697
gyg-2	0.428436	0.00222733
ogdh-2	0.226075	0.00222733
Y110A7A.7	1.71348	0.00223759
Y54G11A.3	0.835191	0.00223892
cyp-29a2	0.595193	0.00226747
acdh-1	0.931509	0.00231749
mif-1	0.400395	0.00231749
hex-3	0.297479	0.00231749
hars-1	-0.182626	0.00231749
F54F7.6	1.10211	0.00233047
R04D3.3	0.654039	0.00233047
pdcd-2	-0.297091	0.00235246
ckb-2	-0.600021	0.00236097
M01H9.3	0.463339	0.0024133
ZK632.12	-0.24168	0.00243148
F20D6.11	0.592387	0.00244089
D1086.11	2.47503	0.00246582
C13F10.5	-0.633363	0.00256506
idhg-1	0.157166	0.00267448
vit-4	-0.257796	0.00267448
F53E10.1	0.418671	0.0026855
vps-4	0.214826	0.00271503
Y65B4BL.4	0.68892	0.00272452
atg-2	-0.242017	0.00272452
C52B9.4	-0.311763	0.00272452
immp-2	0.301718	0.00275822
hrpu-1	-0.17484	0.00283875
cgh-1	0.380538	0.00285228
sdha-2	0.269671	0.00285228
ZK1307.8	0.245707	0.00285228
mms-19	0.255911	0.00301396
vha-15	0.225248	0.00301396
hach-1	0.45636	0.00303333
ttr-45	0.976327	0.00308683
gpdh-3	0.191858	0.00312153
pck-1	1.2163	0.00318205
ula-1	0.193442	0.00318205
F17A9.2	0.232683	0.0032032
sec-31	0.236296	0.00330385
mboa-3	0.594242	0.00335499
Y47G6A.21	0.263553	0.00335499
hcp-4	-0.370489	0.00335499
ttr-51	0.585182	0.00336715
H34C03.2	0.634982	0.00339324
unc-78	0.309053	0.00342804
pah-1	0.782534	0.00351187
tspo-1	0.235417	0.00351187
ZK154.1	0.777943	0.00354941
F30A10.2	0.557097	0.00362898
K11H12.1	-0.381389	0.00365505
T25B9.12	-1.43233	0.00365505
rad-54.b	0.282803	0.00369279
prp-4	0.15459	0.00369279
met-2	-0.19008	0.00371124
ufl-1	0.143175	0.00375767
lea-1	0.482498	0.00377809
Y38E10A.24	0.524288	0.00383168
spe-15	0.52169	0.0038634
ret-1	0.978883	0.0039168
C31C9.2	-0.235585	0.0039168
cyp-13B1	0.94866	0.00393078
simr-1	0.290309	0.00393724
C17C3.1	0.650014	0.00425327
Y54H5A.2	-0.238659	0.00428466
cka-1	0.554971	0.00436853
akt-1	0.261894	0.00436853
qua-1	0.717672	0.00466126
hpl-2.1	0.432847	0.00466126
far-5	1.01505	0.00478639
clec-91	0.646322	0.00478639
C06E7.88	0.501522	0.00478639
hpo-12	0.384039	0.00478639
acl-5	0.232673	0.00478639
Y37E3.1	-0.439169	0.00479704
pmt-1	-0.576168	0.00479704
K07C11-7	0.807364	0.00485755
T23B5.4	0.567058	0.00485755
acs-11	0.432526	0.00485755
F02H6.2	0.221627	0.00488109
F32A5.4	0.676116	0.00501087
F20G2.3	0.602801	0.00502624
ZK858.6	-0.166738	0.00518635
oga-1	0.36666	0.00519562
cyn-7	0.248214	0.00520933
letm-1	0.172077	0.00525354
sacy-1	-0.189874	0.0053445
rpl-25.1	-0.449856	0.00534696
henn-1	0.204731	0.00540323
ugt-52	0.378426	0.00541454
gad-3	0.357182	0.00546048
W05H12.1	0.861891	0.00546694
gakh-1	0.292504	0.00546694
mboa-6	0.238561	0.00547359
sto-1	0.561174	0.00562592
R09F10.8	0.266573	0.00564627
fkh-7	0.341781	0.0057175
vha-13	0.15358	0.0057175
nsun-2	-0.200977	0.00572039
F29B9.11	-0.33375	0.00572039
C06H2.2	0.547412	0.0057643
vhp-1	0.493162	0.0057643
irs-2	0.136581	0.0057643
rpap-3	-0.178573	0.0057643
tmed-10	-0.198376	0.0057643
cpr-9	1.06717	0.00590991
trxr-2	0.731702	0.00610155
coa-6	1.07473	0.00616783
F52E1.14	1.22578	0.00625975
F33H2.6	0.275466	0.00625975
DC2.5	0.852015	0.00630763
ubc-25	0.332879	0.00630763
mogs-1	0.222599	0.00647811
C50F4.16	0.312047	0.00649764
Y71G12B.10	0.247482	0.00649764
acsd-1	0.890539	0.00652909
dpff-1.1	1.02692	0.00658123
Y69A2AR.1	0.69521	0.00662498
mnat-1	0.253624	0.00665088
cdl-1	-0.253051	0.00665859
nsun-4	0.194676	0.00680787
F08F1.4	0.930824	0.0068549
coa-5	0.239317	0.0068549
R06B9.5	0.385169	0.00692025
ipla-6	0.288521	0.00695815
knl-2	-0.208842	0.00695815
ZC247.1	0.546397	0.00701476
kbp-5	-0.277052	0.00702192
cas-1	0.288606	0.00715591
csc-1	-0.341386	0.00715591
H40L08.1	0.232309	0.00716056
rif-1.1	-0.400833	0.00716056
M03D4.4	-0.415312	0.00716056
ZC373.5	1.04557	0.00724838
C15C6.1	1.12117	0.00728276
ttr-48	0.443446	0.00728276
pfd-5	-0.223147	0.00728276
tbh-1	-0.353799	0.00728276
F52C6.2	0.699987	0.00728671
fahd-1	0.635275	0.00728671
cpn-1	0.499953	0.00728671
lpr-6	0.48739	0.00728671
Y62E10A.6	0.19506	0.00728671
F22G12.4	0.181032	0.00728671
T05H10.3	0.996742	0.00736376
alh-3	0.333239	0.00736376
C02F5.3	-0.141952	0.00736376
E02C12.19	0.197967	0.00738194
psr-1	0.852095	0.00751722
mrpl-48	-0.213554	0.00751722
gln-1	0.339115	0.00756806
D2045.7	0.457947	0.00763901
C37C3.2	0.219083	0.00764583
lbp-9	0.49271	0.00766722
sdha-1	0.22307	0.00766722
ebp-2	0.219227	0.00766722
cth-2	0.88798	0.00769174
cdd-2	0.207314	0.00769417
R12C12.5	0.245672	0.00772992
har-1	0.506363	0.00782383
cpr-6	-0.337845	0.00782383
Y57A10A.31	0.46849	0.00793162
T10B11.6	0.346264	0.00797604
B0024.13	0.337036	0.00797604
ugt-61	0.767086	0.0080432
C04G6.4	0.318327	0.0080432
K08F4.3	0.252826	0.0080432
nmat-2	0.809424	0.00807996
F25F8.1	0.504794	0.00807996
pod-1	0.264325	0.00807996
ZK154.4	0.706428	0.00818741
mrps-22	-0.161621	0.00818741
ung-1	-0.258361	0.00818741
grd-14	1.90637	0.00819407
F32B5.1	0.895594	0.00821133
semo-1	0.601138	0.00821133
Y105E8B.9	-0.577079	0.00821133
dhp-1	-1.159	0.00821133
snx-14	-0.411415	0.00834663
orc-1	-0.266818	0.00845118
cest-25	0.437871	0.00856231
T19B4.3	0.333126	0.00863437
Y39G10AR.11	-0.341287	0.00881662
mai-2	0.218813	0.00883563
lin-65	-0.330955	0.00885644
aldo-1	0.588396	0.00888884
casy-1	0.390303	0.00896062
ttr-47	0.870494	0.00907685
tre-2	0.687098	0.00907685
cdc-14	-0.273999	0.00907685
nstp-10	0.33093	0.00935301
D2030.2	0.147968	0.00935301
ttr-3	1.07313	0.00944712
acox-1.1	0.414274	0.00944712
sem-5	0.282146	0.00944712
C32D5.8	0.215503	0.00946349
ZK856.7	0.40335	0.00949421
Y45G12B.3	0.235832	0.00956326
T04A8.7	0.184311	0.0096134
F29A7.6	-0.311002	0.00968252
mca-3	0.262677	0.00981072
panl-3	0.150368	0.00981072
F10G8.9	0.32871	0.00987606
pqe-1	-0.290198	0.00987606
rib-1	-0.746739	0.00988293
knl-3	-0.328915	0.00991255
Y94H6A.7	0.970347	0.00991736
hex-2	0.744092	0.00991736
spe-5	0.438839	0.00993771
soap-1	-0.160985	0.00993818
copz-1	0.441304	0.00996011
abcf-2	0.201054	0.00996069
col-104	1.1767	0.0099984
pck-2	0.269218	0.0100672
T23G11.11	0.61128	0.0102229
K01A2.5	0.563803	0.0102229
amdh-1	0.527724	0.0102229
mtcu-1	0.356349	0.0102229
F26H9.5	-0.315123	0.0102229
F46H5.3	0.295031	0.010299
tdo-2	0.432438	0.0105475
pcmd-1	-0.270392	0.0108815
alp-1	0.797146	0.0109297
pqn-68	0.592691	0.01097
C05C10.3	0.362172	0.01097
sqv-6	0.192687	0.01097
W09G3.8	-0.374923	0.01097
Y71A12B.11	-1.08387	0.01097
T28F4.5	1.28941	0.010983
Y49F6C.8	-0.596212	0.0110355
emc-5	0.616337	0.0110846
rsks-1	0.117666	0.0110846
ahsa-1	-0.237508	0.0112795
C42D4.3	1.80448	0.0113282
R119.2	0.303366	0.0114427
phm-2	-0.172823	0.011478
daf-4	0.247928	0.0115348
haly-1	0.577968	0.0116689
tppp-1	0.37097	0.0117802
K07E3.1	0.407167	0.0118417
cpt-6	0.223301	0.0118961
ZK973.1	0.323698	0.0119064
Y82E9BR.18	-0.159183	0.0119162
coq-3	0.183181	0.0119219
gcn-2	0.287055	0.0119402
acs-4	0.235912	0.0119597
trip-4	0.180038	0.0120118
F36G3.1	0.776236	0.0120589
C29E4.12	-0.168479	0.0120589
moa-2	5.56697	0.0120695
wdr-23	0.732409	0.0120695
Y56A3A.22	0.708641	0.0120695
Y47D3A.20	0.390699	0.0120695
cec-3	-0.175631	0.0120695
atz-1	-0.382689	0.0120695
unc-52.1	0.906966	0.0120783
cdh-4	-0.250263	0.0121118
nlp-28	1.44179	0.0121655
tat-5	0.16687	0.0121655
prg-1	0.606361	0.0122972
vab-10	0.93677	0.0123649
Y38H8A.1	0.748491	0.0124319
Y24F12A.1	0.45671	0.012629
C24A3.4	0.898083	0.0126787
F15B9.10	0.552278	0.0126787
wago-1	0.341677	0.0126787
scpl-4	-0.155377	0.0127678
fars-2	0.278017	0.0129551
R03H10.11	-0.398775	0.0130747
ttr-37	0.54783	0.0130784
F40A3-3	0.240577	0.0130784
dpf-5	0.192804	0.0130784
C06G3.6	-0.170838	0.0130784
oma-2	0.542374	0.0130995
ebp-1	0.225429	0.0130995
mca-1	-0.41085	0.0131997
Y11D7A.5	0.730905	0.0133173
R144.13	0.442444	0.0133243
C32E8.9	0.366003	0.0134013
C33F10.4	0.710879	0.0139259
Y59A8B.12	0.266251	0.014007
rme-2	0.35347	0.0140234
met-1	-0.166572	0.014095
kars-1	-0.277485	0.014095
unc-23	0.548366	0.0141567
his-39	-0.62642	0.0143008
tre-1	0.379512	0.014415
K08E4.2	0.433324	0.0145565
dsl-3	0.247979	0.0145601
mrps-2	-0.236301	0.0146057
erfa-1	0.132383	0.014731
R04D3.2	0.268198	0.0148887
C34C12.6	0.449028	0.0150367
ucr-2.2	0.226993	0.015125
ZK177.8	0.472675	0.01513
Y43F8B.3	0.522039	0.0151417
daf-25	-0.175792	0.0154069
T28B8.1	1.10358	0.0154396
chs-1	0.637705	0.0154843
M01E5.2	0.44088	0.0155073
R08F11.1	0.776241	0.0155375
dpf-3	0.181587	0.0156995
rsbp-1	0.537711	0.0158707
vha-8	0.19556	0.0158707
let-418	-0.103758	0.0158707
rars-1	-0.207748	0.0158707
nmrk-1	0.833523	0.0159971
hip-1	0.186087	0.0159971
F14D7.2	-0.168562	0.0159971
fln-1	0.506844	0.016043
ech-8	0.613761	0.016127
spdl-1	-0.224414	0.0161536
rps-26	0.263488	0.0161828
T21B6.3	1.3831	0.0162084
ears-1	-0.179972	0.0162084
gsk-3	0.153359	0.0162148
B0310.2	-1.10858	0.0162148
ruvb-1	-0.169528	0.0163027
cyc-2.1	-0.141392	0.0163049
K04G2.9	1.58257	0.0163618
best-19	0.650324	0.0166813
mcp-1	0.523221	0.0166813
aagr-3	0.295661	0.0166813
R05D11.9	-0.176455	0.0166813
C45B2.2	2.28199	0.0167416
cest-35.1	0.570234	0.0167856
dhs-28	0.497686	0.0167856
Y51H7C.41	-0.395277	0.0167856
Y62E10A.13	0.258108	0.0168081
F21C10.10	-0.382272	0.0169184
pcs-1	0.47362	0.0170315
ecps-1	-0.205015	0.0170315
npp-20	0.17682	0.0170932
tag-225	0.490092	0.0172081
aco-2	0.35403	0.0176237
F37B12.3	0.373347	0.017758
mesp-1	0.318579	0.0178916
W05F2.6	0.220536	0.0178916
mrpl-42	0.893179	0.0179704
F32H2.10	0.197301	0.0180853
egl-26	0.474288	0.0181805
Y54G2A.76	0.649084	0.0184149
Y39G8B.2	0.40857	0.0184333
pgk-1	0.201037	0.0184435
Y60A3A.21	0.528419	0.0186971
ttr-8	0.605785	0.0191206
ttc-1	0.271099	0.0191206
mep-1	-0.168885	0.0191206
F54D11.4	-0.17332	0.0191206
eif-2Bgamma	0.15318	0.0191251
pcp-5	0.226026	0.0191427
syx-16	0.394433	0.0196077
acox-1.6	0.59709	0.0198438
dhrs-4	0.563284	0.0198884
D2007.1	0.544375	0.0200906
egg-2	0.427687	0.0203496
ugt-45	-0.253808	0.020739
inos-1	-0.217236	0.0207809
44991	0.174066	0.0208032
cogc-2	0.193093	0.0208508
C18A3.3	-0.236925	0.0208508
C08B11.9	-0.325177	0.0208508
selt-1.1	0.221396	0.0210338
arx-6	-0.105259	0.0210552
nex-1	0.258244	0.0212167
gars-1	-0.175906	0.0212167
thoc-5	-0.134069	0.0212768
Y45F3A.9	0.271677	0.0213028
ifc-2	0.379561	0.0213222
far-1	0.430699	0.0213319
cbs-1	-0.216271	0.0213319
F32D8.4	-0.191842	0.021398
H23N18.5	1.90161	0.02147
C14B9.10	0.41347	0.0215722
gob-1	0.664878	0.0216951
lin-24	0.393743	0.0216951
Y47D3A.1	0.308681	0.0216951
F09E5.7	0.300618	0.0216951
mlc-5	0.205992	0.0216951
erfa-3	0.251259	0.0219428
pam-1.1	0.154718	0.0219799
hat-1	-0.316346	0.0219799
W05H9.1	0.268828	0.0220176
sre-56	0.346294	0.0220267
hacl-1	0.333026	0.0220267
C27D8.4	0.22181	0.0220502
zfp-1	-0.174062	0.0220502
ife-3	0.25978	0.0221032
moc-3	0.458997	0.0221136
vars-1	0.334575	0.0221136
mys-1	0.18203	0.0221136
fubl-2	-0.12166	0.0221136
Y48G1A.1	0.479273	0.0222187
mrpl-14	0.449429	0.0222187
btbd-10	0.287616	0.0222187
F39H12.3	0.269492	0.0222187
pbrm-1	-0.104018	0.0222187
sna-2	-0.24518	0.0222187
Y11D7A.10	-0.308022	0.0222187
F10D11.6	0.678723	0.0222511
sucl-2	0.119669	0.0222808
C01G6.9	0.572064	0.0225826
nyn-1	0.63394	0.0229562
col-76	0.373909	0.0231001
Y48E1C.4	0.227488	0.0231046
algn-14	0.516456	0.0231333
K11H3.3	0.218247	0.0233706
T22B7.3	-1.10887	0.0233706
enri-1	0.217724	0.023374
cisd-1	0.180189	0.0235374
eva-1	0.556602	0.0235883
nhx-2	0.481995	0.0236161
M05D6.5	0.372809	0.0238456
cdc-37	-0.0992134	0.0239276
tomm-70	-0.210401	0.0239276
nhr-41	0.602669	0.0241986
sqv-3	0.265738	0.0242595
Y92H12BR.3	-0.13495	0.0242595
T24H7.9	-0.160316	0.0243881
F21D5.3	1.06665	0.0245722
R11D1.1	0.348352	0.024636
hxk-3	0.222469	0.0247209
D1022.4	0.200818	0.0247209
C39D10.8	0.498925	0.0247354
B0511.6	-0.202083	0.0247803
F29C6.1	0.806423	0.024994
dpy-26	-0.109146	0.024994
idh-2	0.242696	0.0250046
hif-1	0.30755	0.0251246
tomm-40	-0.169662	0.0251309
Y51H4A.15	0.372152	0.0252372
mrps-24	0.488071	0.0252801
H04M03.3	0.214948	0.0257928
T27A10.6	0.39869	0.0259345
ccg-1	0.291977	0.0259379
ajm-1	1.34551	0.0261843
prx-5	0.402827	0.0261843
Y39G10AR.9	0.255623	0.0261843
F34H10.3	0.617984	0.0263429
polg-1	0.334534	0.0263429
kle-2	-0.272291	0.0263429
zyg-9	-0.136297	0.0263512
cash-1	-0.163695	0.0263557
unc-52	0.41532	0.0264654
ndx-9	0.47079	0.02657
K12C11.1	0.188844	0.02657
mdt-29	-0.166242	0.0266951
ppm-1.d	-0.245867	0.0267157
anat-1	0.373582	0.0267494
mpc-2	0.372875	0.02675
Y48B6A.13	0.586018	0.0268564
dgat-2	0.44633	0.0269515
F59A3.12	0.361448	0.0269515
grl-7	0.575863	0.026986
sos-1	0.298336	0.0272301
idh-1	0.324649	0.0275433
trpa-1	0.495399	0.0275889
ubh-1	0.347758	0.0275889
sod-3	0.563257	0.0279347
eppl-1	0.458998	0.0279577
map-1	0.213838	0.0281667
Y71H2AM.20	0.389683	0.0281842
Y41D4B.6	0.308944	0.0281998
far-2	0.230481	0.0281998
hgo-1	0.42462	0.0282201
gpx-2	0.216594	0.0282201
Y54G9A.5	1.05301	0.0282756
epg-5	0.236173	0.0282756
pat-3	-0.133083	0.0282756
Y87G2A.2	0.894872	0.0283027
T28C6.3	-0.492587	0.0283027
Y39E4B.6	0.495831	0.0283439
mog-3	-0.263112	0.0284456
T03D8.6	0.504532	0.0285281
lmn-1	-0.146052	0.0285281
lbp-3	0.317756	0.0286871
tba-1	-0.0991705	0.0290176
ndx-6	0.412808	0.0290313
pnk-1	0.297709	0.0293014
gcst-1	0.215077	0.0293115
cnt-1	0.144953	0.0294975
Y76A2B.5	2.55983	0.0296266
C04F12.5	1.25164	0.0296768
cah-5	0.691688	0.029882
obr-1	0.403652	0.0299794
Y50D4A.4	0.208806	0.0299794
R02D5.3	-0.22148	0.0299794
pgp-6	0.460997	0.0302932
iglr-2	0.193385	0.0302932
cpf-1	0.157896	0.0302932
dylt-1	-0.216974	0.0302932
dcap-1	-0.266872	0.0302932
NA	0.171463	0.0303027
Y55F3BR.6	0.909065	0.0304622
mmaa-1	0.332299	0.0304622
arch-1	-0.396807	0.0304622
pdr-1	0.215551	0.0306798
eri-9	0.751847	0.0307113
ppw-2	0.495593	0.0307396
C49A9.9	0.954366	0.0308769
Y48A6B.9	0.441502	0.0308769
dpy-31	0.387141	0.0308769
nhr-10	-0.24633	0.0308769
ras-1	1.0873	0.0310383
T19C3.2	0.528726	0.0310383
pmp-2	0.34741	0.0310383
Y50D4B.4	-0.615204	0.0310383
C35B1.5	0.477708	0.0310763
F37C4.6	-0.247104	0.031121
ppw-1	0.274055	0.0312516
natc-2	0.140621	0.0314021
C26E6.12	0.294695	0.0315641
stip-1	-0.150936	0.0315641
dhhc-6	0.53375	0.0315827
ZK1320.3	1.47093	0.0315866
tmem-120	0.163051	0.0315866
ZK742.4	0.496101	0.0317611
lid-1	0.277047	0.0318259
mdh-1	0.283133	0.0318355
car-1	0.242005	0.0318355
W03A5.6	-0.242267	0.0318355
tep-1	0.388803	0.0320239
T25B9.8	0.917112	0.0320389
F41E6.12	0.785239	0.0321777
C35D10.7	0.311858	0.0323069
copa-1	0.122998	0.0324949
rpn-11	-0.157924	0.0326505
dhs-19	0.514255	0.0327004
gsp-4	2.38815	0.0327912
C50F4.1	0.856638	0.0327912
B0272.3	0.21334	0.0327912
pro-3	-0.266557	0.0327912
Y47G6A.9	-0.658356	0.0327912
unc-26	0.157674	0.032856
pes-9	0.150115	0.0332921
rom-5	-0.233018	0.0334855
cpi-1	1.22066	0.0335094
dhs-24	-0.170396	0.0335094
snap-1	0.136016	0.0336321
C23H4.6	2.71801	0.0336972
gna-1	0.976066	0.0338717
spat-2	0.540079	0.0340038
T06D8.10	0.780931	0.0340485
zfp-3	-0.212028	0.0342233
frm-4	0.157227	0.0344015
R53.5	0.432881	0.0345821
Y105C5A.1	1.02944	0.034666
ZK185.3	1.01146	0.0347857
sec-20	-0.192275	0.0351749
C08F8.9	0.890266	0.0351944
unc-34	0.245783	0.0351944
F11A10.5	0.36549	0.0353718
baz-2	-0.201708	0.0353718
dpl-1	-0.11797	0.035453
sta-1	0.746266	0.0354828
F26E4.3	0.454208	0.035608
moag-4	-0.295234	0.035608
C38C10.2	-0.32717	0.0356863
idha-1	0.228107	0.0357141
vha-6	0.766586	0.03582
cec-5	-0.381116	0.0359868
lgc-34	0.687729	0.0360583
acs-17	0.381723	0.0361207
cct-3	-0.132045	0.036245
K08C7.4	0.788328	0.0363971
Y43F8B.1	0.51692	0.0368263
B0495.5	0.138908	0.0368263
sbds-1	-0.299516	0.0369373
rbm-39	0.0979242	0.0370138
dgk-1	0.6198	0.0370186
ttr-42	0.465911	0.0370186
nnt-1	0.515069	0.0372808
lir-1	0.53246	0.0373639
F12F6.1	-0.156163	0.0373639
F52D2.7	0.240072	0.0374387
Y55F3BR.1	0.219497	0.0375601
F38B2.4	0.529381	0.0375667
T06A4.3	0.756417	0.0375915
C46A5.4	0.7728	0.0377608
T20D3.14	0.512257	0.0377608
cln-3.2	0.393693	0.0377608
ect-2	-0.231629	0.0377608
knl-1	-0.350141	0.0377608
tbc-20	0.452707	0.0379009
ech-6	0.23203	0.0379009
F48D6.4	1.23026	0.0379496
F46C8.3	1.28872	0.0379528
cpr-5	1.19872	0.0379528
dus-2	0.60044	0.0379528
mec-7	0.363226	0.0379528
cyh-1	0.252589	0.0379528
eif-3.j	-0.182535	0.0379528
allo-1.1	-0.205515	0.0379528
gst-5	0.368589	0.0379541
bca-2	1.2507	0.0381336
hrpa-2	0.482157	0.0381336
upp-1	0.383847	0.0381336
rfl-1	0.21178	0.0381336
Y37H9A.3	0.162401	0.0381336
repo-1	-0.232968	0.0381336
gln-5	-0.40906	0.0381336
F13B12.4	2.39051	0.0382378
mif-2	0.307743	0.03837
ctsa-1.2	0.887029	0.0384155
duo-1	0.588066	0.0384735
F27D4.1	0.172091	0.0384735
F46B6.6	0.299795	0.038614
Y57A10A.8	0.438146	0.0387373
tin-9.1	-0.425168	0.0387373
pmp-5	1.26749	0.0388497
mua-6	0.445178	0.0388497
ubc-12	0.470913	0.0388754
lis-1	0.137519	0.0388754
K02F3.9	0.61806	0.03936
nhr-46	-0.125533	0.03936
uba-5	0.13816	0.0394226
M04C9.3	0.974051	0.0396148
npp-14	-0.158797	0.0396716
akt-2	0.914126	0.0396783
EEED8.2	-0.183037	0.039731
R144.6	0.643415	0.0397382
T19C3.5	0.178182	0.0397382
ragc-1	-0.264797	0.0398826
gly-20	0.460092	0.0399549
elc-1	0.159418	0.0399549
rab-7	-0.145795	0.0399549
set-27	0.233236	0.0400847
asp-4	-0.236125	0.0400847
D2045.9	0.258327	0.0401085
nlt-1	0.533006	0.0401616
C07E3.9	0.374362	0.0401826
sfa-1	-0.176714	0.0402209
abcf-1	-0.234452	0.0402558
asd-1	-0.445143	0.0403961
tth-1	0.169771	0.040989
acbp-1	0.320603	0.0410628
T14B4.3	-0.249002	0.0410628
mrp-8	0.341854	0.0411272
gcn-1	0.108654	0.0411272
F28C1-3	-0.397589	0.0411272
crn-6	0.401378	0.0411527
nra-1	-0.177968	0.0412931
Y94H6A.5	-0.34393	0.0412931
grd-1	1.10685	0.0413328
Y51F10.3	0.48814	0.0413564
rml-3	0.309817	0.0413564
nex-3	0.223844	0.0413564
C03D6.9	0.40634	0.0415941
ribo-1	-0.119694	0.0415941
EEED8.12	-0.443247	0.0415941
inft-2	-0.442885	0.041598
D2023.4	0.273129	0.0416037
F18A11.3	0.459106	0.041711
ZK856.11	0.396589	0.041711
hsf-1	0.150885	0.041711
npp-9	-0.153431	0.041711
ugt-49	-0.28614	0.041711
F13E9.13	0.491644	0.0420913
col-14	1.25425	0.0425042
F20G2.2	0.313118	0.0426214
istr-1	0.244483	0.0426214
ztf-4	0.155983	0.0426214
pph-5	-0.14354	0.0426214
F59B1.8	-0.419837	0.0426214
R11E3.19	0.37408	0.0427732
D1044.1	0.196609	0.0428284
nucl-1	-0.196362	0.0428616
serr-1	0.484088	0.0429896
F21G4.6	0.548323	0.0430666
Y39C12A.9	-0.267801	0.0431024
egl-27	-0.108004	0.04312
skr-3	0.920972	0.0431845
vha-12	0.25366	0.0435326
tag-281	0.912593	0.0435369
F10D2.10	0.507353	0.0435369
D1005.2	0.494871	0.0435369
Y73B6BL.27	0.432035	0.0435369
cup-14	0.249729	0.0435369
cdc-48.3	-0.131572	0.0435369
ldp-1	-0.144937	0.0435369
Y53C10A.6	-0.184195	0.0435369
tag-266	1.72933	0.0436574
K08E7.5	0.718545	0.0436574
bed-2	-0.194323	0.0437999
Y43B11AR.3	0.183194	0.0438026
cut-6	0.506465	0.0438429
lec-1	0.23156	0.0438429
Y47D9A.1	0.223173	0.0438429
F21D5.5	-0.112832	0.0438429
ola-1	-0.114753	0.0438429
EGAP2.1	0.831351	0.0439594
W06F12.2	0.621391	0.0439594
abts-1	0.215698	0.0439594
hsr-9	-0.137241	0.0439594
pars-2	-0.261527	0.0439594
Y52B11A.3	0.187419	0.0442024
nud-1	-0.214373	0.0442024
prp-6	0.170321	0.0442866
ctl-2	0.36907	0.0444067
T16G12.1	1.55921	0.0448112
par-3	0.480798	0.0448629
cysl-1	0.265238	0.0456664
R05D3-10	0.297856	0.0456774
aip-1	-0.191442	0.0456774
mop-25.3	0.28249	0.0456979
wht-2	0.200299	0.0456979
Y47G6A.7	-0.285826	0.0459689
rml-4	0.30493	0.0460675
vha-7	0.67484	0.0465308
wdr-5.2	0.608949	0.0465308
clk-1	0.429859	0.0465308
snx-27	0.17182	0.0466676
R102-4	0.746602	0.0466727
tebp-1	-0.211668	0.0466727
K05C4.7	-0.264452	0.0469695
F22G12.4	0.656351	0.0470557
sel-11	0.148629	0.0470557
C06A6.4	0.184886	0.0470757
act-4	0.365555	0.0475127
Y57E12AL.6	0.545599	0.0475613
Y17G7B.17	0.271285	0.0476454
moc-1	0.209876	0.0476454
F55A11.7	0.307644	0.0479533
pigm-1	0.442701	0.0479566
atf-7.1	-0.335477	0.0479566
pfd-1	-0.124706	0.0482471
cutl-9	0.757686	0.0482576
tsp-14	0.294579	0.0482576
K05C4.2	-0.11261	0.0482576
crn-3	-0.173578	0.0485376
rnh-2	-0.120066	0.048646
rfk-1	0.276296	0.0489832
fah-1	0.25626	0.0489832
clp-7	0.217637	0.0489832
pcca-1	0.145404	0.0489832
lit-1.1	-0.130989	0.0489832
T28D6.6	-0.187938	0.0489832
C35E7.4	1.3013	0.0495735
K11D2.1	0.452956	0.0495735
rde-8	0.384205	0.0495735
M142.5	0.282543	0.0495735
pph-4.2	0.250119	0.0495735
trx-4	0.209966	0.0495735
rpoa-49	-0.169817	0.0495735
cua-1	0.145434	0.0500109
acp-6	-0.382316	0.0501453
F31C3.3	-0.254142	0.0501453
K11H12.7	0.5115	0.0501453
T03G6.3	0.589679	0.0501453
pcbd-1	0.300942	0.0501453
Y62E10A.20	0.176987	0.0502481
abcf-3	0.124364	0.0503965
uda-1	0.215632	0.050664
ints-11	0.176238	0.0506687
B0395.3	0.213637	0.0508845
C36B1.11	0.154217	0.0508845
ZC328.3	0.55419	0.0508845
cdf-1	0.277572	0.0508949
ppm-1.A	-0.181543	0.0508949
rnp-7	0.11181	0.0508949
tipn-1	-0.362883	0.0508949
adah-1	0.291865	0.0511143
ceh-74	0.317888	0.0511143
lact-4	0.357637	0.0511143
mrps-17	-0.122892	0.0511143
dnc-5	0.695242	0.0516907
drp-1	-0.166468	0.051862
nhr-122	3.57151	0.0518917
K07E8-7	0.64864	0.0519522
tag-297	0.562056	0.0519522
rpl-13	-0.145246	0.0520418
rin-1	0.181773	0.0520463
Y39A1A.20	0.546223	0.052089
unc-52	0.467099	0.052089
vnut-1	0.241452	0.052089
C44E12.1	0.450685	0.0522003
pfd-6	-0.135589	0.0522003
Y18D10A.9	0.318099	0.0522003
C56E6.2	0.323798	0.0524774
ced-1	0.215888	0.0524774
emr-1	-0.185392	0.0528641
acl-4	0.323905	0.0532404
ldh-1	0.177398	0.0532404
sumv-2	-0.141787	0.053328
nhr-71	0.291983	0.0533534
pdhb-1	-0.202304	0.0533534
dhgd-1	0.343823	0.0537332
Y67A10A.7	0.732783	0.0540229
M60.4	0.675453	0.0547381
apc-1	-0.187781	0.05485
Y73F8A.5	4.23262	0.0549437
C27H6.9	0.165228	0.0550192
F46F11.7	0.47698	0.0550192
F45E1.1	0.586126	0.0552671
iscu-1	0.242819	0.0552671
snx-13	-0.303564	0.0552671
vab-10	0.371828	0.0552671
cah-4	1.76396	0.0554703
B0272.4	0.835755	0.0558011
sod-4	1.1114	0.0558011
VF13D12L.3	0.370998	0.0558348
Y69E1A.5	0.759828	0.0558348
ttr-59	3.23403	0.056264
Y49E10.4	0.144618	0.0564442
acox-1.5	1.2569	0.056607
chdh-1	0.313425	0.0567679
gly-8	0.673956	0.0568766
pfn-2	0.246003	0.0568766
vti-1	-0.170725	0.0568766
aps-2	0.826114	0.0570117
ZK370.4	0.243734	0.0570117
dxbp-1	-0.157512	0.0576332
K02D10.1	0.284751	0.0576332
kbp-2	-0.2237	0.0576348
icd-2	-0.146948	0.0581792
slc-25a10	0.289285	0.0582618
xpa-1	0.242232	0.0582618
dao-3	0.176162	0.0582677
dlat-2	0.187138	0.0582677
ntp-1	1.38712	0.0582677
F41B4.3	0.711984	0.0583683
C06G1.1	0.389787	0.0588546
acl-2	0.283915	0.0590559
C03C10.5	-0.23831	0.0592344
sym-3	0.728762	0.0592344
C39E9.8	1.4187	0.0592928
immt-1	0.0983784	0.0594947
marb-1	0.193212	0.0594947
C18B2.4	0.248103	0.0596079
dph-7	0.645006	0.0596079
wdr-46	-0.170166	0.0597495
C02B8.6	7.06164	0.059815
haf-6	0.239554	0.059815
mrpl-36	0.455828	0.059815
tin-13	-0.480095	0.059815
erd-2.2	0.950864	0.0602108
prmt-1	-0.299502	0.0602108
acl-9	0.262078	0.0603009
C35D10.6	0.274453	0.0603009
K02E10.4	0.459714	0.0603009
hpo-10	-0.128505	0.0603009
F35A5.8	0.766934	0.0603009
fbxc-50	-0.212163	0.0603009
mxl-1	0.411533	0.0603009
sax-3	0.103983	0.0603009
C25G4.2	-0.46981	0.0603555
mog-1	-0.120567	0.0603555
rga-4	-0.191188	0.0603555
usp-39	0.191949	0.0603555
cpt-2	0.157733	0.060415
Y82E9BR.14	0.16641	0.0605769
ZK1073.1	-0.22295	0.0605769
him-10	-0.233759	0.0606597
C10F3.7	0.815379	0.0608915
F36D3.1	0.167984	0.061039
C04H5.1	-0.314375	0.0610703
T24A6.20	0.331632	0.0610703
F13H6.3	0.495209	0.0610703
acds-10	0.229482	0.0613412
F44E5.1	0.325088	0.0613412
F37C12.3	0.209214	0.0613433
Y55F3C.17	0.947606	0.0613433
dhs-9	0.175786	0.0613433
gpd-2	0.383058	0.0613433
thoc-2	-0.0925112	0.0613433
herc-1	0.151149	0.0615178
nol-56	-0.175866	0.0619074
tpst-1	-0.139745	0.0620318
ZK662.2	3.21255	0.0622219
rack-1	0.106843	0.0622219
ttr-2	0.587421	0.0622219
ztf-27	0.489566	0.0622219
ZC449.2	0.515766	0.062608
tag-325	-0.154228	0.0627079
hpo-13	0.241675	0.0627887
acdh-13	0.0879008	0.0628741
M60.4	0.97545	0.0628741
swsn-4	-0.130887	0.0628741
alx-1	0.145387	0.0634448
misc-1	-0.125085	0.0634448
sumv-1	-0.103538	0.0634448
rpia-1	0.253676	0.0635064
Y47D3A.14	0.168514	0.0635332
algn-10	0.319174	0.0638325
C56C10.7	0.225708	0.0640052
cysl-4	-0.257209	0.0640052
mnk-1	0.725223	0.0640052
nuo-4	-0.141573	0.0640052
emb-30	-0.135752	0.064029
grk-2	0.403297	0.064029
F36A2.9	0.199138	0.0640968
sds-22	-0.15279	0.0640968
spd-5	-0.296131	0.0640968
gfi-2	0.199905	0.0643022
W02B12.11	-0.22185	0.064317
dpy-10	0.364241	0.064317
mrps-25	-0.230035	0.064317
ddb-1	0.193121	0.0644324
dnj-19	-0.192037	0.0644975
rpb-10	0.350802	0.0647449
C05C8.1	0.24247	0.0647942
amx-1	-0.138758	0.0648327
C07H6.2	0.295989	0.0648696
wdr-5.3	0.204859	0.0650211
sand-1	0.324114	0.0653181
Y46G5A.18	-0.469997	0.0654061
F13H8.5	0.946622	0.0654061
H29C22.1	1.19885	0.0654061
ints-9	0.164225	0.0654061
let-99	0.453591	0.0654061
prdx-3	0.190084	0.0654061
kat-1	0.201257	0.0654484
cec-10	-0.182739	0.0655318
C05D12.5	0.2393	0.065607
lin-13	-0.128416	0.065607
bcl-11	0.595058	0.0657608
Y41E3.7	0.148795	0.065807
brc-2	0.279678	0.0659876
F59C6.5	-0.0984943	0.0659876
cfap-36	0.578009	0.0659876
R05D3.12	0.173284	0.0659876
thoc-1	-0.123973	0.0659876
W09C3.4	-0.190796	0.0659876
Y47G6A.19	-0.213364	0.0660692
F14D12.1	0.513391	0.0664609
nck-1	0.113041	0.0664609
mrpl-49	0.255835	0.0665764
pab-2	-0.231937	0.0666286
slc-30a5	-0.153121	0.0666286
crn-2	0.243477	0.0669686
inx-13	0.293741	0.066974
bpnt-1	0.187831	0.0671031
spp-3	0.469746	0.0672603
rpc-2	0.117331	0.067727
F56D3.1	0.647869	0.0677289
nsun-5	-0.392544	0.0678479
cct-6	-0.108365	0.0679515
lars-2	0.224807	0.0679515
capg-1	-0.104407	0.0680223
C24B5.4	0.337486	0.068037
Y41D4A.4	0.199915	0.068037
dhs-4	0.221246	0.068037
F17E9.5	-0.325165	0.0683637
lap-1	0.121968	0.0683637
paqr-1	0.284255	0.0686335
sip-1	0.135426	0.0687191
npl-4.2	-0.252571	0.0688414
mdh-2	0.228629	0.0690349
sde-2	-0.185234	0.0690349
dhs-29	0.306987	0.069085
gpaa-1	0.19682	0.069352
fipr-21	1.0704	0.069352
lgl-1	0.205501	0.069352
C25H3.7	0.159288	0.0693874
ivph-3	0.134543	0.0693874
F19H6.4	0.446551	0.069412
hrpu-2	0.147031	0.0696081
lbp-1	0.266676	0.0696831
eef-1G	-0.123932	0.0698003
alkb-1	0.661947	0.0699674
dur-1	1.57898	0.0699674
C32D5.10	-0.125829	0.0701265
F53H1.4	-0.178542	0.0705336
swd-2.1	0.344142	0.0707271
T19H12.2	-0.288264	0.0707271
F54F7.2	1.30888	0.0708074
pef-1	0.723464	0.0708074
T19B10.2	0.366339	0.0709919
Y32H12A.8	-0.143492	0.0711154
tnt-3	-0.299488	0.0711154
hda-10	0.174294	0.0711154
pro-2	-0.209607	0.0711154
kel-3	0.278467	0.07112
catp-8	0.132762	0.07112
prx-6	0.377781	0.07112
aco-1	0.132892	0.0713477
best-14	0.6224	0.0713477
arl-5	0.263525	0.0713867
M01F1.8	0.298829	0.0713867
unc-33	-0.144237	0.0716284
metl-5	0.833151	0.0719892
mrrf-1	0.172199	0.0719892
ttll-5	-0.173711	0.0720882
afmd-2	0.449183	0.0721107
nkat-3	0.0930056	0.0721107
tsp-20	0.369152	0.0721107
lec-2	0.51638	0.0721187
rol-3	0.736962	0.0721822
C29F5.1	0.440551	0.0726072
F53B1.8	0.239596	0.0726072
K04G7.1	-0.199134	0.0728202
plc-4	0.196786	0.0728202
B0035.3	0.145372	0.072958
rtfo-1	-0.113739	0.072958
suro-1	0.816054	0.072958
egg-3	0.332768	0.0731313
R05H5.3	0.154955	0.0731607
sbp-1	0.403877	0.0733321
tnc-2	0.460982	0.0734934
rpa-1	-0.156055	0.0737828
shc-1	0.261519	0.0740829
aho-3	-0.161236	0.0744136
T09F3.4	0.418143	0.0744136
F32B5.7	2.03021	0.0746425
ucr-1	0.0989825	0.0749865
R07E5.4	0.83403	0.0750531
pccb-1	0.149641	0.0750639
pmt-2	0.243998	0.0753821
appg-2	0.697472	0.075467
VC5.2	1.20101	0.075467
hum-2	0.139938	0.075723
lec-3	0.529829	0.075723
Y37D8A.19	0.543397	0.075723
coa-1	-0.333537	0.075723
phip-1	0.216602	0.0757557
R148.3	-0.119024	0.0760683
popl-4	0.730718	0.0761121
rcan-1	0.672507	0.076154
alg-2	-0.152105	0.0762789
Y40C5A.4	0.45171	0.0763735
byn-1	-0.151561	0.0764975
nep-22	0.444099	0.0764975
snap-29	-0.172521	0.0764975
sma-1	0.151514	0.0765147
tbc-2	-0.214304	0.0765979
ubc-20	0.237932	0.0765979
F56B3.2	0.570117	0.0768845
F59F5.7	2.6518	0.0768845
Y45G5AM.7	-0.174692	0.0768845
C14B1.9	0.356806	0.0768874
Y56A3A.16	0.593266	0.0771185
mdt-27	-0.169337	0.0771185
mma-1	-0.0949648	0.0771185
mrpl-15	-0.138106	0.0771185
F37C4.4	0.500017	0.0771546
Y25C1A.13	0.293584	0.0773485
zipt-15	0.85098	0.0774359
F53F1.3	0.283029	0.0774359
grl-15	0.554001	0.0780138
kin-3	-0.127613	0.0780138
flh-2	-0.239418	0.0780687
Y55F3BL.4	0.78427	0.0784483
let-60	-0.486134	0.0785344
hpl-1	0.483643	0.0785568
unc-85	-0.218846	0.0785658
wrm-1	0.220829	0.0787647
chl-1	-0.225296	0.0789276
C01G5.9	0.508976	0.0791248
F56A11.5	-0.219048	0.0791248
Y75B8A.7	-0.216071	0.07914
nstp-4	0.29315	0.0795825
trcs-2	-0.195318	0.0798948
ttr-33	0.380121	0.0798948
vha-11	0.180989	0.0798948
ZK809.3	-0.116976	0.0800713
grl-21	1.71595	0.0800713
myo-5	0.532183	0.0800713
ptr-11	0.837241	0.0805657
algn-1	0.209424	0.0805861
Y39B6A.33	-0.265236	0.0808309
Y55B1AR.2	-0.156523	0.0809648
ess-2	0.170478	0.0809648
nra-4	-0.0712275	0.0809648
golg-2	0.106075	0.0810465
fzr-1	-0.151102	0.0810672
sqv-8	0.277942	0.0810672
Y23H5B.1	0.489019	0.0816304
F20D1.3	0.190992	0.0816365
adal-1	0.314252	0.0818241
F26G1.5	0.776387	0.0818241
Y39B6A.42	-0.707682	0.0818241
Y71F9AL.1	0.310408	0.0818241
cux-7	0.149246	0.0818241
cyn-1	0.224283	0.0818241
hsp-75	-0.0960072	0.0818241
ttr-41	0.435566	0.0818241
eif-2A	-0.19022	0.0819172
nuaf-3	-0.115594	0.0819172
pat-12.2	0.396735	0.0819172
vit-1	-0.365314	0.0819172
Y97E10AR.6	-0.158326	0.082103
cey-4	-0.118787	0.0821726
H03A11.2	0.496365	0.0823677
tba-7	2.61798	0.0824674
C56G2.3	0.262363	0.0824959
C09B8.4	1.46852	0.0825623
F53H2.3	-0.305383	0.0831989
cyn-2	0.698863	0.0831989
dcs-1	0.115481	0.0832573
T23F2-5	0.775832	0.0832921
C15B12.1	2.79276	0.0835442
sas-5	-0.14246	0.0835442
W02H5.2	0.302537	0.0839419
syx-5	-0.119721	0.0839419
T16G1.2	0.592369	0.0839592
hpo-34	0.519195	0.0839592
hmt-1	0.140751	0.0840375
rbm-25	0.557789	0.0840375
R74.2	0.716385	0.0840769
ZK899.2	0.211269	0.0841794
npp-26	0.399006	0.0841794
Y54F10AM.8	-0.216564	0.0841794
rsp-5	1.09266	0.0843358
algn-13	0.307424	0.0851604
T25B9.1	0.308773	0.0851604
hmg-1.1	-0.146831	0.0851604
inx-2	-0.214942	0.0851604
mes-1	-0.348472	0.0851604
mcm-7	-0.225264	0.0854852
Y53G8B.1	0.84764	0.0855767
imph-1	0.243817	0.0855767
oma-1	0.478115	0.0859955
C01F1.5	0.471609	0.0863073
dnj-12	-0.180382	0.0863073
etr-1	-0.145154	0.0864262
oig-2	1.10591	0.0864262
pqn-74	0.706315	0.0864262
pygl-1	0.328342	0.0864262
tbcb-1	0.172368	0.0864262
T28A11.2	0.603257	0.0869797
sqst-1	-0.181361	0.0869797
vha-10	0.194261	0.0869797
Y7A5A.1	0.271104	0.0870417
abu-12	0.949033	0.0872767
Y119C1A.1	0.798937	0.0872767
clec-72	1.03113	0.0872767
cox-6c	-0.58549	0.0872767
D1044.6	0.270735	0.0872767
ech-4	0.127681	0.0872767
fbxc-33	0.7911	0.0872767
gpx-1	0.248412	0.0872767
jph-1	0.326101	0.0872767
ptr-15	0.521004	0.0872767
rde-12	-0.128463	0.0872767
scb-1	0.259489	0.0872767
unc-52	0.463804	0.0872767
C29A12.6	0.344221	0.087533
F31E9.6	0.426543	0.0875822
F55G1.9	-0.208532	0.0879567
T19H5.4	-0.302573	0.0879567
nhr-49	-0.331298	0.0884499
vha-5	0.583351	0.0884775
B0361.3	-0.157428	0.0885756
allo-1	-0.284261	0.08868
spe-48	3.10644	0.08868
JC8.2	0.205667	0.08868
dnj-4	0.978567	0.08868
lin-28	0.19615	0.08868
acs-14	0.38506	0.0892695
pqn-52	0.405364	0.0894277
F26A1.1	0.120198	0.0894279
ggtb-1	0.235679	0.0894279
R04B3.3	0.907885	0.0896786
abu-13	0.662443	0.0897194
F25B4.8	0.677565	0.0897194
bet-1	-0.116829	0.0897194
ctr-9	-0.156623	0.0897194
F35H12.5	0.755041	0.0897194
fars-1	-0.147468	0.0897194
ttr-17	0.437974	0.0897194
thoc-3	0.215895	0.0898239
ctsa-4.1	1.4742	0.0900281
ZC262.2	-0.166206	0.0901462
far-6	-0.260095	0.0902226
slc-25a18.2	0.313018	0.0902226
eif-3.H	-0.122102	0.0904496
fipp-1	-0.142796	0.0905687
C11D2.4	0.115917	0.091078
nipa-1	0.236112	0.091078
max-1	0.954879	0.091078
K11H12.5	0.212997	0.091078
rnp-4	-0.200901	0.091078
spt-4	0.232592	0.091078
tmem-208	1.12885	0.091078
ZK632.2	0.129537	0.091078
dnj-11	0.126976	0.0911277
fars-3	-0.157809	0.0911277
M02E1.1	0.856121	0.0913332
zgpa-1	0.257979	0.0914895
R05F9.9	0.26324	0.0915926
fubl-4	0.199524	0.0917982
C35E7.11	4.27424	0.0920103
F14H3.4	-0.186718	0.0920103
C47B2.9	0.189331	0.0920164
W09D10.4	-0.127246	0.0920478
fkb-7	0.287351	0.0920814
F15G9.5	0.92697	0.0921245
F46B6.5	-0.204351	0.0923023
H34I24.2	0.571601	0.0923023
Y75B8A.13	0.284266	0.0923023
Y37E11AM.2	0.326895	0.0923526
eri-5	0.440353	0.0923526
enri-2	0.37464	0.092354
rps-4	-0.0895958	0.09241
mlst-8	0.204084	0.0924965
lsy-22	-0.241207	0.0925159
lnkn-1	0.148287	0.0925159
lex-1	-0.123668	0.0928974
asb-2	0.286517	0.0929038
T26A5.2	0.590187	0.0929038
vbh-1	0.165889	0.0930528
eif-3.B	0.0983526	0.0932261
F09G8.7	0.279658	0.0933016
rict-1	0.149449	0.0933283
snpc-4	-0.11651	0.0934182
Y92H12BL.4	-0.405828	0.0936974
ketn-1	0.504591	0.0936974
smg-1	-0.128771	0.0941228
top-1	-0.147978	0.0941228
rad-54.l	0.223652	0.0943761
aipl-1	0.209165	0.0944011
clc-7	0.395957	0.0946941
C14H10.2	-0.127826	0.094893
Y62E10A.19	0.388582	0.0951063
C41D11.3	-0.319791	0.09514
ril-1	0.128577	0.0954295
zyx-1	0.553331	0.0955432
K10B3.5	-0.519834	0.0955454
vps-26	-0.139884	0.0956634
W04C9.2	0.136466	0.0956634
sec-22	-0.241172	0.0956634
trap-1	-0.120166	0.0956634
nhr-34	0.333716	0.0958391
ptr-1	0.394243	0.0960129
letm-1	0.217812	0.096076
pst-2	1.11312	0.0965231
vha-4	0.515632	0.0965231
ZK792.1	-0.186461	0.0965405
pgp-13	0.494817	0.0965405
tpp-2	0.076629	0.0965405
F54D10.7	-0.805936	0.0970257
F07C6.4	0.975672	0.0970594
Y71H2B.8	0.448791	0.0975286
nars-2	0.153447	0.0976456
mrpl-44	-0.124267	0.0981028
lgc-22	0.768008	0.0983991
F52G3.1	0.154671	0.0983991
pyr-1	-0.113135	0.0983991
nbet-1	-0.149202	0.0984498
dpf-4	0.188276	0.0985364
cmt-1	-0.270136	0.0992097
mlt-10	-1.72408	0.0992097
map-2	-0.158328	0.0996932
ocrl-1	0.273281	0.0996932
ztf-9	0.411568	0.0996932
K02B12.2	0.739478	0.0997116
B0303.14	-0.148004	0.0999127
C29F7.3	0.290677	0.100002
acs-21	0.572632	0.100405
T18D3.1	0.107125	0.100544
hcp-6	-0.246039	0.101075
D1037.1	0.345238	0.101528
F21D5.7	-0.131478	0.101837
ZK1055.7	0.702016	0.101924
D2030.11	0.630128	0.102373
ddx-17	-0.127406	0.102488
pgl-3	0.201917	0.102488
znf-207	0.160093	0.10249
frm-7	0.354189	0.102714
Y67D2.7	-0.158588	0.103196
feh-1	0.749758	0.103196
C37A2.6	0.348459	0.103365
rde-4	-0.147337	0.103394
aatf-1	-0.170856	0.103505
rpn-9	-0.175576	0.103607
T23F2.13	0.544397	0.103669
cct-8	-0.103438	0.10378
apn-1	0.366449	0.104063
mrps-31	-0.0975993	0.104127
C33F10.14	-0.0963629	0.104175
cebp-2	-0.20186	0.104484
dnj-30	-0.129386	0.104484
rep-1	0.20154	0.104484
sftb-2	-0.130137	0.104484
uba-2	0.105524	0.104484
ZK688.7	0.347233	0.104484
dgn-1	-0.159113	0.105192
lys-1	0.414372	0.105192
mel-32	0.13931	0.105846
pmr-1	0.136201	0.105907
arl-8	-0.250972	0.106134
tag-196	0.310994	0.106134
ZK822.2	0.205808	0.106285
wdfy-2	0.114727	0.106309
lim-9	0.514965	0.106371
T05H10.4	-0.176832	0.106489
pqn-42	0.243097	0.106773
algn-2	0.216592	0.106833
dna-2	0.231136	0.106833
F14E5.2	-0.204493	0.106833
hum-5	0.495067	0.106833
nduo-5	-0.5231	0.107024
F40E10.5	0.554192	0.107089
ztf-29	-0.396189	0.107089
Y71H10B.1	0.124886	0.107145
K06G5.1	0.599901	0.107145
F25B5.5	-0.178529	0.107219
F52C12.6	-0.167133	0.108109
aly-3	-0.111967	0.108147
bli-3	0.216136	0.108147
myrf-1	0.475855	0.108147
K07E3.4	0.23798	0.10819
F38A1.8	0.0737839	0.108251
kbrl-1	0.337789	0.108259
tsp-12	0.800293	0.108335
rom-4	0.358274	0.108375
vang-1	-0.125526	0.108375
Y17G7B.20	-0.553543	0.108375
rfip-1	1.76335	0.108375
F41E6.5	1.14834	0.1084
ctps-1	-0.153483	0.108658
Y50D4C.3	0.166072	0.108658
dib-1	0.333097	0.108658
efn-2	0.30286	0.108658
F56B3.11	-0.157432	0.109073
perm-5	0.133753	0.109235
F52B11.2	0.232419	0.109458
F15B9.8	0.455322	0.109783
T07F12.2	0.262407	0.109783
ZK550.3	-0.149622	0.109783
pafo-1	-0.109323	0.109783
dab-1	0.152845	0.10994
mpz-1	0.439572	0.10994
eor-2	0.232581	0.10994
F25H2.6	0.128844	0.10994
K07A1.5	-0.33669	0.10994
Y75B8A.19	0.242245	0.10994
cytb-5.1	0.226521	0.10994
gck-1	0.0948341	0.10994
tim-1	-0.226347	0.10994
tra-4	-0.112215	0.10994
F54C9.3	0.745259	0.11006
mbk-1	0.103782	0.110264
tmem-189	0.296871	0.110264
ubxn-2	0.136369	0.110593
T07D3.9	-0.10787	0.110608
ced-4	0.201374	0.110608
M03F4.6	0.446734	0.110608
gop-2	-0.195446	0.110608
pat-12.1	0.638051	0.110608
timm-23	-0.758792	0.110993
C34D10.1	0.251736	0.111651
cpz-1	-0.26441	0.111651
gsr-1	-0.121235	0.11181
T19E7.6	0.372052	0.111819
dpy-18	0.246583	0.111819
ran-1	0.183615	0.111819
xpd-1	0.245309	0.111819
ZK858.5	0.193737	0.111819
F35D11.4	-0.245805	0.111889
C04A11.2	0.75336	0.11191
got-1.2	0.43225	0.11191
B0303.4	0.527485	0.112511
F59E12.1	-0.170118	0.112511
Y38F2AR.12	0.369197	0.112511
ech-2	-0.159062	0.112596
fbxa-153	0.758261	0.112596
Y59A8B.21	-0.24331	0.112926
kin-20	0.100925	0.113183
ctg-2	0.390919	0.11322
hcp-1	-0.233993	0.113288
pfd-4	-0.165347	0.113474
dig-1	0.424926	0.113517
hpk-1	0.155016	0.113517
T09A5.4	0.309878	0.11418
usp-5	0.196993	0.11418
F55G1.6	0.343122	0.114217
nhr-31	0.267028	0.114217
B0464.6	-0.144404	0.114232
C46F11.4	-0.191253	0.114232
kgb-1	0.332506	0.114232
asp-3	0.644945	0.114423
pqn-24	0.485646	0.11456
F42H10-3	0.585564	0.114697
rnp-2	0.148835	0.114697
sfxn-1.5	0.118718	0.115235
B0507.2	0.329666	0.115585
unc-104	0.236147	0.115723
brp-1	0.580874	0.115818
T23B3.2	-0.322406	0.116061
daf-7	0.70554	0.116253
sdz-8	0.246727	0.116291
tag-321	-0.147802	0.116568
K04H4-2.1	0.375946	0.116784
pkn-1	-0.0823987	0.116902
Y57G11C.9	-0.0744456	0.116932
lec-5	0.267688	0.116932
mlk-1	0.363485	0.116932
C25A1.1	-0.191402	0.117066
F21D5.1	0.119536	0.117535
C18E3.9	0.20629	0.118355
M106.3	0.247597	0.118766
mlp-1	2.73884	0.118766
snr-4	0.559955	0.118766
pfk-1.1	0.0986421	0.11895
ZK637.2	-0.184885	0.11895
tct-1	-0.140427	0.119116
gst-20	0.301746	0.119259
nth-1	-1.87315	0.119323
W09H1.5	0.17319	0.119323
ugt-51	0.436649	0.119341
let-4	-0.338902	0.119779
alh-4	0.146906	0.11979
F58A6.1	0.622389	0.11979
Y70G10A.4	-0.5407	0.11979
F36G3.2	0.285758	0.11979
fce-1	0.112677	0.11979
snf-11	0.606135	0.11979
syx-7	-0.635921	0.11979
ttr-20	0.335616	0.11979
F32A11.1	-0.090503	0.11989
frm-1	0.103026	0.120055
toe-2	-0.164375	0.120311
gyf-1	-0.0725033	0.120311
ima-2	0.216021	0.120311
clsp-1	-0.256654	0.120569
pyk-2	0.386102	0.120569
F27D4.6	-0.233794	0.120703
C41D11.9	0.368169	0.120938
F53F8.5	0.196721	0.120938
gex-2	0.128784	0.120938
hlh-2	-0.442325	0.120938
ipla-1	0.10578	0.120938
isp-1	0.123209	0.120938
adm-4	0.161264	0.121136
mig-32	0.205836	0.121136
spp-13	0.398985	0.121136
Y51H4A.7	0.57143	0.121136
dapk-1	0.467226	0.12134
faah-4	0.138831	0.121504
bet-2	-0.130557	0.121679
cdk-5	0.213947	0.121679
F44E7.4	0.0996922	0.121679
F48C1.5	0.18377	0.121679
Y51H7C.7	0.325103	0.121679
chmp-7	0.105119	0.121679
ifb-1	0.337064	0.121679
lin-9	-0.157519	0.121679
morc-1	0.0901716	0.121679
top-3	0.112196	0.121679
mbtr-1	0.684805	0.121958
hpr-17	0.200906	0.122058
F29B9.1	0.23373	0.12279
cct-5	-0.0954616	0.123176
fmo-1	1.86179	0.123176
mag-1	-0.124402	0.123176
nhr-100	0.411874	0.123216
C17E4.10	0.289846	0.123427
C01B10.9	0.211285	0.123462
Y67D2.2	0.308849	0.123462
cpi-2	0.132066	0.123482
ari-1.3	0.0987331	0.12358
plst-1	0.109408	0.123723
lig-1	0.0907375	0.123859
abhd-3.1	0.29836	0.12402
atad-3	-0.071197	0.12402
F01G4.4	-0.202162	0.12402
ZC412-3	0.587824	0.12402
Y67H2A.2	0.426469	0.12402
Y73E7A.8	0.375302	0.12402
rla-1	-0.207024	0.12402
skat-1	-0.0930189	0.124039
Y105E8A.25	0.155916	0.124076
maea-1	0.198739	0.124373
cutl-14	1.75094	0.124388
R07E4.3	0.196738	0.124419
smc-4	-0.168804	0.124521
hex-5	0.300399	0.125028
flcn-1	0.253003	0.125155
tlk-1	-0.118826	0.125175
W03G11.3	-0.457067	0.125406
bra-2	-0.394278	0.125646
grl-16	0.500875	0.125686
F01F1.11	-0.165358	0.12589
valv-1	0.413086	0.12594
F42H10.6	0.176185	0.126002
pdha-1	-0.0845826	0.126933
chd-3	-0.0752362	0.126933
mfap-1	-0.134982	0.127145
pat-12	0.768663	0.127145
K03B8.6	0.406371	0.127332
cogc-1	0.104546	0.127906
syf-2	-0.0815673	0.128146
ifg-1	-0.0715799	0.12821
cct-2	-0.118513	0.12821
clh-6	-0.149201	0.12821
cox-10	0.338876	0.12821
F10G2.1	0.391377	0.12821
sec-8	0.126997	0.12821
ZK512.4	0.340469	0.12821
C35A5.11	0.448989	0.128301
F18C5.5	0.598904	0.128301
ddx-15	0.187907	0.128301
mrps-18b	0.227151	0.128301
dsl-6	0.416354	0.128437
gbas-1	0.207383	0.128617
T12G3.4	0.151325	0.128701
Y110A2AR.1	0.14742	0.128701
fusm-2	0.266092	0.128701
sup-1	0.607241	0.128701
bckd-1b	0.118072	0.128934
C35E7.6	-0.323539	0.128934
F25H8.2	-0.31559	0.128934
C35E7.5	-0.242551	0.128964
ZK1098-1	-0.0935312	0.128964
exos-4.1	0.12608	0.128964
pas-7	-0.370989	0.128964
T08G5.3	0.840336	0.129159
ugt-60	1.10928	0.129193
rpl-7A	-0.081483	0.129517
igdb-2	-0.102984	0.129531
rab-8	-0.123289	0.129609
let-711	-0.135594	0.129609
ltd-1	0.351506	0.129682
mrpl-46	-0.143574	0.129682
cyh-1	-0.981777	0.130271
F33G12.7	2.0002	0.130271
T04B8.5	-0.324465	0.130271
T20B3.1	0.474244	0.130271
ppfr-4	0.155357	0.130371
H06I04.6	0.329099	0.130655
pfn-1	0.107979	0.130673
cpd-2	0.244235	0.131108
hrde-4	-0.33624	0.131147
lin-38	-0.103493	0.131263
sorb-1	0.444514	0.131297
F01D5.6	0.425695	0.131297
Y97E10AR.1	0.181557	0.131297
meg-3	0.304982	0.131297
psme-3	-0.0887811	0.131297
pde-3	0.22026	0.131528
W02D3.12	0.327006	0.131528
lsd-1	-0.158361	0.131528
ugt-28	0.295724	0.131739
C50F4.12	0.433582	0.132483
cpg-22	0.693273	0.132483
F55C10.4	0.977161	0.132483
szy-20	-0.136377	0.132879
unc-22	0.626228	0.13333
adss-1	0.207326	0.133481
kbp-3	-0.234359	0.133481
pps-1	0.205368	0.133481
ZK1320.2	0.86743	0.133481
F14H3.5	-0.270503	0.133556
slc-25a32	0.24429	0.133556
ari-2	0.165266	0.133915
K07A1.10	-0.181202	0.134
B0511.7	0.22562	0.134024
C56A3.6	0.431384	0.134024
immt-2	-0.124284	0.134102
mec-8	-0.137223	0.134429
xdh-1	0.250441	0.13457
F21F3.6	0.224688	0.135248
sfxn-2	0.430167	0.135385
C53C9.2	0.61852	0.135406
F12F6.7	0.209101	0.135406
lim-8	0.238395	0.135406
C17G1.5	0.348643	0.13576
atgp-2	0.417157	0.1361
Y25C1A.7	-0.176552	0.1361
sav-1	-0.21846	0.136244
Y106G6D.5	0.38953	0.136274
ubc-18	-0.15874	0.136274
cyn-6	0.169388	0.136325
coa-6	1.64771	0.13633
nuc-1	0.206404	0.136614
mig-18	0.252567	0.137225
rbm-25	-0.115389	0.137395
C11H1.9	-0.386952	0.137667
Y105E8A.21	-0.140955	0.137667
rpl-36.A	-0.0792336	0.137726
baf-1	0.242286	0.137943
F48E3.4	0.264318	0.137943
K11H12.8	0.323309	0.137943
nxf-2	0.328135	0.137943
Y75B8A.14	-0.221578	0.137986
lyst-1	0.285694	0.137986
mtp-18	0.437805	0.137986
tcab-1	0.311344	0.137986
vps-22	0.11779	0.137986
T04G9.7	0.300044	0.138356
cox-7c	0.356877	0.138356
T05B9.1	0.244125	0.138527
C18C4.7	0.27659	0.138567
F08F1.9	0.620997	0.138859
T20D3.6	-0.31436	0.13902
Y79H2A.3	0.0981388	0.139344
glf-1	0.505156	0.139344
ttc-4	-0.179387	0.139609
F56C9.10	-0.0984035	0.139916
F11E6.9	0.374921	0.139916
imb-3	-0.0891714	0.139916
mans-3	0.253619	0.139916
ZC13.1	0.135142	0.140075
ges-1	0.515665	0.140075
C53D5.5	0.14821	0.140257
cdd-1	0.366244	0.140288
R05D3.2	0.486715	0.140822
maph-1.3	-0.198524	0.14166
B0303.3	0.128162	0.141756
cfh-1	0.996634	0.14183
riok-2	-0.161084	0.14183
F56C11.3	0.289111	0.141924
Y6D1A.2	1.05573	0.141945
T22F7.3	1.12161	0.142174
cogc-8	0.134912	0.142364
dnj-5	0.205268	0.142507
vamp-7	-0.273332	0.142507
Y59C2A.2	0.257448	0.14251
ZK512.2	-0.12513	0.14251
ceh-43	0.21994	0.142645
zyg-11	0.694204	0.142671
acy-1	1.38839	0.142757
C02D5.2	0.273702	0.142757
ifb-2	0.437327	0.142757
flu-2	0.188882	0.142757
col-97	0.790725	0.142891
cut-3	0.55395	0.143157
C01G6.3	-0.0955771	0.143293
let-721	0.120398	0.143561
C56C10.9	0.292684	0.143706
rgs-5	0.437254	0.143706
gad-1	0.106249	0.143706
tcer-1	-0.104684	0.143706
K04C2.3	0.175956	0.144028
ubh-3	-0.194807	0.144091
fce-2	1.50034	0.144123
F43G6.4	0.229814	0.144853
Y106G6H.14	0.166685	0.144853
Y22D7AL.9	0.606122	0.144853
sel-9	-0.381426	0.144853
vrk-1	0.126768	0.144853
cyp-23a1	0.58596	0.144905
H11E01.3	0.266293	0.144999
acs-3	0.164801	0.145145
H12D21.10	-0.353063	0.145145
K07C5.6	-0.0858278	0.145145
D2005.6	0.925685	0.145327
gars-1	0.764208	0.145588
agxt-1	0.24475	0.145992
T05G5-5	0.203395	0.146295
acdh-12	0.0833987	0.146301
sups-1	0.371439	0.146318
pyc-1	0.140062	0.146508
elpc-3	-0.0732011	0.146623
M18.3	0.225931	0.14678
ret-1	0.638179	0.14678
rad-51	-0.264183	0.147001
mter-4	-0.195715	0.147079
fbxl-1	0.618443	0.147257
H28G03.2	-0.376448	0.147451
tsp-17	1.15361	0.147726
ddp-1	-0.462901	0.147811
M01F1.4	0.276665	0.148362
kin-1.1	0.840883	0.148631
F48E8.2	-0.105437	0.148637
R148.5	0.174639	0.148654
hpo-27	0.177335	0.148698
C48B6.10	0.607228	0.148924
gcc-2	0.130462	0.149272
pqn-65	-0.405349	0.149549
hpo-31	-0.0915282	0.149693
F54F2.9	-0.0842485	0.149766
snx-17	0.521035	0.149766
hpo-9	0.276378	0.149815
ZK1320.9	0.151905	0.149881
C16C2.4	-0.139264	0.150064
F46C5.9	0.117346	0.150083
grl-10	0.431656	0.150411
lgg-3	0.370919	0.150752
C13B7.6	-0.175514	0.150846
metr-1	0.163657	0.150846
unc-5	0.137466	0.150889
rpt-1	0.0942087	0.151062
guk-1	0.182945	0.151113
fzy-1	-0.191469	0.151113
ptpn-22	-0.102889	0.151113
set-14	0.107719	0.151113
stl-1	-0.213901	0.151113
klo-1	0.707946	0.15118
psf-3	-0.183063	0.15118
tkt-1	0.106616	0.15118
R02D5.8	0.323761	0.151405
rsp-2	-0.103635	0.151712
erp-44.2	0.284974	0.152149
pam-1	1.43354	0.152149
ced-1.1	0.336437	0.152155
mab-7	0.415524	0.152252
zig-12	0.601141	0.152252
F33A8.7	0.503801	0.15237
affl-2	-0.927194	0.152437
brf-1	0.0865631	0.152437
T24B8.4	0.449615	0.152437
F56A8.5	-0.677257	0.152437
K03B4.1	0.121111	0.152437
R07G3.8	4.74415	0.152437
Y55F3AR.2	0.146311	0.152437
rpb-9	-0.159258	0.152437
unc-94	0.219106	0.152807
EEED8.3	-0.170856	0.152989
ppfr-2	-0.0874986	0.15299
ubq-2	-0.171388	0.153088
pie-1	0.2971	0.153374
B0281.5	-0.216557	0.153501
bcat-1	0.499118	0.153785
Y111B2A.12	-0.303718	0.153785
lpd-5	0.224369	0.154266
ZK686.3	-0.0995161	0.154266
Y87G2A.1	0.111972	0.154309
E02H1.5	0.171524	0.154309
W04C9.4	-0.162056	0.15445
Y105E8A.11	0.121572	0.15445
slc-25a18.1	0.242902	0.154524
F35G2.1	0.253008	0.155122
F56A8.3	-0.10443	0.155122
T01H3.2	0.216567	0.155122
Y69H2.7	-0.18062	0.155122
idhb-1	0.134055	0.155122
klp-12	0.156471	0.155122
algn-6	0.752653	0.155161
nrfl-1	0.303405	0.155209
par-6	-0.0922271	0.155815
fem-1	0.149746	0.15597
ssna-1	-0.207141	0.15597
H43I07.1	0.223932	0.155996
taf-8	0.381637	0.15604
erd-2.1	0.92117	0.15604
ncs-2	0.321452	0.15604
mtm-3	-0.157989	0.156106
nrd-1	-0.162015	0.156952
ile-1	-0.112665	0.157925
C01G10.9	0.251649	0.15827
eipr-1	0.205186	0.15833
perm-2	-0.414148	0.158585
fbxc-14	0.165516	0.158717
C25D7.10	1.57653	0.158854
mus-81	0.2242	0.158854
F53F4.12	-0.293894	0.158904
mig-5	-0.10752	0.158904
nuo-2	-0.0796338	0.158904
ztf-3	0.166393	0.15901
cbl-1	0.235508	0.15901
F59B1.2	0.640964	0.15901
dss-1	0.781802	0.15901
micu-1	0.160974	0.15901
aman-2	-0.091203	0.159224
C29G2.3	1.13482	0.159224
gon-2	0.280246	0.159224
inx-9	0.789519	0.159224
T23G5.2	-0.106344	0.159224
rps-5	0.238827	0.159286
epg-6	-0.192594	0.15964
pop-1	-0.234851	0.15964
BE0003N10.1	0.118274	0.159779
C14H10.3	0.368346	0.159779
F08F8.9	-0.13988	0.159779
F28D9.4	-0.145715	0.159779
F35E12.10	0.621157	0.159779
mup-4	0.411	0.159779
rtel-1	0.231115	0.159779
mrpl-28	-0.117072	0.159995
C33D9.13	-0.171309	0.160414
F56D2.2	0.134764	0.160414
ule-4	0.367332	0.160414
alkb-7	0.251276	0.160456
sox-2	-0.345023	0.160917
tin-9.2	-0.279735	0.160917
vha-14	0.171833	0.160917
cup-15	-0.179353	0.161222
lbp-5	0.305704	0.161257
T19C4.1	0.3265	0.161309
ran-4	-0.109144	0.161514
ZC250.2	2.93653	0.161605
gpd-4	0.665707	0.161839
F40G12.11	-0.22288	0.162021
nhr-35	0.328513	0.162487
B0001.8	-0.134931	0.162532
T08A11.1	0.116536	0.162706
mthf-1.1	2.92697	0.162929
C02F5.5	-0.882051	0.163646
F45F2.10	-0.223749	0.163646
egl-21	0.541142	0.163718
srp-7	0.198582	0.163718
swsn-1	-0.0764006	0.163864
uev-3	0.351126	0.163875
hst-2	0.314772	0.163875
pigw-1	1.13133	0.163875
ufc-1	0.370485	0.163875
acp-2	0.444004	0.164038
wht-7	0.119721	0.164038
bre-1.1	0.346945	0.164306
Y61A9LA.1	0.873334	0.164306
dod-23	0.379923	0.164306
vps-39	0.244612	0.164306
K02C4-3	-0.10906	0.164561
Y111B2A.3	0.215145	0.164561
rpb-8	-0.21659	0.165015
Y32H12A.7	0.161913	0.165667
T25G3.3	-0.0931241	0.165726
EEED8.10	0.209426	0.165751
K09E9.3	0.150437	0.165911
E04F6.9	0.458361	0.165936
mrpl-17	-0.100126	0.165936
C23H3.9	0.529153	0.165998
F43C11.8	0.160115	0.166403
cas-2	0.225114	0.166403
F26A10.2	0.351214	0.166836
exc-4	0.0959821	0.166836
spl-1	0.178694	0.166836
gta-1	0.277563	0.166955
skr-20	0.607694	0.166955
unc-18	0.157845	0.16702
Y48C3A.20	-0.142327	0.167079
era-1	-0.184241	0.167247
cyy-1	-0.285299	0.167346
ccr-4	-0.102062	0.167571
epn-1	0.130852	0.167815
alp-1	0.413979	0.168366
F35A5.8	0.221992	0.169226
E04F6.8	0.397435	0.169614
Y48E1B.8	0.421845	0.169614
mrps-26	-0.115642	0.169614
aat-3	-0.176388	0.169624
smg-5	0.144803	0.169624
C26B9.1	0.264867	0.169821
exo-1	-0.319935	0.169821
mpst-1	0.159552	0.169821
ngp-1	-0.145173	0.169858
C39E9.12	-0.139646	0.170026
sut-1	-0.302504	0.170073
ger-1	0.281188	0.170101
F41D9.2	0.478482	0.170215
cyk-7	-0.131287	0.170215
icd-1	-0.235916	0.170215
C52G5.2	0.498796	0.170227
W05H9.1	0.963113	0.170227
Y61A9LA.10	-0.185925	0.170227
cul-3	0.0962281	0.170227
C49H3.16	0.81397	0.170724
tut-2	-0.373386	0.170724
dao-5	-0.108309	0.170779
[truncated: 5,162 more rows]
